# Supplementary material
Source: MDPI journal article supplement (https://www.mdpi.com/2071-1050/11/5/1487)
Supplement: s1 [file s1]

201412030034	2015	1	3	0	1	1	1	0	0	95	10	33.303566	44.371773	0	3	0	0	0	6	15	0	0	0	0	0	0	14	73	95	0	0	0	0	0	0	-99	0	2	0	0	5	0	0	1	3	-99	0	-99	-99
201501010001	2015	1	1	0	1	1	1	0	0	95	10	33.303566	44.371773	0	3	0	0	0	6	15	0	0	0	0	0	0	8	48	95	0	0	0	0	0	0	-99	0	1	0	0	1	0	0	1	3	-99	0	-99	-99
201501010002	2015	1	1	0	1	1	1	0	0	198	8	59.857979	17.639822	0	7	0	0	0	8	19	0	0	0	0	0	0	15	86	198	0	0	0	0	0	0	1	0	0	0	0	0	0	0	0	4	-99	0	-99	-99
201501010004	2015	1	1	0	1	1	1	0	0	95	10	33.303566	44.371773	0	3	0	0	0	6	16	0	0	0	0	0	0	1	7	95	0	0	0	0	0	0	-99	0	3	0	0	8	0	0	1	3	-99	0	-99	-99
201501010005	2015	1	1	0	1	1	1	0	0	95	10	33.303566	44.371773	0	3	0	0	0	6	16	0	0	0	0	0	0	14	79	95	0	0	0	0	0	0	-99	0	1	0	0	6	0	0	-9	4	-99	0	-99	-99
201501010006	2015	1	1	0	1	1	1	0	0	95	10	33.303566	44.371773	0	3	0	0	0	6	16	0	0	0	0	0	0	1	7	95	0	0	0	0	0	0	-99	0	1	0	0	6	0	0	1	3	-99	0	-99	-99
201501010007	2015	1	1	0	1	1	1	0	0	95	10	33.057991	44.354839	0	3	0	0	0	6	16	0	0	0	0	0	0	1	2	95	0	0	0	0	0	0	-99	0	2	0	0	10	0	0	1	3	-99	0	-99	-99
201501010011	2015	1	1	0	1	1	1	0	0	92	6	9.869925	78.479669	1	3	0	0	0	6	31	0	0	0	0	0	0	1	2	92	0	0	0	0	0	0	-99	0	0	0	0	0	0	0	0	4	-99	0	-99	-99
201501010013	2015	1	1	0	0	1	1	1	0	153	6	24.891115	67.143311	0	2	0	0	0	5	5	0	0	0	0	0	0	14	77	153	0	0	0	0	0	0	2	0	1	0	0	1	0	0	1	3	-99	0	-99	-99
201501010018	2015	1	1	0	1	1	1	0	0	153	6	30.366281	68.599642	0	6	7	0	0	5	5	8	18	0	0	0	0	3	22	153	0	0	0	0	0	0	7	0	0	0	0	0	0	0	1	3	-99	1	-99	0
201501010020	2015	1	1	0	1	1	1	0	0	95	10	30.383333	47.7	0	2	0	0	0	5	5	0	0	0	0	0	0	15	85	95	0	0	0	0	0	0	-99	0	3	0	0	2	0	0	1	3	-99	0	-99	-99
201501010022	2015	1	1	0	1	1	1	0	0	4	6	34.417122	70.449593	0	3	0	0	0	6	29	0	0	0	0	0	0	3	23	4	0	0	0	0	0	0	-99	0	1	0	0	1	0	0	1	3	-99	0	-99	-99
201501010024	2015	1	1	0	1	1	1	0	0	155	10	31.784838	35.224613	0	7	0	0	0	8	19	0	0	0	0	0	0	14	76	97	0	0	0	0	0	0	-99	0	0	0	0	0	0	0	1	3	-99	0	-99	-99
201501010068	2015	1	1	0	1	1	1	0	0	4	6	32.453788	62.031136	0	3	0	0	0	6	16	0	0	0	0	0	0	3	25	4	0	0	0	0	0	0	-99	0	0	0	0	1	0	0	0	4	-99	0	-99	-99
201501010070	2015	1	1	0	1	1	1	0	0	228	10	15.914915	48.650745	0	3	0	0	0	6	16	0	0	0	0	0	0	20	0	228	0	0	0	0	0	0	-99	0	0	0	0	0	0	0	0	4	-99	0	-99	-99
201501010074	2015	1	1	0	1	1	0	1	0	228	10	15.470053	45.322776	0	9	0	0	0	13	0	0	0	0	0	0	0	4	34	228	0	0	0	0	0	0	-99	0	0	0	0	0	0	0	1	4	-99	0	-99	-99
201501010075	2015	1	1	0	1	1	1	0	0	200	10	36.201721	37.14352	0	3	0	0	0	6	11	0	0	0	0	0	0	14	75	200	0	0	0	0	0	0	-99	0	13	0	0	18	0	0	1	3	-99	0	-99	-99
201501010082	2015	1	1	0	1	1	1	0	0	4	6	36.728591	68.868066	0	2	0	0	0	5	5	0	0	0	0	0	0	14	67	4	0	0	0	0	0	0	2	0	2	0	2	0	0	0	0	4	-99	0	-99	-99
201501010083	2015	1	1	0	1	1	1	0	0	4	6	37.184444	68.914444	0	3	0	0	0	6	29	0	0	0	0	0	0	3	23	4	0	0	0	0	0	0	1	1	0	0	0	0	0	0	0	4	-99	0	-99	-99
201501010095	2015	1	1	1	1	1	1	0	0	153	6	28.893738	64.405846	0	6	0	0	0	13	0	0	0	0	0	0	0	14	69	153	0	0	0	0	0	0	-99	0	0	0	0	0	0	0	0	4	-99	1	1	0
201501020001	2015	1	2	0	1	1	1	0	0	95	10	33.303566	44.371773	0	3	0	0	0	6	16	0	0	0	0	0	0	1	7	95	0	0	0	0	0	0	-99	0	2	0	0	5	0	0	1	3	-99	0	-99	-99
201501020002	2015	1	2	0	1	1	1	0	0	95	10	33.303566	44.371773	0	3	0	0	0	6	16	0	0	0	0	0	0	14	67	95	0	0	0	0	0	0	-99	0	1	0	0	6	0	0	-9	4	-99	0	-99	-99
201501020043	2015	1	2	0	1	1	1	0	0	4	6	32.613889	65.81	0	3	0	0	0	6	16	0	0	0	0	0	0	14	76	4	0	0	0	0	0	0	-99	0	1	0	0	0	0	0	-9	4	-99	0	-99	-99
201501020044	2015	1	2	0	1	1	1	0	0	182	11	2.059819	45.326115	0	3	0	0	0	6	15	0	0	0	0	0	0	7	45	209	14	67	182	0	0	0	-99	0	1	0	0	2	0	0	-9	4	-99	0	-99	-99
201501020048	2015	1	2	0	1	1	1	0	0	153	6	36.337837	73.83777	0	3	0	0	0	6	17	0	0	0	0	0	0	2	18	153	0	0	0	0	0	0	-99	0	0	0	0	0	0	0	0	4	-99	0	-99	-99
201501020049	2015	1	2	0	0	1	1	1	0	186	6	7.483368	80.367085	0	2	0	0	0	5	5	0	0	0	0	0	0	2	15	186	0	0	0	0	0	0	-99	0	0	0	0	1	0	0	-9	4	-99	0	-99	-99
201501020053	2015	1	2	0	1	1	1	0	0	153	6	28.373562	67.565649	0	2	0	0	0	5	5	0	0	0	0	0	0	3	25	153	0	0	0	0	0	0	-99	0	2	0	1	0	0	0	1	3	-99	0	-99	-99
201501020055	2015	1	2	0	1	1	1	0	0	95	10	33.349159	43.784199	0	3	0	0	0	6	11	0	0	0	0	0	0	14	75	95	0	0	0	0	0	0	-99	0	20	0	0	30	0	0	1	3	-99	0	-99	-99
201501020058	2015	1	2	0	1	1	0	1	0	153	6	33.518611	70.802222	0	2	0	0	0	5	5	0	0	0	0	0	0	4	27	153	0	0	0	0	0	0	-99	0	0	0	0	1	0	0	-9	4	-99	0	-99	-99
201501020059	2015	1	2	0	1	1	1	0	0	4	6	31.60063	64.369652	0	3	0	0	0	6	29	0	0	0	0	0	0	1	3	4	0	0	0	0	0	0	-99	0	4	0	0	0	0	0	1	3	-99	0	-99	-99
201501020080	2015	1	2	0	1	1	1	0	0	160	5	6.660501	122.138992	0	3	0	0	0	6	17	0	0	0	0	0	0	14	73	160	0	0	0	0	0	0	-99	0	0	0	0	0	0	0	0	4	-99	0	-99	-99
201501020081	2015	1	2	0	1	1	0	1	0	4	6	34.417122	70.449593	0	3	0	0	0	6	11	0	0	0	0	0	0	4	27	4	0	0	0	0	0	0	-99	0	0	0	0	0	0	0	0	4	-99	0	-99	-99
201501020082	2015	1	2	0	1	1	1	0	0	4	6	33.242222	69.828056	0	3	0	0	0	6	8	0	0	0	0	0	0	20	0	0	0	0	0	0	0	0	1	0	1	0	1	0	0	0	0	4	-99	0	-99	-99
201501020094	2015	1	2	1	1	1	1	0	0	130	1	19.058698	-96.15845	0	1	0	0	0	9	23	0	0	0	0	0	0	10	53	130	0	0	0	0	0	0	-99	0	1	0	0	0	0	0	0	4	-99	1	1	0
201501030035	2015	1	3	0	1	1	1	0	0	95	10	33.303566	44.371773	0	1	0	0	0	6	16	0	0	0	0	0	0	2	18	95	0	0	0	0	0	0	-99	0	1	0	0	4	0	0	1	3	-99	0	-99	-99
201501030038	2015	1	3	0	1	1	1	0	0	95	10	33.043201	44.641945	0	3	0	0	0	6	16	0	0	0	0	0	0	1	11	95	0	0	0	0	0	0	-99	0	0	0	0	8	0	0	-9	4	-99	0	-99	-99
201501030039	2015	1	3	0	1	1	0	1	0	95	10	34.928947	43.493056	0	1	0	0	0	6	16	0	0	0	0	0	0	4	34	95	0	0	0	0	0	0	-99	0	0	0	0	2	0	0	1	3	-99	0	-99	-99
201501030044	2015	1	3	0	1	1	1	0	0	214	9	46.498405	30.716375	0	3	0	0	0	6	16	0	0	0	0	0	0	1	1	214	0	0	0	0	0	0	-99	0	0	0	0	0	0	0	1	3	-99	0	-99	-99
201501030050	2015	1	3	0	1	1	1	0	0	4	6	34.346722	62.197315	0	3	0	0	0	6	7	0	0	0	0	0	0	7	46	153	0	0	0	0	0	0	2	0	0	0	0	0	0	0	1	3	-99	0	-99	-99
201501030059	2015	1	3	0	1	1	0	1	0	4	6	34.346722	62.197315	0	3	0	0	0	6	29	0	0	0	0	0	0	4	35	4	0	0	0	0	0	0	-99	0	0	0	0	2	0	0	1	4	-99	0	-99	-99
201501030060	2015	1	3	0	1	1	1	0	0	153	6	28.54439	68.218002	1	3	0	0	0	6	16	0	0	0	0	0	0	21	106	153	0	0	0	0	0	0	-99	0	0	0	0	0	0	0	0	4	-99	0	-99	-99
201501030061	2015	1	3	0	1	1	1	0	0	153	6	26.444275	65.224275	0	3	0	0	0	6	16	0	0	0	0	0	0	20	0	153	0	0	0	0	0	0	-99	0	0	0	0	0	0	0	0	4	-99	0	-99	-99
201501030073	2015	1	3	0	1	0	1	1	0	200	10	35.628849	36.458794	0	3	0	0	0	6	15	0	0	0	0	0	0	2	21	200	17	93	200	0	0	0	-99	0	5	0	0	10	0	0	-9	4	-99	0	-99	-99
201501030082	2015	1	3	0	1	1	1	0	0	4	6	33.542622	68.415329	0	2	0	0	0	5	5	0	0	0	0	0	0	14	77	4	0	0	0	0	0	0	-99	0	2	0	0	0	0	0	-9	4	-99	0	-99	-99
201501030083	2015	1	3	0	1	1	1	0	1	4	6	35.221192	71.049777	0	2	0	0	0	5	5	0	0	0	0	0	0	2	20	4	0	0	0	0	0	0	-99	0	1	0	0	0	0	0	0	4	-99	0	-99	-99
201501030084	2015	1	3	0	1	1	1	0	1	4	6	35.190189	70.993524	0	7	0	0	0	8	18	0	0	0	0	0	0	2	20	4	0	0	0	0	0	0	-99	0	0	0	0	0	0	0	1	3	-99	0	-99	-99
201501030090	2015	1	3	0	1	1	1	0	0	228	10	15.325443	44.211895	0	3	0	0	1	6	13	0	0	0	0	0	0	14	78	228	0	0	0	0	0	0	1	0	0	0	0	0	0	0	0	4	-99	0	-99	-99
201501030092	2015	1	3	0	1	1	0	1	0	153	6	33.695975	70.336069	0	2	0	0	0	5	4	0	0	0	0	0	0	4	34	153	0	0	0	0	0	0	-99	0	1	0	0	0	0	0	0	4	-99	0	-99	-99
201501030093	2015	1	3	0	1	1	1	0	0	153	6	33.695975	70.336069	0	7	0	0	0	8	18	0	0	0	0	0	0	14	77	153	0	0	0	0	0	0	-99	0	0	0	0	0	0	0	1	3	-99	0	-99	-99
201501030102	2015	1	3	0	1	1	1	0	0	213	11	0.422329	32.541517	0	2	0	0	0	5	5	0	0	0	0	0	0	15	85	213	0	0	0	0	0	0	-99	0	0	0	0	0	0	0	0	4	-99	0	-99	-99
201501040001	2015	1	4	0	1	1	1	0	0	95	10	34.880927	44.620853	0	3	0	0	0	6	15	0	0	0	0	0	0	14	67	95	0	0	0	0	0	0	-99	0	0	0	0	2	0	0	1	3	-99	0	-99	-99
201501040002	2015	1	4	0	1	1	1	0	0	95	10	33.303566	44.371773	0	3	0	0	0	6	29	0	0	0	0	0	0	19	99	95	0	0	0	0	0	0	-99	0	2	0	0	3	0	0	1	3	-99	0	-99	-99
201501040003	2015	1	4	0	1	1	1	0	0	95	10	31.98958	44.923775	0	1	0	0	0	6	15	0	0	0	0	0	0	2	15	95	0	0	0	0	0	0	-99	0	0	0	0	0	0	0	1	3	-99	0	-99	-99
201501040004	2015	1	4	0	1	1	1	0	0	95	10	33.303566	44.371773	0	3	0	0	0	6	16	0	0	0	0	0	0	14	74	95	0	0	0	0	0	0	-99	0	1	0	0	7	0	0	-9	4	-99	0	-99	-99
201501040005	2015	1	4	0	1	1	1	0	0	95	10	35.303047	44.329933	1	3	0	0	0	6	16	0	0	0	0	0	0	1	7	95	0	0	0	0	0	0	-99	0	1	0	0	0	0	0	-9	4	-99	0	-99	-99
201501040006	2015	1	4	0	1	1	1	0	0	95	10	33.303566	44.371773	0	3	0	0	0	6	16	0	0	0	0	0	0	1	7	95	0	0	0	0	0	0	-99	0	3	0	0	6	0	0	-9	4	-99	0	-99	-99
201501040007	2015	1	4	0	1	1	1	0	0	95	10	33.303566	44.371773	0	3	0	0	0	6	16	0	0	0	0	0	0	14	67	95	0	0	0	0	0	0	-99	0	3	0	0	8	0	0	-9	4	-99	0	-99	-99
201501040008	2015	1	4	0	1	1	1	0	0	95	10	33.460819	44.157433	0	3	0	0	0	6	11	0	0	0	0	0	0	14	76	95	0	0	0	0	0	0	-99	0	3	0	0	7	0	0	1	3	-99	0	-99	-99
201501040009	2015	1	4	0	1	1	1	0	0	153	6	29.548279	67.879189	0	3	0	0	0	6	15	0	0	0	0	0	0	14	78	153	0	0	0	0	0	0	-99	0	0	0	0	0	0	0	0	4	-99	0	-99	-99
201501040013	2015	1	4	0	1	1	1	0	0	214	9	46.48461	30.715515	0	3	0	0	0	6	16	0	0	0	0	0	0	14	83	214	0	0	0	0	0	0	-99	0	0	0	0	0	0	0	1	3	-99	0	-99	-99
201501040017	2015	1	4	0	1	1	1	0	0	19	6	23.791275	90.418205	0	3	0	0	0	6	17	0	0	0	0	0	0	10	53	19	0	0	0	0	0	0	-99	0	0	0	0	0	0	0	-9	4	-99	0	-99	-99
201501040020	2015	1	4	0	1	1	1	0	0	153	6	33.748011	70.962931	0	3	0	0	0	6	16	0	0	0	0	0	0	14	78	153	0	0	0	0	0	0	-99	0	4	0	0	8	0	0	-9	4	-99	0	-99	-99
201501040023	2015	1	4	0	1	1	1	0	0	153	6	34.322759	71.399435	0	9	0	0	0	13	0	0	0	0	0	0	0	12	61	153	0	0	0	0	0	0	-99	0	0	0	0	1	0	0	-9	4	-99	0	-99	-99
201501040028	2015	1	4	0	1	1	1	0	0	19	6	23.791275	90.418205	1	1	0	0	0	6	17	0	0	0	0	0	0	14	84	19	0	0	0	0	0	0	-99	0	1	0	0	4	0	0	-9	4	-99	0	-99	-99
201501040030	2015	1	4	0	1	1	1	0	0	123	11	16.265509	-0.026982	1	7	0	0	0	8	18	0	0	0	0	0	0	7	47	422	0	0	0	0	0	0	-99	0	0	0	0	0	0	0	1	3	-99	0	-99	-99
201501040035	2015	1	4	0	1	1	1	0	0	4	6	33.065829	68.233333	0	1	0	0	0	6	16	0	0	0	0	0	0	3	25	4	0	0	0	0	0	0	-99	0	2	0	0	2	0	0	1	3	-99	0	-99	-99
201501040036	2015	1	4	0	1	1	1	0	0	4	6	32.453788	62.031136	0	3	0	0	0	6	16	0	0	0	0	0	0	3	25	4	14	67	4	0	0	0	-99	0	1	0	0	1	0	0	-9	4	-99	0	-99	-99
201501040043	2015	1	4	1	0	1	1	1	0	113	10	31.197586	16.586681	0	6	0	0	0	13	0	0	0	0	0	0	0	8	48	95	0	0	0	0	0	0	-99	0	0	0	0	0	0	0	0	4	-99	1	4	0
201501040053	2015	1	4	0	1	1	1	0	0	19	6	23.791275	90.418205	0	3	0	0	0	6	17	0	0	0	0	0	0	1	7	19	0	0	0	0	0	0	-99	0	0	0	0	1	0	0	-9	4	-99	0	-99	-99
201501040054	2015	1	4	0	1	1	1	0	0	19	6	23.791275	90.418205	0	3	0	0	0	6	17	0	0	0	0	0	0	20	0	19	0	0	0	0	0	0	-99	0	0	0	0	0	0	0	-9	4	-99	0	-99	-99
201501050001	2015	1	5	0	1	1	1	0	0	95	10	33.303566	44.371773	0	3	0	0	0	6	16	0	0	0	0	0	0	14	74	95	0	0	0	0	0	0	-99	0	1	0	0	9	0	0	-9	4	-99	0	-99	-99
201501050002	2015	1	5	0	1	1	1	0	0	95	10	33.303566	44.371773	0	3	0	0	0	6	16	0	0	0	0	0	0	1	7	95	0	0	0	0	0	0	-99	0	1	0	0	6	0	0	-9	4	-99	0	-99	-99
201501050003	2015	1	5	0	1	1	1	0	0	95	10	32.982933	44.361595	0	3	0	0	0	6	17	0	0	0	0	0	0	4	34	95	17	94	95	0	0	0	-99	0	5	0	0	15	0	0	1	3	-99	0	-99	-99
201501050004	2015	1	5	0	1	1	1	0	0	95	10	34.01918	44.996505	0	3	0	0	0	6	16	0	0	0	0	0	0	8	49	95	0	0	0	0	0	0	-99	0	0	0	0	0	0	0	0	4	-99	0	-99	-99
201501050022	2015	1	5	0	1	1	1	0	1	214	9	47.659451	33.716668	0	3	0	0	0	6	7	0	0	0	0	0	0	20	0	214	0	0	0	0	0	0	1	0	0	0	0	0	0	0	-9	4	-99	0	-99	-99
201501050023	2015	1	5	0	1	1	1	0	1	214	9	47.659451	33.716668	0	3	0	0	0	6	7	0	0	0	0	0	0	20	0	214	0	0	0	0	0	0	1	0	0	0	0	0	0	0	-9	4	-99	0	-99	-99
201501050024	2015	1	5	0	1	1	1	0	0	214	9	46.639806	32.62154	0	7	0	0	0	8	18	0	0	0	0	0	0	14	83	214	0	0	0	0	0	0	-99	0	0	0	0	0	0	0	1	3	-99	0	-99	-99
201501050028	2015	1	5	0	1	1	1	0	0	153	6	30.200819	66.994354	0	3	0	0	0	6	16	0	0	0	0	0	0	20	0	153	0	0	0	0	0	0	1	0	1	0	1	0	0	0	0	4	-99	0	-99	-99
201501050032	2015	1	5	0	1	1	1	0	0	153	6	34.683281	71.216293	0	3	0	0	0	6	16	0	0	0	0	0	0	14	77	153	0	0	0	0	0	0	-99	0	0	0	0	1	0	0	1	3	-99	0	-99	-99
201501050038	2015	1	5	0	1	1	1	0	0	4	6	35.008338	71.450864	0	3	0	0	0	6	16	0	0	0	0	0	0	4	34	4	14	67	4	0	0	0	-99	0	1	0	0	0	0	0	0	4	-99	0	-99	-99
201501050043	2015	1	5	0	1	1	1	0	0	4	6	35.207547	66.271154	0	3	0	0	1	6	13	0	0	0	0	0	0	2	21	4	0	0	0	0	0	0	3	1	2	0	2	1	0	1	0	4	-99	0	-99	-99
201501050046	2015	1	5	0	1	1	1	0	0	228	10	15.798056	46.081667	0	3	0	0	0	6	16	0	0	0	0	0	0	21	108	228	0	0	0	0	0	0	-99	0	0	0	0	0	0	0	1	4	-99	0	-99	-99
201501050056	2015	1	5	0	1	1	1	0	0	160	5	15.814056	120.320635	0	2	0	0	0	5	5	0	0	0	0	0	0	2	15	160	0	0	0	0	0	0	-99	0	1	0	0	0	0	0	0	4	-99	0	-99	-99
201501050057	2015	1	5	0	0	1	1	1	0	160	5	16.6715	121.5318	0	2	0	0	0	5	5	0	0	0	0	0	0	2	15	160	0	0	0	0	0	0	-99	0	1	0	0	0	0	0	0	4	-99	0	-99	-99
201501050064	2015	1	5	0	1	1	1	0	0	19	6	23.015022	91.398509	0	3	0	0	0	6	17	0	0	0	0	0	0	14	70	19	0	0	0	0	0	0	-99	0	0	0	0	2	0	0	1	3	-99	0	-99	-99
201501060001	2015	1	6	0	1	1	1	0	0	60	10	31.212225	34.117065	0	3	0	0	1	6	13	0	0	0	0	0	0	3	22	60	0	0	0	0	0	0	1	0	1	0	1	0	0	0	0	4	-99	0	-99	-99
201501060004	2015	1	6	0	1	1	1	0	0	60	10	28.086801	30.762019	0	2	0	0	0	5	2	0	0	0	0	0	0	3	25	60	15	86	60	0	0	0	-99	0	2	0	0	0	0	0	1	4	-99	0	-99	-99
201501060008	2015	1	6	0	0	1	1	1	0	34	11	-3.440833	30.573889	0	5	7	0	0	5	2	8	18	0	0	0	0	22	109	34	0	0	0	0	0	0	5	0	3	0	0	0	0	0	1	3	-99	1	3	0
201501060009	2015	1	6	0	1	1	1	0	0	153	6	28.518663	68.542679	0	2	0	0	0	5	5	0	0	0	0	0	0	3	22	153	0	0	0	0	0	0	-99	0	1	0	0	3	0	0	-9	4	-99	0	-99	-99
201501060010	2015	1	6	0	1	1	1	0	0	4	6	34.007712	68.714007	0	7	0	0	0	8	18	0	0	0	0	0	0	2	18	4	0	0	0	0	0	0	-99	0	0	0	0	0	0	0	1	3	-99	0	-99	-99
201501060011	2015	1	6	1	1	1	1	0	0	153	6	29.896111	69.251944	0	6	0	0	0	5	5	0	0	0	0	0	0	3	25	153	0	0	0	0	0	0	-99	0	0	0	0	0	0	0	0	4	-99	1	2	0
201501060015	2015	1	6	0	1	1	1	0	0	153	6	24.891115	67.143311	0	2	0	0	0	5	5	0	0	0	0	0	0	14	69	153	0	0	0	0	0	0	-99	0	2	0	0	1	0	0	-9	4	-99	0	-99	-99
201501060016	2015	1	6	0	1	1	1	0	0	95	10	33.303566	44.371773	0	3	0	0	0	6	16	0	0	0	0	0	0	14	74	95	0	0	0	0	0	0	-99	0	2	0	0	6	0	0	-9	4	-99	0	-99	-99
201501060017	2015	1	6	0	1	1	1	0	0	95	10	33.303566	44.371773	0	3	0	0	0	6	16	0	0	0	0	0	0	17	94	95	0	0	0	0	0	0	-99	0	1	0	0	4	0	0	-9	4	-99	0	-99	-99
201501060018	2015	1	6	0	1	1	1	0	0	95	10	33.100529	44.584492	1	3	0	0	0	6	16	0	0	0	0	0	0	14	67	95	0	0	0	0	0	0	-99	0	2	0	0	7	0	0	0	4	-99	0	-99	-99
201501060032	2015	1	6	0	1	1	1	0	0	195	11	12.591678	25.272219	0	2	0	0	0	5	5	0	0	0	0	0	0	7	47	422	0	0	0	0	0	0	5	0	2	0	2	0	0	0	0	4	-99	0	-99	-99
201501060033	2015	1	6	0	1	1	1	0	0	195	11	12.683231	22.563177	0	2	0	0	0	5	5	0	0	0	0	0	0	7	47	422	0	0	0	0	0	0	-99	0	0	0	0	0	0	0	1	3	-99	0	-99	-99
201501060034	2015	1	6	0	1	1	1	0	0	160	5	6.978004	124.387397	0	1	0	0	0	6	11	0	0	0	0	0	0	2	15	160	0	0	0	0	0	0	1	0	0	0	0	1	0	0	1	3	-99	0	-99	-99
201501060038	2015	1	6	0	1	1	1	0	0	4	6	34.165001	68.790285	0	7	0	0	0	8	18	0	0	0	0	0	0	16	0	4	0	0	0	0	0	0	-99	0	0	0	0	0	0	0	1	4	-99	0	-99	-99
201501060039	2015	1	6	0	1	1	1	0	0	4	6	34.165001	68.790285	0	9	0	0	0	13	0	0	0	0	0	0	0	8	49	4	0	0	0	0	0	0	-99	0	0	0	0	0	0	0	1	3	-99	0	-99	-99
201501060045	2015	1	6	0	0	1	1	1	0	147	11	4.699885	7.42277	0	2	0	0	0	5	5	0	0	0	0	0	0	14	84	147	0	0	0	0	0	0	-99	0	0	0	0	0	0	0	1	3	-99	0	-99	-99
201501070005	2015	1	7	0	1	1	1	0	0	69	8	43.019169	3.04942	0	2	0	0	0	5	5	0	0	0	0	0	0	15	86	69	0	0	0	0	0	0	-99	0	0	0	0	0	0	0	1	3	-99	0	-99	-99
201501070010	2015	1	7	0	1	1	1	0	0	95	10	33.057991	44.354839	0	3	0	0	0	6	16	0	0	0	0	0	0	14	74	95	0	0	0	0	0	0	-99	0	1	0	0	5	0	0	-9	4	-99	0	-99	-99
201501070012	2015	1	7	0	1	1	1	0	0	95	10	33.303566	44.371773	0	3	0	0	0	6	16	0	0	0	0	0	0	14	67	95	0	0	0	0	0	0	-99	0	5	0	0	10	0	0	-9	4	-99	0	-99	-99
201501070013	2015	1	7	0	1	1	1	0	0	95	10	33.303566	44.371773	0	3	0	0	0	6	16	0	0	0	0	0	0	14	79	95	0	0	0	0	0	0	-99	0	1	0	0	6	0	0	0	4	-99	0	-99	-99
201501070014	2015	1	7	0	1	1	0	1	0	95	10	33.669689	44.381317	0	2	0	0	0	5	5	0	0	0	0	0	0	4	36	95	0	0	0	0	0	0	-99	0	3	0	0	9	0	0	0	4	-99	0	-99	-99
201501070015	2015	1	7	0	1	1	1	0	0	160	5	7.885051	124.166209	0	2	0	0	0	5	5	0	0	0	0	0	0	2	19	160	0	0	0	0	0	0	-99	0	1	0	0	0	0	0	0	4	-99	0	-99	-99
201501070026	2015	1	7	0	1	1	1	0	0	4	6	33.305833	68.446944	0	3	0	0	0	6	16	0	0	0	0	0	0	3	23	4	0	0	0	0	0	0	-99	0	1	0	0	2	0	0	1	3	-99	0	-99	-99
201501070027	2015	1	7	0	1	1	1	0	0	4	6	32.727268	67.635903	0	1	0	0	0	6	16	0	0	0	0	0	0	17	94	4	0	0	0	0	0	0	-99	0	0	0	0	3	0	0	-9	4	-99	0	-99	-99
201501070030	2015	1	7	0	1	1	1	0	0	160	5	6.426872	122.011242	0	3	0	0	0	6	17	0	0	0	0	0	0	1	9	160	0	0	0	0	0	0	-99	0	0	0	0	1	0	0	-9	4	-99	0	-99	-99
201501070034	2015	1	7	0	1	1	0	1	0	4	6	32.938449	66.638056	0	3	0	0	0	6	16	0	0	0	0	0	0	4	34	4	0	0	0	0	0	0	-99	0	0	0	0	3	0	0	-9	4	-99	0	-99	-99
201501070041	2015	1	7	0	1	1	1	0	0	19	6	23.791275	90.418205	0	3	0	0	0	6	17	0	0	0	0	0	0	22	111	19	0	0	0	0	0	0	-99	0	0	0	0	0	0	0	0	4	-99	0	-99	-99
201501070044	2015	1	7	0	1	1	1	0	0	147	11	10.286653	11.163861	0	1	0	0	0	13	0	0	0	0	0	0	0	14	84	147	0	0	0	0	0	0	-99	0	0	0	0	1	0	0	1	3	-99	0	-99	-99
201501070081	2015	1	7	0	1	1	1	0	0	60	10	29.311707	30.838812	0	3	0	0	0	6	16	0	0	0	0	0	0	3	22	60	0	0	0	0	0	0	-99	0	0	0	0	1	0	0	-9	4	-99	0	-99	-99
201501070087	2015	1	7	0	1	1	1	0	0	153	6	32.209442	70.383537	0	3	0	0	0	6	17	0	0	0	0	0	0	20	0	153	0	0	0	0	0	0	-99	0	0	0	0	0	0	0	0	4	-99	0	-99	-99
201501070088	2015	1	7	0	1	1	1	0	0	153	6	34.744167	71.338333	0	2	0	0	0	5	5	0	0	0	0	0	0	14	67	153	0	0	0	0	0	0	-99	0	0	0	0	1	0	0	0	4	-99	0	-99	-99
201501070089	2015	1	7	0	1	1	1	0	0	160	5	9.1584	123.4996	0	1	0	0	0	6	15	0	0	0	0	0	0	2	14	160	0	0	0	0	0	0	-99	0	0	0	0	0	0	0	1	3	-99	0	-99	-99
201501070090	2015	1	7	0	1	1	1	0	0	19	6	23.791275	90.418205	0	3	0	0	0	6	17	0	0	0	0	0	0	19	99	19	0	0	0	0	0	0	-99	0	0	0	0	1	0	0	1	3	-99	0	-99	-99
201501070091	2015	1	7	0	1	1	1	0	0	153	6	24.891115	67.143311	0	2	0	0	0	5	5	0	0	0	0	0	0	15	87	153	0	0	0	0	0	0	2	0	1	0	0	1	0	0	0	4	-99	0	-99	-99
201501070093	2015	1	8	0	1	1	1	0	0	142	8	51.912067	4.349437	0	7	0	0	0	8	18	0	0	0	0	0	0	15	86	142	0	0	0	0	0	0	-99	0	0	0	0	0	0	0	0	4	-99	0	-99	-99
201501080002	2015	1	8	0	1	1	1	0	0	69	8	47.969057	0.203153	0	2	0	0	0	6	7	5	5	0	0	0	0	15	86	69	0	0	0	0	0	0	-99	0	0	0	0	0	0	0	1	3	-99	0	-99	-99
201501080003	2015	1	8	0	1	1	1	0	0	69	8	45.989461	4.72444	0	3	0	0	0	6	16	0	0	0	0	0	0	1	2	69	0	0	0	0	0	0	-99	0	0	0	0	0	0	0	1	3	-99	0	-99	-99
201501080014	2015	1	8	0	1	1	0	1	0	153	6	33.423333	70.368889	0	3	0	0	0	6	16	0	0	0	0	0	0	4	35	153	0	0	0	0	0	0	-99	0	4	0	0	3	0	0	1	4	-99	0	-99	-99
201501080018	2015	1	8	0	1	1	1	0	0	95	10	33.07835	44.254719	0	3	0	0	1	6	15	0	0	0	0	0	0	3	24	95	14	67	95	0	0	0	1	0	6	0	1	20	0	0	1	3	-99	0	-99	-99
201501080019	2015	1	8	0	1	1	1	0	0	95	10	33.303566	44.371773	0	3	0	0	0	6	15	0	0	0	0	0	0	14	67	95	0	0	0	0	0	0	-99	0	2	0	0	10	0	0	-9	4	-99	0	-99	-99
201501080030	2015	1	8	0	1	1	1	0	0	95	10	33.303566	44.371773	0	3	0	0	0	6	16	0	0	0	0	0	0	1	7	95	0	0	0	0	0	0	-99	0	0	0	0	9	0	0	-9	4	-99	0	-99	-99
201501080032	2015	1	8	0	1	1	1	0	0	95	10	33.303566	44.371773	0	3	0	0	1	6	13	0	0	0	0	0	0	15	86	95	0	0	0	0	0	0	1	0	9	0	1	16	0	0	1	3	-99	0	-99	-99
201501080040	2015	1	8	0	1	1	0	1	0	6	10	35.348841	7.47169	0	3	0	0	0	6	16	0	0	0	0	0	0	4	34	6	0	0	0	0	0	0	-99	0	0	0	0	1	0	0	-9	4	-99	0	-99	-99
201501080048	2015	1	8	0	1	1	1	0	0	228	10	15.325443	44.211895	0	3	0	0	1	6	13	0	0	0	0	0	0	1	6	228	0	0	0	0	0	0	-99	0	0	0	0	0	0	0	0	4	-99	0	-99	-99
201501080049	2015	1	8	0	1	1	1	0	0	228	10	13.985013	45.558479	0	2	0	0	0	5	5	0	0	0	0	0	0	2	20	228	0	0	0	0	0	0	-99	0	1	0	0	0	0	0	0	4	-99	0	-99	-99
201501080051	2015	1	8	0	1	1	1	0	0	160	5	14.694419	120.538736	1	1	0	0	0	5	3	0	0	0	0	0	0	10	56	160	0	0	0	0	0	0	1	0	1	0	0	0	0	0	0	4	-99	0	-99	-99
201501080052	2015	1	8	0	1	1	1	0	0	153	6	24.891115	67.143311	0	2	0	0	0	5	5	0	0	0	0	0	0	14	84	153	0	0	0	0	0	0	-99	0	1	0	0	0	0	0	0	4	-99	0	-99	-99
201501080053	2015	1	8	0	1	1	1	0	0	186	6	9.816667	80.2	0	3	0	0	0	6	7	0	0	0	0	0	0	14	76	186	0	0	0	0	0	0	2	0	0	0	0	0	0	0	1	3	-99	0	-99	-99
201501080054	2015	1	8	0	1	1	1	0	0	186	6	8.724741	80.377	0	3	0	0	0	6	7	0	0	0	0	0	0	8	49	186	0	0	0	0	0	0	-99	0	0	0	0	0	0	0	-9	4	-99	0	-99	-99
201501080055	2015	1	8	0	1	1	1	0	0	186	6	8.757816	80.487907	0	3	0	0	0	6	7	0	0	0	0	0	0	20	0	186	0	0	0	0	0	0	-99	0	0	0	0	0	0	0	0	4	-99	0	-99	-99
201501080056	2015	1	8	0	1	1	1	0	0	4	6	33.305667	62.156307	0	1	0	0	0	5	5	0	0	0	0	0	0	2	18	4	0	0	0	0	0	0	-99	0	0	0	0	0	0	0	1	3	-99	0	-99	-99
201501080057	2015	1	8	0	1	1	1	0	0	603	8	54.607712	-5.95621	0	3	0	0	0	6	9	0	0	0	0	0	0	3	25	233	0	0	0	0	0	0	-99	0	0	0	0	0	0	0	0	4	-99	0	-99	-99
201501080058	2015	1	8	0	1	1	1	0	0	155	10	31.784838	35.224613	0	2	0	0	0	9	23	0	0	0	0	0	0	14	69	97	0	0	0	0	0	0	1	0	0	0	0	1	0	0	0	4	-99	0	-99	-99
201501080062	2015	1	8	0	1	1	1	0	0	19	6	23.791275	90.418205	0	3	0	0	0	6	17	0	0	0	0	0	0	2	14	19	0	0	0	0	0	0	2	0	0	0	0	0	0	0	-9	4	-99	0	-99	-99
201501080064	2015	1	8	0	1	1	1	0	0	19	6	22.945389	91.249391	0	7	0	0	0	8	20	0	0	0	0	0	0	2	14	19	0	0	0	0	0	0	-99	0	0	0	0	0	0	0	1	3	-99	0	-99	-99
201501080068	2015	1	8	0	1	1	1	0	0	182	11	2.059819	45.326115	0	3	0	0	0	6	8	0	0	0	0	0	0	14	67	182	0	0	0	0	0	0	-99	0	2	0	0	3	0	0	0	4	-99	0	-99	-99
201501080072	2015	1	8	0	1	1	1	0	0	19	6	22.943681	90.83659	0	1	0	0	0	9	21	0	0	0	0	0	0	22	109	19	0	0	0	0	0	0	-99	0	1	0	0	2	0	0	-9	4	-99	0	-99	-99
201501080074	2015	1	8	0	1	1	1	0	0	153	6	24.891115	67.143311	0	2	0	0	0	5	5	0	0	0	0	0	0	3	25	153	0	0	0	0	0	0	-99	0	2	0	0	0	0	0	0	4	-99	0	-99	-99
201501080085	2015	1	8	0	1	1	1	0	0	19	6	22.341896	91.815117	0	3	0	0	0	6	17	0	0	0	0	0	0	19	105	19	0	0	0	0	0	0	-99	0	0	0	0	1	0	0	-9	4	-99	0	-99	-99
201501080090	2015	1	8	0	1	1	1	0	0	69	8	45.692341	5.908998	0	7	0	0	0	8	18	0	0	0	0	0	0	15	86	69	0	0	0	0	0	0	-99	0	0	0	0	0	0	0	1	3	-99	0	-99	-99
201501080091	2015	1	8	0	1	1	1	0	0	69	8	43.949268	2.211335	0	2	0	0	0	5	5	0	0	0	0	0	0	15	86	69	0	0	0	0	0	0	-99	0	0	0	0	0	0	0	1	3	-99	0	-99	-99
201501090006	2015	1	9	0	1	1	1	0	0	123	11	18.442701	1.411332	0	3	0	0	0	6	16	0	0	0	0	0	0	7	47	422	0	0	0	0	0	0	-99	0	0	0	0	7	0	0	1	3	-99	0	-99	-99
201501090007	2015	1	9	0	1	1	1	0	0	95	10	34.881348	44.62513	0	3	0	0	0	6	29	0	0	0	0	0	0	3	25	95	0	0	0	0	0	0	-99	0	0	0	0	1	0	0	1	3	-99	0	-99	-99
201501090008	2015	1	9	0	1	1	1	0	0	95	10	33.303566	44.371773	0	3	0	0	0	6	16	0	0	0	0	0	0	1	7	95	0	0	0	0	0	0	-99	0	1	0	0	5	0	0	-9	4	-99	0	-99	-99
201501090009	2015	1	9	0	1	1	1	0	0	95	10	33.303566	44.371773	0	3	0	0	0	6	16	0	0	0	0	0	0	14	67	95	0	0	0	0	0	0	-99	0	2	0	0	7	0	0	-9	4	-99	0	-99	-99
201501090010	2015	1	9	0	1	1	1	0	0	95	10	33.303566	44.371773	0	3	0	0	0	6	16	0	0	0	0	0	0	1	2	95	0	0	0	0	0	0	-99	0	2	0	0	9	0	0	-9	4	-99	0	-99	-99
201501090011	2015	1	9	0	1	1	1	0	0	95	10	34.880926	44.620868	0	2	0	0	0	5	2	0	0	0	0	0	0	14	65	95	0	0	0	0	0	0	-99	0	0	0	0	2	0	0	0	4	-99	0	-99	-99
201501090020	2015	1	9	0	1	1	0	1	0	153	6	32.901089	69.749405	0	3	0	0	0	6	11	0	0	0	0	0	0	4	27	153	0	0	0	0	0	0	-99	0	8	0	8	0	0	0	-9	4	-99	0	-99	-99
201501090021	2015	1	9	0	1	1	1	0	0	153	6	33.747722	70.963302	0	3	0	0	0	6	11	0	0	0	0	0	0	15	86	153	4	34	153	0	0	0	-99	0	1	0	0	4	0	0	1	3	-99	0	-99	-99
201501090033	2015	1	9	0	1	1	1	0	1	214	9	47.579815	34.384754	0	3	0	0	0	6	9	0	0	0	0	0	0	1	0	214	0	0	0	0	0	0	1	0	0	0	0	0	0	0	1	3	-99	0	-99	-99
201501090034	2015	1	9	0	1	1	1	0	1	214	9	48.291861	25.936107	0	3	0	0	0	6	9	0	0	0	0	0	0	20	0	214	0	0	0	0	0	0	1	0	0	0	0	0	0	0	0	4	-99	0	-99	-99
201501090035	2015	1	9	0	1	1	1	0	1	214	9	48.922633	24.711117	0	3	0	0	0	6	9	0	0	0	0	0	0	20	0	214	0	0	0	0	0	0	1	0	0	0	0	0	0	0	0	4	-99	0	-99	-99
201501090037	2015	1	9	0	1	1	1	0	0	60	10	30.135777	31.26964	0	2	0	0	0	5	5	0	0	0	0	0	0	3	23	60	0	0	0	0	0	0	-99	0	0	0	0	9	0	0	1	3	-99	0	-99	-99
201501090038	2015	1	11	0	1	1	1	0	0	60	10	30.022924	31.185192	0	2	0	0	0	5	5	0	0	0	0	0	0	3	24	60	0	0	0	0	0	0	-99	0	0	0	0	2	0	0	1	3	-99	0	-99	-99
201501090039	2015	1	9	0	1	1	1	0	0	153	6	27.706584	68.848197	0	2	0	0	0	5	5	0	0	0	0	0	0	4	34	153	0	0	0	0	0	0	-99	0	1	0	0	0	0	0	0	4	-99	0	-99	-99
201501090040	2015	1	9	0	1	1	1	0	0	19	6	23.791275	90.418205	0	3	0	0	0	6	17	0	0	0	0	0	0	2	18	19	0	0	0	0	0	0	-99	0	0	0	0	1	0	0	1	3	-99	0	-99	-99
201501090041	2015	1	9	0	1	1	1	0	0	153	6	24.891115	67.143311	0	2	0	0	0	5	5	0	0	0	0	0	0	22	109	153	0	0	0	0	0	0	-99	0	1	0	0	2	0	0	-9	4	-99	0	-99	-99
201501090042	2015	1	9	0	1	1	1	0	0	153	6	34.80508	71.46783	0	3	0	0	0	6	12	0	0	0	0	0	0	14	68	153	0	0	0	0	0	0	-99	0	1	0	0	0	0	0	0	4	-99	0	-99	-99
201501090084	2015	1	9	0	1	1	1	0	0	155	10	31.502407	34.459743	0	3	0	0	0	6	12	0	0	0	0	0	0	1	3	155	0	0	0	0	0	0	-99	0	0	0	0	0	0	0	1	3	-99	0	-99	-99
201501090087	2015	1	9	0	1	1	1	0	0	19	6	23.01606	91.397434	0	3	0	0	0	6	17	0	0	0	0	0	0	2	18	19	0	0	0	0	0	0	-99	0	0	0	0	2	0	0	1	3	-99	0	-99	-99
201501090089	2015	1	9	0	1	1	1	0	0	19	6	23.791275	90.418205	0	7	0	0	0	8	20	0	0	0	0	0	0	22	109	19	0	0	0	0	0	0	-99	0	0	0	0	0	0	0	1	3	-99	0	-99	-99
201501090090	2015	1	9	0	1	1	1	0	0	19	6	23.791275	90.418205	0	3	0	0	0	6	17	0	0	0	0	0	0	3	25	19	14	67	19	0	0	0	-99	0	0	0	0	4	0	0	-9	4	-99	0	-99	-99
201501090091	2015	1	7	0	1	1	1	0	0	153	6	34.158333	71.773333	0	3	0	0	0	6	16	0	0	0	0	0	0	19	100	153	0	0	0	0	0	0	-99	0	0	0	0	0	0	0	0	4	-99	0	-99	-99
201501090092	2015	1	9	0	1	1	1	0	0	92	6	25.508945	92.996861	0	1	0	0	0	5	5	0	0	0	0	0	0	12	61	92	0	0	0	0	0	0	-99	0	1	0	0	0	0	0	0	4	-99	0	-99	-99
201501090093	2015	1	9	0	1	1	1	0	0	95	10	33.303566	44.371773	0	3	0	0	0	6	16	0	0	0	0	0	0	14	67	95	0	0	0	0	0	0	-99	0	0	0	0	3	0	0	-9	4	-99	0	-99	-99
201501090094	2015	1	9	0	1	1	0	1	0	153	6	33.741283	70.984739	0	3	0	0	0	6	16	0	0	0	0	0	0	4	29	153	0	0	0	0	0	0	-99	0	4	0	0	2	0	0	1	4	-99	0	-99	-99
201501090095	2015	1	9	0	1	1	1	0	0	160	5	14.420209	120.939674	0	1	0	0	0	5	5	0	0	0	0	0	0	2	15	160	0	0	0	0	0	0	-99	0	1	0	0	0	0	0	0	4	-99	0	-99	-99
201501090097	2015	1	9	0	1	1	1	0	0	69	8	47.792551	1.065343	0	2	0	0	0	5	5	0	0	0	0	0	0	15	86	69	0	0	0	0	0	0	-99	0	0	0	0	0	0	0	1	3	-99	0	-99	-99
201501090098	2015	1	9	0	1	1	1	0	0	69	8	49.376636	3.32342	0	2	0	0	0	5	5	0	0	0	0	0	0	15	86	69	0	0	0	0	0	0	-99	0	0	0	0	0	0	0	1	3	-99	0	-99	-99
201501100001	2015	1	10	0	1	1	1	0	1	209	10	41.106178	28.689863	0	3	0	0	0	6	17	0	0	0	0	0	0	1	7	209	0	0	0	0	0	0	-99	0	0	0	0	0	0	0	0	4	-99	0	-99	-99
201501100002	2015	1	10	0	1	1	1	0	1	209	10	41.106178	28.689863	0	3	0	0	0	6	17	0	0	0	0	0	0	1	7	209	0	0	0	0	0	0	-99	0	0	0	0	0	0	0	0	4	-99	0	-99	-99
201501100006	2015	1	10	0	1	1	1	0	0	95	10	33.303566	44.371773	0	3	0	0	0	6	16	0	0	0	0	0	0	14	67	95	0	0	0	0	0	0	-99	0	1	0	0	2	0	0	-9	4	-99	0	-99	-99
201501100010	2015	1	10	1	1	1	1	0	0	113	10	32.069286	20.151144	0	6	0	0	0	13	0	0	0	0	0	0	0	10	53	113	0	0	0	0	0	0	-99	0	0	0	0	0	0	0	0	4	-99	1	1	0
201501100023	2015	1	10	0	1	1	1	0	0	153	6	26.026148	63.715561	0	3	0	0	0	6	16	0	0	0	0	0	0	1	12	153	0	0	0	0	0	0	-99	0	0	0	0	1	0	0	-9	4	-99	0	-99	-99
201501100057	2015	1	10	0	1	1	1	0	0	182	11	11.274796	49.179657	0	2	0	0	0	5	5	0	0	0	0	0	0	1	2	182	0	0	0	0	0	0	-99	0	0	0	0	2	0	0	1	3	-99	0	-99	-99
201501100060	2015	1	10	0	1	1	1	0	0	153	6	28.644878	68.406381	0	3	0	0	0	6	16	0	0	0	0	0	0	21	106	153	0	0	0	0	0	0	-99	0	0	0	0	0	0	0	1	4	-99	0	-99	-99
201501100061	2015	1	10	0	1	1	0	1	0	153	6	25.999413	63.047451	0	3	0	0	0	6	16	0	0	0	0	0	0	4	34	153	0	0	0	0	0	0	-99	0	0	0	0	1	0	0	0	4	-99	0	-99	-99
201501100064	2015	1	10	0	1	1	1	0	0	153	6	33.976307	71.437157	0	2	0	0	0	5	5	0	0	0	0	0	0	1	6	153	0	0	0	0	0	0	2	0	1	0	0	0	0	0	0	4	-99	0	-99	-99
201501100065	2015	1	10	0	1	1	1	0	0	153	6	33.962677	71.731377	0	1	0	0	0	6	16	0	0	0	0	0	0	17	94	153	0	0	0	0	0	0	-99	0	0	0	0	0	0	0	1	3	-99	0	-99	-99
201501100066	2015	1	10	0	1	1	1	0	0	153	6	24.891115	67.143311	0	2	0	0	0	5	5	0	0	0	0	0	0	1	6	153	0	0	0	0	0	0	-99	0	1	0	0	0	0	0	0	4	-99	0	-99	-99
201501100067	2015	1	10	0	1	1	1	0	0	153	6	24.891115	67.143311	0	2	0	0	0	5	5	0	0	0	0	0	0	14	77	153	0	0	0	0	0	0	-99	0	1	0	0	0	0	0	0	4	-99	0	-99	-99
201501100069	2015	1	10	0	1	1	1	0	0	153	6	24.891115	67.143311	0	2	0	0	0	5	5	0	0	0	0	0	0	15	87	153	0	0	0	0	0	0	2	0	1	0	0	0	0	0	0	4	-99	0	-99	-99
201501100070	2015	1	10	0	1	1	1	0	0	19	6	23.791275	90.418205	0	3	0	0	0	6	17	0	0	0	0	0	0	22	110	19	0	0	0	0	0	0	-99	0	0	0	0	0	0	0	-9	4	-99	0	-99	-99
201501100071	2015	1	10	0	1	1	1	0	0	92	6	22.551729	88.352341	0	3	0	0	0	6	17	0	0	0	0	0	0	19	100	92	0	0	0	0	0	0	-99	0	0	0	0	3	0	0	-9	4	-99	0	-99	-99
201501100073	2015	1	10	0	1	1	1	0	0	19	6	23.791275	90.418205	0	3	0	0	0	6	17	0	0	0	0	0	0	10	53	19	0	0	0	0	0	0	-99	0	0	0	0	0	0	0	-9	4	-99	0	-99	-99
201501100074	2015	1	10	0	1	1	0	1	1	99	11	4.774444	-7.529444	0	2	0	0	0	5	5	0	0	0	0	0	0	4	27	99	0	0	0	0	0	0	-99	0	3	0	1	0	0	0	-9	4	-99	0	-99	-99
201501100075	2015	1	10	1	1	1	0	1	1	99	11	4.926617	-7.494947	0	6	2	0	0	5	5	0	0	0	0	0	0	4	34	99	0	0	0	0	0	0	15	0	0	0	0	0	0	0	-9	4	-99	1	1	0
201501100076	2015	1	10	0	1	1	1	0	0	153	6	31.414515	73.076657	0	2	0	0	0	5	5	0	0	0	0	0	0	22	109	153	0	0	0	0	0	0	-99	0	2	0	0	0	0	0	1	3	-99	0	-99	-99
201501100077	2015	1	10	0	1	1	1	0	0	4	6	34.417122	70.449593	0	1	0	0	0	5	2	0	0	0	0	0	0	2	14	4	0	0	0	0	0	0	-99	0	1	0	0	0	0	0	-9	4	-99	0	-99	-99
201501100081	2015	1	10	0	1	1	1	0	0	4	6	33.598633	69.228996	0	3	0	0	1	6	15	0	0	0	0	0	0	20	0	0	0	0	0	0	0	0	1	1	0	0	0	0	0	0	0	4	-99	0	-99	-99
201501100082	2015	1	10	0	1	1	1	0	0	95	10	33.303566	44.371773	0	3	0	0	0	6	16	0	0	0	0	0	0	14	74	95	0	0	0	0	0	0	-99	0	5	0	0	11	0	0	-9	4	-99	0	-99	-99
201501100083	2015	1	10	0	1	1	1	0	0	95	10	33.100529	44.584492	0	3	0	0	0	6	16	0	0	0	0	0	0	14	74	95	0	0	0	0	0	0	-99	0	3	0	0	9	0	0	-9	4	-99	0	-99	-99
201501100089	2015	1	10	0	1	1	1	0	0	60	10	31.126646	33.800865	0	2	0	0	0	5	4	0	0	0	0	0	0	3	25	60	0	0	0	0	0	0	-99	0	0	0	0	1	0	0	0	4	-99	0	-99	-99
201501100090	2015	1	10	0	1	1	1	0	0	19	6	180	180	0	7	0	0	0	8	19	0	0	0	0	0	0	2	18	19	0	0	0	0	0	0	-99	0	0	0	0	0	0	0	1	3	-99	0	-99	-99
201501100091	2015	1	10	0	1	1	1	1	0	155	10	31.522561	34.453593	0	3	0	0	0	6	16	0	0	0	0	0	0	2	18	155	0	0	0	0	0	0	-99	0	0	0	0	0	0	0	1	3	-99	0	-99	-99
201501100092	2015	1	10	0	1	1	1	0	0	19	6	24.579343	88.267296	0	1	0	0	0	6	17	0	0	0	0	0	0	2	14	19	0	0	0	0	0	0	-99	0	0	0	0	0	0	0	-9	4	-99	0	-99	-99
201501100093	2015	1	10	0	1	1	1	0	0	92	6	24.479971	87.86619	0	3	0	0	0	6	17	0	0	0	0	0	0	8	49	92	3	22	92	0	0	0	8	0	0	0	0	1	0	0	-9	4	-99	0	-99	-99
201501100094	2015	1	10	0	1	1	1	0	0	19	6	23.791275	90.418205	0	3	0	0	0	6	17	0	0	0	0	0	0	14	74	19	0	0	0	0	0	0	-99	0	0	0	0	1	0	0	-9	4	-99	0	-99	-99
201501100099	2015	1	10	0	1	1	1	0	0	19	6	24.591206	88.277149	0	7	0	0	0	8	19	0	0	0	0	0	0	1	7	19	0	0	0	0	0	0	-99	0	0	0	0	2	0	0	1	3	-99	0	-99	-99
201501100100	2015	1	10	0	1	1	1	0	0	19	6	23.791275	90.418205	0	3	0	0	0	6	17	0	0	0	0	0	0	1	7	19	0	0	0	0	0	0	-99	0	0	0	0	1	0	0	1	3	-99	0	-99	-99
201501100107	2015	1	10	0	1	1	1	0	0	1004	11	6.60308	29.974054	0	1	0	0	0	5	5	0	0	0	0	0	0	2	18	1004	0	0	0	0	0	0	-99	0	0	0	0	0	0	0	-9	4	-99	0	-99	-99
201501100111	2015	1	11	0	1	1	1	0	0	153	6	34.744167	71.338333	0	3	0	0	0	6	12	0	0	0	0	0	0	20	0	153	0	0	0	0	0	0	-99	0	0	0	0	0	0	0	0	4	-99	0	-99	-99
201501100112	2015	1	10	0	1	1	1	0	0	4	6	34.007712	68.714007	0	7	0	0	0	8	18	0	0	0	0	0	0	2	18	4	0	0	0	0	0	0	-99	0	0	0	0	0	0	0	1	3	-99	0	-99	-99
201501100113	2015	1	10	0	1	1	1	0	0	153	6	33.91424	70.882043	0	7	0	0	0	8	18	0	0	0	0	0	0	4	34	153	0	0	0	0	0	0	-99	0	0	0	0	0	0	0	1	3	-99	0	-99	-99
201501100116	2015	1	10	0	1	1	1	0	0	92	6	27.900297	78.08026	0	1	0	0	0	5	5	0	0	0	0	0	0	14	84	92	0	0	0	0	0	0	2	0	1	0	0	0	0	0	1	3	-99	0	-99	-99
201501100119	2015	1	10	0	1	1	1	0	0	69	8	42.017023	9.404009	0	2	0	0	0	5	4	0	0	0	0	0	0	1	7	238	0	0	0	0	0	0	-99	0	0	0	0	0	0	0	1	3	-99	0	-99	-99
201501110002	2015	1	11	0	1	1	1	0	0	75	8	53.556487	9.910117	0	7	0	0	0	8	19	0	0	0	0	0	0	10	53	75	0	0	0	0	0	0	2	2	0	0	0	0	0	0	1	3	-99	0	-99	-99
201501110004	2015	1	11	0	1	1	1	0	0	95	10	33.303566	44.371773	0	3	0	0	0	6	15	0	0	0	0	0	0	8	48	95	1	7	95	0	0	0	-99	0	1	0	0	5	0	0	1	3	-99	0	-99	-99
201501110005	2015	1	11	0	1	1	1	0	0	95	10	33.303566	44.371773	0	3	0	0	0	6	15	0	0	0	0	0	0	2	18	95	0	0	0	0	0	0	-99	0	1	0	0	1	0	0	1	3	-99	0	-99	-99
201501110007	2015	1	11	0	1	1	1	0	0	95	10	33.057991	44.354839	0	3	0	0	0	6	16	0	0	0	0	0	0	14	74	95	0	0	0	0	0	0	-99	0	1	0	0	2	0	0	-9	4	-99	0	-99	-99
201501110008	2015	1	11	0	1	1	1	0	0	95	10	34.881348	44.62513	0	3	0	0	0	6	16	0	0	0	0	0	0	20	0	95	0	0	0	0	0	0	-99	0	0	0	0	0	0	0	-9	4	-99	0	-99	-99
201501110013	2015	1	11	0	1	1	1	0	0	95	10	33.303566	44.371773	0	2	0	0	0	5	5	0	0	0	0	0	0	3	24	95	0	0	0	0	0	0	-99	0	2	0	0	4	0	0	0	4	-99	0	-99	-99
201501110016	2015	1	11	1	1	1	1	0	0	95	10	180	180	0	6	0	0	0	5	5	0	0	0	0	0	0	17	94	95	0	0	0	0	0	0	-99	0	2	0	0	0	0	0	0	4	-99	1	2	0
201501110027	2015	1	11	0	1	1	1	0	0	4	6	34.279105	62.218857	1	2	0	0	0	5	5	0	0	0	0	0	0	7	47	422	0	0	0	0	0	0	1	0	0	0	0	0	0	0	-9	4	-99	0	-99	-99
201501110048	2015	1	11	0	1	1	0	1	0	60	10	31.250196	34.24128	0	3	0	0	0	6	16	0	0	0	0	0	0	4	27	60	0	0	0	0	0	0	-99	0	0	0	0	0	0	0	1	3	-99	0	-99	-99
201501110049	2015	1	11	0	0	1	1	1	0	147	11	4.74159	7.08488	0	3	0	0	0	6	28	0	0	0	0	0	0	14	84	147	0	0	0	0	0	0	-99	0	0	0	0	0	0	0	1	3	-99	0	-99	-99
201501110050	2015	1	11	0	1	1	1	0	0	147	11	6.333346	8.1	0	9	0	0	0	13	0	0	0	0	0	0	0	2	21	147	14	84	147	0	0	0	-99	0	0	0	0	0	0	0	0	4	-99	0	-99	-99
201501110051	2015	1	11	0	1	1	1	0	0	147	11	6.535695	8.023253	0	2	0	0	0	5	5	0	0	0	0	0	0	14	84	147	0	0	0	0	0	0	-99	0	0	0	0	0	0	0	1	3	-99	0	-99	-99
201501110052	2015	1	11	0	1	1	1	0	0	147	11	6.535695	8.023253	0	2	0	0	0	5	5	0	0	0	0	0	0	14	84	147	0	0	0	0	0	0	-99	0	0	0	0	0	0	0	1	3	-99	0	-99	-99
201501110054	2015	1	11	0	1	1	1	0	0	19	6	22.341896	91.815117	0	3	0	0	0	6	17	0	0	0	0	0	0	14	74	19	0	0	0	0	0	0	-99	0	0	0	0	0	0	0	1	3	-99	0	-99	-99
201501110057	2015	1	11	0	1	1	1	0	1	19	6	23.791275	90.418205	0	3	0	0	0	6	16	0	0	0	0	0	0	2	14	19	0	0	0	0	0	0	-99	0	0	0	0	0	0	0	0	4	-99	0	-99	-99
201501110058	2015	1	11	0	1	1	1	0	1	19	6	23.791275	90.418205	0	3	0	0	0	6	16	0	0	0	0	0	0	2	14	19	0	0	0	0	0	0	-99	0	0	0	0	0	0	0	0	4	-99	0	-99	-99
201501110059	2015	1	11	0	1	1	1	0	0	19	6	23.791275	90.418205	0	1	0	0	0	5	5	0	0	0	0	0	0	22	109	19	0	0	0	0	0	0	-99	0	0	0	0	0	0	0	-9	4	-99	0	-99	-99
201501110060	2015	1	11	0	1	1	1	0	0	19	6	23.791275	90.418205	0	7	0	0	0	8	19	0	0	0	0	0	0	19	99	19	0	0	0	0	0	0	-99	0	0	0	0	1	0	0	1	3	-99	0	-99	-99
201501110061	2015	1	11	0	1	1	1	0	0	78	8	37.99749	23.762728	0	7	0	0	0	8	19	0	0	0	0	0	0	14	84	78	0	0	0	0	0	0	-99	0	0	0	0	0	0	0	0	4	-99	0	-99	-99
201501110067	2015	1	11	0	1	1	1	0	0	92	6	12.171542	75.277189	0	7	0	0	0	8	18	0	0	0	0	0	0	22	109	92	0	0	0	0	0	0	-99	0	0	0	0	0	0	0	1	3	-99	0	-99	-99
201501110068	2015	1	11	0	1	1	1	0	0	214	9	47.981647	37.762325	0	3	0	0	0	6	11	0	0	0	0	0	0	1	10	214	0	0	0	0	0	0	-99	0	0	0	0	0	0	0	1	4	-99	0	-99	-99
201501110112	2015	1	11	0	1	1	1	0	0	69	8	46.580224	0.340375	0	7	0	0	0	8	18	0	0	0	0	0	0	15	86	69	0	0	0	0	0	0	-99	0	0	0	0	0	0	0	1	3	-99	0	-99	-99
201501120001	2015	1	12	0	1	1	1	0	0	95	10	33.303566	44.371773	0	3	0	0	0	6	16	0	0	0	0	0	0	14	74	95	0	0	0	0	0	0	-99	0	2	0	0	8	0	0	-9	4	-99	0	-99	-99
201501120002	2015	1	12	0	1	1	1	0	0	95	10	33.303566	44.371773	0	2	0	0	0	5	5	0	0	0	0	0	0	2	18	95	0	0	0	0	0	0	-99	0	1	0	0	0	0	0	1	3	-99	0	-99	-99
201501120006	2015	1	12	0	1	1	1	0	0	95	10	34.208416	43.890713	0	3	0	0	1	6	15	0	0	0	0	0	0	17	94	95	4	34	95	0	0	0	1	0	13	0	1	18	0	0	1	3	-99	0	-99	-99
201501120007	2015	1	12	0	1	1	1	0	0	95	10	33.303566	44.371773	0	3	0	0	0	6	16	0	0	0	0	0	0	19	99	95	0	0	0	0	0	0	-99	0	2	0	0	9	0	0	1	3	-99	0	-99	-99
201501120008	2015	1	12	0	1	1	1	0	0	95	10	33.303566	44.371773	0	3	0	0	0	6	16	0	0	0	0	0	0	15	86	95	0	0	0	0	0	0	-99	0	1	0	0	5	0	0	-9	4	-99	0	-99	-99
201501120014	2015	1	12	0	1	1	1	0	0	153	6	29.03533	69.158797	0	3	0	0	0	6	8	0	0	0	0	0	0	14	72	153	0	0	0	0	0	0	-99	0	0	0	0	1	0	0	0	4	-99	0	-99	-99
201501120025	2015	1	11	0	1	1	1	0	0	4	6	33.305667	62.156307	0	1	0	0	0	6	8	0	0	0	0	0	0	2	20	4	0	0	0	0	0	0	-99	0	0	0	0	1	0	0	1	3	-99	0	-99	-99
201501120026	2015	1	12	0	1	1	1	0	0	4	6	32.176111	66.5125	0	1	0	0	0	6	12	0	0	0	0	0	0	3	25	4	0	0	0	0	0	0	-99	0	2	0	0	1	0	0	1	3	-99	0	-99	-99
201501120029	2015	1	12	0	1	1	1	0	0	4	6	31.47771	64.289821	0	1	0	0	0	5	5	0	0	0	0	0	0	14	68	4	0	0	0	0	0	0	-99	0	1	0	0	0	0	0	0	4	-99	0	-99	-99
201501120031	2015	1	12	0	1	1	1	0	0	4	6	33.335258	69.928467	0	1	0	0	0	6	16	0	0	0	0	0	0	3	25	4	0	0	0	0	0	0	-99	0	1	0	0	0	0	0	-9	4	-99	0	-99	-99
201501120034	2015	1	12	0	1	1	0	1	0	4	6	34.195751	70.786385	0	3	0	0	0	6	16	0	0	0	0	0	0	4	34	4	0	0	0	0	0	0	-99	0	2	0	0	0	0	0	-9	4	-99	0	-99	-99
201501120060	2015	1	12	0	1	1	1	0	0	153	6	24.891115	67.143311	0	2	0	0	0	5	3	0	0	0	0	0	0	22	109	153	0	0	0	0	0	0	-99	0	1	0	0	0	0	0	0	4	-99	0	-99	-99
201501120063	2015	1	12	1	1	1	1	0	0	147	11	4.9073	6.301048	0	6	0	0	0	5	5	0	0	0	0	0	0	14	84	147	0	0	0	0	0	0	-99	0	0	0	0	0	0	0	0	4	-99	1	2	0
201501120071	2015	1	12	0	1	1	1	0	0	19	6	23.791275	90.418205	0	3	0	0	0	6	17	0	0	0	0	0	0	8	49	19	0	0	0	0	0	0	-99	0	0	0	0	1	0	0	-9	4	-99	0	-99	-99
201501120072	2015	1	12	0	1	1	1	0	0	19	6	23.791275	90.418205	0	3	0	0	0	6	17	0	0	0	0	0	0	8	49	19	0	0	0	0	0	0	-99	0	0	0	0	2	0	0	-9	4	-99	0	-99	-99
201501120074	2015	1	12	0	1	1	1	0	0	19	6	23.791275	90.418205	0	3	0	0	0	6	17	0	0	0	0	0	0	20	0	19	0	0	0	0	0	0	-99	0	0	0	0	0	0	0	-9	4	-99	0	-99	-99
201501120075	2015	1	12	0	1	1	1	0	0	19	6	23.791275	90.418205	0	3	0	0	0	6	17	0	0	0	0	0	0	20	0	19	0	0	0	0	0	0	-99	0	0	0	0	0	0	0	-9	4	-99	0	-99	-99
201501120077	2015	1	12	0	1	1	1	0	0	19	6	23.791275	90.418205	0	3	0	0	0	6	16	0	0	0	0	0	0	14	68	19	0	0	0	0	0	0	-99	0	0	0	0	1	0	0	-9	4	-99	0	-99	-99
201501120079	2015	1	12	0	1	1	1	0	0	19	6	23.791275	90.418205	0	3	0	0	0	6	17	0	0	0	0	0	0	22	109	19	0	0	0	0	0	0	-99	0	0	0	0	0	0	0	-9	4	-99	0	-99	-99
201501120080	2015	1	12	0	1	1	1	0	0	19	6	24.579343	88.267296	0	3	0	0	0	6	17	0	0	0	0	0	0	2	14	19	0	0	0	0	0	0	-99	0	0	0	0	0	0	0	0	4	-99	0	-99	-99
201501120081	2015	1	12	0	1	1	1	0	0	19	6	23.791275	90.418205	0	3	0	0	0	6	17	0	0	0	0	0	0	22	111	19	0	0	0	0	0	0	-99	0	0	0	0	0	0	0	-9	4	-99	0	-99	-99
201501120082	2015	1	12	0	1	1	1	0	0	92	6	23.178725	75.78491	0	1	0	0	0	2	0	0	0	0	0	0	0	22	109	92	0	0	0	0	0	0	2	0	0	0	0	3	0	0	0	4	-99	0	-99	-99
201501120087	2015	1	12	0	1	1	1	0	0	60	10	31.212225	34.117065	0	2	0	0	0	5	5	0	0	0	0	0	0	3	22	60	0	0	0	0	0	0	-99	0	0	0	0	0	0	0	0	4	-99	0	-99	-99
201501120088	2015	1	12	0	1	1	1	0	0	92	6	12.251801	75.298859	0	9	0	0	0	13	0	0	0	0	0	0	0	14	84	92	0	0	0	0	0	0	-99	0	0	0	0	0	0	0	-9	4	-99	0	-99	-99
201501130001	2015	1	13	0	1	1	1	0	0	95	10	33.303566	44.371773	0	3	0	0	0	6	16	0	0	0	0	0	0	14	74	95	0	0	0	0	0	0	-99	0	1	0	0	7	0	0	-9	4	-99	0	-99	-99
201501130004	2015	1	13	0	1	1	1	0	0	95	10	35.45211	44.375465	0	2	0	0	0	5	5	0	0	0	0	0	0	3	23	95	0	0	0	0	0	0	2	0	1	0	1	4	0	1	0	4	-99	0	-99	-99
201501130006	2015	1	13	0	1	1	1	0	0	153	6	33.695975	70.336069	0	3	0	0	0	6	8	0	0	0	0	0	0	3	23	153	0	0	0	0	0	0	-99	0	2	0	0	3	0	0	1	4	-99	0	-99	-99
201501130007	2015	1	13	0	1	1	0	1	0	113	10	32.069286	20.151144	0	3	0	0	1	6	15	0	0	0	0	0	0	4	36	113	0	0	0	0	0	0	1	0	4	0	1	4	0	0	0	4	-99	0	-99	-99
201501130008	2015	1	13	0	1	1	1	0	0	153	6	29.803965	66.85099	0	2	0	0	0	5	5	0	0	0	0	0	0	3	25	153	0	0	0	0	0	0	-99	0	1	0	0	1	0	0	0	4	-99	0	-99	-99
201501130013	2015	1	13	0	1	1	1	0	0	153	6	28.373562	67.565649	0	2	0	0	0	5	5	0	0	0	0	0	0	3	25	153	0	0	0	0	0	0	-99	0	2	0	0	0	0	0	0	4	-99	0	-99	-99
201501130019	2015	1	13	0	1	1	1	0	0	4	6	33.999937	69.019532	0	3	0	0	0	6	8	0	0	0	0	0	0	20	0	0	0	0	0	0	0	0	2	0	1	0	1	1	0	1	0	4	-99	0	-99	-99
201501130020	2015	1	13	0	1	1	1	0	0	147	11	10.286653	11.163861	0	3	0	0	1	6	13	0	0	0	0	0	0	15	86	147	0	0	0	0	0	0	1	0	3	0	1	14	0	0	1	3	-99	0	-99	-99
201501130022	2015	1	13	0	1	1	0	1	0	4	6	180	180	0	3	0	0	0	6	16	0	0	0	0	0	0	4	34	4	0	0	0	0	0	0	-99	0	1	0	0	0	0	0	0	4	-99	0	-99	-99
201501130025	2015	1	13	0	1	1	1	0	0	160	5	7.199509	124.796982	0	3	0	0	0	6	7	0	0	0	0	0	0	14	67	160	0	0	0	0	0	0	-99	0	0	0	0	1	0	0	-9	4	-99	0	-99	-99
201501130028	2015	1	13	0	1	1	0	1	0	214	9	48.660713	39.470314	1	3	0	0	0	6	12	0	0	0	0	0	0	4	34	214	0	0	0	0	0	0	-99	0	0	0	0	2	0	0	1	4	-99	0	-99	-99
201501130042	2015	1	13	0	1	1	1	0	0	153	6	24.891115	67.143311	0	2	0	0	0	5	3	0	0	0	0	0	0	22	109	153	0	0	0	0	0	0	-99	0	2	0	0	0	0	0	0	4	-99	0	-99	-99
201501130043	2015	1	13	0	1	1	1	0	0	153	6	24.891115	67.143311	0	1	0	0	0	5	3	0	0	0	0	0	0	22	109	153	0	0	0	0	0	0	-99	0	1	0	0	0	0	0	0	4	-99	0	-99	-99
201501130045	2015	1	13	0	1	1	1	0	0	147	11	6.333346	8.1	0	3	0	0	0	6	16	0	0	0	0	0	0	14	84	147	0	0	0	0	0	0	-99	0	0	0	0	0	0	0	1	3	-99	0	-99	-99
201501130053	2015	1	13	0	1	1	1	0	0	19	6	23.791275	90.418205	0	3	0	0	0	6	17	0	0	0	0	0	0	20	0	19	0	0	0	0	0	0	-99	0	0	0	0	0	0	0	-9	4	-99	0	-99	-99
201501130054	2015	1	13	0	1	1	1	0	0	19	6	23.791275	90.418205	0	7	0	0	0	8	19	0	0	0	0	0	0	1	7	19	0	0	0	0	0	0	-99	0	0	0	0	0	0	0	0	4	-99	0	-99	-99
201501130055	2015	1	13	0	1	1	1	0	0	19	6	23.791275	90.418205	0	7	0	0	0	8	19	0	0	0	0	0	0	20	0	19	0	0	0	0	0	0	-99	0	0	0	0	0	0	0	0	4	-99	0	-99	-99
201501130056	2015	1	13	0	1	1	1	0	0	19	6	23.791275	90.418205	0	7	0	0	0	8	19	0	0	0	0	0	0	20	0	19	0	0	0	0	0	0	-99	0	0	0	0	0	0	0	0	4	-99	0	-99	-99
201501130057	2015	1	13	0	1	1	1	0	0	19	6	23.708637	90.406164	0	1	0	0	0	6	17	0	0	0	0	0	0	2	18	19	8	49	19	0	0	0	-99	0	0	0	0	0	0	0	1	3	-99	0	-99	-99
201501130058	2015	1	13	0	1	1	1	0	0	19	6	23.791275	90.418205	0	3	0	0	0	6	17	0	0	0	0	0	0	8	49	19	0	0	0	0	0	0	-99	0	0	0	0	0	0	0	-9	4	-99	0	-99	-99
201501130063	2015	1	13	0	1	1	1	0	0	19	6	23.791275	90.418205	0	3	0	0	0	6	17	0	0	0	0	0	0	8	49	19	0	0	0	0	0	0	-99	0	0	0	0	0	0	0	0	4	-99	0	-99	-99
201501130064	2015	1	13	0	1	1	1	0	0	19	6	23.791275	90.418205	0	3	0	0	0	6	17	0	0	0	0	0	0	8	49	19	0	0	0	0	0	0	-99	0	0	0	0	0	0	0	0	4	-99	0	-99	-99
201501130065	2015	1	13	0	1	1	1	0	0	153	6	30.041944	72.352778	0	7	0	0	0	8	18	0	0	0	0	0	0	8	49	153	0	0	0	0	0	0	-99	0	0	0	0	0	0	0	1	3	-99	0	-99	-99
201501130067	2015	1	13	0	1	1	1	0	0	96	8	53.43139	-7.938226	0	3	0	0	0	6	17	0	0	0	0	0	0	20	0	96	0	0	0	0	0	0	-99	0	0	0	0	0	0	0	0	4	-99	0	-99	-99
201501130069	2015	1	13	0	1	1	1	0	0	4	6	33.473889	69.07	0	3	0	0	0	6	16	0	0	0	0	0	0	14	67	4	0	0	0	0	0	0	-99	0	3	0	0	0	0	0	0	4	-99	0	-99	-99
201501130070	2015	1	13	0	1	1	1	0	0	4	6	35.064722	69.291667	0	1	0	0	0	5	5	0	0	0	0	0	0	14	77	4	0	0	0	0	0	0	-99	0	1	0	0	0	0	0	1	3	-99	0	-99	-99
201501130071	2015	1	13	0	1	1	1	0	0	4	6	35.814512	64.435513	0	3	0	0	0	6	16	0	0	0	0	0	0	3	23	4	0	0	0	0	0	0	-99	0	0	0	0	2	0	0	1	3	-99	0	-99	-99
201501130072	2015	1	13	0	1	1	1	0	0	4	6	32.503195	67.415893	0	3	0	0	0	6	17	0	0	0	0	0	0	14	74	4	0	0	0	0	0	0	-99	0	0	0	0	0	0	0	0	4	-99	0	-99	-99
201501130075	2015	1	13	0	1	1	1	0	0	4	6	32.446622	62.144855	0	3	0	0	0	6	8	0	0	0	0	0	0	20	0	0	0	0	0	0	0	0	-99	0	0	0	0	0	0	0	0	4	-99	0	-99	-99
201501130077	2015	1	13	0	1	1	1	0	0	92	6	12.171801	75.276645	0	3	0	0	0	6	16	0	0	0	0	0	0	22	109	92	0	0	0	0	0	0	-99	0	0	0	0	0	0	0	1	3	-99	0	-99	-99
201501130078	2015	1	13	0	1	1	1	0	0	183	11	-34.066106	18.614504	0	3	0	0	0	6	31	0	0	0	0	0	0	14	82	183	0	0	0	0	0	0	-99	0	0	0	0	0	0	0	1	3	-99	0	-99	-99
201501140002	2015	1	14	0	1	1	1	0	0	153	6	26.001691	63.04137	0	2	0	0	0	5	5	0	0	0	0	0	0	8	48	153	0	0	0	0	0	0	-99	0	1	0	0	0	0	0	0	4	-99	0	-99	-99
201501140010	2015	1	14	0	1	1	1	0	0	95	10	33.303566	44.371773	1	3	0	0	0	6	16	0	0	0	0	0	0	14	67	95	0	0	0	0	0	0	-99	0	0	0	0	9	0	0	-9	4	-99	0	-99	-99
201501140011	2015	1	14	0	1	1	1	0	0	95	10	33.540672	44.251266	0	3	0	0	0	6	16	0	0	0	0	0	0	14	74	95	0	0	0	0	0	0	-99	0	2	0	0	4	0	0	-9	4	-99	0	-99	-99
201501140020	2015	1	14	0	1	1	1	0	0	113	10	32.069286	20.151144	0	3	0	0	0	6	16	0	0	0	0	0	0	21	106	113	0	0	0	0	0	0	-99	0	0	0	0	0	0	0	1	4	-99	0	-99	-99
201501140028	2015	1	14	0	1	1	1	0	0	205	5	5.987041	101.570281	1	1	0	0	0	6	15	0	0	0	0	0	0	2	18	205	3	25	205	0	0	0	-99	0	0	0	0	5	0	0	1	3	-99	0	-99	-99
201501140044	2015	1	14	0	1	1	1	0	0	19	6	23.791275	90.418205	0	1	0	0	0	5	5	0	0	0	0	0	0	2	18	19	0	0	0	0	0	0	-99	0	0	0	0	1	0	0	0	4	-99	0	-99	-99
201501140045	2015	1	14	0	1	1	1	0	0	19	6	23.791275	90.418205	0	3	0	0	0	6	17	0	0	0	0	0	0	14	68	19	0	0	0	0	0	0	-99	0	1	0	0	1	0	0	-9	4	-99	0	-99	-99
201501140055	2015	1	14	0	1	1	1	0	0	92	6	24.902503	94.160002	0	3	0	0	0	6	16	0	0	0	0	0	0	19	101	92	0	0	0	0	0	0	-99	0	0	0	0	0	0	0	0	4	-99	0	-99	-99
201501140058	2015	1	14	0	1	1	1	0	0	110	10	34.396358	35.895833	0	3	0	0	0	6	17	0	0	0	0	0	0	20	0	110	0	0	0	0	0	0	-99	0	0	0	0	0	0	0	0	4	-99	0	-99	-99
201501140062	2015	1	14	0	1	1	1	0	0	19	6	23.791275	90.418205	0	3	0	0	0	6	17	0	0	0	0	0	0	8	49	19	0	0	0	0	0	0	-99	0	0	0	0	0	0	0	-9	4	-99	0	-99	-99
201501140063	2015	1	14	0	1	1	1	0	0	19	6	23.791275	90.418205	0	3	0	0	0	6	17	0	0	0	0	0	0	14	74	19	0	0	0	0	0	0	-99	0	0	0	0	1	0	0	-9	4	-99	0	-99	-99
201501140064	2015	1	14	0	1	1	1	0	0	19	6	23.791275	90.418205	0	3	0	0	0	6	17	0	0	0	0	0	0	20	0	19	0	0	0	0	0	0	-99	0	0	0	0	0	0	0	-9	4	-99	0	-99	-99
201501140067	2015	1	14	0	1	1	0	1	0	208	10	36.713039	10.209463	0	2	0	0	0	9	23	0	0	0	0	0	0	4	34	208	0	0	0	0	0	0	2	0	0	0	0	1	0	0	0	4	-99	0	-99	-99
201501140068	2015	1	14	0	1	1	1	0	0	19	6	23.791275	90.418205	0	3	0	0	0	6	17	0	0	0	0	0	0	20	0	19	0	0	0	0	0	0	-99	0	0	0	0	0	0	0	-9	4	-99	0	-99	-99
201501140069	2015	1	14	0	1	1	1	0	0	19	6	23.791275	90.418205	0	3	0	0	0	6	17	0	0	0	0	0	0	20	0	19	0	0	0	0	0	0	-99	0	0	0	0	0	0	0	-9	4	-99	0	-99	-99
201501140071	2015	1	14	0	1	1	1	0	0	19	6	23.606111	89.840556	0	7	0	0	0	8	18	0	0	0	0	0	0	2	18	19	0	0	0	0	0	0	-99	0	0	0	0	0	0	0	1	3	-99	0	-99	-99
201501140078	2015	1	14	0	1	1	1	0	0	19	6	23.791275	90.418205	0	3	0	0	0	6	17	0	0	0	0	0	0	20	0	19	0	0	0	0	0	0	3	3	0	0	0	0	0	0	-9	4	-99	0	-99	-99
201501140081	2015	1	14	0	1	1	1	0	0	4	6	32.952896	65.535995	0	3	0	0	0	6	16	0	0	0	0	0	0	14	67	4	0	0	0	0	0	0	-99	0	2	0	0	0	0	0	-9	4	-99	0	-99	-99
201501150004	2015	1	15	0	1	1	1	0	0	95	10	33.835629	44.247406	0	3	0	0	0	6	17	0	0	0	0	0	0	14	67	95	0	0	0	0	0	0	-99	0	3	0	0	0	0	0	1	3	-99	0	-99	-99
201501150007	2015	1	15	0	1	1	1	0	0	95	10	34.473236	43.73362	0	3	0	0	0	6	17	0	0	0	0	0	0	17	94	95	0	0	0	0	0	0	-99	0	2	0	0	4	0	0	1	3	-99	0	-99	-99
201501150008	2015	1	15	0	1	1	1	0	0	95	10	34.057114	44.218292	0	3	0	0	0	6	17	0	0	0	0	0	0	14	70	95	0	0	0	0	0	0	-99	0	2	0	0	0	0	0	1	3	-99	0	-99	-99
201501150009	2015	1	15	0	1	1	1	0	0	95	10	33.953167	44.921906	0	1	0	0	0	5	5	0	0	0	0	0	0	3	25	95	0	0	0	0	0	0	-99	0	1	0	0	0	0	0	0	4	-99	0	-99	-99
201501150032	2015	1	15	0	1	1	1	0	0	60	10	31.186066	34.008556	0	3	0	0	0	6	16	0	0	0	0	0	0	20	0	60	0	0	0	0	0	0	-99	0	1	0	0	0	0	0	0	4	-99	0	-99	-99
201501150033	2015	1	15	0	1	1	1	0	0	4	6	33.367136	69.964306	0	3	0	0	0	6	16	0	0	0	0	0	0	15	86	4	0	0	0	0	0	0	-99	0	1	0	0	0	0	0	1	3	-99	0	-99	-99
201501150036	2015	1	15	0	1	1	0	1	0	182	11	11.274796	49.179657	0	2	0	0	0	5	5	0	0	0	0	0	0	4	36	182	0	0	0	0	0	0	-99	0	1	0	0	2	0	0	0	4	-99	0	-99	-99
201501150038	2015	1	15	0	1	1	1	0	0	60	10	31.200092	29.918739	0	3	0	0	0	6	16	0	0	0	0	0	0	19	100	60	0	0	0	0	0	0	-99	0	0	0	0	0	0	0	0	4	-99	0	-99	-99
201501150041	2015	1	15	0	1	1	1	0	0	153	6	24.891115	67.143311	0	2	0	0	0	5	5	0	0	0	0	0	0	22	109	153	0	0	0	0	0	0	-99	0	1	0	0	0	0	0	0	4	-99	0	-99	-99
201501150042	2015	1	15	0	1	1	1	0	0	153	6	34.123104	72.469017	0	2	0	0	0	5	5	0	0	0	0	0	0	8	49	153	0	0	0	0	0	0	3	0	0	0	0	0	0	0	-9	4	-99	0	-99	-99
201501150043	2015	1	15	0	1	1	1	0	0	153	6	31.834328	70.90905	0	3	0	0	0	6	11	0	0	0	0	0	0	3	23	153	0	0	0	0	0	0	-99	0	0	0	0	3	0	0	1	3	-99	0	-99	-99
201501150059	2015	1	15	0	1	1	1	0	0	214	9	48.637352	39.201656	0	2	0	0	0	5	4	0	0	0	0	0	0	3	25	214	0	0	0	0	0	0	-99	0	1	0	0	0	0	0	0	4	-99	0	-99	-99
201501150065	2015	1	15	0	1	1	0	1	0	228	10	16.930413	49.365315	0	1	0	0	0	5	5	0	0	0	0	0	0	4	34	228	0	0	0	0	0	0	2	0	1	0	0	0	0	0	0	4	-99	0	-99	-99
201501150069	2015	1	15	0	0	1	1	1	0	147	11	4.955535	6.638462	0	2	0	0	0	5	5	0	0	0	0	0	0	22	111	147	0	0	0	0	0	0	-99	0	0	0	0	0	0	0	0	4	-99	0	-99	-99
201501150070	2015	1	16	0	1	1	1	0	0	147	11	4.484502	7.414698	0	3	0	0	0	6	28	0	0	0	0	0	0	14	84	147	0	0	0	0	0	0	-99	0	0	0	0	0	0	0	1	3	-99	0	-99	-99
201501150083	2015	1	15	0	1	1	1	0	0	153	6	34.110325	71.163803	0	3	0	0	0	6	16	0	0	0	0	0	0	8	49	153	0	0	0	0	0	0	-99	0	0	0	0	0	0	0	0	4	-99	0	-99	-99
201501150089	2015	1	15	0	1	1	1	0	0	19	6	24.415958	91.438875	0	1	0	0	0	6	17	0	0	0	0	0	0	3	25	19	0	0	0	0	0	0	3	3	0	0	0	0	0	0	-9	4	-99	0	-99	-99
201501150090	2015	1	15	0	1	1	1	0	0	153	6	34.006004	71.53743	0	2	0	0	0	5	5	0	0	0	0	0	0	3	23	153	0	0	0	0	0	0	2	0	0	0	0	1	0	1	0	4	-99	0	-99	-99
201501150092	2015	1	15	0	1	1	1	0	0	60	10	31.145676	33.880152	0	3	0	0	0	6	16	0	0	0	0	0	0	4	34	60	0	0	0	0	0	0	-99	0	0	0	0	0	0	0	0	4	-99	0	-99	-99
201501160002	2015	1	16	0	1	1	1	0	0	95	10	33.303566	44.371773	0	3	0	0	0	6	16	0	0	0	0	0	0	1	7	95	0	0	0	0	0	0	-99	0	2	0	0	9	0	0	-9	4	-99	0	-99	-99
201501160014	2015	1	16	0	1	1	1	0	0	4	6	33.69186	63.863831	0	1	0	0	0	5	5	0	0	0	0	0	0	2	18	4	0	0	0	0	0	0	-99	0	1	0	0	0	0	0	-9	4	-99	0	-99	-99
201501160016	2015	1	16	0	1	1	1	0	0	147	11	10.286653	11.163861	0	3	0	0	1	6	13	0	0	0	0	0	0	14	74	147	0	0	0	0	0	0	1	0	6	0	1	10	0	0	-9	4	-99	0	-99	-99
201501160017	2015	1	16	0	0	1	1	1	0	4	6	35.746875	69.365561	0	1	0	0	0	5	5	0	0	0	0	0	0	14	77	4	0	0	0	0	0	0	-99	0	2	0	0	0	0	0	-9	4	-99	0	-99	-99
201501160018	2015	1	16	0	1	1	1	0	0	182	11	6.774396	47.429031	0	3	0	0	0	6	7	0	0	0	0	0	0	10	54	182	0	0	0	0	0	0	-99	0	0	0	0	0	0	0	-9	4	-99	0	-99	-99
201501160032	2015	1	16	0	1	1	1	0	0	147	11	12.164619	6.683263	0	2	7	0	0	8	18	9	23	12	0	0	0	22	110	147	0	0	0	0	0	0	-99	0	0	0	0	5	0	0	1	3	-99	0	-99	-99
201501160035	2015	1	16	0	1	1	1	0	0	214	9	46.482094	30.723489	0	3	0	0	0	6	16	0	0	0	0	0	0	1	3	214	0	0	0	0	0	0	-99	0	0	0	0	0	0	0	1	3	-99	0	-99	-99
201501160036	2015	1	16	0	1	1	0	1	0	214	9	48.660713	39.470314	1	3	0	0	0	6	17	0	0	0	0	0	0	4	34	214	0	0	0	0	0	0	1	0	1	0	0	3	0	0	0	4	-99	0	-99	-99
201501160037	2015	1	16	0	0	1	1	1	0	147	11	7.617529	5.218357	0	5	0	0	0	5	5	0	0	0	0	0	0	2	15	147	0	0	0	0	0	0	-99	0	0	0	0	1	0	0	1	3	-99	1	-99	0
201501160039	2015	1	16	0	1	1	0	1	0	95	10	33.949776	44.152668	0	3	0	0	0	6	17	0	0	0	0	0	0	4	34	95	0	0	0	0	0	0	-99	0	8	0	0	12	0	0	1	3	-99	0	-99	-99
201501160041	2015	1	16	0	1	1	1	0	0	19	6	23.791275	90.418205	0	3	0	0	0	6	17	0	0	0	0	0	0	1	11	19	0	0	0	0	0	0	-99	0	0	0	0	0	0	0	-9	4	-99	0	-99	-99
201501160042	2015	1	16	0	1	1	1	0	0	19	6	23.791275	90.418205	0	3	0	0	0	6	17	0	0	0	0	0	0	20	0	19	0	0	0	0	0	0	-99	0	0	0	0	0	0	0	-9	4	-99	0	-99	-99
201501160043	2015	1	16	0	1	1	1	0	0	19	6	23.791275	90.418205	0	3	0	0	0	6	17	0	0	0	0	0	0	20	0	19	0	0	0	0	0	0	-99	0	0	0	0	0	0	0	-9	4	-99	0	-99	-99
201501160044	2015	1	16	0	1	1	1	0	0	19	6	23.791275	90.418205	0	3	0	0	0	6	17	0	0	0	0	0	0	8	49	19	0	0	0	0	0	0	-99	0	0	0	0	0	0	0	-9	4	-99	0	-99	-99
201501160046	2015	1	16	0	1	1	1	0	0	19	6	23.791275	90.418205	0	3	0	0	0	6	17	0	0	0	0	0	0	20	0	19	0	0	0	0	0	0	-99	0	0	0	0	0	0	0	-9	4	-99	0	-99	-99
201501160048	2015	1	16	0	1	1	1	0	0	60	10	31.199595	29.918559	0	3	0	0	0	6	15	0	0	0	0	0	0	3	22	60	0	0	0	0	0	0	-99	0	0	0	0	0	0	0	-9	4	-99	0	-99	-99
201501160052	2015	1	14	0	1	1	1	0	0	19	6	23.791275	90.418205	0	3	0	0	0	6	17	0	0	0	0	0	0	14	81	19	0	0	0	0	0	0	-99	0	0	0	0	0	0	0	0	4	-99	0	-99	-99
201501160053	2015	1	14	0	1	1	1	0	0	19	6	22.398561	91.85903	0	3	0	0	0	6	17	0	0	0	0	0	0	2	15	19	0	0	0	0	0	0	-99	0	0	0	0	0	0	0	-9	4	-99	0	-99	-99
201501160055	2015	1	16	0	1	1	1	0	0	153	6	31.834328	70.90905	0	3	0	0	0	6	7	0	0	0	0	0	0	3	25	153	0	0	0	0	0	0	-99	0	4	0	0	0	0	0	1	3	-99	0	-99	-99
201501160057	2015	1	16	0	1	1	1	0	0	153	6	29.399281	71.673784	0	3	0	0	0	6	12	0	0	0	0	0	0	14	68	153	0	0	0	0	0	0	-99	0	1	0	0	8	0	0	1	3	-99	0	-99	-99
201501160061	2015	1	16	0	1	1	0	1	0	4	6	36.21759	65.931873	0	2	0	0	0	5	5	0	0	0	0	0	0	4	29	4	0	0	0	0	0	0	-99	0	1	0	0	1	0	0	1	3	-99	0	-99	-99
201501170002	2015	1	17	0	1	1	1	0	0	95	10	33.460819	44.157433	0	3	0	0	0	6	16	0	0	0	0	0	0	14	74	95	0	0	0	0	0	0	-99	0	5	0	0	14	0	0	-9	4	-99	0	-99	-99
201501170003	2015	1	17	0	1	1	1	0	0	95	10	32.887157	44.341637	1	3	0	0	0	6	16	0	0	0	0	0	0	14	74	95	0	0	0	0	0	0	-99	0	4	0	0	14	0	0	-9	4	-99	0	-99	-99
201501170004	2015	1	17	0	1	1	1	0	0	95	10	33.303566	44.371773	0	3	0	0	0	6	16	0	0	0	0	0	0	1	7	95	0	0	0	0	0	0	-99	0	2	0	0	6	0	0	-9	4	-99	0	-99	-99
201501170012	2015	1	17	0	1	1	1	0	0	95	10	33.303566	44.371773	0	1	0	0	0	5	5	0	0	0	0	0	0	2	18	95	0	0	0	0	0	0	-99	0	1	0	0	0	0	0	-9	4	-99	0	-99	-99
201501170016	2015	1	17	0	1	1	1	0	0	4	6	34.007712	68.714007	0	3	0	0	0	6	15	0	0	0	0	0	0	20	0	0	0	0	0	0	0	0	-99	0	0	0	0	0	0	0	0	4	-99	0	-99	-99
201501170023	2015	1	17	0	1	1	1	0	0	4	6	31.503056	65.561944	0	3	0	0	0	6	8	0	0	0	0	0	0	15	85	4	3	25	4	0	0	0	-99	0	1	0	0	2	0	0	-9	4	-99	0	-99	-99
201501170024	2015	1	17	0	1	1	1	0	0	113	10	32.069286	20.151144	0	3	0	0	0	6	11	0	0	0	0	0	0	1	8	113	0	0	0	0	0	0	-99	0	0	0	0	0	0	0	1	3	-99	0	-99	-99
201501170039	2015	1	17	0	1	1	1	0	0	182	11	3.115641	43.64658	0	2	0	0	0	5	5	0	0	0	0	0	0	15	85	182	0	0	0	0	0	0	-99	0	1	0	0	0	0	0	0	4	-99	0	-99	-99
201501170041	2015	1	17	0	1	1	1	1	0	60	10	30.022924	31.185192	0	3	0	0	0	6	16	0	0	0	0	0	0	21	106	60	0	0	0	0	0	0	-99	0	0	0	0	0	0	0	1	4	-99	0	-99	-99
201501170042	2015	1	17	0	1	1	1	0	0	60	10	29.966757	32.549628	0	3	0	0	0	6	16	0	0	0	0	0	0	19	100	60	0	0	0	0	0	0	-99	0	0	0	0	0	0	0	1	4	-99	0	-99	-99
201501170043	2015	1	17	0	1	1	0	1	0	153	6	33.423333	70.368889	0	3	0	0	0	6	16	0	0	0	0	0	0	4	34	153	0	0	0	0	0	0	-99	0	0	0	0	1	0	0	0	4	-99	0	-99	-99
201501170044	2015	1	17	0	1	1	1	0	0	147	11	7.657065	9.772456	0	2	0	0	0	5	5	9	23	0	0	0	0	14	67	147	0	0	0	0	0	0	-99	0	2	0	0	1	0	0	0	4	-99	0	-99	-99
201501170047	2015	1	17	0	1	1	1	0	0	19	6	23.791275	90.418205	0	2	0	0	0	6	17	8	19	0	0	0	0	3	23	19	0	0	0	0	0	0	-99	0	1	0	0	4	0	0	1	3	-99	0	-99	-99
201501170055	2015	1	17	0	1	1	1	0	0	19	6	24.366769	88.59991	0	3	0	0	0	6	17	0	0	0	0	0	0	3	23	19	0	0	0	0	0	0	-99	0	0	0	0	0	0	0	-9	4	-99	0	-99	-99
201501170058	2015	1	17	0	1	1	1	0	0	19	6	24.886896	89.362092	0	3	0	0	0	6	17	0	0	0	0	0	0	22	109	19	0	0	0	0	0	0	-99	0	0	0	0	0	0	0	-9	4	-99	0	-99	-99
201501170064	2015	1	17	0	1	1	1	0	0	96	8	53.361675	-6.245485	0	3	0	0	0	6	16	0	0	0	0	0	0	1	12	96	0	0	0	0	0	0	-99	0	0	0	0	0	0	0	0	4	-99	0	-99	-99
201501170070	2015	1	17	0	1	1	1	0	0	60	10	27.257896	33.811607	0	3	0	0	0	6	16	0	0	0	0	0	0	21	107	60	0	0	0	0	0	0	-99	0	0	0	0	0	0	0	1	4	-99	0	-99	-99
201501170074	2015	1	17	0	1	1	1	0	0	19	6	23.791275	90.418205	0	3	0	0	0	6	16	0	0	0	0	0	0	19	99	19	0	0	0	0	0	0	-99	1	0	0	0	0	0	0	1	3	-99	0	-99	-99
201501170075	2015	1	17	0	1	1	0	1	0	160	5	6.601844	121.906967	0	2	0	0	0	5	5	0	0	0	0	0	0	4	34	160	0	0	0	0	0	0	2	0	1	0	0	0	0	0	0	4	-99	0	-99	-99
201501180002	2015	1	18	0	1	1	1	0	0	95	10	33.057991	44.354839	0	3	0	0	0	6	16	0	0	0	0	0	0	14	74	95	0	0	0	0	0	0	-99	0	2	0	0	7	0	0	-9	4	-99	0	-99	-99
201501180010	2015	1	18	0	1	1	1	0	0	95	10	33.07835	44.254719	0	3	0	0	0	6	16	0	0	0	0	0	0	20	0	95	0	0	0	0	0	0	-99	0	2	0	2	2	0	2	0	4	-99	0	-99	-99
201501180011	2015	1	18	0	1	1	1	0	0	95	10	33.303566	44.371773	0	3	0	0	0	6	16	0	0	0	0	0	0	1	7	95	0	0	0	0	0	0	-99	0	1	0	0	7	0	0	-9	4	-99	0	-99	-99
201501180012	2015	1	18	0	1	1	1	0	0	95	10	33.303566	44.371773	0	3	0	0	0	6	16	0	0	0	0	0	0	3	23	95	0	0	0	0	0	0	-99	0	2	0	0	5	0	0	0	4	-99	0	-99	-99
201501180013	2015	1	18	0	1	1	1	0	0	95	10	33.589786	44.266976	0	3	0	0	0	6	11	0	0	0	0	0	0	14	76	95	0	0	0	0	0	0	-99	0	3	0	0	11	0	0	1	3	-99	0	-99	-99
201501180014	2015	1	18	0	1	1	1	0	0	153	6	28.380661	68.343147	0	3	0	0	0	6	16	0	0	0	0	0	0	19	100	153	0	0	0	0	0	0	-99	0	0	0	0	0	0	0	0	4	-99	0	-99	-99
201501180016	2015	1	18	0	1	1	1	0	0	4	6	31.825871	64.576431	1	3	0	0	1	6	15	0	0	0	0	0	0	1	13	4	14	67	4	0	0	0	1	0	4	0	1	10	0	0	1	4	-99	0	-99	-99
201501180017	2015	1	18	0	1	1	1	0	0	4	6	33.335258	69.928467	0	3	0	0	0	6	8	0	0	0	0	0	0	3	23	4	14	67	4	0	0	0	-99	0	0	0	0	5	0	0	1	3	-99	0	-99	-99
201501180018	2015	1	18	0	1	1	1	0	0	4	6	31.631083	65.742226	0	1	0	0	1	6	15	0	0	0	0	0	0	2	15	4	0	0	0	0	0	0	1	0	1	0	1	2	0	0	1	3	-99	0	-99	-99
201501180019	2015	1	18	0	1	1	1	0	0	228	10	13.702663	44.73357	0	1	0	0	0	5	5	0	0	0	0	0	0	8	48	228	0	0	0	0	0	0	-99	0	1	0	0	0	0	0	-9	4	-99	0	-99	-99
201501180021	2015	1	18	0	1	1	1	0	0	228	10	15.325443	44.211895	0	1	0	0	0	5	2	0	0	0	0	0	0	2	14	228	0	0	0	0	0	0	-99	0	6	0	0	0	0	0	0	4	-99	0	-99	-99
201501180029	2015	1	18	0	1	1	1	0	0	153	6	24.891115	67.143311	0	2	0	0	0	5	5	0	0	0	0	0	0	3	22	153	0	0	0	0	0	0	2	0	2	0	0	0	0	0	0	4	-99	0	-99	-99
201501180030	2015	1	18	0	1	1	1	0	0	4	6	34.516895	69.147011	0	3	0	0	1	6	13	0	0	0	0	0	0	2	21	4	0	0	0	0	0	0	5	5	0	0	0	0	0	0	0	4	-99	0	-99	-99
201501180034	2015	1	18	0	1	1	1	0	0	153	6	24.891115	67.143311	0	2	0	0	0	5	5	0	0	0	0	0	0	2	18	153	0	0	0	0	0	0	-99	0	2	0	0	0	0	0	1	3	-99	0	-99	-99
201501180035	2015	1	18	0	1	1	1	0	0	153	6	24.891115	67.143311	0	2	0	0	0	5	5	0	0	0	0	0	0	14	77	153	0	0	0	0	0	0	-99	0	1	0	0	0	0	0	0	4	-99	0	-99	-99
201501180038	2015	1	18	0	1	1	1	0	0	4	6	34.301389	62.246389	0	1	0	0	0	5	5	0	0	0	0	0	0	3	25	4	0	0	0	0	0	0	-99	0	1	0	0	0	0	0	-9	4	-99	0	-99	-99
201501180041	2015	1	18	0	1	1	1	0	0	92	6	33.733444	75.059298	0	2	0	0	0	5	5	0	0	0	0	0	0	2	15	92	0	0	0	0	0	0	-99	0	1	0	0	1	0	0	-9	4	-99	0	-99	-99
201501180046	2015	1	18	0	1	1	1	0	0	147	11	9.711994	8.558519	0	2	0	0	0	5	5	0	0	0	0	0	0	14	75	147	0	0	0	0	0	0	-99	0	1	0	0	0	0	0	-9	4	-99	0	-99	-99
201501180047	2015	1	18	0	1	1	1	0	0	19	6	23.791275	90.418205	0	3	0	0	0	6	17	0	0	0	0	0	0	14	67	19	0	0	0	0	0	0	-99	0	0	0	0	3	0	0	-9	4	-99	0	-99	-99
201501180084	2015	1	18	0	1	1	1	0	0	4	6	34.171831	70.621679	0	3	0	0	0	6	10	0	0	0	0	0	0	19	105	4	0	0	0	0	0	0	-99	0	6	0	0	0	0	0	1	3	-99	0	-99	-99
201501180100	2015	1	18	0	1	1	1	0	0	153	6	28.2787	68.99719	1	3	0	0	0	6	16	0	0	0	0	0	0	20	0	153	0	0	0	0	0	0	-99	0	0	0	0	0	0	0	0	4	-99	0	-99	-99
201501190001	2015	1	19	0	1	1	1	0	0	95	10	33.057991	44.354839	0	3	0	0	0	6	15	0	0	0	0	0	0	14	67	95	0	0	0	0	0	0	-99	0	1	0	0	3	0	0	1	3	-99	0	-99	-99
201501190002	2015	1	19	0	1	1	1	0	0	95	10	33.303566	44.371773	0	3	0	0	0	6	15	0	0	0	0	0	0	20	0	95	0	0	0	0	0	0	-99	0	0	0	0	0	0	0	0	4	-99	0	-99	-99
201501190003	2015	1	19	0	1	1	0	1	0	95	10	32.982933	44.361595	1	3	0	0	0	6	16	0	0	0	0	0	0	4	29	95	0	0	0	0	0	0	-99	0	0	0	0	3	0	0	0	4	-99	0	-99	-99
201501190004	2015	1	19	0	1	1	1	0	0	153	6	29.195278	67.643889	0	3	0	0	0	6	8	0	0	0	0	0	0	14	67	153	0	0	0	0	0	0	-99	0	0	0	0	2	0	0	0	4	-99	0	-99	-99
201501190012	2015	1	19	0	1	1	1	0	0	228	10	15.325443	44.211895	0	2	0	0	0	5	5	0	0	0	0	0	0	2	18	228	0	0	0	0	0	0	-99	0	0	0	0	0	0	0	-9	4	-99	0	-99	-99
201501190019	2015	1	19	0	1	1	1	0	0	153	6	24.891115	67.143311	0	2	0	0	0	5	5	0	0	0	0	0	0	3	25	153	14	77	153	0	0	0	-99	0	1	0	0	0	0	0	0	4	-99	0	-99	-99
201501190024	2015	1	19	0	1	1	1	0	0	205	5	6.517235	101.652946	0	3	0	0	0	6	17	0	0	0	0	0	0	4	35	205	8	48	205	0	0	0	-99	0	0	0	0	1	0	0	1	3	-99	0	-99	-99
201501190030	2015	1	19	0	1	1	1	0	0	228	10	15.325443	44.211895	0	2	0	0	0	5	5	0	0	0	0	0	0	7	46	228	0	0	0	0	0	0	-99	0	0	0	0	0	0	0	-9	4	-99	0	-99	-99
201501190032	2015	1	19	0	1	1	1	0	0	92	6	34.104275	74.619743	1	3	0	0	0	6	17	0	0	0	0	0	0	19	100	92	0	0	0	0	0	0	-99	0	0	0	0	0	0	0	0	4	-99	0	-99	-99
201501190033	2015	1	19	0	1	1	1	0	0	92	6	34.360187	74.474544	0	3	0	0	0	6	17	0	0	0	0	0	0	20	0	92	0	0	0	0	0	0	-99	0	0	0	0	0	0	0	0	4	-99	0	-99	-99
201501190037	2015	1	19	0	1	1	1	0	0	214	9	48.346134	38.424828	0	3	0	0	0	6	11	0	0	0	0	0	0	14	75	214	0	0	0	0	0	0	-99	0	2	0	0	10	0	0	-9	4	-99	0	-99	-99
201501190062	2015	1	19	0	1	1	0	1	0	153	6	33.530187	71.059821	0	2	0	0	0	5	5	0	0	0	0	0	0	4	27	153	0	0	0	0	0	0	-99	0	0	0	0	0	0	0	-9	4	-99	0	-99	-99
201501190063	2015	1	19	0	1	1	1	0	0	110	10	33.5577	35.384777	0	3	0	0	0	6	7	0	0	0	0	0	0	1	9	110	0	0	0	0	0	0	-99	0	0	0	0	0	0	0	1	3	-99	0	-99	-99
201501190081	2015	1	19	0	1	1	1	0	0	19	6	22.341896	91.815117	0	3	0	0	0	6	17	0	0	0	0	0	0	1	7	19	0	0	0	0	0	0	-99	0	0	0	0	1	0	0	-9	4	-99	0	-99	-99
201501190082	2015	1	18	0	1	1	1	0	0	19	6	23.791275	90.418205	0	3	0	0	0	6	17	0	0	0	0	0	0	3	22	19	0	0	0	0	0	0	-99	0	0	0	0	0	0	0	-9	4	-99	0	-99	-99
201501190084	2015	1	19	0	1	1	1	0	0	19	6	24.448424	89.705561	0	3	0	0	0	6	17	0	0	0	0	0	0	20	0	19	0	0	0	0	0	0	-99	0	0	0	0	0	0	0	1	3	-99	0	-99	-99
201501190105	2015	1	19	0	1	1	1	0	0	4	6	33.335258	69.928467	0	3	0	0	0	6	16	0	0	0	0	0	0	1	7	4	0	0	0	0	0	0	-99	0	2	0	0	0	0	0	-9	4	-99	0	-99	-99
201501190113	2015	1	19	0	1	1	1	0	0	19	6	25.754216	89.250804	0	2	0	0	0	5	5	0	0	0	0	0	0	3	25	19	0	0	0	0	0	0	-99	0	0	0	0	16	0	0	0	4	-99	0	-99	-99
201501190114	2015	1	19	0	1	1	1	0	0	60	10	31.212225	34.117065	0	3	0	0	0	6	11	0	0	0	0	0	0	8	49	60	0	0	0	0	0	0	-99	0	0	0	0	0	0	0	1	3	-99	0	-99	-99
201501200008	2015	1	20	0	1	1	1	0	0	153	6	28.54439	68.218002	0	3	0	0	0	6	16	0	0	0	0	0	0	20	0	153	0	0	0	0	0	0	-99	0	0	0	0	0	0	0	0	4	-99	0	-99	-99
201501200010	2015	1	20	0	1	1	1	0	0	153	6	28.612296	67.485894	0	1	0	0	0	5	5	0	0	0	0	0	0	2	15	153	0	0	0	0	0	0	-99	0	0	0	0	1	0	0	0	4	-99	0	-99	-99
201501200011	2015	1	20	0	1	1	1	0	0	95	10	33.303566	44.371773	0	3	0	0	0	6	29	0	0	0	0	0	0	19	99	95	0	0	0	0	0	0	-99	0	3	0	0	7	0	0	1	3	-99	0	-99	-99
201501200027	2015	1	20	0	1	1	1	0	0	4	6	33.542622	68.415329	0	3	0	0	0	6	8	0	0	0	0	0	0	20	0	0	0	0	0	0	0	0	-99	0	0	0	0	0	0	0	0	4	-99	0	-99	-99
201501200030	2015	1	20	0	1	1	1	0	0	113	10	31.197586	16.586681	0	2	0	0	0	5	5	0	0	0	0	0	0	2	18	113	0	0	0	0	0	0	-99	0	0	0	0	0	0	0	0	4	-99	0	-99	-99
201501200032	2015	1	20	0	1	1	1	0	0	160	5	7.285664	124.410877	0	3	0	0	0	6	12	0	0	0	0	0	0	20	0	160	0	0	0	0	0	0	-99	0	0	0	0	0	0	0	0	4	-99	0	-99	-99
201501200038	2015	1	20	0	1	1	1	0	0	41	11	4.37474	18.551292	0	4	0	0	0	5	5	0	0	0	0	0	0	7	47	422	0	0	0	0	0	0	-99	0	0	0	0	0	0	0	0	4	-99	0	-99	-99
201501200042	2015	1	20	0	1	1	0	1	0	60	10	31.16983	34.087421	0	3	0	0	0	6	16	0	0	0	0	0	0	4	35	60	0	0	0	0	0	0	-99	0	0	0	0	3	0	0	1	4	-99	0	-99	-99
201501200045	2015	1	20	0	1	1	1	0	0	84	11	9.517441	-13.693323	0	3	0	0	0	6	7	0	0	0	0	0	0	14	78	84	0	0	0	0	0	0	1	1	1	0	0	4	0	1	0	4	-99	0	-99	-99
201501200046	2015	1	20	0	1	1	1	0	0	603	8	54.607712	-5.95621	0	3	0	0	0	6	31	0	0	0	0	0	0	20	0	233	0	0	0	0	0	0	-99	0	0	0	0	0	0	0	0	4	-99	0	-99	-99
201501200047	2015	1	20	0	1	1	1	0	0	94	10	28.247855	61.251891	0	2	0	0	0	5	5	0	0	0	0	0	0	3	25	94	0	0	0	0	0	0	-99	0	1	0	0	2	0	0	0	4	-99	0	-99	-99
201501200051	2015	1	20	0	1	1	1	0	0	95	10	33.303566	44.371773	0	3	0	0	0	6	16	0	0	0	0	0	0	1	6	95	0	0	0	0	0	0	-99	0	5	0	0	11	0	0	-9	4	-99	0	-99	-99
201501200052	2015	1	20	0	1	1	1	0	0	95	10	33.043201	44.641945	0	1	0	0	0	6	16	0	0	0	0	0	0	2	18	95	0	0	0	0	0	0	-99	0	1	0	0	3	0	0	1	3	-99	0	-99	-99
201501200053	2015	1	20	0	1	1	1	0	0	95	10	34.881348	44.62513	0	3	0	0	0	6	15	0	0	0	0	0	0	14	71	95	0	0	0	0	0	0	-99	0	0	0	0	1	0	0	1	3	-99	0	-99	-99
201501200056	2015	1	20	0	1	1	1	0	0	95	10	34.880926	44.620868	0	9	0	0	0	13	0	0	0	0	0	0	0	3	25	95	0	0	0	0	0	0	-99	0	1	0	0	0	0	0	0	4	-99	0	-99	-99
201501200057	2015	1	20	1	1	1	1	0	0	95	10	34.881348	44.62513	0	6	0	0	0	13	0	0	0	0	0	0	0	14	77	95	0	0	0	0	0	0	-99	0	0	0	0	0	0	0	0	4	-99	1	1	0
201501200083	2015	1	20	0	1	1	1	0	0	19	6	22.374841	91.918658	1	3	0	0	0	6	17	0	0	0	0	0	0	2	15	19	0	0	0	0	0	0	-99	0	0	0	0	0	0	0	1	3	-99	0	-99	-99
201501200085	2015	1	20	0	1	1	1	0	0	19	6	23.638729	88.83371	0	3	0	0	0	6	17	0	0	0	0	0	0	2	21	19	0	0	0	0	0	0	-99	0	0	0	0	0	0	0	-9	4	-99	0	-99	-99
201501200086	2015	1	20	0	1	1	1	0	0	19	6	23.791275	90.418205	0	3	0	0	0	6	17	0	0	0	0	0	0	8	49	19	0	0	0	0	0	0	-99	0	0	0	0	0	0	0	1	3	-99	0	-99	-99
201501200088	2015	1	20	0	1	1	1	0	0	155	10	31.502407	34.459743	0	3	0	0	0	6	17	0	0	0	0	0	0	22	109	155	0	0	0	0	0	0	-99	0	0	0	0	0	0	0	1	3	-99	0	-99	-99
201501200091	2015	1	20	0	1	1	1	0	0	4	6	36.178903	68.745306	0	1	0	0	0	6	29	0	0	0	0	0	0	14	68	4	0	0	0	0	0	0	-99	0	1	0	0	0	0	0	1	3	-99	0	-99	-99
201501200093	2015	1	20	0	1	1	1	0	0	214	9	47.354656	36.998952	1	3	0	0	0	6	16	0	0	0	0	0	0	19	100	214	0	0	0	0	0	0	-99	0	0	0	0	0	0	0	1	4	-99	0	-99	-99
201501200095	2015	1	20	0	1	1	1	0	0	153	6	33.780827	72.725159	0	3	0	0	1	6	13	0	0	0	0	0	0	3	24	153	14	68	153	0	0	0	1	0	1	0	1	3	0	0	1	3	-99	0	-99	-99
201501200102	2015	1	19	0	1	1	1	0	0	19	6	24.590334	88.828436	1	7	0	0	0	8	20	0	0	0	0	0	0	22	110	19	0	0	0	0	0	0	-99	0	0	0	0	0	0	0	1	3	-99	0	-99	-99
201501200104	2015	1	20	0	1	1	1	0	0	214	9	48.736645	39.226654	0	3	0	0	0	6	11	0	0	0	0	0	0	14	76	214	0	0	0	0	0	0	-99	0	0	0	0	0	0	0	1	3	-99	0	-99	-99
201501200105	2015	1	21	0	1	1	1	0	0	214	9	48.78764	39.307636	0	3	0	0	0	6	11	0	0	0	0	0	0	8	49	214	0	0	0	0	0	0	-99	0	0	0	0	0	0	0	1	3	-99	0	-99	-99
201501200106	2015	1	20	0	1	1	1	0	0	214	9	48.750614	38.787846	0	3	0	0	0	6	11	0	0	0	0	0	0	14	76	214	0	0	0	0	0	0	-99	0	0	0	0	0	0	0	1	4	-99	0	-99	-99
201501200110	2015	1	20	0	1	1	1	0	0	160	5	14.514697	121.066055	0	1	0	0	0	5	3	0	0	0	0	0	0	2	15	160	0	0	0	0	0	0	2	0	1	0	0	0	0	0	0	4	-99	0	-99	-99
201501200114	2015	1	19	0	1	1	1	0	0	19	6	23.791275	90.418205	0	3	0	0	0	6	17	0	0	0	0	0	0	8	49	19	0	0	0	0	0	0	-99	0	0	0	0	0	0	0	0	4	-99	0	-99	-99
201501200115	2015	1	20	0	1	1	1	0	0	19	6	23.791275	90.418205	0	3	0	0	0	6	16	0	0	0	0	0	0	14	77	19	0	0	0	0	0	0	-99	0	0	0	0	1	0	0	-9	4	-99	0	-99	-99
201501210007	2015	1	21	0	1	1	1	0	0	182	11	-0.357847	42.54665	0	3	0	0	0	6	16	0	0	0	0	0	0	4	35	182	14	67	182	0	0	0	-99	0	0	0	0	1	0	0	1	3	-99	0	-99	-99
201501210009	2015	1	21	0	1	1	0	1	0	92	6	24.214748	94.268814	0	3	0	0	0	6	16	0	0	0	0	0	0	4	27	92	0	0	0	0	0	0	-99	0	0	0	0	0	0	0	-9	4	-99	0	-99	-99
201501210013	2015	1	21	0	1	1	1	0	0	160	5	6.700414	121.972557	0	3	0	0	0	6	16	0	0	0	0	0	0	14	68	160	0	0	0	0	0	0	-99	0	0	0	0	0	0	0	0	4	-99	0	-99	-99
201501210014	2015	1	21	0	1	1	1	0	0	95	10	33.509014	44.202484	0	3	0	0	0	6	16	0	0	0	0	0	0	1	7	95	0	0	0	0	0	0	-99	0	1	0	0	8	0	0	-9	4	-99	0	-99	-99
201501210015	2015	1	21	0	1	1	1	0	0	95	10	33.540672	44.251266	0	3	0	0	0	6	16	0	0	0	0	0	0	2	18	95	0	0	0	0	0	0	-99	0	2	0	0	6	0	0	1	3	-99	0	-99	-99
201501210017	2015	1	21	0	1	1	1	0	0	95	10	33.303566	44.371773	0	3	0	0	0	6	16	0	0	0	0	0	0	1	7	95	0	0	0	0	0	0	-99	0	2	0	0	9	0	0	-9	4	-99	0	-99	-99
201501210018	2015	1	21	0	1	1	1	0	0	95	10	33.303566	44.371773	0	3	0	0	0	6	16	0	0	0	0	0	0	1	7	95	0	0	0	0	0	0	-99	0	1	0	0	7	0	0	-9	4	-99	0	-99	-99
201501210021	2015	1	21	0	1	1	1	0	0	95	10	33.303566	44.371773	0	3	0	0	0	6	16	0	0	0	0	0	0	15	86	95	0	0	0	0	0	0	-99	0	0	0	0	0	0	0	0	4	-99	0	-99	-99
201501210027	2015	1	21	0	1	1	1	0	0	19	6	22.341896	91.815117	0	3	0	0	0	6	17	0	0	0	0	0	0	3	23	19	0	0	0	0	0	0	-99	0	0	0	0	3	0	0	-9	4	-99	0	-99	-99
201501210028	2015	1	21	0	1	1	1	0	1	19	6	23.791275	90.418205	0	3	0	0	0	6	17	0	0	0	0	0	0	8	49	19	1	3	19	22	109	19	-99	0	0	0	0	4	0	0	-9	4	-99	0	-99	-99
201501210029	2015	1	21	0	1	1	1	0	1	19	6	23.791275	90.418205	0	3	0	0	0	6	17	0	0	0	0	0	0	8	49	19	19	105	19	0	0	0	-99	0	0	0	0	1	0	0	-9	4	-99	0	-99	-99
201501210030	2015	1	21	0	1	1	1	0	1	19	6	23.791275	90.418205	0	3	0	0	0	6	17	0	0	0	0	0	0	8	49	19	0	0	0	0	0	0	-99	0	0	0	0	0	0	0	-9	4	-99	0	-99	-99
201501210031	2015	1	21	0	1	1	1	0	1	19	6	23.791275	90.418205	0	3	0	0	0	6	17	0	0	0	0	0	0	1	3	19	0	0	0	0	0	0	-99	0	0	0	0	1	0	0	-9	4	-99	0	-99	-99
201501210033	2015	1	21	0	1	1	1	0	0	19	6	23.708637	90.406164	0	3	0	0	0	6	17	0	0	0	0	0	0	2	14	19	0	0	0	0	0	0	-99	0	0	0	0	0	0	0	-9	4	-99	0	-99	-99
201501210034	2015	1	21	0	1	1	1	0	0	19	6	22.349949	89.194325	0	3	0	0	0	6	17	0	0	0	0	0	0	19	99	19	0	0	0	0	0	0	-99	0	0	0	0	0	0	0	1	3	-99	0	-99	-99
201501210036	2015	1	21	0	1	1	1	0	0	200	10	34.717705	36.722824	0	3	0	0	0	6	15	0	0	0	0	0	0	14	74	200	0	0	0	0	0	0	-99	0	5	0	0	30	0	0	1	3	-99	0	-99	-99
201501210037	2015	1	21	0	1	1	1	0	0	153	6	24.891115	67.143311	0	2	0	0	0	5	5	0	0	0	0	0	0	8	48	153	0	0	0	0	0	0	-99	0	1	0	0	0	0	0	0	4	-99	0	-99	-99
201501210042	2015	1	21	0	1	1	1	0	0	153	6	28.518663	68.542679	0	3	0	0	0	6	16	0	0	0	0	0	0	21	106	153	0	0	0	0	0	0	-99	0	0	0	0	0	0	0	1	4	-99	0	-99	-99
201501210043	2015	1	21	0	1	1	1	0	0	141	6	26.841428	86.214452	0	7	0	0	0	8	20	0	0	0	0	0	0	10	53	141	0	0	0	0	0	0	8	0	0	0	0	0	0	0	1	3	-99	0	-99	-99
201501210049	2015	1	22	0	1	1	1	0	0	19	6	22.633384	90.2706	1	1	0	0	0	8	18	0	0	0	0	0	0	22	109	19	0	0	0	0	0	0	-99	0	0	0	0	0	0	0	1	3	-99	0	-99	-99
201501210078	2015	1	21	0	1	1	0	1	1	214	9	48.724888	38.631035	1	3	0	0	0	6	11	0	0	0	0	0	0	4	36	214	0	0	0	0	0	0	-99	0	0	0	0	0	0	0	-9	4	-99	0	-99	-99
201501210079	2015	1	21	0	1	1	1	0	0	153	6	34.740321	71.511591	0	2	0	0	0	5	5	0	0	0	0	0	0	3	25	153	0	0	0	0	0	0	-99	0	1	0	0	0	0	0	0	4	-99	0	-99	-99
201501210082	2015	1	21	0	1	1	1	0	0	60	10	31.211645	34.110425	0	3	0	0	0	6	16	0	0	0	0	0	0	4	35	60	0	0	0	0	0	0	-99	0	0	0	0	0	0	0	0	4	-99	0	-99	-99
201501210083	2015	1	21	0	1	1	1	0	0	60	10	31.212225	34.117065	0	2	0	0	0	6	11	5	2	0	0	0	0	3	22	60	0	0	0	0	0	0	-99	0	0	0	0	0	0	0	0	4	-99	0	-99	-99
201501220003	2015	1	22	0	1	1	0	1	0	153	6	28.868734	68.334164	0	2	0	0	0	6	11	5	5	0	0	0	0	4	36	153	0	0	0	0	0	0	-99	0	0	0	0	0	0	0	0	4	-99	0	-99	-99
201501220019	2015	1	22	0	1	1	1	0	0	113	10	31.197586	16.586681	0	1	0	0	0	5	5	0	0	0	0	0	0	3	25	113	0	0	0	0	0	0	-99	0	2	0	0	0	0	0	1	3	-99	0	-99	-99
201501220021	2015	1	22	0	1	1	1	0	0	92	6	24.434436	93.721188	0	3	0	0	0	6	16	0	0	0	0	0	0	20	0	92	0	0	0	0	0	0	-99	0	0	0	0	0	0	0	0	4	-99	0	-99	-99
201501220022	2015	1	22	0	1	1	1	0	0	92	6	24.798346	93.94043	1	3	0	0	0	6	7	0	0	0	0	0	0	2	15	92	0	0	0	0	0	0	-99	0	0	0	0	0	0	0	0	4	-99	0	-99	-99
201501220023	2015	1	22	0	1	1	1	0	0	60	10	29.831976	31.337257	0	1	0	0	0	6	16	0	0	0	0	0	0	2	14	60	0	0	0	0	0	0	-99	0	0	0	0	0	0	0	1	3	-99	0	-99	-99
201501220032	2015	1	22	0	1	1	1	0	0	160	5	6.41871	121.972443	0	3	0	0	0	6	16	0	0	0	0	0	0	8	49	160	0	0	0	0	0	0	-99	0	0	0	0	0	0	0	0	4	-99	0	-99	-99
201501220034	2015	1	22	0	1	1	1	0	0	95	10	33.540672	44.251266	0	3	0	0	0	6	16	0	0	0	0	0	0	3	23	95	0	0	0	0	0	0	-99	0	2	0	0	2	0	0	0	4	-99	0	-99	-99
201501220035	2015	1	22	0	1	1	1	0	0	95	10	33.303566	44.371773	0	3	0	0	0	6	16	0	0	0	0	0	0	14	67	95	0	0	0	0	0	0	-99	0	2	0	0	9	0	0	0	4	-99	0	-99	-99
201501220036	2015	1	22	0	1	1	1	0	0	95	10	33.303566	44.371773	0	3	0	0	0	6	16	0	0	0	0	0	0	14	67	95	0	0	0	0	0	0	-99	0	1	0	0	8	0	0	0	4	-99	0	-99	-99
201501220037	2015	1	22	0	1	1	1	0	0	95	10	33.303566	44.371773	0	3	0	0	0	6	16	0	0	0	0	0	0	14	67	95	0	0	0	0	0	0	-99	0	2	0	0	6	0	0	0	4	-99	0	-99	-99
201501220038	2015	1	22	0	1	1	1	0	0	95	10	33.303566	44.371773	0	3	0	0	0	6	16	0	0	0	0	0	0	14	67	95	0	0	0	0	0	0	-99	0	3	0	0	10	0	0	0	4	-99	0	-99	-99
201501220039	2015	1	22	0	1	1	1	0	0	95	10	33.303566	44.371773	0	1	0	0	0	5	2	0	0	0	0	0	0	3	25	95	0	0	0	0	0	0	-99	0	1	0	0	2	0	0	1	3	-99	0	-99	-99
201501220040	2015	1	22	0	1	1	1	0	0	110	10	34.184605	36.424011	0	3	0	0	0	6	15	0	0	0	0	0	0	20	0	110	0	0	0	0	0	0	-99	0	0	0	0	0	0	0	0	4	-99	0	-99	-99
201501220041	2015	1	22	0	1	1	0	1	0	95	10	33.540672	44.251266	0	3	0	0	1	6	15	6	13	0	0	0	0	4	27	95	0	0	0	0	0	0	2	0	9	0	2	26	0	0	1	4	-99	0	-99	-99
201501220042	2015	1	22	0	1	1	1	0	0	95	10	33.303566	44.371773	0	3	0	0	0	6	16	0	0	0	0	0	0	1	2	95	0	0	0	0	0	0	-99	0	2	0	0	6	0	0	-9	4	-99	0	-99	-99
201501220043	2015	1	22	0	1	1	1	0	0	95	10	33.303566	44.371773	0	3	0	0	0	6	16	0	0	0	0	0	0	1	7	95	0	0	0	0	0	0	-99	0	1	0	0	10	0	0	-9	4	-99	0	-99	-99
201501220055	2015	1	22	0	1	1	1	0	0	92	6	9.829387	76.455537	0	3	7	0	0	6	17	8	18	0	0	0	0	14	69	92	0	0	0	0	0	0	300	0	0	0	0	1	0	0	1	4	-99	0	-99	-99
201501220077	2015	1	21	0	1	1	1	0	1	214	9	48.724888	38.631035	0	3	0	0	0	6	11	0	0	0	0	0	0	14	75	214	0	0	0	0	0	0	-99	0	0	0	0	0	0	0	1	3	-99	0	-99	-99
201501220084	2015	1	22	0	1	1	1	0	0	19	6	23.791275	90.418205	0	3	0	0	0	6	17	0	0	0	0	0	0	14	77	19	0	0	0	0	0	0	-99	0	0	0	0	1	0	0	-9	4	-99	0	-99	-99
201501220092	2015	1	22	0	1	1	1	0	0	155	10	31.502407	34.459743	0	3	0	0	0	6	16	0	0	0	0	0	0	22	109	155	0	0	0	0	0	0	-99	0	0	0	0	0	0	0	1	3	-99	0	-99	-99
201501220102	2015	1	22	0	1	1	1	0	0	153	6	30.582359	71.237938	0	2	0	0	0	5	5	0	0	0	0	0	0	14	77	153	0	0	0	0	0	0	1	0	0	0	0	0	0	0	0	4	-99	0	-99	-99
201501230012	2015	1	23	0	1	1	1	0	0	60	10	29.31053	30.84229	0	1	0	0	0	5	5	0	0	0	0	0	0	2	18	60	0	0	0	0	0	0	-99	0	0	0	0	0	0	0	1	3	-99	0	-99	-99
201501230018	2015	1	23	0	1	1	1	0	0	205	5	6.491822	101.3885	0	2	0	0	0	5	5	0	0	0	0	0	0	3	25	205	0	0	0	0	0	0	6	0	2	0	0	1	0	0	1	4	-99	0	-99	-99
201501230020	2015	1	23	0	1	1	1	0	0	153	6	32.298811	69.572493	0	7	0	0	0	8	18	0	0	0	0	0	0	10	0	153	0	0	0	0	0	0	-99	0	0	0	0	0	0	0	1	3	-99	0	-99	-99
201501230021	2015	1	23	0	1	1	0	1	0	228	10	12.825647	44.846416	0	2	0	0	0	5	5	0	0	0	0	0	0	4	35	228	0	0	0	0	0	0	-99	0	0	0	0	0	0	0	-9	4	-99	0	-99	-99
201501230025	2015	1	23	0	0	1	1	1	0	147	11	10.317786	9.846879	0	7	0	0	0	8	18	0	0	0	0	0	0	14	84	147	0	0	0	0	0	0	-99	0	0	0	0	0	0	0	1	3	-99	0	-99	-99
201501230026	2015	1	23	0	1	1	1	0	0	95	10	33.303566	44.371773	0	3	0	0	0	6	15	0	0	0	0	0	0	2	18	95	0	0	0	0	0	0	-99	0	1	0	0	0	0	0	1	3	-99	0	-99	-99
201501230028	2015	1	23	0	1	1	1	0	0	95	10	33.057991	44.354839	0	3	0	0	0	6	16	0	0	0	0	0	0	14	67	95	0	0	0	0	0	0	-99	0	1	0	0	6	0	0	0	4	-99	0	-99	-99
201501230029	2015	1	23	0	1	1	1	0	0	95	10	33.303566	44.371773	0	3	0	0	0	6	16	0	0	0	0	0	0	1	2	95	0	0	0	0	0	0	-99	0	2	0	0	11	0	0	-9	4	-99	0	-99	-99
201501230033	2015	1	23	0	1	1	1	0	0	95	10	33.303566	44.371773	0	3	0	0	0	6	11	0	0	0	0	0	0	14	75	95	0	0	0	0	0	0	-99	0	0	0	0	5	0	0	0	4	-99	0	-99	-99
201501230042	2015	1	23	0	1	1	1	0	0	19	6	24.633056	88.398099	1	3	0	0	0	6	17	0	0	0	0	0	0	1	7	19	0	0	0	0	0	0	-99	0	0	0	0	2	0	0	1	3	-99	0	-99	-99
201501230043	2015	1	23	0	1	1	0	1	0	153	6	33.95	70.963056	0	3	0	0	0	6	11	0	0	0	0	0	0	4	27	153	0	0	0	0	0	0	-99	0	0	0	0	0	0	0	1	4	-99	0	-99	-99
201501230049	2015	1	23	0	1	1	1	0	0	228	10	15.325443	44.211895	0	1	0	0	0	6	16	0	0	0	0	0	0	17	93	228	0	0	0	0	0	0	-99	0	0	0	0	0	0	0	1	3	-99	0	-99	-99
201501230052	2015	1	23	0	1	1	1	0	0	214	9	48.736645	39.226654	0	3	0	0	0	6	11	0	0	0	0	0	0	21	107	214	0	0	0	0	0	0	-99	0	0	0	0	0	0	0	1	4	-99	0	-99	-99
201501230066	2015	1	23	0	1	1	1	0	0	92	6	33.339413	75.933692	0	3	0	0	0	6	8	0	0	0	0	0	0	20	0	92	0	0	0	0	0	0	-99	0	0	0	0	0	0	0	0	4	-99	0	-99	-99
201501230069	2015	1	23	0	0	1	1	1	0	92	6	25.561346	84.666795	0	3	0	0	0	6	17	0	0	0	0	0	0	2	14	92	0	0	0	0	0	0	1	0	2	0	1	16	0	0	1	3	-99	0	-99	-99
201501230072	2015	1	23	0	1	1	1	0	0	92	6	26.47608	90.555218	0	3	0	0	0	6	16	0	0	0	0	0	0	20	0	92	0	0	0	0	0	0	-99	0	0	0	0	0	0	0	0	4	-99	0	-99	-99
201501230073	2015	1	23	1	1	1	0	1	0	113	10	180	180	0	6	0	0	0	9	23	0	0	0	0	0	0	4	34	113	0	0	0	0	0	0	-99	0	5	0	0	0	0	0	0	4	-99	1	5	0
201501230076	2015	1	23	0	1	1	0	1	0	60	10	31.126646	33.800865	0	2	0	0	0	5	4	0	0	0	0	0	0	4	34	60	0	0	0	0	0	0	-99	0	0	0	0	1	0	0	0	4	-99	0	-99	-99
201501240002	2015	1	24	0	1	1	1	0	0	113	10	32.867867	13.189067	0	2	0	0	0	5	5	0	0	0	0	0	0	7	47	422	3	25	113	0	0	0	-99	0	1	0	0	0	0	0	0	4	-99	0	-99	-99
201501240003	2015	1	24	0	1	1	1	0	0	60	10	29.311899	30.842973	0	1	0	0	0	5	5	0	0	0	0	0	0	2	18	60	0	0	0	0	0	0	-99	0	2	0	2	0	0	0	0	4	-99	0	-99	-99
201501240010	2015	1	24	0	1	1	1	0	0	4	6	31.60063	64.369652	0	1	0	0	0	5	5	0	0	0	0	0	0	3	25	4	0	0	0	0	0	0	-99	0	1	0	0	0	0	0	0	4	-99	0	-99	-99
201501240011	2015	1	24	0	1	1	1	0	0	147	11	4.741798	7.08392	0	3	2	0	0	6	28	5	5	0	0	0	0	14	84	147	0	0	0	0	0	0	-99	0	0	0	0	0	0	0	1	3	-99	0	-99	-99
201501240021	2015	1	24	0	1	1	1	0	0	92	6	24.798346	93.94043	0	3	0	0	0	6	16	0	0	0	0	0	0	20	0	92	0	0	0	0	0	0	-99	0	0	0	0	0	0	0	-9	4	-99	0	-99	-99
201501240024	2015	1	24	0	1	1	1	0	0	95	10	35.470616	44.395746	0	3	0	0	0	6	16	0	0	0	0	0	0	4	27	95	14	67	95	0	0	0	-99	0	0	0	0	2	0	0	0	4	-99	0	-99	-99
201501240025	2015	1	24	0	1	1	1	0	0	95	10	33.303566	44.371773	0	3	0	0	0	6	16	0	0	0	0	0	0	1	7	95	0	0	0	0	0	0	-99	0	1	0	0	5	0	0	-9	4	-99	0	-99	-99
201501240027	2015	1	24	0	1	1	1	0	0	95	10	33.303566	44.371773	0	3	0	0	0	6	16	0	0	0	0	0	0	14	67	95	0	0	0	0	0	0	-99	0	3	0	0	6	0	0	-9	4	-99	0	-99	-99
201501240035	2015	1	24	0	1	1	1	0	0	95	10	33.303566	44.371773	0	3	0	0	0	6	16	0	0	0	0	0	0	1	2	95	0	0	0	0	0	0	-99	0	3	0	0	8	0	0	-9	4	-99	0	-99	-99
201501240036	2015	1	24	0	1	1	1	0	0	95	10	33.303566	44.371773	0	3	0	0	0	6	16	0	0	0	0	0	0	1	7	95	0	0	0	0	0	0	-99	0	3	0	0	7	0	0	-9	4	-99	0	-99	-99
201501240038	2015	1	24	0	1	1	1	0	0	95	10	33.057991	44.354839	0	3	0	0	0	6	15	0	0	0	0	0	0	14	73	95	0	0	0	0	0	0	-99	0	0	0	0	4	0	0	1	3	-99	0	-99	-99
201501240066	2015	1	24	0	1	1	1	0	0	60	10	30.576442	31.503931	0	3	0	0	0	6	16	0	0	0	0	0	0	19	100	60	0	0	0	0	0	0	-99	0	0	0	0	1	0	0	1	4	-99	0	-99	-99
201501240068	2015	1	24	0	1	1	1	1	0	153	6	33.81752	70.655285	0	3	0	0	0	6	16	0	0	0	0	0	0	17	94	153	0	0	0	0	0	0	-99	0	2	0	0	2	0	0	-9	4	-99	0	-99	-99
201501240070	2015	1	24	0	1	1	1	0	0	153	6	33.780827	72.725159	0	3	0	0	0	6	15	0	0	0	0	0	0	20	0	153	0	0	0	0	0	0	2	2	0	0	0	0	0	0	0	4	-99	0	-99	-99
201501240071	2015	1	24	0	1	1	1	0	0	4	6	34.453672	70.499771	0	3	0	0	1	6	13	0	0	0	0	0	0	20	0	0	0	0	0	0	0	0	2	2	0	0	0	0	0	0	0	4	-99	0	-99	-99
201501240073	2015	1	24	0	1	1	1	0	0	19	6	24.359901	90.705432	0	7	0	0	0	8	19	0	0	0	0	0	0	19	99	19	0	0	0	0	0	0	-99	0	0	0	0	2	0	0	1	3	-99	0	-99	-99
201501240079	2015	1	24	0	1	1	1	0	0	19	6	23.791275	90.418205	0	3	0	0	0	6	17	0	0	0	0	0	0	8	49	19	0	0	0	0	0	0	-99	0	0	0	0	0	0	0	-9	4	-99	0	-99	-99
201501240080	2015	1	24	1	1	1	1	0	0	113	10	180	180	0	6	0	0	0	5	5	0	0	0	0	0	0	1	1	113	0	0	0	0	0	0	-99	0	0	0	0	0	0	0	0	4	-99	1	2	0
201501240088	2015	1	24	0	1	1	1	0	0	147	11	6.444119	7.502617	0	3	0	0	0	6	17	0	0	0	0	0	0	14	82	147	0	0	0	0	0	0	-99	0	0	0	0	0	0	0	1	3	-99	0	-99	-99
201501240090	2015	1	24	0	1	1	1	0	0	14	12	-27.581562	151.933834	0	7	0	0	0	8	18	0	0	0	0	0	0	15	86	14	0	0	0	0	0	0	-99	0	0	0	0	0	0	0	-9	4	-99	0	-99	-99
201501240095	2015	1	24	0	1	1	1	0	0	60	10	31.250196	34.24128	1	3	0	0	0	6	16	0	0	0	0	0	0	4	34	60	0	0	0	0	0	0	-99	0	0	0	0	0	0	0	0	4	-99	0	-99	-99
201501250006	2015	1	25	0	1	1	1	0	0	153	6	29.548279	67.879189	0	3	0	0	0	6	16	0	0	0	0	0	0	20	0	153	0	0	0	0	0	0	-99	0	0	0	0	0	0	0	0	4	-99	0	-99	-99
201501250010	2015	1	25	1	1	1	1	1	0	113	10	32.760742	21.757212	0	6	0	0	0	5	5	0	0	0	0	0	0	2	18	113	0	0	0	0	0	0	-99	0	0	0	0	1	0	0	0	4	-99	1	1	0
201501250011	2015	1	25	0	1	1	1	1	0	113	10	32.069286	20.151144	0	3	0	0	0	6	11	0	0	0	0	0	0	14	76	113	0	0	0	0	0	0	-99	0	6	0	0	0	0	0	1	3	-99	0	-99	-99
201501250019	2015	1	25	0	1	1	1	0	0	60	10	30.848099	30.343551	0	3	0	0	0	6	16	0	0	0	0	0	0	21	107	60	0	0	0	0	0	0	-99	0	2	0	2	0	0	0	-9	4	-99	0	-99	-99
201501250022	2015	1	25	0	1	1	1	0	0	60	10	31.091713	31.488465	0	3	0	0	0	6	16	0	0	0	0	0	0	19	100	60	0	0	0	0	0	0	-99	0	0	0	0	0	0	0	0	4	-99	0	-99	-99
201501250023	2015	1	25	0	1	1	1	0	0	60	10	29.311707	30.838812	0	3	0	0	0	6	16	0	0	0	0	0	0	20	0	60	0	0	0	0	0	0	-99	0	0	0	0	0	0	0	1	4	-99	0	-99	-99
201501250024	2015	1	25	0	1	1	1	0	0	60	10	30.084629	31.334314	0	2	0	0	0	5	5	0	0	0	0	0	0	3	24	60	0	0	0	0	0	0	-99	0	2	0	0	0	0	0	0	4	-99	0	-99	-99
201501250028	2015	1	25	0	1	1	0	1	0	123	11	16.573373	-3.373289	1	2	0	0	0	5	5	0	0	0	0	0	0	4	34	123	0	0	0	0	0	0	-99	0	2	0	0	3	0	0	1	3	-99	0	-99	-99
201501250032	2015	1	25	0	1	1	1	0	0	19	6	22.638738	90.201692	0	7	0	0	0	8	19	0	0	0	0	0	0	2	15	19	0	0	0	0	0	0	2	0	0	0	0	0	0	0	1	3	-99	0	-99	-99
201501250033	2015	1	25	0	1	1	1	0	0	110	10	34.396358	35.895833	0	1	0	0	0	5	5	0	0	0	0	0	0	3	25	110	0	0	0	0	0	0	1	0	1	0	0	0	0	0	1	3	-99	0	-99	-99
201501250048	2015	1	25	0	1	1	1	0	0	95	10	33.303566	44.371773	0	3	0	0	0	6	16	0	0	0	0	0	0	14	74	95	0	0	0	0	0	0	-99	0	2	0	0	8	0	0	-9	4	-99	0	-99	-99
201501250049	2015	1	25	0	1	1	1	0	0	95	10	33.303566	44.371773	0	3	0	0	0	6	16	0	0	0	0	0	0	1	2	95	0	0	0	0	0	0	-99	0	1	0	0	7	0	0	1	3	-99	0	-99	-99
201501250050	2015	1	25	0	1	1	1	0	0	95	10	33.303566	44.371773	0	3	0	0	0	6	16	0	0	0	0	0	0	1	2	95	0	0	0	0	0	0	-99	0	3	0	0	11	0	0	-9	4	-99	0	-99	-99
201501250060	2015	1	25	0	1	1	1	0	0	95	10	33.303566	44.371773	0	3	0	0	0	6	16	0	0	0	0	0	0	1	2	95	0	0	0	0	0	0	-99	0	5	0	0	12	0	0	1	3	-99	0	-99	-99
201501250062	2015	1	25	0	1	1	1	0	0	92	6	24.798346	93.94043	0	3	0	0	0	6	16	0	0	0	0	0	0	20	0	92	0	0	0	0	0	0	-99	0	0	0	0	0	0	0	0	4	-99	0	-99	-99
201501250068	2015	1	25	0	1	1	1	0	0	153	6	34.14658	71.743538	0	3	0	0	0	6	16	0	0	0	0	0	0	20	0	153	0	0	0	0	0	0	-99	0	0	0	0	0	0	0	0	4	-99	0	-99	-99
201501250073	2015	1	25	0	1	1	1	0	1	60	10	30.597245	30.987632	0	3	0	0	0	6	16	0	0	0	0	0	0	21	107	60	0	0	0	0	0	0	-99	0	0	0	0	0	0	0	1	4	-99	0	-99	-99
201501250074	2015	1	25	0	1	1	1	0	1	60	10	30.597245	30.987632	0	3	0	0	0	6	16	0	0	0	0	0	0	21	107	60	0	0	0	0	0	0	-99	0	0	0	0	0	0	0	1	4	-99	0	-99	-99
201501250083	2015	1	25	0	1	1	1	0	0	60	10	31.126646	33.800865	0	3	0	0	0	6	16	0	0	0	0	0	0	20	0	60	0	0	0	0	0	0	-99	0	0	0	0	0	0	0	0	4	-99	0	-99	-99
201501260001	2015	1	26	0	1	1	1	0	0	4	6	34.516895	69.147011	0	1	0	0	0	5	5	0	0	0	0	0	0	2	14	4	0	0	0	0	0	0	-99	0	1	0	0	0	0	0	1	3	-99	0	-99	-99
201501260006	2015	1	26	0	1	1	1	0	0	113	10	30.491793	18.547119	0	3	0	0	0	6	11	0	0	0	0	0	0	14	76	113	0	0	0	0	0	0	-99	0	0	0	0	0	0	0	1	3	-99	0	-99	-99
201501260024	2015	1	26	0	1	1	1	0	0	4	6	34.417122	70.449593	0	3	0	0	0	6	16	0	0	0	0	0	0	1	8	4	0	0	0	0	0	0	-99	0	0	0	0	8	0	0	1	3	-99	0	-99	-99
201501260029	2015	1	26	0	1	1	1	0	0	205	5	6.412174	101.672656	1	2	0	0	0	5	2	0	0	0	0	0	0	3	22	205	0	0	0	0	0	0	2	0	0	0	0	0	0	0	1	3	-99	0	-99	-99
201501260030	2015	1	26	0	1	1	0	1	0	205	5	6.575263	101.63271	1	2	0	0	0	5	2	0	0	0	0	0	0	4	27	205	0	0	0	0	0	0	2	0	0	0	0	0	0	0	1	3	-99	0	-99	-99
201501260031	2015	1	26	0	1	1	1	0	0	153	6	33.590603	71.44062	0	1	0	0	0	5	5	0	0	0	0	0	0	3	25	153	0	0	0	0	0	0	-99	0	1	0	0	0	0	0	-9	4	-99	0	-99	-99
201501260032	2015	1	14	0	1	1	1	0	0	153	6	31.834328	70.90905	0	3	0	0	0	6	7	0	0	0	0	0	0	3	25	153	0	0	0	0	0	0	-99	0	4	0	0	0	0	0	1	3	-99	0	-99	-99
201501260041	2015	1	26	0	1	1	1	0	0	205	5	6.540649	101.281022	0	2	0	0	0	5	5	0	0	0	0	0	0	14	67	205	0	0	0	0	0	0	-99	0	0	0	0	1	0	0	0	4	-99	0	-99	-99
201501260042	2015	1	26	0	1	1	1	0	0	95	10	33.375759	44.702866	0	3	0	0	0	6	16	0	0	0	0	0	0	1	7	95	0	0	0	0	0	0	-99	0	2	0	0	7	0	0	1	3	-99	0	-99	-99
201501260045	2015	1	26	0	1	1	1	0	0	60	10	31.212225	34.117065	0	2	0	0	0	5	5	0	0	0	0	0	0	14	67	60	0	0	0	0	0	0	-99	0	3	0	0	0	0	0	0	4	-99	0	-99	-99
201501260046	2015	1	26	0	1	1	1	0	0	95	10	33.057991	44.354839	0	3	0	0	0	6	29	0	0	0	0	0	0	14	77	95	0	0	0	0	0	0	-99	0	1	0	0	2	0	0	1	3	-99	0	-99	-99
201501260047	2015	1	26	0	1	1	1	0	0	95	10	33.291944	44.065556	0	3	0	0	0	6	16	0	0	0	0	0	0	14	74	95	0	0	0	0	0	0	-99	0	2	0	0	4	0	0	-9	4	-99	0	-99	-99
201501260048	2015	1	26	0	1	1	1	0	0	95	10	34.021822	44.933508	0	3	0	0	0	6	16	0	0	0	0	0	0	17	94	95	0	0	0	0	0	0	-99	0	3	0	0	4	0	0	0	4	-99	0	-99	-99
201501260051	2015	1	26	0	1	1	1	0	0	95	10	33.303566	44.371773	0	2	0	0	0	5	5	0	0	0	0	0	0	6	42	215	0	0	0	0	0	0	-99	0	0	0	0	2	0	0	1	4	-99	0	-99	-99
201501260052	2015	1	26	1	1	1	1	0	1	95	10	36.803982	42.093945	1	6	2	7	0	5	5	8	18	0	0	0	0	14	75	95	0	0	0	0	0	0	-99	0	7	0	0	0	0	0	1	3	-99	1	7	0
201501260053	2015	1	26	1	1	1	1	0	1	95	10	36.803982	42.093945	1	6	2	7	0	5	5	8	18	0	0	0	0	14	75	95	0	0	0	0	0	0	-99	0	7	0	0	0	0	0	1	3	-99	1	7	0
201501260054	2015	1	26	1	1	1	1	0	1	95	10	36.595833	41.866111	0	6	2	7	0	5	5	8	18	0	0	0	0	14	75	95	0	0	0	0	0	0	-99	0	6	0	0	0	0	0	1	3	-99	1	7	0
201501260055	2015	1	26	1	1	1	1	0	1	95	10	36.584045	41.951962	0	6	2	7	0	5	5	8	18	0	0	0	0	14	75	95	0	0	0	0	0	0	-99	0	5	0	0	0	0	0	1	3	-99	1	6	0
201501260059	2015	1	26	0	1	1	1	0	0	92	6	26.261368	90.175465	0	3	0	0	0	6	16	0	0	0	0	0	0	20	0	92	0	0	0	0	0	0	-99	0	0	0	0	0	0	0	0	4	-99	0	-99	-99
201501260067	2015	1	26	0	1	1	1	0	0	138	5	25.616546	96.316667	0	3	0	0	0	6	16	0	0	0	0	0	0	1	8	138	0	0	0	0	0	0	-99	0	0	0	0	2	0	0	-9	4	-99	0	-99	-99
201501260068	2015	1	26	0	1	1	1	0	0	153	6	24.891115	67.143311	0	2	0	0	0	5	5	0	0	0	0	0	0	3	25	153	14	77	153	0	0	0	-99	0	1	0	0	0	0	0	0	4	-99	0	-99	-99
201501260072	2015	1	26	0	1	1	1	0	0	19	6	23.879993	90.273117	1	3	0	0	0	6	17	0	0	0	0	0	0	19	99	19	0	0	0	0	0	0	-99	0	0	0	0	2	0	0	1	3	-99	0	-99	-99
201501260075	2015	1	26	0	1	1	1	0	0	19	6	22.639823	90.198443	0	7	0	0	0	8	19	0	0	0	0	0	0	19	99	19	0	0	0	0	0	0	-99	0	0	0	0	0	0	0	1	3	-99	0	-99	-99
201501260081	2015	1	28	0	1	1	1	0	0	214	9	48.434017	38.221252	0	3	0	0	0	6	11	0	0	0	0	0	0	21	106	214	21	107	214	0	0	0	-99	0	0	0	0	0	0	0	1	4	-99	0	-99	-99
201501260082	2015	1	25	0	1	1	1	0	0	60	10	31.126646	33.800865	0	3	0	0	0	6	16	0	0	0	0	0	0	1	7	60	0	0	0	0	0	0	-99	0	0	0	0	0	0	0	0	4	-99	0	-99	-99
201501260083	2015	1	26	0	1	1	1	1	0	214	9	47.981647	37.762325	0	3	0	0	0	6	11	0	0	0	0	0	0	21	107	214	0	0	0	0	0	0	-99	0	0	0	0	0	0	0	1	4	-99	0	-99	-99
201501260084	2015	1	26	0	1	1	1	0	0	214	9	48.660713	39.470314	0	3	0	0	0	6	11	0	0	0	0	0	0	14	75	214	0	0	0	0	0	0	-99	0	2	0	0	0	0	0	-9	4	-99	0	-99	-99
201501260085	2015	1	26	0	1	1	1	0	0	214	9	48.78764	39.307636	0	3	0	0	0	6	11	0	0	0	0	0	0	14	75	214	0	0	0	0	0	0	-99	0	0	0	0	0	0	0	-9	4	-99	0	-99	-99
201501260087	2015	1	27	0	1	1	1	0	0	153	6	28.587601	68.047751	0	3	0	0	0	6	16	0	0	0	0	0	0	4	27	153	0	0	0	0	0	0	-99	0	0	0	0	0	0	0	0	4	-99	0	-99	-99
201501270004	2015	1	27	1	1	1	1	0	0	153	6	30.200819	66.994354	0	6	0	0	0	5	5	0	0	0	0	0	0	1	10	153	0	0	0	0	0	0	30	0	0	0	0	0	0	0	0	4	-99	1	7	0
201501270007	2015	1	27	0	1	1	1	0	0	153	6	29.475448	67.651386	0	3	0	0	0	6	16	0	0	0	0	0	0	20	0	153	0	0	0	0	0	0	-99	0	0	0	0	0	0	0	0	4	-99	0	-99	-99
201501270013	2015	1	27	0	1	1	1	0	0	160	5	7.141785	124.382019	0	3	0	0	0	6	16	0	0	0	0	0	0	21	107	160	0	0	0	0	0	0	-99	0	0	0	0	0	0	0	0	4	-99	0	-99	-99
201501270015	2015	1	27	0	1	1	0	1	0	205	5	6.635746	101.269742	0	3	0	0	0	6	12	0	0	0	0	0	0	4	29	205	0	0	0	0	0	0	-99	0	0	0	0	3	0	0	1	3	-99	0	-99	-99
201501270016	2015	1	27	0	1	1	1	0	0	60	10	30.329237	31.216847	0	3	0	0	0	6	16	0	0	0	0	0	0	3	24	60	14	67	60	0	0	0	-99	0	0	0	0	8	0	0	0	4	-99	0	-99	-99
201501270017	2015	1	27	0	1	1	1	0	0	60	10	30.084629	31.334314	0	3	0	0	0	6	16	0	0	0	0	0	0	2	14	60	0	0	0	0	0	0	-99	0	0	0	0	0	0	0	0	4	-99	0	-99	-99
201501270018	2015	1	27	0	1	1	1	0	0	60	10	31.200092	29.918739	0	3	0	0	0	6	16	0	0	0	0	0	0	20	0	60	0	0	0	0	0	0	-99	0	0	0	0	0	0	0	0	4	-99	0	-99	-99
201501270019	2015	1	27	0	1	1	1	0	1	60	10	29.308327	30.844256	0	3	0	0	0	6	16	0	0	0	0	0	0	20	0	60	0	0	0	0	0	0	-99	0	0	0	0	0	0	0	0	4	-99	0	-99	-99
201501270020	2015	1	27	0	1	1	1	0	0	153	6	26.966747	64.100537	0	3	0	0	0	6	11	0	0	0	0	0	0	21	107	153	0	0	0	0	0	0	-99	0	0	0	0	0	0	0	0	4	-99	0	-99	-99
201501270023	2015	1	27	0	1	1	1	0	0	60	10	31.199901	29.918739	0	2	0	0	0	8	19	0	0	0	0	0	0	3	22	60	0	0	0	0	0	0	-99	0	0	0	0	0	0	0	1	3	-99	0	-99	-99
201501270024	2015	1	27	0	1	1	1	0	1	60	10	29.311707	30.838812	0	3	0	0	0	6	16	0	0	0	0	0	0	2	14	60	0	0	0	0	0	0	-99	0	0	0	0	0	0	0	-9	4	-99	0	-99	-99
201501270026	2015	1	27	0	1	1	1	0	1	60	10	29.311707	30.838812	0	3	0	0	0	6	16	0	0	0	0	0	0	14	67	60	0	0	0	0	0	0	-99	0	0	0	0	1	0	0	-9	4	-99	0	-99	-99
201501270027	2015	1	27	0	1	1	1	0	1	60	10	29.311707	30.838812	0	3	0	0	0	6	16	0	0	0	0	0	0	20	0	60	0	0	0	0	0	0	-99	0	0	0	0	0	0	0	0	4	-99	0	-99	-99
201501270028	2015	1	27	0	1	1	1	0	1	60	10	29.311707	30.838812	0	3	0	0	0	6	16	0	0	0	0	0	0	20	0	60	0	0	0	0	0	0	-99	0	0	0	0	0	0	0	0	4	-99	0	-99	-99
201501270029	2015	1	27	0	1	1	1	0	1	60	10	29.311707	30.838812	0	3	0	0	0	6	16	0	0	0	0	0	0	20	0	60	0	0	0	0	0	0	-99	0	0	0	0	0	0	0	0	4	-99	0	-99	-99
201501270030	2015	1	27	0	1	1	1	0	1	60	10	29.311707	30.838812	0	3	0	0	0	6	16	0	0	0	0	0	0	20	0	60	0	0	0	0	0	0	-99	0	0	0	0	0	0	0	0	4	-99	0	-99	-99
201501270031	2015	1	27	0	1	1	1	0	1	60	10	24.088938	32.899829	0	3	0	0	0	6	16	0	0	0	0	0	0	20	0	60	0	0	0	0	0	0	-99	0	0	0	0	0	0	0	0	4	-99	0	-99	-99
201501270032	2015	1	27	0	1	1	1	0	0	60	10	31.106367	30.942002	0	3	0	0	0	6	16	0	0	0	0	0	0	20	0	60	0	0	0	0	0	0	-99	0	0	0	0	0	0	0	0	4	-99	0	-99	-99
201501270033	2015	1	27	0	1	1	1	0	1	60	10	30.597245	30.987632	0	3	0	0	0	6	16	0	0	0	0	0	0	20	0	60	0	0	0	0	0	0	-99	0	0	0	0	0	0	0	0	4	-99	0	-99	-99
201501270036	2015	1	27	0	1	1	1	0	0	95	10	33.303566	44.371773	0	3	0	0	0	6	15	0	0	0	0	0	0	14	67	95	0	0	0	0	0	0	-99	0	1	0	0	5	0	0	1	3	-99	0	-99	-99
201501270038	2015	1	27	0	1	1	1	0	0	95	10	33.303566	44.371773	0	3	0	0	0	6	16	0	0	0	0	0	0	14	74	95	0	0	0	0	0	0	-99	0	2	0	0	8	0	0	-9	4	-99	0	-99	-99
201501270039	2015	1	27	0	1	1	1	0	0	95	10	33.303566	44.371773	0	3	0	0	0	6	16	0	0	0	0	0	0	14	67	95	0	0	0	0	0	0	-99	0	1	0	0	6	0	0	0	4	-99	0	-99	-99
201501270048	2015	1	27	0	1	1	1	0	0	4	6	34.155556	70.598611	0	1	0	0	0	5	5	0	0	0	0	0	0	14	68	4	0	0	0	0	0	0	-99	0	1	0	0	1	0	0	0	4	-99	0	-99	-99
201501270054	2015	1	27	0	1	1	1	0	0	153	6	24.976461	66.945547	0	3	0	0	0	6	16	0	0	0	0	0	0	20	0	153	0	0	0	0	0	0	-99	0	0	0	0	0	0	0	0	4	-99	0	-99	-99
201501270055	2015	1	27	0	1	1	1	0	0	155	10	31.502407	34.459743	0	7	0	0	0	8	18	0	0	0	0	0	0	22	109	155	0	0	0	0	0	0	-99	0	0	0	0	0	0	0	1	3	-99	0	-99	-99
201501270061	2015	1	27	0	1	1	0	1	0	160	5	7.709312	125.222853	0	3	0	0	0	6	8	0	0	0	0	0	0	4	29	160	0	0	0	0	0	0	-99	0	1	0	0	5	0	0	0	4	-99	0	-99	-99
201501270062	2015	1	27	0	1	1	1	0	0	19	6	22.61011	91.663727	0	7	0	0	0	8	19	0	0	0	0	0	0	1	7	19	0	0	0	0	0	0	-99	0	0	0	0	2	0	0	1	3	-99	0	-99	-99
201501270063	2015	1	27	0	1	1	1	0	0	153	6	34.006004	71.53743	0	3	0	0	0	6	7	0	0	0	0	0	0	3	23	153	0	0	0	0	0	0	-99	1	0	0	0	0	0	0	0	4	-99	0	-99	-99
201501270068	2015	1	27	0	1	1	1	0	0	160	5	14.733546	120.960947	0	2	0	0	0	5	3	0	0	0	0	0	0	2	18	160	0	0	0	0	0	0	2	0	1	0	0	0	0	0	1	3	-99	0	-99	-99
201501270072	2015	1	27	0	1	1	0	1	0	153	6	33.695975	70.336069	0	3	0	0	0	6	8	0	0	0	0	0	0	4	39	153	0	0	0	0	0	0	-99	0	0	0	0	1	0	0	0	4	-99	0	-99	-99
201501270073	2015	1	27	0	1	1	1	0	0	60	10	30.044245	31.235845	0	3	0	0	0	6	16	0	0	0	0	0	0	3	25	60	0	0	0	0	0	0	-99	0	0	0	0	0	0	0	0	4	-99	0	-99	-99
201501270074	2015	1	27	0	1	1	1	0	1	60	10	28.766622	29.232078	0	3	0	0	0	6	16	0	0	0	0	0	0	20	0	60	0	0	0	0	0	0	-99	0	0	0	0	0	0	0	0	4	-99	0	-99	-99
201501270075	2015	1	27	0	1	1	1	0	1	60	10	29.066127	31.099384	0	3	0	0	0	6	16	0	0	0	0	0	0	20	0	60	0	0	0	0	0	0	-99	0	0	0	0	0	0	0	0	4	-99	0	-99	-99
201501270076	2015	1	27	0	1	1	1	0	1	60	10	28.086801	30.762019	0	3	0	0	0	6	16	0	0	0	0	0	0	20	0	60	0	0	0	0	0	0	-99	0	0	0	0	0	0	0	0	4	-99	0	-99	-99
201501280002	2015	1	28	0	1	1	1	0	0	153	6	30.697964	68.354795	0	9	0	0	0	13	0	0	0	0	0	0	0	3	22	153	0	0	0	0	0	0	25	0	0	0	0	0	0	0	1	3	-99	0	-99	-99
201501280012	2015	1	28	0	1	1	1	0	0	113	10	32.867867	13.189067	0	3	0	0	0	6	7	0	0	0	0	0	0	8	49	113	0	0	0	0	0	0	-99	0	0	0	0	0	0	0	0	4	-99	0	-99	-99
201501280013	2015	1	28	0	1	1	0	1	0	228	10	13.985013	45.558479	1	3	0	0	0	6	16	0	0	0	0	0	0	4	35	228	0	0	0	0	0	0	-99	0	0	0	0	0	0	0	1	4	-99	0	-99	-99
201501280018	2015	1	28	0	1	1	1	0	0	228	10	13.762068	44.140316	0	1	0	0	0	6	7	0	0	0	0	0	0	14	84	228	0	0	0	0	0	0	-99	0	0	0	0	0	0	0	1	3	-99	0	-99	-99
201501280022	2015	1	28	0	1	1	1	0	0	4	6	34.307267	62.324064	0	3	0	0	0	6	16	0	0	0	0	0	0	3	22	4	0	0	0	0	0	0	-99	0	1	0	0	2	0	0	-9	4	-99	0	-99	-99
201501280023	2015	1	28	0	1	1	1	0	0	4	6	34.115677	70.463646	0	5	3	0	0	6	16	5	5	0	0	0	0	8	49	4	0	0	0	0	0	0	-99	0	0	0	0	0	0	0	1	3	-99	1	-99	0
201501280026	2015	1	28	0	1	1	1	0	0	205	5	6.869267	101.317581	1	3	0	0	0	6	12	0	0	0	0	0	0	4	29	205	8	48	205	0	0	0	-99	0	0	0	0	0	0	0	1	3	-99	0	-99	-99
201501280031	2015	1	28	0	1	1	1	0	0	19	6	23.791275	90.418205	0	1	0	0	0	8	19	0	0	0	0	0	0	2	14	19	0	0	0	0	0	0	1	0	0	0	0	1	0	0	-9	4	-99	0	-99	-99
201501280033	2015	1	28	0	1	1	0	1	1	97	10	33.272607	35.623637	0	3	0	0	0	6	11	0	0	0	0	0	0	4	34	97	0	0	0	0	0	0	-99	0	0	0	0	0	0	0	-9	4	-99	0	-99	-99
201501280034	2015	1	28	0	1	1	1	0	1	97	10	33.272607	35.623637	0	3	0	0	0	6	11	0	0	0	0	0	0	14	76	97	0	0	0	0	0	0	-99	0	0	0	0	0	0	0	-9	4	-99	0	-99	-99
201501280035	2015	1	28	0	1	1	1	0	0	60	10	26.154981	32.716012	0	3	0	0	0	6	7	6	16	0	0	0	0	20	0	60	0	0	0	0	0	0	-99	0	0	0	0	0	0	0	0	4	-99	0	-99	-99
201501280036	2015	1	28	0	1	1	1	0	0	60	10	30.084629	31.334314	0	3	0	0	0	6	16	0	0	0	0	0	0	19	101	60	0	0	0	0	0	0	-99	0	0	0	0	0	0	0	0	4	-99	0	-99	-99
201501280042	2015	1	28	0	1	1	1	0	0	19	6	23.791275	90.418205	0	3	0	0	0	6	16	0	0	0	0	0	0	8	49	19	0	0	0	0	0	0	-99	0	0	0	0	1	0	0	-9	4	-99	0	-99	-99
201501280043	2015	1	28	0	1	1	1	0	0	19	6	23.780071	90.409142	0	3	0	0	0	6	16	0	0	0	0	0	0	14	68	19	0	0	0	0	0	0	-99	0	0	0	0	1	0	0	-9	4	-99	0	-99	-99
201501280044	2015	1	28	0	1	1	1	0	0	95	10	34.054201	44.893227	0	3	0	0	0	6	17	0	0	0	0	0	0	3	25	95	4	34	95	0	0	0	-99	0	2	0	0	2	0	0	1	3	-99	0	-99	-99
201501280052	2015	1	28	0	1	1	1	0	0	60	10	30.725416	31.669928	0	3	0	0	0	6	16	0	0	0	0	0	0	1	3	60	0	0	0	0	0	0	-99	0	0	0	0	0	0	0	-9	4	-99	0	-99	-99
201501280054	2015	1	28	0	1	1	1	0	0	153	6	32.987347	70.602524	0	3	0	0	0	6	16	0	0	0	0	0	0	20	0	153	0	0	0	0	0	0	-99	0	0	0	0	0	0	0	0	4	-99	0	-99	-99
201501290011	2015	1	29	0	1	1	1	0	0	60	10	31.265289	32.301866	0	3	0	0	0	6	16	0	0	0	0	0	0	21	107	60	0	0	0	0	0	0	1	0	1	0	1	0	0	0	-9	4	-99	0	-99	-99
201501290024	2015	1	29	0	1	1	1	0	0	4	6	34.417122	70.449593	0	3	0	0	0	6	15	0	0	0	0	0	0	8	49	4	0	0	0	0	0	0	-99	0	1	0	0	2	0	0	-9	4	-99	0	-99	-99
201501290025	2015	1	28	1	1	1	1	0	0	228	10	12.825647	44.846416	0	6	0	0	0	5	5	0	0	0	0	0	0	14	67	69	0	0	0	0	0	0	-99	0	0	0	0	0	0	0	0	4	-99	1	1	0
201501290040	2015	1	29	0	1	1	1	0	0	205	5	6.827728	101.178725	1	2	0	0	0	5	5	0	0	0	0	0	0	3	23	205	0	0	0	0	0	0	-99	0	1	0	0	2	0	0	-9	4	-99	0	-99	-99
201501290045	2015	1	29	0	1	1	1	0	0	95	10	33.057991	44.354839	0	3	0	0	0	6	16	0	0	0	0	0	0	1	6	95	0	0	0	0	0	0	-99	0	2	0	0	10	0	0	-9	4	-99	0	-99	-99
201501290047	2015	1	29	0	1	1	1	0	0	95	10	34.373264	43.76318	0	3	0	0	0	6	17	0	0	0	0	0	0	17	94	95	0	0	0	0	0	0	-99	0	9	0	0	4	0	0	1	3	-99	0	-99	-99
201501290049	2015	1	29	0	1	1	1	0	0	95	10	33.589786	44.266976	0	3	0	0	1	6	13	0	0	0	0	0	0	17	94	95	0	0	0	0	0	0	2	0	9	0	2	21	0	0	0	4	-99	0	-99	-99
201501290051	2015	1	29	0	1	1	1	0	1	95	10	32.982933	44.361595	0	3	0	0	0	6	16	0	0	0	0	0	0	14	67	95	0	0	0	0	0	0	-99	0	1	0	0	1	0	0	0	4	-99	0	-99	-99
201501290052	2015	1	29	0	1	1	1	0	1	95	10	32.982933	44.361595	0	3	0	0	0	6	16	0	0	0	0	0	0	14	67	95	0	0	0	0	0	0	-99	0	0	0	0	4	0	0	0	4	-99	0	-99	-99
201501290053	2015	1	29	0	1	1	1	0	0	95	10	33.540672	44.251266	0	3	0	0	0	6	16	0	0	0	0	0	0	4	29	95	14	67	95	0	0	0	-99	0	1	0	0	6	0	0	0	4	-99	0	-99	-99
201501290058	2015	1	29	0	1	1	0	1	0	95	10	33.31065	44.038208	0	2	0	0	0	5	5	0	0	0	0	0	0	4	36	95	0	0	0	0	0	0	-99	0	3	0	0	8	0	0	0	4	-99	0	-99	-99
201501290059	2015	1	29	0	1	1	1	0	0	95	10	33.669689	44.381317	0	3	0	0	1	6	15	0	0	0	0	0	0	3	24	95	14	67	95	0	0	0	1	0	4	0	1	9	0	0	0	4	-99	0	-99	-99
201501290061	2015	1	29	0	1	1	1	0	1	60	10	31.265289	32.301866	0	3	0	0	0	6	17	0	0	0	0	0	0	19	99	60	0	0	0	0	0	0	-99	0	0	0	0	2	0	0	1	3	-99	0	-99	-99
201501290062	2015	1	29	0	1	1	1	0	1	60	10	31.263388	32.264418	0	3	0	0	0	6	16	0	0	0	0	0	0	1	1	60	0	0	0	0	0	0	-99	0	0	0	0	0	0	0	1	3	-99	0	-99	-99
201501290063	2015	1	29	0	1	1	1	0	0	60	10	30.329237	31.216847	0	7	0	0	0	8	18	0	0	0	0	0	0	2	21	60	0	0	0	0	0	0	-99	0	0	0	0	0	0	0	1	3	-99	0	-99	-99
201501290064	2015	1	29	0	1	1	1	0	0	60	10	29.311745	30.83781	0	3	0	0	0	6	16	0	0	0	0	0	0	19	100	60	0	0	0	0	0	0	-99	0	0	0	0	0	0	0	1	4	-99	0	-99	-99
201501290066	2015	1	29	0	1	1	1	0	0	155	10	31.502407	34.459743	0	3	0	0	0	6	7	0	0	0	0	0	0	2	18	155	0	0	0	0	0	0	-99	0	0	0	0	0	0	0	0	4	-99	0	-99	-99
201501290068	2015	1	29	0	1	1	1	0	0	19	6	22.814661	89.556688	0	1	0	0	0	6	17	0	0	0	0	0	0	3	25	19	0	0	0	0	0	0	-99	0	0	0	0	0	0	0	-9	4	-99	0	-99	-99
201501290069	2015	1	29	0	1	1	1	0	0	19	6	22.814661	89.556688	0	3	0	0	0	6	17	0	0	0	0	0	0	20	0	19	0	0	0	0	0	0	-99	0	0	0	0	0	0	0	-9	4	-99	0	-99	-99
201501290072	2015	1	29	1	0	1	1	1	0	195	11	12.915491	23.478285	0	6	0	0	0	5	5	0	0	0	0	0	0	7	47	422	14	77	195	0	0	0	-99	0	0	0	0	0	0	0	0	4	-99	1	3	0
201501290098	2015	1	29	0	1	1	1	0	0	153	6	24.891115	67.143311	0	2	0	0	0	5	5	0	0	0	0	0	0	2	18	153	0	0	0	0	0	0	-99	0	1	0	0	0	0	0	1	3	-99	0	-99	-99
201501290099	2015	1	29	0	1	1	1	0	0	60	10	30.329237	31.216847	0	7	0	0	0	8	18	0	0	0	0	0	0	16	90	60	0	0	0	0	0	0	-99	0	0	0	0	0	0	0	1	3	-99	0	-99	-99
201501290100	2015	1	29	0	1	1	1	0	0	60	10	30.666689	34.368584	0	3	0	0	0	6	8	0	0	0	0	0	0	14	67	60	0	0	0	0	0	0	-99	0	1	0	0	3	0	0	0	4	-99	0	-99	-99
201501290101	2015	1	29	0	1	1	1	0	1	19	6	23.171652	89.212055	0	3	0	0	0	6	17	0	0	0	0	0	0	22	109	19	0	0	0	0	0	0	-99	0	0	0	0	0	0	0	1	3	-99	0	-99	-99
201501290102	2015	1	29	0	1	1	1	0	1	19	6	23.165487	89.208917	0	3	0	0	0	6	17	0	0	0	0	0	0	22	109	19	0	0	0	0	0	0	-99	0	0	0	0	0	0	0	1	3	-99	0	-99	-99
201501290103	2015	1	29	0	1	1	1	0	1	19	6	23.165488	89.208917	0	3	0	0	0	6	17	0	0	0	0	0	0	22	109	19	0	0	0	0	0	0	-99	0	0	0	0	0	0	0	1	3	-99	0	-99	-99
201501290104	2015	1	29	0	1	1	1	0	1	19	6	23.165488	89.208917	0	3	0	0	0	6	17	0	0	0	0	0	0	22	109	19	0	0	0	0	0	0	-99	0	0	0	0	0	0	0	1	3	-99	0	-99	-99
201501300013	2015	1	30	0	1	1	1	0	0	153	6	29.913212	66.495602	0	3	0	0	1	6	15	6	13	0	0	0	0	20	0	153	0	0	0	0	0	0	1	1	0	0	0	0	0	0	0	4	-99	0	-99	-99
201501300021	2015	1	30	0	1	1	0	1	0	113	10	32.069286	20.151144	0	9	0	0	0	13	0	0	0	0	0	0	0	4	34	113	0	0	0	0	0	0	-99	0	1	0	0	0	0	0	0	4	-99	0	-99	-99
201501300033	2015	1	29	0	1	1	1	0	0	4	6	31.90406	65.890564	0	1	0	0	1	6	13	0	0	0	0	0	0	3	25	4	0	0	0	0	0	0	1	0	1	0	1	0	0	0	0	4	-99	0	-99	-99
201501300036	2015	1	30	0	1	1	0	1	0	4	6	34.346722	62.197315	0	2	0	0	0	5	2	0	0	0	0	0	0	4	34	4	0	0	0	0	0	0	-99	0	1	0	0	0	0	0	0	4	-99	0	-99	-99
201501300048	2015	1	30	0	1	1	1	0	0	160	5	6.441898	121.963071	0	3	0	0	0	6	17	0	0	0	0	0	0	14	68	160	0	0	0	0	0	0	-99	0	1	0	0	1	0	0	0	4	-99	0	-99	-99
201501300049	2015	1	30	0	1	1	1	0	0	95	10	35.45211	44.375465	0	3	0	0	1	6	15	6	13	0	0	0	0	3	22	95	0	0	0	0	0	0	2	0	2	0	2	0	0	0	-9	4	-99	0	-99	-99
201501300051	2015	1	30	0	1	1	1	0	0	95	10	32.468191	44.550194	0	3	0	0	0	6	15	0	0	0	0	0	0	20	0	95	0	0	0	0	0	0	2	1	1	0	1	0	0	0	0	4	-99	0	-99	-99
201501300053	2015	1	30	0	1	1	1	0	1	95	10	33.303566	44.371773	0	3	0	0	0	6	16	0	0	0	0	0	0	14	74	95	0	0	0	0	0	0	-99	0	9	0	0	15	0	0	1	3	-99	0	-99	-99
201501300054	2015	1	30	0	1	1	1	0	0	95	10	33.303566	44.371773	0	3	0	0	0	6	16	0	0	0	0	0	0	14	67	95	0	0	0	0	0	0	-99	0	1	0	0	7	0	0	0	4	-99	0	-99	-99
201501300055	2015	1	30	0	1	1	1	0	0	95	10	33.100529	44.584492	0	3	0	0	0	6	16	0	0	0	0	0	0	15	86	95	0	0	0	0	0	0	-99	0	2	0	0	6	0	0	-9	4	-99	0	-99	-99
201501300056	2015	1	30	0	1	1	1	0	0	95	10	33.303566	44.371773	0	3	0	0	0	6	11	0	0	0	0	0	0	14	75	95	0	0	0	0	0	0	-99	0	0	0	0	5	0	0	0	4	-99	0	-99	-99
201501300058	2015	1	30	0	1	1	1	0	0	95	10	33.303566	44.371773	0	3	0	0	0	6	11	0	0	0	0	0	0	14	76	95	0	0	0	0	0	0	-99	0	4	0	0	7	0	0	1	3	-99	0	-99	-99
201501300066	2015	1	30	0	1	1	1	0	1	95	10	33.303566	44.371773	0	3	0	0	1	6	15	0	0	0	0	0	0	14	74	95	0	0	0	0	0	0	-99	0	10	0	1	15	0	0	1	3	-99	0	-99	-99
201501300068	2015	1	30	0	1	1	0	1	0	95	10	34.271034	45.163567	0	3	0	0	1	6	13	0	0	0	0	0	0	4	36	95	0	0	0	0	0	0	-99	0	8	0	1	0	0	0	0	4	-99	0	-99	-99
201501300071	2015	1	30	0	1	1	1	0	0	60	10	31.13012	29.77837	0	3	0	0	0	6	17	0	0	0	0	0	0	11	60	60	0	0	0	0	0	0	-99	0	0	0	0	2	0	0	1	3	-99	0	-99	-99
201501300072	2015	1	30	0	1	1	1	0	0	173	10	25.403051	49.589794	0	2	0	0	0	5	5	0	0	0	0	0	0	1	4	217	0	0	0	0	0	0	-99	0	0	0	0	1	0	0	1	3	-99	0	-99	-99
201501300073	2015	1	30	0	1	1	1	0	0	60	10	31.238398	29.967003	0	3	0	0	0	6	16	0	0	0	0	0	0	19	100	60	0	0	0	0	0	0	-99	0	0	0	0	0	0	0	0	4	-99	0	-99	-99
201501300076	2015	1	30	0	1	0	1	1	0	603	8	54.607712	-5.95621	0	2	0	0	0	5	5	0	0	0	0	0	0	14	67	233	0	0	0	0	0	0	-99	0	0	0	0	1	0	0	0	4	-99	0	-99	-99
201501300077	2015	1	30	0	1	1	1	1	0	113	10	32.867867	13.189067	0	3	0	0	0	6	16	0	0	0	0	0	0	6	44	113	0	0	0	0	0	0	-99	0	0	0	0	0	0	0	1	4	-99	0	-99	-99
201501300082	2015	1	30	0	1	1	1	0	0	19	6	23.791275	90.418205	0	3	0	0	0	6	17	0	0	0	0	0	0	8	49	19	0	0	0	0	0	0	-99	0	0	0	0	0	0	0	-9	4	-99	0	-99	-99
201501300083	2015	1	31	0	1	1	1	0	0	19	6	23.791275	90.418205	0	3	0	0	0	6	17	0	0	0	0	0	0	8	49	19	10	55	19	0	0	0	2	2	0	0	0	3	0	1	-9	4	-99	0	-99	-99
201501300084	2015	1	30	0	1	1	1	0	0	19	6	23.791275	90.418205	0	2	0	0	0	8	19	0	0	0	0	0	0	3	22	19	0	0	0	0	0	0	-99	0	0	0	0	1	0	0	-9	4	-99	0	-99	-99
201501300085	2015	1	30	0	1	1	1	0	0	153	6	29.104943	71.276088	0	3	0	0	0	6	17	0	0	0	0	0	0	20	0	153	0	0	0	0	0	0	-99	0	0	0	0	0	0	0	0	4	-99	0	-99	-99
201501300089	2015	1	30	0	1	1	1	0	0	110	10	34.396312	35.89583	0	3	0	0	0	6	16	0	0	0	0	0	0	20	0	110	0	0	0	0	0	0	-99	0	0	0	0	0	0	0	0	4	-99	0	-99	-99
201501300094	2015	1	30	0	1	1	1	0	0	92	6	24.798346	93.94043	0	1	0	0	0	5	3	0	0	0	0	0	0	2	15	92	0	0	0	0	0	0	1	0	0	0	0	1	0	0	1	3	-99	0	-99	-99
201501300098	2015	1	30	0	1	1	1	0	0	160	5	14.599352	120.984772	0	3	0	0	0	6	7	0	0	0	0	0	0	20	0	160	0	0	0	0	0	0	-99	0	0	0	0	0	0	0	-9	4	-99	0	-99	-99
201501300099	2015	1	30	0	1	1	1	0	0	160	5	7.18109	124.21273	0	3	0	0	0	6	11	0	0	0	0	0	0	14	73	160	0	0	0	0	0	0	-99	0	0	0	0	0	0	0	-9	4	-99	0	-99	-99
201501300100	2015	1	30	0	1	1	1	0	0	160	5	6.955154	124.446599	0	3	0	0	0	6	7	0	0	0	0	0	0	20	0	160	0	0	0	0	0	0	-99	0	0	0	0	0	0	0	0	4	-99	0	-99	-99
201501300106	2015	1	30	0	1	1	1	0	0	195	11	11.270499	25.151484	1	2	0	0	0	5	5	0	0	0	0	0	0	14	70	195	0	0	0	0	0	0	-99	0	1	0	0	5	0	0	0	4	-99	0	-99	-99
201501310007	2015	1	31	0	1	1	0	1	0	228	10	13.985013	45.558479	0	3	0	0	0	6	16	0	0	0	0	0	0	4	29	228	0	0	0	0	0	0	-99	0	0	0	0	2	0	0	1	4	-99	0	-99	-99
201501310010	2015	2	1	0	1	1	1	0	0	160	5	14.29937	120.957359	0	2	0	0	0	5	5	0	0	0	0	0	0	2	21	160	0	0	0	0	0	0	-99	0	3	0	0	1	0	0	0	4	-99	0	-99	-99
201501310015	2015	1	31	0	1	1	1	0	0	4	6	35.480785	71.323781	0	3	0	0	0	6	8	0	0	0	0	0	0	3	23	4	0	0	0	0	0	0	-99	0	4	0	0	0	0	0	1	3	-99	0	-99	-99
201501310017	2015	1	31	0	1	1	1	0	0	60	10	31.126646	33.800865	0	2	0	0	0	5	5	0	0	0	0	0	0	2	18	60	0	0	0	0	0	0	3	0	1	0	0	0	0	0	0	4	-99	0	-99	-99
201501310019	2015	1	31	0	1	1	0	1	0	60	10	31.212225	34.117065	0	2	0	0	0	5	5	10	0	0	0	0	0	4	36	60	0	0	0	0	0	0	1	0	1	0	1	0	0	0	1	4	-99	0	-99	-99
201501310020	2015	1	31	0	1	1	0	1	0	60	10	30.608472	33.617577	0	9	0	0	0	13	0	0	0	0	0	0	0	4	36	60	0	0	0	0	0	0	-99	0	0	0	0	0	0	0	0	4	-99	0	-99	-99
201501310022	2015	1	31	0	1	1	1	0	0	95	10	33.303566	44.371773	0	3	0	0	0	6	15	0	0	0	0	0	0	14	73	95	0	0	0	0	0	0	-99	0	1	0	0	5	0	0	1	3	-99	0	-99	-99
201501310023	2015	1	31	0	1	1	0	1	0	95	10	33.303566	44.371773	0	3	0	0	0	6	16	0	0	0	0	0	0	4	29	95	0	0	0	0	0	0	-99	0	1	0	0	3	0	0	0	4	-99	0	-99	-99
201501310024	2015	1	31	0	1	1	0	1	0	95	10	35.451722	44.097407	0	3	0	0	0	6	17	0	0	0	0	0	0	4	34	95	0	0	0	0	0	0	-99	0	1	0	0	3	0	0	1	3	-99	0	-99	-99
201501310025	2015	1	31	0	1	1	1	0	0	95	10	33.303566	44.371773	0	3	0	0	0	6	16	0	0	0	0	0	0	1	2	95	0	0	0	0	0	0	-99	0	2	0	0	9	0	0	-9	4	-99	0	-99	-99
201501310029	2015	1	31	0	1	1	1	0	0	95	10	33.349159	43.784199	0	3	0	0	0	6	11	0	0	0	0	0	0	14	75	95	0	0	0	0	0	0	-99	0	5	0	0	44	0	0	1	3	-99	0	-99	-99
201501310031	2015	1	31	0	1	1	1	0	0	95	10	33.303566	44.371773	0	3	0	0	0	6	16	0	0	0	0	0	0	1	7	95	0	0	0	0	0	0	-99	0	1	0	0	8	0	0	-9	4	-99	0	-99	-99
201501310032	2015	1	31	1	1	1	1	0	0	95	10	33.303566	44.371773	0	6	0	0	0	5	5	0	0	0	0	0	0	17	94	95	0	0	0	0	0	0	-99	0	0	0	0	0	0	0	0	4	-99	1	1	0
201501310036	2015	1	31	0	1	1	1	0	0	95	10	33.100529	44.584492	0	3	0	0	0	6	16	0	0	0	0	0	0	14	74	95	0	0	0	0	0	0	-99	0	4	0	0	11	0	0	-9	4	-99	0	-99	-99
201501310037	2015	1	31	0	1	1	0	1	0	95	10	33.540672	44.251266	0	3	0	0	0	6	16	0	0	0	0	0	0	4	29	95	0	0	0	0	0	0	-99	0	2	0	0	4	0	0	0	4	-99	0	-99	-99
201501310038	2015	1	31	0	1	1	1	0	0	95	10	33.303566	44.371773	0	3	0	0	0	6	29	0	0	0	0	0	0	14	73	95	0	0	0	0	0	0	-99	0	3	0	0	6	0	0	1	3	-99	0	-99	-99
201501310044	2015	1	31	0	1	1	1	0	0	19	6	23.791275	90.418205	0	3	0	0	0	6	17	0	0	0	0	0	0	2	17	19	0	0	0	0	0	0	-99	0	0	0	0	0	0	0	-9	4	-99	0	-99	-99
201501310046	2015	1	31	0	1	1	1	0	0	19	6	24.448424	89.705561	0	3	0	0	0	6	17	0	0	0	0	0	0	2	21	19	0	0	0	0	0	0	-99	0	0	0	0	0	0	0	-9	4	-99	0	-99	-99
201501310102	2015	1	31	0	1	1	1	0	0	229	11	2.866667	30.85	0	2	0	0	0	5	5	0	0	0	0	0	0	1	11	229	7	47	422	3	25	229	15	0	16	0	0	0	0	0	1	3	-99	0	-99	-99
201501310103	2015	1	31	0	1	1	0	1	0	195	11	13.647672	24.096333	0	2	0	0	0	5	5	0	0	0	0	0	0	4	27	195	0	0	0	0	0	0	-99	0	0	0	0	0	0	0	1	4	-99	0	-99	-99
201501310104	2015	1	31	0	1	1	1	0	0	60	10	31.126646	33.800865	0	3	0	0	0	6	16	0	0	0	0	0	0	4	29	60	0	0	0	0	0	0	-99	0	0	0	0	0	0	0	0	4	-99	0	-99	-99
201502010007	2015	2	1	0	1	1	1	0	0	19	6	23.791275	90.418205	0	3	0	0	0	6	17	0	0	0	0	0	0	2	21	19	0	0	0	0	0	0	-99	0	0	0	0	0	0	0	1	3	-99	0	-99	-99
201502010015	2015	2	1	0	1	1	0	1	0	95	10	33.247181	44.025452	0	3	0	0	0	6	16	0	0	0	0	0	0	4	29	95	0	0	0	0	0	0	-99	0	1	0	0	5	0	0	0	4	-99	0	-99	-99
201502010016	2015	2	1	0	1	1	1	0	0	95	10	33.509014	44.202484	0	3	0	0	0	6	16	0	0	0	0	0	0	17	94	95	0	0	0	0	0	0	-99	0	1	0	0	11	0	0	-9	4	-99	0	-99	-99
201502010019	2015	2	1	0	1	1	1	0	0	95	10	33.303566	44.371773	0	3	0	0	0	6	16	0	0	0	0	0	0	1	7	95	0	0	0	0	0	0	-99	0	1	0	0	8	0	0	-9	4	-99	0	-99	-99
201502010020	2015	2	1	0	1	1	1	0	0	95	10	33.303566	44.371773	0	3	0	0	0	6	16	0	0	0	0	0	0	1	2	95	0	0	0	0	0	0	-99	0	0	0	0	10	0	0	-9	4	-99	0	-99	-99
201502010026	2015	2	1	0	1	1	1	0	0	95	10	34.208416	43.890713	0	3	0	0	0	6	16	0	0	0	0	0	0	20	0	95	0	0	0	0	0	0	-99	0	0	0	0	0	0	0	0	4	-99	0	-99	-99
201502010031	2015	2	1	0	1	1	1	0	0	92	6	33.8912	74.892711	1	3	0	0	0	6	16	0	0	0	0	0	0	20	0	92	0	0	0	0	0	0	-99	0	0	0	0	0	0	0	0	4	-99	0	-99	-99
201502010045	2015	2	1	0	1	1	1	0	0	205	5	13.785793	100.560852	0	3	0	0	0	6	17	0	0	0	0	0	0	1	7	205	0	0	0	0	0	0	-99	0	0	0	0	1	0	0	1	4	-99	0	-99	-99
201502010091	2015	2	1	0	1	1	1	0	0	19	6	23.791275	90.418205	0	3	0	0	0	6	16	0	0	0	0	0	0	14	68	19	0	0	0	0	0	0	-99	0	0	0	0	1	0	0	-9	4	-99	0	-99	-99
201502010092	2015	2	1	0	1	1	1	0	0	19	6	23.791275	90.418205	0	3	0	0	0	6	16	0	0	0	0	0	0	14	68	19	0	0	0	0	0	0	-99	0	0	0	0	1	0	0	-9	4	-99	0	-99	-99
201502010101	2015	2	1	0	1	1	1	0	0	60	10	31.250196	34.24128	0	3	0	0	0	6	11	0	0	0	0	0	0	14	76	60	0	0	0	0	0	0	-99	0	1	0	0	1	0	0	1	3	-99	0	-99	-99
201502010114	2015	2	1	0	1	1	1	0	0	60	10	31.200016	29.918828	0	3	0	0	0	6	16	0	0	0	0	0	0	2	21	60	0	0	0	0	0	0	-99	0	0	0	0	0	0	0	0	4	-99	0	-99	-99
201502010116	2015	2	1	1	1	1	1	0	0	153	6	25.26786	63.460991	0	6	0	0	0	13	0	0	0	0	0	0	0	1	12	153	0	0	0	0	0	0	-99	0	0	0	0	0	0	0	0	4	-99	1	2	0
201502010123	2015	3	1	0	1	1	1	0	0	95	10	33.19392	44.408577	0	3	0	0	0	6	16	0	0	0	0	0	0	17	94	95	0	0	0	0	0	0	-99	0	3	0	0	6	0	0	0	4	-99	0	-99	-99
201502010124	2015	2	1	0	1	1	1	0	0	153	6	24.891115	67.143311	0	2	0	0	0	5	5	0	0	0	0	0	0	15	87	153	0	0	0	0	0	0	2	0	2	0	0	0	0	0	1	3	-99	0	-99	-99
201502010125	2015	2	1	0	1	1	1	0	0	153	6	24.891115	67.143311	0	2	0	0	0	5	5	0	0	0	0	0	0	1	7	153	0	0	0	0	0	0	2	0	1	0	0	1	0	0	-9	4	-99	0	-99	-99
201502010128	2015	2	1	1	1	1	1	0	0	92	6	25.535488	89.862199	0	6	0	0	0	5	5	0	0	0	0	0	0	8	48	92	0	0	0	0	0	0	-99	0	0	0	0	0	0	0	0	4	-99	1	1	0
201502010134	2015	2	1	0	1	1	1	1	0	92	6	32.553454	75.113443	0	3	0	0	0	6	7	0	0	0	0	0	0	20	0	92	0	0	0	0	0	0	-99	0	0	0	0	0	0	0	0	4	-99	0	-99	-99
201502010135	2015	2	1	0	1	1	1	0	0	111	11	-29.311119	27.483231	0	2	0	0	0	5	5	0	0	0	0	0	0	4	34	111	1	13	111	0	0	0	-99	0	1	0	0	2	0	0	0	4	-99	0	-99	-99
201502020001	2015	2	2	0	1	1	0	1	0	205	5	6.804284	101.502075	0	3	0	0	0	6	17	0	0	0	0	0	0	4	29	205	0	0	0	0	0	0	-99	0	0	0	0	0	0	0	0	4	-99	0	-99	-99
201502020002	2015	2	2	0	1	1	1	0	0	95	10	33.303566	44.371773	0	3	0	0	0	6	16	0	0	0	0	0	0	1	7	95	0	0	0	0	0	0	-99	0	2	0	0	5	0	0	-9	4	-99	0	-99	-99
201502020003	2015	2	2	0	1	1	1	0	0	95	10	33.303566	44.371773	0	3	0	0	0	6	16	0	0	0	0	0	0	1	2	95	0	0	0	0	0	0	-99	0	1	0	0	11	0	0	-9	4	-99	0	-99	-99
201502020007	2015	2	2	0	1	1	1	0	0	153	6	28.518663	68.542679	1	3	0	0	0	6	16	0	0	0	0	0	0	21	106	153	0	0	0	0	0	0	-99	0	0	0	0	0	0	0	1	4	-99	0	-99	-99
201502020012	2015	2	2	0	1	1	0	1	0	60	10	31.126646	33.800865	0	2	0	0	0	5	5	0	0	0	0	0	0	4	34	60	0	0	0	0	0	0	-99	0	0	0	0	1	0	0	0	4	-99	0	-99	-99
201502020013	2015	2	2	0	1	1	1	0	0	60	10	30.329237	31.216847	0	3	0	0	0	6	16	0	0	0	0	0	0	20	0	60	0	0	0	0	0	0	-99	0	0	0	0	0	0	0	0	4	-99	0	-99	-99
201502020020	2015	2	2	0	1	1	1	0	0	113	10	32.867867	13.189067	0	3	0	0	0	6	15	0	0	0	0	0	0	3	22	113	0	0	0	0	0	0	-99	0	1	0	0	2	0	0	1	3	-99	0	-99	-99
201502020037	2015	2	2	0	1	1	1	0	0	153	6	25.1458	62.326557	0	2	0	0	0	5	5	0	0	0	0	0	0	21	107	153	0	0	0	0	0	0	-99	0	1	0	0	0	0	0	-9	4	-99	0	-99	-99
201502020039	2015	2	2	1	1	1	1	0	0	113	10	32.646988	14.260969	0	6	0	0	0	5	5	0	0	0	0	0	0	2	15	113	0	0	0	0	0	0	-99	0	0	0	0	0	0	0	0	4	-99	1	1	0
201502020041	2015	2	2	0	1	1	1	0	0	95	10	33.303566	44.371773	0	3	0	0	0	6	16	0	0	0	0	0	0	14	74	95	0	0	0	0	0	0	-99	0	1	0	0	6	0	0	-9	4	-99	0	-99	-99
201502020048	2015	2	2	0	1	1	0	1	0	4	6	35.229757	71.529583	0	3	0	0	0	6	8	0	0	0	0	0	0	4	35	4	0	0	0	0	0	0	-99	0	1	0	0	1	0	0	1	4	-99	0	-99	-99
201502020052	2015	2	2	0	1	1	1	0	0	92	6	22.422798	85.498517	0	3	0	0	0	6	17	0	0	0	0	0	0	4	34	92	0	0	0	0	0	0	-99	0	0	0	0	0	0	0	0	4	-99	0	-99	-99
201502020053	2015	2	2	0	1	1	1	0	1	147	11	4.83996	7.050104	0	3	0	0	0	6	28	0	0	0	0	0	0	2	14	147	0	0	0	0	0	0	-99	0	0	0	0	0	0	0	1	3	-99	0	-99	-99
201502020054	2015	2	2	0	1	1	1	0	1	147	11	5.056759	6.923597	0	3	0	0	0	6	28	0	0	0	0	0	0	2	14	147	0	0	0	0	0	0	-99	0	0	0	0	0	0	0	1	3	-99	0	-99	-99
201502020055	2015	2	2	0	1	1	1	0	1	147	11	4.756612	6.766478	0	3	0	0	0	6	28	0	0	0	0	0	0	2	14	147	0	0	0	0	0	0	-99	0	0	0	0	0	0	0	1	3	-99	0	-99	-99
201502020056	2015	2	2	0	1	1	1	0	0	147	11	4.532813	6.403743	0	2	0	0	0	5	5	0	0	0	0	0	0	3	23	147	1	12	147	0	0	0	-99	0	3	0	2	0	0	0	0	4	-99	0	-99	-99
201502020060	2015	2	2	0	1	1	1	0	0	209	10	39.930771	32.76754	0	3	0	0	0	6	17	0	0	0	0	0	0	14	79	209	0	0	0	0	0	0	-99	0	0	0	0	0	0	0	0	4	-99	0	-99	-99
201502020087	2015	2	2	0	1	1	1	0	0	123	11	15.01227	-10.940982	0	9	0	0	0	13	0	0	0	0	0	0	0	3	22	123	0	0	0	0	0	0	-99	0	0	0	0	0	0	0	0	4	-99	0	-99	-99
201502020089	2015	2	2	0	1	1	1	0	0	95	10	33.303566	44.371773	0	1	0	0	0	6	15	0	0	0	0	0	0	4	34	95	0	0	0	0	0	0	-99	0	1	0	0	2	0	0	1	3	-99	0	-99	-99
201502020093	2015	2	2	0	1	1	1	0	0	213	11	0.145259	33.784389	0	1	0	0	0	5	5	0	0	0	0	0	0	2	15	213	0	0	0	0	0	0	-99	0	1	0	0	0	0	0	0	4	-99	0	-99	-99
201502020099	2015	2	2	0	1	1	1	0	0	19	6	23.791275	90.418205	0	3	0	0	0	6	17	0	0	0	0	0	0	19	105	19	0	0	0	0	0	0	-99	0	0	0	0	2	0	0	1	3	-99	0	-99	-99
201502020101	2015	2	2	0	1	1	1	0	0	19	6	22.341896	91.815117	0	3	0	0	0	6	17	0	0	0	0	0	0	19	99	19	0	0	0	0	0	0	-99	0	0	0	0	0	0	0	1	3	-99	0	-99	-99
201502030003	2015	2	3	0	1	1	0	1	0	95	10	34.192039	42.497272	0	3	0	0	1	6	15	0	0	0	0	0	0	4	36	95	0	0	0	0	0	0	-99	0	2	0	1	3	0	0	0	4	-99	0	-99	-99
201502030004	2015	2	3	0	1	1	1	0	0	95	10	33.303566	44.371773	0	3	0	0	0	6	15	0	0	0	0	0	0	14	74	95	0	0	0	0	0	0	-99	0	3	0	0	10	0	0	-9	4	-99	0	-99	-99
201502030005	2015	2	3	0	1	1	1	0	0	95	10	33.303566	44.371773	0	3	0	0	0	6	16	0	0	0	0	0	0	1	7	95	0	0	0	0	0	0	-99	0	1	0	0	6	0	0	-9	4	-99	0	-99	-99
201502030006	2015	2	3	0	1	1	1	0	0	95	10	33.247181	44.025452	0	3	0	0	0	6	15	0	0	0	0	0	0	17	94	95	0	0	0	0	0	0	-99	0	2	0	0	6	0	0	1	3	-99	0	-99	-99
201502030007	2015	2	3	0	1	1	1	0	0	95	10	33.303566	44.371773	0	3	0	0	0	6	16	0	0	0	0	0	0	1	7	95	0	0	0	0	0	0	-99	0	2	0	0	6	0	0	-9	4	-99	0	-99	-99
201502030008	2015	2	3	0	1	1	1	0	0	60	10	31.200016	29.918828	0	3	0	0	0	6	12	0	0	0	0	0	0	3	23	60	1	6	60	0	0	0	-99	0	1	0	0	3	0	0	-9	4	-99	0	-99	-99
201502030010	2015	2	3	0	1	1	1	0	0	60	10	30.084629	31.334314	0	3	0	0	0	6	17	0	0	0	0	0	0	21	107	60	0	0	0	0	0	0	-99	0	0	0	0	4	0	0	1	3	-99	0	-99	-99
201502030011	2015	2	3	0	1	1	1	0	0	153	6	29.855375	67.339928	0	8	7	0	0	8	18	9	22	0	0	0	0	15	87	153	0	0	0	0	0	0	-99	0	0	0	0	1	0	0	1	3	-99	0	-99	-99
201502030018	2015	2	3	0	1	1	1	0	0	153	6	25.1736	62.318382	0	1	0	0	0	5	5	0	0	0	0	0	0	2	15	153	0	0	0	0	0	0	-99	0	1	0	0	0	0	0	1	3	-99	0	-99	-99
201502030022	2015	2	3	0	1	1	1	0	0	153	6	24.891115	67.143311	0	3	0	0	0	6	17	0	0	0	0	0	0	4	29	153	14	67	153	0	0	0	-99	0	0	0	0	2	0	0	1	4	-99	0	-99	-99
201502030028	2015	2	3	0	1	1	1	0	0	113	10	32.867867	13.189067	0	3	0	0	0	6	17	0	0	0	0	0	0	7	46	195	0	0	0	0	0	0	-99	0	0	0	0	0	0	0	0	4	-99	0	-99	-99
201502030032	2015	2	3	0	1	1	0	1	0	60	10	31.250196	34.24128	0	3	0	0	0	6	16	0	0	0	0	0	0	4	35	60	0	0	0	0	0	0	-99	0	0	0	0	0	0	0	-9	4	-99	0	-99	-99
201502030033	2015	2	3	0	1	1	1	0	0	60	10	31.13194	33.803232	0	3	0	0	0	6	16	0	0	0	0	0	0	20	0	60	0	0	0	0	0	0	-99	0	0	0	0	0	0	0	0	4	-99	0	-99	-99
201502030034	2015	2	3	0	1	1	1	0	0	60	10	31.200016	29.918828	0	3	0	0	0	6	16	0	0	0	0	0	0	1	1	60	0	0	0	0	0	0	-99	0	0	0	0	0	0	0	-9	4	-99	0	-99	-99
201502030037	2015	2	1	0	1	1	1	0	0	60	10	31.126646	33.800865	0	3	0	0	0	6	16	0	0	0	0	0	0	21	106	60	0	0	0	0	0	0	-99	0	0	0	0	0	0	0	1	4	-99	0	-99	-99
201502030039	2015	2	3	0	1	1	1	0	0	60	10	30.084629	31.334314	0	3	0	0	0	6	16	0	0	0	0	0	0	2	21	60	0	0	0	0	0	0	-99	0	0	0	0	0	0	0	-9	4	-99	0	-99	-99
201502030040	2015	2	3	0	1	1	1	0	0	182	11	4.73538	45.2024	0	3	0	0	0	6	12	0	0	0	0	0	0	19	101	182	0	0	0	0	0	0	-99	0	0	0	0	0	0	0	1	3	-99	0	-99	-99
201502030044	2015	2	3	0	1	1	1	0	0	4	6	34.346722	62.197315	1	2	0	0	0	5	4	0	0	0	0	0	0	3	24	4	0	0	0	0	0	0	5	0	1	0	0	2	0	0	0	4	-99	0	-99	-99
201502030046	2015	2	3	0	1	1	1	0	0	228	10	12.825647	44.846416	0	3	2	0	0	6	16	5	5	0	0	0	0	2	21	228	0	0	0	0	0	0	-99	0	0	0	0	3	0	0	1	3	-99	0	-99	-99
201502030047	2015	2	3	0	1	1	1	0	0	228	10	15.666667	43.95	0	3	0	0	0	6	16	0	0	0	0	0	0	14	67	228	0	0	0	0	0	0	-99	0	0	0	0	5	0	0	-9	4	-99	0	-99	-99
201502030048	2015	2	3	0	1	1	1	0	0	228	10	180	180	0	3	0	0	0	6	16	0	0	0	0	0	0	21	108	228	0	0	0	0	0	0	-99	0	0	0	0	0	0	0	1	4	-99	0	-99	-99
201502030050	2015	2	3	0	1	1	1	0	0	95	10	33.906048	44.724545	0	2	0	0	0	5	5	0	0	0	0	0	0	17	94	95	0	0	0	0	0	0	-99	0	2	0	0	0	0	0	0	4	-99	0	-99	-99
201502030051	2015	2	3	0	1	1	1	0	0	95	10	34.881348	44.62513	0	2	0	0	0	5	5	0	0	0	0	0	0	3	25	95	0	0	0	0	0	0	-99	0	0	0	0	1	0	0	0	4	-99	0	-99	-99
201502030083	2015	2	3	0	1	1	1	0	0	19	6	23.616667	90.5	0	3	0	0	0	6	17	0	0	0	0	0	0	2	21	19	0	0	0	0	0	0	-99	0	0	0	0	0	0	0	0	4	-99	0	-99	-99
201502030086	2015	2	3	1	1	1	1	0	0	153	6	27.560076	68.215714	0	6	0	0	0	13	0	0	0	0	0	0	0	22	109	153	0	0	0	0	0	0	-99	0	0	0	0	0	0	0	0	4	-99	1	1	0
201502030087	2015	2	3	0	1	1	1	0	0	153	6	33.594013	73.069077	0	1	0	0	0	5	5	0	0	0	0	0	0	1	6	153	0	0	0	0	0	0	2	0	1	0	0	0	0	0	0	4	-99	0	-99	-99
201502030096	2015	2	3	0	1	1	1	0	0	153	6	32.800575	70.49556	0	1	0	0	0	6	12	0	0	0	0	0	0	22	109	153	0	0	0	0	0	0	-99	0	0	0	0	0	0	0	1	3	-99	0	-99	-99
201502030100	2015	2	3	0	1	1	1	0	0	95	10	33.303566	44.371773	0	3	0	0	0	6	16	0	0	0	0	0	0	14	67	95	0	0	0	0	0	0	-99	0	3	0	0	10	0	0	0	4	-99	0	-99	-99
201502030102	2015	2	3	0	1	1	1	0	0	182	11	6.774396	47.429031	0	1	0	0	0	6	16	0	0	0	0	0	0	2	18	182	0	0	0	0	0	0	-99	0	0	0	0	0	0	0	1	3	-99	0	-99	-99
201502030104	2015	2	3	0	1	1	1	0	0	19	6	23.791275	90.418205	1	3	0	0	0	6	17	0	0	0	0	0	0	20	0	19	0	0	0	0	0	0	1	1	0	0	0	1	0	1	-9	4	-99	0	-99	-99
201502040002	2015	2	4	0	1	1	0	1	0	95	10	34.326581	45.054344	1	3	0	0	0	6	16	0	0	0	0	0	0	4	29	95	0	0	0	0	0	0	-99	0	0	0	0	3	0	0	0	4	-99	0	-99	-99
201502040004	2015	2	3	0	1	1	1	0	0	153	6	33.590603	71.44062	0	2	0	0	0	5	5	0	0	0	0	0	0	2	18	153	0	0	0	0	0	0	-99	0	5	0	0	2	0	0	-9	4	-99	0	-99	-99
201502040005	2015	2	4	0	1	1	1	0	0	153	6	30.200819	66.994354	0	2	0	0	0	5	5	0	0	0	0	0	0	3	25	153	0	0	0	0	0	0	2	0	1	0	0	0	0	0	0	4	-99	0	-99	-99
201502040006	2015	2	4	0	1	1	1	0	0	153	6	32.960724	70.604577	0	3	0	0	0	6	16	0	0	0	0	0	0	8	49	153	0	0	0	0	0	0	-99	0	0	0	0	0	0	0	0	4	-99	0	-99	-99
201502040012	2015	2	4	0	1	1	1	0	0	113	10	32.867867	13.189067	0	7	0	0	0	8	18	0	0	0	0	0	0	3	25	113	0	0	0	0	0	0	-99	0	0	0	0	0	0	0	1	3	-99	0	-99	-99
201502040020	2015	2	4	0	1	1	1	0	1	4	6	36.196546	65.346325	0	2	0	0	0	5	5	0	0	0	0	0	0	3	22	4	0	0	0	0	0	0	-99	0	2	0	1	3	0	2	-9	4	-99	0	-99	-99
201502040023	2015	2	3	1	1	1	1	0	0	4	6	36.196865	65.349378	0	6	0	0	0	5	5	0	0	0	0	0	0	1	12	4	0	0	0	0	0	0	-99	0	0	0	0	0	0	0	1	3	-99	1	4	0
201502040024	2015	2	4	0	1	1	1	0	1	4	6	36.198591	65.349432	0	2	0	0	0	5	5	0	0	0	0	0	0	3	22	4	0	0	0	0	0	0	-99	0	1	0	1	3	0	2	-9	4	-99	0	-99	-99
201502040029	2015	2	4	0	1	1	0	1	0	228	10	13.063399	44.880882	0	3	0	0	0	6	11	0	0	0	0	0	0	4	27	228	0	0	0	0	0	0	-99	0	0	0	0	0	0	0	-9	4	-99	0	-99	-99
201502040030	2015	2	4	0	1	1	1	0	0	228	10	13.05	44.883333	0	1	0	0	0	5	5	0	0	0	0	0	0	1	0	228	0	0	0	0	0	0	2	0	1	0	0	0	0	0	-9	4	-99	0	-99	-99
201502040034	2015	2	4	0	1	1	1	0	0	95	10	34.139278	42.378056	0	3	0	0	0	6	15	0	0	0	0	0	0	20	0	95	0	0	0	0	0	0	-99	0	0	0	0	0	0	0	1	4	-99	0	-99	-99
201502040036	2015	2	4	0	1	1	1	0	0	153	6	33.958225	71.416536	0	3	0	0	0	6	16	0	0	0	0	0	0	8	49	153	0	0	0	0	0	0	-99	0	0	0	0	0	0	0	1	3	-99	0	-99	-99
201502040038	2015	2	4	0	1	1	1	0	0	4	6	34.301389	62.246389	0	1	0	0	0	5	5	0	0	0	0	0	0	14	77	4	0	0	0	0	0	0	2	0	3	0	0	0	0	0	1	3	-99	0	-99	-99
201502040039	2015	2	4	0	1	1	1	0	0	153	6	31.989982	70.358601	0	3	0	0	0	6	16	0	0	0	0	0	0	14	76	153	0	0	0	0	0	0	-99	0	0	0	0	0	0	0	1	3	-99	0	-99	-99
201502040050	2015	2	4	0	1	1	1	0	0	160	5	14.672042	120.957726	0	1	0	0	0	5	5	0	0	0	0	0	0	2	15	160	0	0	0	0	0	0	2	0	0	0	0	2	0	0	1	3	-99	0	-99	-99
201502040081	2015	2	4	0	1	1	1	0	0	19	6	24.710578	88.941387	0	3	0	0	0	6	17	0	0	0	0	0	0	1	7	19	0	0	0	0	0	0	-99	0	0	0	0	5	0	0	1	3	-99	0	-99	-99
201502040083	2015	2	4	0	1	1	1	0	0	160	5	9.573838	125.732754	0	3	0	0	0	6	17	0	0	0	0	0	0	19	99	160	0	0	0	0	0	0	-99	0	0	0	0	2	0	0	1	3	-99	0	-99	-99
201502040086	2015	2	4	0	1	1	1	0	0	19	6	23.159466	89.232419	1	3	0	0	0	6	17	0	0	0	0	0	0	3	22	19	0	0	0	0	0	0	-99	0	0	0	0	0	0	0	1	3	-99	0	-99	-99
201502040093	2015	2	4	0	1	1	0	1	0	123	11	16.771996	-3.007346	1	3	0	0	0	6	8	0	0	0	0	0	0	4	35	123	0	0	0	0	0	0	-99	0	0	0	0	0	0	0	1	4	-99	0	-99	-99
201502040094	2015	2	4	0	1	1	1	0	0	153	6	32.823055	70.783745	0	1	0	0	0	5	5	0	0	0	0	0	0	14	84	153	0	0	0	0	0	0	-99	0	1	0	0	0	0	0	0	4	-99	0	-99	-99
201502040100	2015	2	4	0	1	1	1	0	0	19	6	22.699901	90.36605	0	7	0	0	0	8	18	0	0	0	0	0	0	2	15	19	0	0	0	0	0	0	-99	0	0	0	0	0	0	0	0	4	-99	0	-99	-99
201502040101	2015	2	4	0	1	1	1	0	0	19	6	23.791275	90.418205	0	2	0	0	0	5	5	8	19	0	0	0	0	3	23	19	0	0	0	0	0	0	-99	0	2	0	2	0	0	0	0	4	-99	0	-99	-99
201502040102	2015	2	4	0	1	1	1	0	0	19	6	23.791275	90.418205	0	3	0	0	0	6	17	0	0	0	0	0	0	20	0	19	0	0	0	0	0	0	-99	0	0	0	0	0	0	0	-9	4	-99	0	-99	-99
201502040104	2015	2	4	0	1	1	1	0	0	603	8	54.687219	-5.965753	0	3	0	0	0	6	31	0	0	0	0	0	0	20	0	233	0	0	0	0	0	0	-99	0	0	0	0	0	0	0	0	4	-99	0	-99	-99
201502040105	2015	2	4	0	0	1	1	1	0	130	1	25.852107	-97.505632	0	6	0	0	0	5	5	9	21	0	0	0	0	10	53	130	0	0	0	0	0	0	3	0	0	0	0	1	0	0	0	4	-99	1	1	0
201502040106	2015	2	4	0	1	1	1	0	0	60	10	31.126646	33.800865	0	3	0	0	0	6	15	0	0	0	0	0	0	20	0	60	0	0	0	0	0	0	-99	0	0	0	0	0	0	0	0	4	-99	0	-99	-99
201502040107	2015	2	4	0	1	1	1	0	0	60	10	31.212225	34.117065	0	3	0	0	0	6	16	0	0	0	0	0	0	20	0	60	0	0	0	0	0	0	-99	0	0	0	0	0	0	0	0	4	-99	0	-99	-99
201502040108	2015	2	4	0	1	1	1	0	0	60	10	31.250196	34.24128	0	3	0	0	0	6	16	0	0	0	0	0	0	20	0	60	0	0	0	0	0	0	-99	0	0	0	0	0	0	0	0	4	-99	0	-99	-99
201502040109	2015	2	4	0	1	1	1	0	0	53	8	35.140467	33.037082	0	3	0	0	0	6	16	0	0	0	0	0	0	3	26	53	0	0	0	0	0	0	-99	0	0	0	0	0	0	0	1	3	-99	0	-99	-99
201502040110	2015	2	4	0	1	1	1	0	0	113	10	32.867867	13.189067	0	8	7	0	0	9	22	0	0	0	0	0	0	10	54	113	0	0	0	0	0	0	-99	0	0	0	0	0	0	0	1	3	-99	0	-99	-99
201502040111	2015	2	8	0	1	1	1	0	0	45	3	4.667128	-74.106056	0	3	0	0	0	6	16	0	0	0	0	0	0	20	0	45	0	0	0	0	0	0	-99	0	0	0	0	0	0	0	-9	4	-99	0	-99	-99
201502050001	2015	2	5	0	1	1	1	0	0	92	6	25.095386	94.361652	0	3	0	0	0	6	16	0	0	0	0	0	0	14	67	92	0	0	0	0	0	0	-99	0	1	0	0	1	0	0	1	3	-99	0	-99	-99
201502050002	2015	2	5	0	1	1	1	0	0	60	10	30.544004	31.135254	0	2	0	0	0	5	5	8	18	0	0	0	0	1	2	60	0	0	0	0	0	0	-99	0	1	0	0	0	0	0	1	3	-99	0	-99	-99
201502050003	2015	2	5	0	1	1	1	0	0	60	10	31.126646	33.800865	0	2	0	0	0	5	5	0	0	0	0	0	0	3	22	60	0	0	0	0	0	0	-99	0	1	0	0	1	0	0	0	4	-99	0	-99	-99
201502050004	2015	2	5	0	1	1	1	0	0	205	5	6.057088	101.695443	1	3	0	0	0	6	17	0	0	0	0	0	0	3	23	205	0	0	0	0	0	0	-99	0	0	0	0	0	0	0	1	3	-99	0	-99	-99
201502050007	2015	2	5	0	1	1	1	0	0	153	6	26.985407	64.055084	0	1	0	0	0	5	5	0	0	0	0	0	0	2	15	153	0	0	0	0	0	0	-99	0	0	0	0	0	0	0	1	3	-99	0	-99	-99
201502050009	2015	2	5	0	1	1	1	1	0	113	10	32.867867	13.189067	0	7	0	0	0	8	18	0	0	0	0	0	0	14	81	113	0	0	0	0	0	0	-99	0	0	0	0	0	0	0	1	3	-99	0	-99	-99
201502050011	2015	2	5	0	1	1	1	0	0	4	6	36.247525	64.874032	0	9	0	0	0	13	0	0	0	0	0	0	0	3	25	4	0	0	0	0	0	0	-99	0	0	0	0	2	0	0	0	4	-99	0	-99	-99
201502050023	2015	2	5	0	1	1	1	0	0	95	10	33.303566	44.371773	0	3	0	0	0	6	16	0	0	0	0	0	0	14	78	95	0	0	0	0	0	0	-99	0	1	0	0	6	0	0	-9	4	-99	0	-99	-99
201502050024	2015	2	5	0	1	1	1	0	0	95	10	33.303566	44.371773	0	3	0	0	0	6	16	0	0	0	0	0	0	1	2	95	0	0	0	0	0	0	-99	0	2	0	0	5	0	0	-9	4	-99	0	-99	-99
201502050038	2015	2	5	0	1	1	1	0	0	160	5	14.333568	120.957515	0	1	0	0	0	5	5	0	0	0	0	0	0	2	15	160	3	25	160	0	0	0	2	0	1	0	0	1	0	0	0	4	-99	0	-99	-99
201502050067	2015	2	5	0	1	1	1	0	0	92	6	22.973423	78.656894	0	2	0	0	0	5	5	0	0	0	0	0	0	2	19	92	0	0	0	0	0	0	-99	0	0	0	0	2	0	0	1	3	-99	0	-99	-99
201502050068	2015	2	5	0	1	1	1	0	0	92	6	22.973423	78.656894	0	2	0	0	0	5	5	0	0	0	0	0	0	2	15	92	0	0	0	0	0	0	-99	0	0	0	0	1	0	0	0	4	-99	0	-99	-99
201502050069	2015	2	5	0	1	1	1	0	0	92	6	24.708511	92.874	0	3	0	0	0	6	16	0	0	0	0	0	0	14	68	92	0	0	0	0	0	0	-99	0	0	0	0	1	0	0	-9	4	-99	0	-99	-99
201502050070	2015	2	5	0	1	1	0	1	0	205	5	6.275427	101.75348	0	2	0	0	0	5	5	0	0	0	0	0	0	4	39	205	0	0	0	0	0	0	-99	0	0	0	0	1	0	0	1	3	-99	0	-99	-99
201502050078	2015	2	5	0	1	1	1	0	0	19	6	22.341896	91.815117	0	3	0	0	0	6	17	0	0	0	0	0	0	2	21	19	0	0	0	0	0	0	-99	0	0	0	0	0	0	0	-9	4	-99	0	-99	-99
201502050079	2015	2	5	0	1	1	1	0	0	19	6	22.341896	91.815117	0	3	0	0	0	6	17	0	0	0	0	0	0	6	43	19	0	0	0	0	0	0	-99	0	0	0	0	0	0	0	0	4	-99	0	-99	-99
201502050083	2015	2	5	0	1	1	0	1	0	228	10	12.867085	44.981911	0	2	0	0	0	5	5	0	0	0	0	0	0	4	27	228	0	0	0	0	0	0	-99	0	8	0	3	0	0	0	-9	4	-99	0	-99	-99
201502060003	2015	2	6	0	1	1	1	0	0	95	10	34.726269	44.584908	1	3	0	0	0	6	16	0	0	0	0	0	0	17	94	95	0	0	0	0	0	0	-99	0	1	0	0	2	0	0	1	3	-99	0	-99	-99
201502060009	2015	2	6	0	1	1	1	0	0	153	6	26.966667	64.1	0	2	0	0	0	5	5	0	0	0	0	0	0	14	77	153	0	0	0	0	0	0	-99	0	1	0	0	0	0	0	0	4	-99	0	-99	-99
201502060011	2015	2	6	1	1	1	1	0	0	153	6	30.858804	69.055125	0	6	0	0	0	13	0	0	0	0	0	0	0	1	0	153	0	0	0	0	0	0	-99	0	0	0	0	0	0	0	0	4	-99	1	6	0
201502060017	2015	2	6	0	1	1	1	0	0	113	10	31.445839	12.989232	0	1	0	0	0	5	5	0	0	0	0	0	0	2	18	113	0	0	0	0	0	0	-99	0	0	0	0	0	0	0	1	3	-99	0	-99	-99
201502060018	2015	2	6	0	1	1	1	0	0	95	10	33.303566	44.371773	0	3	0	0	0	6	16	0	0	0	0	0	0	1	2	95	0	0	0	0	0	0	-99	0	2	0	0	7	0	0	-9	4	-99	0	-99	-99
201502060019	2015	2	6	0	1	1	1	0	0	95	10	33.057991	44.354839	0	3	0	0	0	6	16	0	0	0	0	0	0	14	67	95	0	0	0	0	0	0	-99	0	2	0	0	7	0	0	-9	4	-99	0	-99	-99
201502060020	2015	2	6	0	1	1	1	0	0	95	10	33.303566	44.371773	0	3	0	0	0	6	16	0	0	0	0	0	0	14	74	95	0	0	0	0	0	0	-99	0	2	0	0	8	0	0	-9	4	-99	0	-99	-99
201502060021	2015	2	6	0	1	1	1	0	0	95	10	33.303566	44.371773	0	3	0	0	0	6	16	0	0	0	0	0	0	1	7	95	0	0	0	0	0	0	-99	0	1	0	0	7	0	0	-9	4	-99	0	-99	-99
201502060022	2015	2	6	0	1	1	1	0	0	95	10	33.303566	44.371773	0	3	0	0	0	6	16	0	0	0	0	0	0	15	86	95	0	0	0	0	0	0	-99	0	1	0	0	7	0	0	-9	4	-99	0	-99	-99
201502060023	2015	2	6	0	1	1	1	0	0	95	10	33.07835	44.254719	0	3	0	0	0	6	16	0	0	0	0	0	0	3	23	95	0	0	0	0	0	0	-99	0	1	0	0	3	0	0	0	4	-99	0	-99	-99
201502060024	2015	2	6	0	1	1	1	0	0	95	10	33.303566	44.371773	0	3	0	0	0	6	16	0	0	0	0	0	0	14	74	95	0	0	0	0	0	0	-99	0	2	0	0	4	0	0	1	3	-99	0	-99	-99
201502060025	2015	2	6	0	1	1	0	1	0	95	10	33.349159	43.784199	0	1	0	0	0	5	4	0	0	0	0	0	0	4	34	95	0	0	0	0	0	0	-99	0	1	0	0	0	0	0	0	4	-99	0	-99	-99
201502060058	2015	2	6	0	1	1	1	0	0	60	10	31.200016	29.918828	0	3	0	0	0	6	16	0	0	0	0	0	0	1	6	60	0	0	0	0	0	0	-99	0	1	0	0	4	0	0	-9	4	-99	0	-99	-99
201502060059	2015	2	6	0	1	1	1	0	0	60	10	31.200016	29.918828	0	3	0	0	0	6	17	0	0	0	0	0	0	2	17	60	0	0	0	0	0	0	-99	0	0	0	0	0	0	0	0	4	-99	0	-99	-99
201502060070	2015	2	6	0	1	1	1	0	0	214	9	46.49819	30.716761	1	3	0	0	0	6	16	0	0	0	0	0	0	19	100	214	0	0	0	0	0	0	-99	0	0	0	0	0	0	0	0	4	-99	0	-99	-99
201502060071	2015	2	6	0	1	1	1	0	1	214	9	46.576332	30.794783	1	3	0	0	0	6	16	0	0	0	0	0	0	1	3	214	0	0	0	0	0	0	-99	0	0	0	0	0	0	0	1	3	-99	0	-99	-99
201502060072	2015	2	6	0	1	1	1	0	1	214	9	46.4218	30.718863	0	3	0	0	0	6	16	0	0	0	0	0	0	1	3	214	0	0	0	0	0	0	-99	0	0	0	0	0	0	0	0	4	-99	0	-99	-99
201502060084	2015	2	6	0	1	1	1	0	0	4	6	34.746013	62.604412	0	2	0	0	0	5	5	0	0	0	0	0	0	14	77	4	14	67	4	0	0	0	-99	0	1	0	0	1	0	0	0	4	-99	0	-99	-99
201502060094	2015	2	6	0	1	1	1	0	0	78	8	37.99749	23.762728	0	2	0	0	0	8	19	0	0	0	0	0	0	3	23	78	0	0	0	0	0	0	-99	0	0	0	0	0	0	0	1	3	-99	0	-99	-99
201502060095	2015	2	6	0	1	1	1	0	1	121	5	2.287274	111.83057	0	2	0	0	0	5	5	0	0	0	0	0	0	10	53	121	0	0	0	0	0	0	-99	0	0	0	0	0	0	0	1	3	-99	0	-99	-99
201502060096	2015	2	6	0	1	1	1	0	1	121	5	2.287274	111.83057	0	2	0	0	0	5	5	0	0	0	0	0	0	2	18	121	0	0	0	0	0	0	-99	0	0	0	0	0	0	0	1	3	-99	0	-99	-99
201502060102	2015	2	5	0	1	1	1	0	0	147	11	4.727082	7.152093	0	2	0	0	0	5	5	0	0	0	0	0	0	14	78	147	0	0	0	0	0	0	-99	0	2	0	0	40	0	0	0	4	-99	0	-99	-99
201502070001	2015	2	7	0	1	1	1	0	0	92	6	24.798346	93.94043	1	3	0	0	0	6	12	0	0	0	0	0	0	22	110	92	0	0	0	0	0	0	-99	0	0	0	0	0	0	0	0	4	-99	0	-99	-99
201502070018	2015	2	7	0	1	1	1	0	0	153	6	30.080168	69.352488	0	3	0	0	0	6	8	0	0	0	0	0	0	14	67	153	0	0	0	0	0	0	-99	0	0	0	0	3	0	0	0	4	-99	0	-99	-99
201502070021	2015	2	7	0	1	1	1	0	0	104	11	-1.292922	36.845237	0	1	0	0	0	5	2	0	0	0	0	0	0	2	15	104	0	0	0	0	0	0	2	0	4	0	0	0	0	0	1	3	-99	0	-99	-99
201502070023	2015	2	7	0	1	1	1	0	0	95	10	33.303566	44.371773	0	3	0	0	1	6	13	6	16	0	0	0	0	14	74	95	0	0	0	0	0	0	1	0	7	0	1	27	0	0	1	3	-99	0	-99	-99
201502070024	2015	2	7	0	1	1	1	0	0	95	10	33.303566	44.371773	0	3	0	0	0	6	16	0	0	0	0	0	0	1	7	95	0	0	0	0	0	0	-99	0	2	0	0	8	0	0	-9	4	-99	0	-99	-99
201502070025	2015	2	7	0	1	1	0	1	0	95	10	33.649971	44.261543	0	3	0	0	0	6	16	0	0	0	0	0	0	4	29	95	0	0	0	0	0	0	-99	0	3	0	0	10	0	0	1	4	-99	0	-99	-99
201502070028	2015	2	7	0	1	1	1	0	0	95	10	33.303566	44.371773	0	3	0	0	0	6	16	0	0	0	0	0	0	14	74	95	0	0	0	0	0	0	-99	0	4	0	0	7	0	0	-9	4	-99	0	-99	-99
201502070030	2015	2	7	0	1	1	1	0	0	19	6	23.791275	90.418205	0	3	0	0	0	6	17	0	0	0	0	0	0	8	49	19	0	0	0	0	0	0	-99	0	0	0	0	5	0	0	-9	4	-99	0	-99	-99
201502070031	2015	2	7	0	1	1	1	0	0	19	6	23.791275	90.418205	0	3	0	0	0	6	17	0	0	0	0	0	0	14	67	19	0	0	0	0	0	0	-99	0	0	0	0	1	0	0	-9	4	-99	0	-99	-99
201502070043	2015	2	7	0	1	1	1	0	0	19	6	23.791275	90.418205	0	3	0	0	0	6	17	0	0	0	0	0	0	8	49	19	0	0	0	0	0	0	-99	0	0	0	0	3	0	0	-9	4	-99	0	-99	-99
201502070044	2015	2	8	0	1	1	1	0	0	19	6	23.791275	90.418205	0	3	0	0	0	6	17	0	0	0	0	0	0	8	49	19	0	0	0	0	0	0	-99	0	0	0	0	0	0	0	-9	4	-99	0	-99	-99
201502070053	2015	2	7	0	1	1	1	0	0	200	10	36.201721	37.14352	0	3	0	0	0	6	11	0	0	0	0	0	0	14	75	200	0	0	0	0	0	0	-99	0	3	0	0	8	0	0	-9	4	-99	0	-99	-99
201502070057	2015	2	7	0	1	1	1	0	0	153	6	34.591389	71.238611	0	3	0	0	0	6	16	0	0	0	0	0	0	1	5	153	0	0	0	0	0	0	-99	0	0	0	0	3	0	0	1	3	-99	0	-99	-99
201502070058	2015	2	7	0	1	1	1	0	0	78	8	38.119756	23.86613	0	7	0	0	0	8	18	0	0	0	0	0	0	2	15	78	0	0	0	0	0	0	-99	0	0	0	0	0	0	0	1	3	-99	0	-99	-99
201502070059	2015	2	7	0	1	1	1	0	0	12	7	40.17857	44.535763	0	6	0	0	0	5	5	0	0	0	0	0	0	14	84	12	0	0	0	0	0	0	3	0	0	0	0	1	0	0	0	4	-99	1	1	0
201502070061	2015	2	7	0	1	1	1	0	0	19	6	24.632652	90.268301	0	3	0	0	0	6	17	0	0	0	0	0	0	3	23	19	0	0	0	0	0	0	-99	0	0	0	0	0	0	0	-9	4	-99	0	-99	-99
201502080017	2015	2	8	0	1	1	1	0	0	4	6	32.667654	65.901057	0	1	0	0	0	6	15	0	0	0	0	0	0	2	18	4	0	0	0	0	0	0	-99	0	0	0	0	4	0	0	1	3	-99	0	-99	-99
201502080018	2015	2	8	0	1	1	1	0	0	153	6	33.673295	70.991882	0	3	0	0	0	6	17	0	0	0	0	0	0	8	49	153	0	0	0	0	0	0	-99	0	0	0	0	0	0	0	1	3	-99	0	-99	-99
201502080023	2015	2	8	0	1	1	1	0	0	37	11	11.162543	14.013976	0	9	0	0	0	13	0	0	0	0	0	0	0	14	75	37	0	0	0	0	0	0	-99	0	0	0	0	0	0	0	1	3	-99	0	-99	-99
201502080025	2015	2	8	0	1	1	1	0	0	95	10	33.303566	44.371773	0	3	0	0	0	6	16	0	0	0	0	0	0	14	67	95	0	0	0	0	0	0	-99	0	1	0	0	8	0	0	0	4	-99	0	-99	-99
201502080026	2015	2	8	0	1	1	1	0	0	95	10	33.460819	44.157433	0	3	0	0	0	6	16	0	0	0	0	0	0	14	74	95	0	0	0	0	0	0	-99	0	2	0	0	5	0	0	-9	4	-99	0	-99	-99
201502080027	2015	2	8	0	1	1	1	0	0	95	10	30.510054	47.778095	0	1	0	0	0	5	5	0	0	0	0	0	0	3	26	95	0	0	0	0	0	0	-99	0	0	0	0	0	0	0	0	4	-99	0	-99	-99
201502080028	2015	2	8	0	1	1	1	0	0	95	10	35.143172	44.446499	0	3	0	0	0	6	11	0	0	0	0	0	0	17	94	95	0	0	0	0	0	0	-99	0	1	0	0	6	0	0	-9	4	-99	0	-99	-99
201502080029	2015	2	8	0	1	1	1	0	0	95	10	33.31065	44.038208	0	3	0	0	0	6	11	0	0	0	0	0	0	17	94	95	0	0	0	0	0	0	-99	0	3	0	0	7	0	0	-9	4	-99	0	-99	-99
201502080031	2015	2	8	0	1	1	1	0	0	60	10	29.831976	31.337257	0	3	0	0	0	6	17	0	0	0	0	0	0	1	2	60	0	0	0	0	0	0	-99	0	0	0	0	0	0	0	1	3	-99	0	-99	-99
201502080033	2015	2	8	0	1	1	1	0	0	153	6	33.974998	72.182312	0	1	0	0	0	5	5	0	0	0	0	0	0	22	109	153	0	0	0	0	0	0	-99	0	1	0	0	0	0	0	0	4	-99	0	-99	-99
201502080034	2015	2	8	0	1	1	1	0	0	19	6	23.791275	90.418205	0	3	0	0	0	6	17	0	0	0	0	0	0	8	49	19	0	0	0	0	0	0	-99	0	0	0	0	3	0	0	1	3	-99	0	-99	-99
201502080036	2015	2	8	0	1	1	1	0	0	19	6	23.791275	90.418205	0	3	0	0	0	6	17	0	0	0	0	0	0	19	99	19	0	0	0	0	0	0	-99	0	0	0	0	1	0	0	1	3	-99	0	-99	-99
201502080047	2015	2	8	0	1	1	1	0	0	19	6	23.889918	90.405833	0	3	0	0	0	6	14	0	0	0	0	0	0	20	0	19	0	0	0	0	0	0	-99	0	0	0	0	0	0	0	0	4	-99	0	-99	-99
201502080049	2015	2	8	0	1	1	1	0	0	19	6	22.866707	91.096931	0	3	0	0	0	6	17	0	0	0	0	0	0	2	14	19	0	0	0	0	0	0	-99	0	0	0	0	0	0	0	1	3	-99	0	-99	-99
201502080062	2015	2	9	0	1	1	1	0	0	214	9	50.008885	36.245943	0	3	0	0	0	6	16	0	0	0	0	0	0	1	0	214	0	0	0	0	0	0	-99	0	0	0	0	0	0	0	1	3	-99	0	-99	-99
201502080070	2015	2	8	0	1	1	1	0	0	182	11	2.059819	45.326115	0	3	0	0	0	6	8	0	0	0	0	0	0	14	77	209	14	77	182	0	0	0	-99	0	1	0	0	0	0	0	-9	4	-99	0	-99	-99
201502080076	2015	2	8	0	1	1	1	0	0	60	10	29.831976	31.337257	0	3	0	0	0	6	17	0	0	0	0	0	0	1	3	60	0	0	0	0	0	0	-99	0	0	0	0	1	0	0	1	3	-99	0	-99	-99
201502080077	2015	2	8	0	1	1	1	0	0	60	10	29.997915	30.963032	0	3	0	0	0	6	16	0	0	0	0	0	0	14	79	60	0	0	0	0	0	0	-99	0	0	0	0	0	0	0	-9	4	-99	0	-99	-99
201502080078	2015	2	8	0	1	1	1	0	1	60	10	30.647354	32.253088	0	3	0	0	0	6	16	0	0	0	0	0	0	8	49	60	0	0	0	0	0	0	-99	0	0	0	0	0	0	0	0	4	-99	0	-99	-99
201502080079	2015	2	8	0	1	1	1	0	1	60	10	30.647354	32.253088	0	3	0	0	0	6	16	0	0	0	0	0	0	8	49	60	0	0	0	0	0	0	-99	0	0	0	0	0	0	0	0	4	-99	0	-99	-99
201502080080	2015	2	8	0	1	1	1	0	1	60	10	30.647354	32.253088	0	3	0	0	0	6	16	0	0	0	0	0	0	8	49	60	0	0	0	0	0	0	-99	0	0	0	0	0	0	0	0	4	-99	0	-99	-99
201502080081	2015	2	8	0	1	1	1	0	0	60	10	29.831976	31.337257	0	3	0	0	0	6	16	0	0	0	0	0	0	20	0	60	0	0	0	0	0	0	-99	0	0	0	0	0	0	0	0	4	-99	0	-99	-99
201502080105	2015	2	8	0	1	1	1	0	0	19	6	23.791275	90.418205	0	3	0	0	0	6	17	0	0	0	0	0	0	3	25	19	0	0	0	0	0	0	-99	0	0	0	0	1	0	0	0	4	-99	0	-99	-99
201502080107	2015	2	8	0	1	1	0	1	0	228	10	13.988915	45.5771	0	9	0	0	0	13	0	0	0	0	0	0	0	4	29	228	0	0	0	0	0	0	-99	0	1	0	0	0	0	0	0	4	-99	0	-99	-99
201502080108	2015	2	8	0	1	1	1	0	0	60	10	31.126646	33.800865	0	3	0	0	0	6	16	0	0	0	0	0	0	8	49	60	0	0	0	0	0	0	-99	0	0	0	0	0	0	0	0	4	-99	0	-99	-99
201502090003	2015	2	7	0	1	1	1	0	0	60	10	30.084629	31.334314	0	3	0	0	0	6	15	0	0	0	0	0	0	10	55	113	0	0	0	0	0	0	-99	0	0	0	0	0	0	0	1	3	-99	0	-99	-99
201502090004	2015	2	7	0	1	1	1	0	0	18	10	26.217001	50.587414	0	2	0	0	0	8	19	0	0	0	0	0	0	3	25	18	0	0	0	0	0	0	-99	0	0	0	0	3	0	0	0	4	-99	0	-99	-99
201502090010	2015	2	9	0	1	1	1	0	0	4	6	33.968463	68.950166	0	3	0	0	0	6	8	0	0	0	0	0	0	4	29	4	0	0	0	0	0	0	3	0	3	0	3	0	0	0	0	4	-99	0	-99	-99
201502090011	2015	2	8	0	1	1	1	0	0	153	6	34.006004	71.53743	0	3	0	0	0	6	16	0	0	0	0	0	0	20	0	153	0	0	0	0	0	0	-99	0	0	0	0	0	0	0	0	4	-99	0	-99	-99
201502090015	2015	2	8	0	1	1	0	1	0	228	10	15.325443	44.211895	0	2	0	0	0	5	5	0	0	0	0	0	0	4	34	228	0	0	0	0	0	0	-99	-99	0	0	0	1	0	0	0	4	-99	0	-99	-99
201502090017	2015	2	9	0	1	1	1	0	0	95	10	33.303566	44.371773	0	3	0	0	1	6	13	0	0	0	0	0	0	14	74	95	0	0	0	0	0	0	1	0	19	0	1	42	0	0	1	3	-99	0	-99	-99
201502090018	2015	2	9	0	1	1	1	0	0	95	10	33.548306	44.415733	0	3	0	0	0	6	16	0	0	0	0	0	0	14	74	95	0	0	0	0	0	0	-99	0	1	0	0	7	0	0	-9	4	-99	0	-99	-99
201502090027	2015	2	9	0	1	1	1	0	0	4	6	34.317019	70.62809	0	2	0	0	0	5	5	0	0	0	0	0	0	15	86	4	0	0	0	0	0	0	-99	0	2	0	0	1	0	0	-9	4	-99	0	-99	-99
201502090030	2015	2	9	0	1	1	1	0	0	153	6	24.891115	67.143311	0	1	0	0	0	5	5	0	0	0	0	0	0	22	109	153	0	0	0	0	0	0	-99	0	1	0	0	0	0	0	1	3	-99	0	-99	-99
201502090031	2015	2	9	0	1	1	0	1	0	153	6	33.719958	70.365945	0	3	0	0	0	6	8	0	0	0	0	0	0	4	39	153	0	0	0	0	0	0	-99	0	1	0	0	0	0	0	0	4	-99	0	-99	-99
201502090035	2015	2	9	0	1	1	1	0	0	153	6	33.91758	71.562035	0	3	0	0	0	6	16	0	0	0	0	0	0	14	80	153	0	0	0	0	0	0	-99	0	0	0	0	0	0	0	0	4	-99	0	-99	-99
201502090066	2015	2	9	0	1	1	1	0	0	19	6	23.791275	90.418205	0	3	0	0	0	6	16	0	0	0	0	0	0	17	94	19	0	0	0	0	0	0	-99	0	0	0	0	1	0	0	0	4	-99	0	-99	-99
201502090072	2015	2	10	0	1	1	1	0	0	214	9	48.717792	39.673487	0	3	0	0	0	6	11	0	0	0	0	0	0	14	75	214	0	0	0	0	0	0	-99	0	0	0	0	0	0	0	-9	4	-99	0	-99	-99
201502090089	2015	2	10	0	1	1	1	0	0	19	6	22.341896	91.815117	0	3	0	0	0	6	17	0	0	0	0	0	0	20	0	19	0	0	0	0	0	0	1	1	0	0	0	1	0	1	0	4	-99	0	-99	-99
201502090091	2015	2	10	0	1	1	1	0	0	19	6	23.791275	90.418205	0	3	0	0	0	6	17	0	0	0	0	0	0	8	49	19	0	0	0	0	0	0	2	2	0	0	0	2	0	2	-9	4	-99	0	-99	-99
201502090092	2015	2	10	0	1	1	1	0	0	19	6	23.304613	90.930999	0	3	0	0	0	6	17	0	0	0	0	0	0	14	77	19	0	0	0	0	0	0	-99	0	0	0	0	1	0	0	-9	4	-99	0	-99	-99
201502090094	2015	2	9	0	1	1	1	0	0	60	10	31.10632	30.941975	0	2	0	0	0	5	5	0	0	0	0	0	0	3	25	60	0	0	0	0	0	0	-99	0	1	0	0	1	0	0	0	4	-99	0	-99	-99
201502090096	2015	2	9	1	1	1	1	0	0	4	6	34.232002	70.948915	0	6	0	0	0	5	5	0	0	0	0	0	0	14	77	153	0	0	0	0	0	0	-99	0	6	0	0	0	0	0	0	4	-99	1	9	0
201502100001	2015	2	10	0	1	1	1	0	1	95	10	33.057991	44.354839	0	3	0	0	0	6	15	0	0	0	0	0	0	14	74	95	0	0	0	0	0	0	-99	0	2	0	0	11	0	0	-9	4	-99	0	-99	-99
201502100002	2015	2	10	0	1	1	1	0	0	95	10	32.88018	44.386963	0	3	0	0	0	6	15	0	0	0	0	0	0	14	67	95	0	0	0	0	0	0	-99	0	0	0	0	2	0	0	1	3	-99	0	-99	-99
201502100005	2015	2	10	0	1	1	1	0	0	45	3	4.667128	-74.106056	0	3	0	0	0	6	16	0	0	0	0	0	0	14	84	45	0	0	0	0	0	0	-99	0	0	0	0	1	0	0	1	3	-99	0	-99	-99
201502100012	2015	2	10	0	1	1	1	0	0	4	6	34.417122	70.449593	0	1	0	0	0	6	16	0	0	0	0	0	0	2	15	4	0	0	0	0	0	0	-99	0	2	0	0	4	0	0	1	3	-99	0	-99	-99
201502100020	2015	2	10	0	1	1	1	0	0	60	10	31.303614	30.057511	0	3	0	0	0	6	16	0	0	0	0	0	0	2	21	60	0	0	0	0	0	0	-99	0	0	0	0	0	0	0	-9	4	-99	0	-99	-99
201502100021	2015	2	10	0	1	1	1	0	0	95	10	33.100024	44.583312	0	3	0	0	0	6	16	0	0	0	0	0	0	14	67	95	0	0	0	0	0	0	-99	0	2	0	0	6	0	0	0	4	-99	0	-99	-99
201502100022	2015	2	10	0	1	1	1	0	0	95	10	33.663533	44.378029	0	3	0	0	0	6	16	0	0	0	0	0	0	17	94	95	0	0	0	0	0	0	-99	0	3	0	0	9	0	0	0	4	-99	0	-99	-99
201502100024	2015	2	10	0	1	1	1	0	0	95	10	33.926586	44.772064	0	3	0	0	0	6	16	0	0	0	0	0	0	2	18	95	0	0	0	0	0	0	-99	0	0	0	0	0	0	0	1	3	-99	0	-99	-99
201502100025	2015	2	10	0	1	1	1	0	0	95	10	33.303566	44.371773	0	3	0	0	0	6	16	0	0	0	0	0	0	1	7	95	0	0	0	0	0	0	-99	0	0	0	0	9	0	0	-9	4	-99	0	-99	-99
201502100026	2015	2	10	0	1	1	1	0	0	95	10	33.303566	44.371773	0	3	0	0	0	6	16	0	0	0	0	0	0	1	2	95	0	0	0	0	0	0	-99	0	2	0	0	7	0	0	-9	4	-99	0	-99	-99
201502100027	2015	2	10	0	1	1	0	1	0	95	10	33.669689	44.381317	0	3	0	0	0	6	16	0	0	0	0	0	0	4	29	95	0	0	0	0	0	0	-99	0	1	0	0	2	0	0	0	4	-99	0	-99	-99
201502100031	2015	2	10	0	1	1	1	0	0	228	10	15.325443	44.211895	0	3	0	0	0	6	16	0	0	0	0	0	0	14	84	228	0	0	0	0	0	0	-99	0	0	0	0	0	0	0	0	4	-99	0	-99	-99
201502100033	2015	2	10	0	0	1	1	1	1	5	9	41.329434	19.822372	0	3	0	0	0	6	16	0	0	0	0	0	0	1	6	5	0	0	0	0	0	0	-99	0	0	0	0	0	0	0	1	3	-99	0	-99	-99
201502100034	2015	2	10	0	0	1	1	1	1	5	9	41.330143	19.816604	0	1	0	0	0	6	16	0	0	0	0	0	0	3	25	5	0	0	0	0	0	0	-99	0	0	0	0	0	0	0	1	3	-99	0	-99	-99
201502100035	2015	2	10	0	0	1	1	1	1	5	9	41.330541	19.821241	0	3	0	0	0	6	16	0	0	0	0	0	0	19	101	5	0	0	0	0	0	0	-99	0	0	0	0	0	0	0	0	4	-99	0	-99	-99
201502100036	2015	2	10	0	1	1	1	0	1	60	10	31.212225	34.117065	0	2	0	0	0	5	5	0	0	0	0	0	0	3	25	60	0	0	0	0	0	0	-99	0	0	0	0	1	0	0	-9	4	-99	0	-99	-99
201502100037	2015	2	10	0	1	1	1	0	1	60	10	31.212225	34.117065	0	2	0	0	0	5	5	0	0	0	0	0	0	13	63	60	0	0	0	0	0	0	-99	0	0	0	0	0	0	0	1	3	-99	0	-99	-99
201502100038	2015	2	10	0	1	1	0	1	0	182	11	1.114228	44.028706	1	2	0	0	0	5	5	0	0	0	0	0	0	4	29	182	0	0	0	0	0	0	-99	0	0	0	0	0	0	0	-9	4	-99	0	-99	-99
201502100042	2015	2	10	0	1	1	1	0	0	96	8	52.661236	-8.62301	0	3	0	0	0	6	17	0	0	0	0	0	0	14	76	96	0	0	0	0	0	0	-99	0	0	0	0	0	0	0	0	4	-99	0	-99	-99
201502100051	2015	2	10	0	1	1	1	0	0	214	9	46.477084	30.743243	0	3	0	0	0	6	16	0	0	0	0	0	0	1	8	214	0	0	0	0	0	0	-99	0	0	0	0	0	0	0	1	3	-99	0	-99	-99
201502100076	2015	2	10	0	1	1	1	0	1	95	10	33.057991	44.354839	0	3	0	0	0	6	15	0	0	0	0	0	0	14	74	95	0	0	0	0	0	0	-99	0	1	0	0	7	0	0	0	4	-99	0	-99	-99
201502100077	2015	2	10	0	1	1	0	1	0	95	10	34.192504	43.886392	0	3	0	0	1	6	15	0	0	0	0	0	0	4	27	95	0	0	0	0	0	0	1	0	7	0	1	27	0	0	1	4	-99	0	-99	-99
201502100082	2015	2	13	0	1	1	1	0	0	195	11	11.016492	29.717114	0	2	0	0	0	5	5	0	0	0	0	0	0	7	47	422	0	0	0	0	0	0	-99	0	0	0	0	0	0	0	-9	4	-99	0	-99	-99
201502100086	2015	2	10	0	1	1	1	0	0	19	6	23.791275	90.418205	0	7	0	0	0	8	19	0	0	0	0	0	0	22	110	19	0	0	0	0	0	0	-99	0	0	0	0	0	0	0	0	4	-99	0	-99	-99
201502100088	2015	2	10	0	1	1	1	0	0	19	6	23.791275	90.418205	0	3	0	0	0	6	17	0	0	0	0	0	0	20	0	19	0	0	0	0	0	0	-99	0	0	0	0	0	0	0	0	4	-99	0	-99	-99
201502100090	2015	2	10	0	1	1	1	0	0	19	6	24.41089	88.982169	0	3	0	0	0	6	17	0	0	0	0	0	0	2	21	19	0	0	0	0	0	0	-99	0	0	0	0	0	0	0	-9	4	-99	0	-99	-99
201502100103	2015	2	10	0	1	1	0	1	0	60	10	31.250196	34.24128	0	3	0	0	0	6	16	0	0	0	0	0	0	4	35	60	0	0	0	0	0	0	-99	0	0	0	0	0	0	0	-9	4	-99	0	-99	-99
201502110001	2015	2	11	0	1	1	1	0	0	95	10	33.057991	44.354839	0	3	0	0	1	6	15	0	0	0	0	0	0	4	36	95	14	67	95	0	0	0	1	0	5	0	1	12	0	0	-9	4	-99	0	-99	-99
201502110003	2015	2	11	0	1	1	1	0	0	4	6	34.417122	70.449593	0	3	0	0	0	6	16	0	0	0	0	0	0	3	23	4	14	67	4	0	0	0	-99	0	0	0	0	5	0	0	-9	4	-99	0	-99	-99
201502110010	2015	2	10	0	1	1	1	0	0	153	6	34.276111	71.387222	0	3	0	0	0	6	16	0	0	0	0	0	0	1	6	153	0	0	0	0	0	0	-99	0	0	0	0	0	0	0	1	3	-99	0	-99	-99
201502110024	2015	2	11	0	1	1	1	0	0	95	10	33.100529	44.584492	0	3	0	0	0	6	16	0	0	0	0	0	0	14	67	95	0	0	0	0	0	0	-99	0	1	0	0	4	0	0	0	4	-99	0	-99	-99
201502110025	2015	2	11	0	1	1	1	0	0	95	10	33.303566	44.371773	0	3	0	0	0	6	16	0	0	0	0	0	0	14	74	95	0	0	0	0	0	0	-99	0	1	0	0	7	0	0	-9	4	-99	0	-99	-99
201502110029	2015	2	10	0	1	1	1	0	0	4	6	34.994184	71.421059	1	7	0	0	0	8	18	0	0	0	0	0	0	8	49	4	0	0	0	0	0	0	-99	0	0	0	0	0	0	0	1	3	-99	0	-99	-99
201502110031	2015	2	11	0	1	1	1	0	0	4	6	34.264444	68.855	0	3	0	0	0	6	8	0	0	0	0	0	0	20	0	0	0	0	0	0	0	0	3	0	1	0	1	0	0	0	0	4	-99	0	-99	-99
201502110033	2015	2	11	0	1	1	1	0	0	160	5	16.22991	120.486845	0	1	0	0	0	5	3	0	0	0	0	0	0	2	15	160	0	0	0	0	0	0	-99	0	1	0	0	0	0	0	0	4	-99	0	-99	-99
201502110036	2015	2	11	0	1	1	0	1	0	146	11	13.31489	12.6047	0	3	0	0	1	6	13	0	0	0	0	0	0	4	34	146	0	0	0	0	0	0	1	0	1	0	1	0	0	0	-9	4	-99	0	-99	-99
201502110037	2015	2	11	0	1	1	0	1	0	153	6	33.833333	70.142778	0	3	0	0	0	6	11	0	0	0	0	0	0	4	27	153	0	0	0	0	0	0	-99	0	0	0	0	0	0	0	0	4	-99	0	-99	-99
201502110038	2015	2	11	0	1	1	1	0	0	147	11	11.704399	11.088539	0	3	0	0	1	6	13	0	0	0	0	0	0	2	15	147	0	0	0	0	0	0	1	0	1	0	1	0	0	0	1	3	-99	0	-99	-99
201502110040	2015	2	11	0	1	1	1	0	0	96	8	51.909217	-8.497344	0	3	0	0	0	6	31	0	0	0	0	0	0	14	76	96	0	0	0	0	0	0	-99	0	0	0	0	0	0	0	0	4	-99	0	-99	-99
201502110042	2015	2	11	0	1	1	1	0	0	19	6	22.798224	91.988153	0	3	0	0	0	6	17	0	0	0	0	0	0	19	105	19	0	0	0	0	0	0	-99	0	0	0	0	2	0	0	1	3	-99	0	-99	-99
201502110086	2015	2	10	0	1	1	1	0	0	214	9	50.6206	26.247985	0	3	0	0	0	6	11	0	0	0	0	0	0	4	28	214	0	0	0	0	0	0	-99	0	0	0	0	0	0	0	1	4	-99	0	-99	-99
201502110087	2015	2	11	0	1	1	1	0	0	153	6	24.891115	67.143311	0	2	0	0	0	5	5	0	0	0	0	0	0	14	67	153	0	0	0	0	0	0	2	0	1	0	0	1	0	0	0	4	-99	0	-99	-99
201502110089	2015	2	11	0	1	1	1	0	0	95	10	33.303566	44.371773	0	3	0	0	0	6	11	0	0	0	0	0	0	14	75	95	0	0	0	0	0	0	-99	0	7	0	0	19	0	0	1	3	-99	0	-99	-99
201502110090	2015	2	11	0	1	1	1	0	0	95	10	34.881348	44.62513	0	2	0	0	0	5	5	0	0	0	0	0	0	14	65	95	0	0	0	0	0	0	-99	0	2	0	0	0	0	0	0	4	-99	0	-99	-99
201502110091	2015	2	11	0	1	1	1	0	0	95	10	34.533753	43.483738	0	3	0	0	0	6	17	0	0	0	0	0	0	17	94	95	0	0	0	0	0	0	-99	0	0	0	0	5	0	0	1	3	-99	0	-99	-99
201502110092	2015	2	11	1	1	1	1	0	0	95	10	33.74324	44.623825	0	6	0	0	0	13	0	0	0	0	0	0	0	2	15	95	14	67	95	0	0	0	-99	0	0	0	0	0	0	0	0	4	-99	1	3	0
201502110098	2015	2	11	0	1	1	1	0	0	205	5	6.210408	101.820757	0	1	0	0	0	5	3	0	0	0	0	0	0	2	15	205	0	0	0	0	0	0	2	0	0	0	0	1	0	0	1	3	-99	0	-99	-99
201502110102	2015	2	11	0	1	1	1	0	0	19	6	24.368262	88.637614	0	3	0	0	0	6	17	0	0	0	0	0	0	8	49	19	0	0	0	0	0	0	-99	0	0	0	0	0	0	0	-9	4	-99	0	-99	-99
201502110103	2015	2	11	0	1	1	1	0	0	19	6	24.368262	88.637614	0	3	0	0	0	6	17	0	0	0	0	0	0	8	49	19	0	0	0	0	0	0	-99	0	0	0	0	0	0	0	1	3	-99	0	-99	-99
201502110104	2015	2	11	0	1	1	1	0	0	19	6	24.368262	88.637614	0	3	0	0	0	6	17	0	0	0	0	0	0	8	49	19	0	0	0	0	0	0	-99	0	0	0	0	0	0	0	-9	4	-99	0	-99	-99
201502110105	2015	2	11	0	1	1	1	0	0	19	6	24.368262	88.637614	0	3	0	0	0	6	17	0	0	0	0	0	0	8	49	19	0	0	0	0	0	0	-99	0	0	0	0	0	0	0	-9	4	-99	0	-99	-99
201502110107	2015	2	11	0	1	1	1	0	0	19	6	22.341896	91.815117	0	3	0	0	0	6	17	0	0	0	0	0	0	8	49	19	0	0	0	0	0	0	-99	0	0	0	0	0	0	0	0	4	-99	0	-99	-99
201502110108	2015	2	11	0	1	1	1	0	0	19	6	23.791275	90.418205	0	7	0	0	0	8	19	0	0	0	0	0	0	20	0	19	0	0	0	0	0	0	-99	0	0	0	0	0	0	0	0	4	-99	0	-99	-99
201502110109	2015	2	11	0	1	1	1	0	0	19	6	24.879712	91.889778	0	1	0	0	0	6	16	0	0	0	0	0	0	22	109	19	0	0	0	0	0	0	-99	0	0	0	0	0	0	0	1	3	-99	0	-99	-99
201502120004	2015	2	12	0	1	1	1	0	0	113	10	27.022867	14.441218	0	3	0	0	0	6	11	0	0	0	0	0	0	14	78	113	0	0	0	0	0	0	-99	0	4	0	0	0	0	0	-9	4	-99	0	-99	-99
201502120009	2015	2	12	0	1	1	0	1	0	95	10	32.982933	44.361595	0	3	0	0	0	6	15	0	0	0	0	0	0	4	34	95	0	0	0	0	0	0	-99	0	0	0	0	1	0	0	1	3	-99	0	-99	-99
201502120010	2015	2	12	0	1	1	1	0	0	95	10	33.117836	44.369362	0	3	0	0	0	6	16	0	0	0	0	0	0	14	74	95	0	0	0	0	0	0	-99	0	1	0	0	7	0	0	-9	4	-99	0	-99	-99
201502120014	2015	2	12	0	1	1	1	0	0	95	10	33.31065	44.038208	0	3	0	0	0	6	16	0	0	0	0	0	0	4	29	95	17	94	95	0	0	0	-99	0	2	0	0	11	0	0	0	4	-99	0	-99	-99
201502120015	2015	2	12	0	1	1	1	0	0	95	10	33.303566	44.371773	0	3	0	0	0	6	16	0	0	0	0	0	0	1	2	95	0	0	0	0	0	0	-99	0	1	0	0	5	0	0	-9	4	-99	0	-99	-99
201502120032	2015	2	12	0	1	1	1	0	0	153	6	29.033274	69.149955	0	3	0	0	0	6	16	0	0	0	0	0	0	20	0	153	0	0	0	0	0	0	-99	0	0	0	0	0	0	0	0	4	-99	0	-99	-99
201502120047	2015	2	12	0	1	1	1	0	0	5	9	41.326618	19.820873	0	3	0	0	0	6	28	0	0	0	0	0	0	20	0	5	0	0	0	0	0	0	-99	0	0	0	0	0	0	0	0	4	-99	0	-99	-99
201502120048	2015	2	12	0	1	1	1	0	0	60	10	30.426389	33.148611	0	2	0	0	0	5	5	0	0	0	0	0	0	3	25	60	0	0	0	0	0	0	-99	0	1	0	0	0	0	0	0	4	-99	0	-99	-99
201502120053	2015	2	12	0	1	1	1	0	0	146	11	13.211389	12.023889	0	3	0	0	1	6	13	0	0	0	0	0	0	20	0	146	0	0	0	0	0	0	1	1	0	0	0	0	0	0	0	4	-99	0	-99	-99
201502120054	2015	2	12	0	1	1	1	0	0	1004	11	6.212526	31.560787	0	3	0	0	0	6	7	0	0	0	0	0	0	1	7	65	0	0	0	0	0	0	-99	0	0	0	0	3	0	0	-9	4	-99	0	-99	-99
201502120055	2015	2	12	0	1	1	1	0	0	19	6	23.919267	90.717649	0	7	0	0	0	8	19	0	0	0	0	0	0	1	7	19	0	0	0	0	0	0	-99	0	1	0	0	2	0	0	1	3	-99	0	-99	-99
201502120056	2015	2	12	0	1	1	1	0	0	19	6	23.791275	90.418205	0	7	0	0	0	8	19	0	0	0	0	0	0	19	99	19	0	0	0	0	0	0	-99	0	1	0	0	0	0	0	1	3	-99	0	-99	-99
201502120057	2015	2	12	0	1	1	1	0	0	19	6	23.791275	90.418205	0	3	0	0	0	6	17	0	0	0	0	0	0	19	105	19	0	0	0	0	0	0	-99	0	0	0	0	3	0	0	1	3	-99	0	-99	-99
201502120058	2015	2	12	0	1	1	1	0	0	19	6	23.850077	90.25907	0	7	0	0	0	8	19	0	0	0	0	0	0	19	99	19	0	0	0	0	0	0	-99	0	0	0	0	2	0	0	1	3	-99	0	-99	-99
201502120059	2015	2	12	0	1	1	1	0	0	19	6	23.791275	90.418205	0	3	0	0	0	6	17	0	0	0	0	0	0	19	105	19	0	0	0	0	0	0	-99	0	0	0	0	1	0	0	1	3	-99	0	-99	-99
201502120060	2015	2	12	0	1	1	1	0	0	19	6	23.791275	90.418205	0	3	0	0	0	6	17	0	0	0	0	0	0	14	68	19	0	0	0	0	0	0	-99	0	0	0	0	3	0	0	-9	4	-99	0	-99	-99
201502120061	2015	2	12	0	1	1	1	0	0	19	6	23.791275	90.418205	0	3	0	0	0	6	17	0	0	0	0	0	0	14	68	19	0	0	0	0	0	0	-99	0	0	0	0	1	0	0	-9	4	-99	0	-99	-99
201502120065	2015	2	11	0	1	1	1	0	0	19	6	22.331667	90.8294	0	3	0	0	0	6	17	0	0	0	0	0	0	20	0	19	0	0	0	0	0	0	-99	0	0	0	0	0	0	0	0	4	-99	0	-99	-99
201502120067	2015	2	12	0	1	1	1	0	0	19	6	23.389612	88.945082	0	2	0	0	0	8	19	0	0	0	0	0	0	14	78	19	0	0	0	0	0	0	-99	0	0	0	0	2	0	0	1	3	-99	0	-99	-99
201502120070	2015	2	12	0	1	1	0	1	0	214	9	48.676868	39.572266	0	3	0	0	0	6	11	0	0	0	0	0	0	4	34	214	0	0	0	0	0	0	-99	0	0	0	0	0	0	0	-9	4	-99	0	-99	-99
201502120071	2015	2	12	0	1	1	0	1	0	214	9	48.806767	39.263958	0	3	0	0	0	6	11	0	0	0	0	0	0	4	34	214	0	0	0	0	0	0	-99	0	0	0	0	0	0	0	-9	4	-99	0	-99	-99
201502120072	2015	2	12	0	1	1	0	1	0	214	9	48.660713	39.470314	0	3	0	0	0	6	11	0	0	0	0	0	0	4	34	214	0	0	0	0	0	0	-99	0	1	0	0	6	0	0	-9	4	-99	0	-99	-99
201502120073	2015	2	12	0	1	1	0	1	0	214	9	48.750614	38.787846	0	3	0	0	0	6	11	0	0	0	0	0	0	4	34	214	0	0	0	0	0	0	-99	0	1	0	0	5	0	0	-9	4	-99	0	-99	-99
201502120074	2015	2	12	0	1	1	0	1	0	214	9	47.989849	37.263969	0	3	0	0	0	6	11	0	0	0	0	0	0	4	34	214	0	0	0	0	0	0	-99	0	0	0	0	5	0	0	-9	4	-99	0	-99	-99
201502120075	2015	2	12	0	1	1	0	1	0	214	9	47.854771	37.484367	0	3	0	0	0	6	11	0	0	0	0	0	0	4	34	214	0	0	0	0	0	0	-99	0	0	0	0	5	0	0	-9	4	-99	0	-99	-99
201502120088	2015	2	12	0	1	1	1	0	0	92	6	26.538662	90.693912	0	3	0	0	0	6	16	0	0	0	0	0	0	20	0	92	0	0	0	0	0	0	-99	0	0	0	0	0	0	0	0	4	-99	0	-99	-99
201502120089	2015	2	12	0	1	1	1	0	0	110	10	34.184605	36.424011	0	3	0	0	0	6	16	0	0	0	0	0	0	20	0	110	0	0	0	0	0	0	-99	0	0	0	0	0	0	0	0	4	-99	0	-99	-99
201502120094	2015	2	12	0	1	1	1	0	0	19	6	23.791275	90.418205	0	3	0	0	0	6	16	0	0	0	0	0	0	20	0	19	0	0	0	0	0	0	-99	0	0	0	0	0	0	0	-9	4	-99	0	-99	-99
201502120095	2015	2	12	0	1	1	1	0	0	19	6	23.791275	90.418205	0	3	0	0	0	6	16	0	0	0	0	0	0	20	0	19	0	0	0	0	0	0	-99	0	0	0	0	0	0	0	-9	4	-99	0	-99	-99
201502120096	2015	2	12	0	1	1	1	0	0	19	6	23.791275	90.418205	0	3	0	0	0	6	16	0	0	0	0	0	0	20	0	19	0	0	0	0	0	0	-99	0	0	0	0	0	0	0	-9	4	-99	0	-99	-99
201502120097	2015	2	12	0	1	1	1	0	0	19	6	23.791275	90.418205	0	3	0	0	0	6	16	0	0	0	0	0	0	20	0	19	0	0	0	0	0	0	-99	0	0	0	0	0	0	0	-9	4	-99	0	-99	-99
201502120098	2015	2	12	0	1	1	1	0	0	19	6	23.791275	90.418205	0	3	0	0	0	6	16	0	0	0	0	0	0	20	0	19	0	0	0	0	0	0	-99	0	0	0	0	0	0	0	-9	4	-99	0	-99	-99
201502120103	2015	2	12	0	1	1	1	0	0	19	6	23.543523	89.178367	0	7	0	0	0	8	19	0	0	0	0	0	0	1	7	19	0	0	0	0	0	0	-99	0	0	0	0	1	0	0	1	3	-99	0	-99	-99
201502120108	2015	2	12	0	1	1	0	1	0	159	3	-12.932081	-73.747786	0	9	0	0	0	13	0	0	0	0	0	0	0	4	27	159	0	0	0	0	0	0	-99	0	0	0	0	1	0	0	0	4	-99	0	-99	-99
201502120109	2015	2	12	0	1	1	1	0	0	92	6	11.004712	77.563163	0	3	0	0	0	6	31	0	0	0	0	0	0	22	109	92	0	0	0	0	0	0	-99	0	0	0	0	0	0	0	0	4	-99	0	-99	-99
201502120112	2015	2	12	0	1	1	1	0	0	214	9	48.637352	39.201656	0	3	0	0	0	6	16	0	0	0	0	0	0	19	100	214	0	0	0	0	0	0	-99	0	0	0	0	0	0	0	1	4	-99	0	-99	-99
201502130008	2015	2	13	0	1	1	1	0	0	4	6	36.098459	64.864461	0	2	0	0	0	5	5	0	0	0	0	0	0	3	25	4	0	0	0	0	0	0	-99	0	3	0	1	2	0	0	0	4	-99	0	-99	-99
201502130009	2015	2	13	0	1	1	1	0	0	4	6	34.896389	69.720278	0	2	0	0	0	5	5	0	0	0	0	0	0	3	22	4	15	86	4	0	0	0	-99	0	0	0	0	10	0	0	-9	4	-99	0	-99	-99
201502130015	2015	2	13	0	1	1	1	0	0	200	10	33.60722	36.314327	0	3	0	0	0	6	15	0	0	0	0	0	0	15	86	200	0	0	0	0	0	0	-99	0	6	0	0	24	0	0	-9	4	-99	0	-99	-99
201502130019	2015	2	13	0	1	1	1	0	0	95	10	33.303566	44.371773	0	3	0	0	0	6	15	0	0	0	0	0	0	14	67	95	0	0	0	0	0	0	-99	0	0	0	0	1	0	0	1	3	-99	0	-99	-99
201502130027	2015	2	13	0	1	1	0	1	0	4	6	35.226472	71.530139	0	3	0	0	0	6	16	0	0	0	0	0	0	4	35	4	0	0	0	0	0	0	-99	0	0	0	0	2	0	0	1	4	-99	0	-99	-99
201502130028	2015	2	13	0	1	1	1	0	0	4	6	35.226472	71.530139	0	3	0	0	0	6	16	0	0	0	0	0	0	20	0	0	0	0	0	0	0	0	-99	0	0	0	0	0	0	0	0	4	-99	0	-99	-99
201502130035	2015	2	13	0	1	1	1	0	0	153	6	30.200819	66.994354	0	3	0	0	0	6	15	0	0	0	0	0	0	20	0	153	0	0	0	0	0	0	-99	0	0	0	0	0	0	0	0	4	-99	0	-99	-99
201502130036	2015	2	13	0	1	1	1	0	0	209	10	36.975594	38.426399	0	3	0	0	0	6	12	0	0	0	0	0	0	3	24	209	14	77	209	0	0	0	-99	0	0	0	0	3	0	0	1	3	-99	0	-99	-99
201502130038	2015	2	13	0	1	1	1	0	0	153	6	33.443794	70.907092	0	3	0	0	0	6	16	0	0	0	0	0	0	8	49	153	0	0	0	0	0	0	-99	0	0	0	0	0	0	0	0	4	-99	0	-99	-99
201502130044	2015	2	13	0	1	1	1	0	0	96	8	51.907851	-8.504788	0	3	0	0	0	6	31	0	0	0	0	0	0	14	76	96	0	0	0	0	0	0	-99	0	0	0	0	0	0	0	0	4	-99	0	-99	-99
201502130045	2015	2	13	0	1	1	1	0	0	603	8	54.71322	-5.812486	0	7	0	0	0	8	19	0	0	0	0	0	0	14	76	233	0	0	0	0	0	0	-99	0	0	0	0	0	0	0	1	3	-99	0	-99	-99
201502130050	2015	2	13	0	1	1	1	0	0	160	5	14.810284	121.047709	0	2	0	0	0	5	3	0	0	0	0	0	0	1	12	160	0	0	0	0	0	0	-99	0	4	0	0	0	0	0	-9	4	-99	0	-99	-99
201502130053	2015	2	13	0	1	1	1	0	0	19	6	24.227344	88.751957	0	3	0	0	0	6	17	0	0	0	0	0	0	20	0	19	0	0	0	0	0	0	-99	0	0	0	0	0	0	0	-9	4	-99	0	-99	-99
201502130070	2015	2	13	0	0	1	1	1	0	104	11	1.746832	40.053448	0	2	0	0	0	6	7	5	5	0	0	0	0	3	23	104	0	0	0	0	0	0	-99	0	0	0	0	0	0	0	-9	4	-99	0	-99	-99
201502130071	2015	2	13	1	1	1	1	0	0	95	10	33.303566	44.371773	0	1	6	0	0	5	5	0	0	0	0	0	0	14	77	95	0	0	0	0	0	0	-99	0	8	0	0	1	0	0	0	4	-99	1	9	0
201502130076	2015	2	13	0	1	1	1	0	0	228	10	13.985013	45.558479	0	3	0	0	1	6	15	0	0	0	0	0	0	3	22	228	0	0	0	0	0	0	1	0	1	0	1	0	0	0	1	3	-99	0	-99	-99
201502130077	2015	2	13	0	1	1	1	0	1	205	5	6.015439	101.952028	0	3	0	0	0	6	17	0	0	0	0	0	0	16	90	205	0	0	0	0	0	0	-99	0	0	0	0	0	0	0	1	4	-99	0	-99	-99
201502130078	2015	2	13	0	1	1	1	0	0	19	6	24.458006	88.337244	0	7	0	0	0	11	0	0	0	0	0	0	0	19	100	19	0	0	0	0	0	0	-99	0	0	0	0	0	0	0	1	4	-99	0	-99	-99
201502130080	2015	2	13	0	1	1	1	0	0	147	11	9.159633	7.338608	0	2	0	0	0	5	5	0	0	0	0	0	0	3	22	147	0	0	0	0	0	0	-99	0	0	0	0	2	0	0	0	4	-99	0	-99	-99
201502130081	2015	2	13	0	1	1	1	0	1	205	5	6.026201	101.948617	0	3	0	0	0	6	17	0	0	0	0	0	0	3	25	205	0	0	0	0	0	0	-99	0	0	0	0	0	0	0	0	4	-99	0	-99	-99
201502140003	2015	2	14	0	1	1	1	0	0	153	6	24.891115	67.143311	0	1	0	0	0	5	5	0	0	0	0	0	0	15	87	153	0	0	0	0	0	0	-99	0	0	0	0	3	0	0	1	3	-99	0	-99	-99
201502140015	2015	2	14	0	1	1	1	0	0	153	6	29.552311	66.020508	0	1	0	0	0	6	12	0	0	0	0	0	0	2	14	153	0	0	0	0	0	0	-99	0	0	0	0	0	0	0	1	4	-99	0	-99	-99
201502140017	2015	2	14	0	1	1	0	1	0	60	10	30.65881	33.717453	0	2	0	0	0	5	5	0	0	0	0	0	0	4	34	60	0	0	0	0	0	0	-99	0	0	0	0	1	0	0	0	4	-99	0	-99	-99
201502140018	2015	2	14	0	1	1	0	1	0	123	11	14.928648	-3.374197	0	2	0	0	0	5	5	0	0	0	0	0	0	4	27	123	0	0	0	0	0	0	-99	0	7	0	5	3	0	0	0	4	-99	0	-99	-99
201502140023	2015	2	14	0	1	1	1	0	0	228	10	15.325443	44.211895	0	2	0	0	0	6	7	5	5	0	0	0	0	14	84	228	0	0	0	0	0	0	-99	0	0	0	0	0	0	0	1	3	-99	0	-99	-99
201502140027	2015	2	14	0	1	1	1	0	0	4	6	34.391319	68.840244	1	3	0	0	0	6	8	0	0	0	0	0	0	3	25	4	0	0	0	0	0	0	-99	0	1	0	0	1	0	0	0	4	-99	0	-99	-99
201502140029	2015	2	12	0	1	1	1	0	0	4	6	31.603521	65.707443	0	1	0	0	0	5	5	0	0	0	0	0	0	2	18	4	0	0	0	0	0	0	-99	0	1	0	0	0	0	0	0	4	-99	0	-99	-99
201502140032	2015	2	14	0	1	1	1	0	0	153	6	24.891115	67.143311	0	2	0	0	0	5	5	0	0	0	0	0	0	1	7	153	0	0	0	0	0	0	3	0	1	0	0	0	0	0	0	4	-99	0	-99	-99
201502140034	2015	2	14	0	0	1	1	1	0	160	5	9.639358	123.855562	0	1	0	0	0	5	3	0	0	0	0	0	0	10	54	160	0	0	0	0	0	0	1	1	1	0	0	0	0	0	-9	4	-99	0	-99	-99
201502140046	2015	2	14	1	1	1	1	0	0	4	6	36.198591	65.349432	0	6	0	0	0	13	0	0	0	0	0	0	0	1	12	4	0	0	0	0	0	0	-99	0	0	0	0	0	0	0	1	3	-99	1	2	0
201502140054	2015	2	14	0	1	1	0	1	0	4	6	33.992712	68.70794	0	3	0	0	0	6	11	0	0	0	0	0	0	4	36	4	0	0	0	0	0	0	-99	0	0	0	0	1	0	0	0	4	-99	0	-99	-99
201502140057	2015	2	14	0	1	1	1	0	0	19	6	23.791275	90.418205	0	3	0	0	0	6	17	0	0	0	0	0	0	19	99	19	0	0	0	0	0	0	-99	0	0	0	0	3	0	0	1	3	-99	0	-99	-99
201502140058	2015	2	14	0	1	1	1	0	0	19	6	23.791275	90.418205	0	3	0	0	0	6	17	0	0	0	0	0	0	8	49	19	0	0	0	0	0	0	-99	0	0	0	0	2	0	0	-9	4	-99	0	-99	-99
201502140059	2015	2	14	0	1	1	1	0	0	19	6	23.791275	90.418205	0	3	0	0	0	6	16	0	0	0	0	0	0	20	0	19	0	0	0	0	0	0	-99	0	0	0	0	0	0	0	-9	4	-99	0	-99	-99
201502140066	2015	2	14	0	1	1	1	0	0	92	6	26.846694	80.946166	0	3	0	0	0	6	15	0	0	0	0	0	0	2	15	92	0	0	0	0	0	0	1	1	0	0	0	0	0	0	0	4	-99	0	-99	-99
201502140072	2015	2	14	1	1	1	1	0	0	147	11	7.55	6.233333	0	6	0	0	0	13	0	0	0	0	0	0	0	2	18	147	0	0	0	0	0	0	10	0	0	0	0	0	0	0	1	3	-99	1	1	0
201502140073	2015	2	14	1	1	1	1	0	0	228	10	15.325443	44.211895	0	6	0	0	0	13	0	0	0	0	0	0	0	14	83	228	0	0	0	0	0	0	-99	0	0	0	0	0	0	0	0	4	-99	1	3	0
201502140074	2015	2	14	0	0	1	1	1	0	121	5	3.138943	101.691315	0	7	0	0	0	8	18	0	0	0	0	0	0	14	84	121	0	0	0	0	0	0	-99	0	0	0	0	0	0	0	1	3	-99	0	-99	-99
201502150003	2015	2	15	0	1	1	0	1	0	200	10	35.528404	35.79232	0	3	0	0	0	6	11	0	0	0	0	0	0	4	34	200	0	0	0	0	0	0	-99	0	0	0	0	0	0	0	-9	4	-99	0	-99	-99
201502150013	2015	2	15	0	1	1	1	0	0	153	6	33.671638	73.056068	0	1	0	0	0	5	5	0	0	0	0	0	0	15	87	153	0	0	0	0	0	0	-99	0	1	0	0	2	0	0	1	3	-99	0	-99	-99
201502150014	2015	2	15	0	1	1	1	0	0	182	11	2.059819	45.326115	0	2	0	0	0	5	3	0	0	0	0	0	0	2	18	182	0	0	0	0	0	0	2	0	1	0	0	0	0	0	-9	4	-99	0	-99	-99
201502150015	2015	2	15	0	1	1	1	0	0	4	6	36.178903	68.745306	0	1	0	0	0	6	29	0	0	0	0	0	0	14	68	4	0	0	0	0	0	0	-99	0	0	0	0	6	0	0	1	3	-99	0	-99	-99
201502150016	2015	2	15	0	1	1	0	1	0	153	6	33.712904	70.332588	0	9	0	0	0	13	0	0	0	0	0	0	0	4	27	153	0	0	0	0	0	0	8	0	8	0	8	1	0	0	-9	4	-99	0	-99	-99
201502150017	2015	2	15	0	1	1	1	0	0	123	11	16.224786	-0.036487	0	3	0	0	1	6	13	0	0	0	0	0	0	7	47	422	0	0	0	0	0	0	1	0	1	0	1	7	0	0	-9	4	-99	0	-99	-99
201502150021	2015	2	15	0	1	1	1	0	0	95	10	33.303566	44.371773	0	3	0	0	0	6	16	0	0	0	0	0	0	19	99	95	0	0	0	0	0	0	-99	0	2	0	0	8	0	0	1	3	-99	0	-99	-99
201502150024	2015	2	15	0	1	1	1	0	0	95	10	33.303566	44.371773	0	3	0	0	0	6	16	0	0	0	0	0	0	1	2	95	0	0	0	0	0	0	-99	0	1	0	0	9	0	0	-9	4	-99	0	-99	-99
201502150025	2015	2	15	0	1	1	1	0	1	95	10	33.303566	44.371773	0	3	0	0	0	6	16	0	0	0	0	0	0	14	67	95	0	0	0	0	0	0	-99	0	0	0	0	3	0	0	-9	4	-99	0	-99	-99
201502150026	2015	2	15	0	1	1	1	0	1	95	10	33.303566	44.371773	0	3	0	0	0	6	16	0	0	0	0	0	0	14	67	95	0	0	0	0	0	0	-99	0	0	0	0	0	0	0	-9	4	-99	0	-99	-99
201502150029	2015	2	15	0	1	1	1	0	0	95	10	33.666667	44.3	0	3	0	0	0	6	15	6	16	0	0	0	0	20	0	95	0	0	0	0	0	0	-99	0	0	0	0	0	0	0	0	4	-99	0	-99	-99
201502150030	2015	2	15	0	1	1	1	0	0	95	10	33.666667	44.3	0	3	0	0	0	6	17	0	0	0	0	0	0	20	0	95	0	0	0	0	0	0	-99	0	0	0	0	0	0	0	0	4	-99	0	-99	-99
201502150031	2015	2	15	0	1	1	1	0	0	95	10	33.666667	44.3	0	3	0	0	0	6	17	0	0	0	0	0	0	20	0	95	0	0	0	0	0	0	-99	0	0	0	0	0	0	0	0	4	-99	0	-99	-99
201502150032	2015	2	15	0	1	1	1	0	0	95	10	33.666667	44.3	0	3	0	0	0	6	17	0	0	0	0	0	0	20	0	95	0	0	0	0	0	0	-99	0	0	0	0	0	0	0	0	4	-99	0	-99	-99
201502150033	2015	2	15	0	1	1	1	0	0	95	10	33.666667	44.3	0	3	0	0	0	6	17	0	0	0	0	0	0	20	0	95	0	0	0	0	0	0	-99	0	0	0	0	0	0	0	0	4	-99	0	-99	-99
201502150034	2015	2	15	0	1	1	1	0	0	95	10	33.666667	44.3	0	3	0	0	0	6	17	0	0	0	0	0	0	20	0	95	0	0	0	0	0	0	-99	0	0	0	0	0	0	0	0	4	-99	0	-99	-99
201502150035	2015	2	15	0	1	1	1	0	0	95	10	33.666667	44.3	0	3	0	0	0	6	17	0	0	0	0	0	0	20	0	95	0	0	0	0	0	0	-99	0	0	0	0	0	0	0	0	4	-99	0	-99	-99
201502150038	2015	2	15	0	1	1	0	1	0	153	6	28.633307	69.190369	0	3	0	0	0	6	8	0	0	0	0	0	0	4	34	153	0	0	0	0	0	0	-99	0	1	0	0	2	0	0	0	4	-99	0	-99	-99
201502150045	2015	2	15	0	1	1	1	0	0	95	10	33.303566	44.371773	0	3	0	0	0	6	16	0	0	0	0	0	0	2	21	95	0	0	0	0	0	0	-99	0	2	0	0	9	0	0	-9	4	-99	0	-99	-99
201502150049	2015	2	15	0	1	1	1	0	0	153	6	28.54439	68.218002	0	3	2	0	0	6	12	5	5	0	0	0	0	3	25	153	4	34	153	0	0	0	-99	0	0	0	0	0	0	0	0	4	-99	0	-99	-99
201502150050	2015	2	15	0	1	1	1	0	0	153	6	30.200819	66.994354	0	2	0	0	0	5	5	0	0	0	0	0	0	1	8	153	0	0	0	0	0	0	-99	0	2	0	0	0	0	0	-9	4	-99	0	-99	-99
201502150051	2015	2	15	0	1	1	1	0	0	138	5	22.036199	98.133856	0	3	0	0	0	6	8	0	0	0	0	0	0	14	67	138	0	0	0	0	0	0	-99	0	1	0	0	0	0	0	0	4	-99	0	-99	-99
201502150052	2015	2	15	0	1	1	1	0	0	60	10	30.465685	31.184652	0	2	0	0	0	5	2	5	4	0	0	0	0	3	24	60	0	0	0	0	0	0	-99	0	1	0	0	3	0	0	1	3	-99	0	-99	-99
201502150053	2015	2	15	0	1	1	1	0	0	153	6	34.149992	71.7334	0	3	0	0	0	6	7	6	11	6	16	0	0	8	49	153	0	0	0	0	0	0	-99	0	0	0	0	0	0	0	0	4	-99	0	-99	-99
201502150058	2015	2	15	0	1	1	1	0	0	200	10	33.515244	36.292084	0	3	0	0	0	6	11	0	0	0	0	0	0	14	75	200	0	0	0	0	0	0	-99	0	0	0	0	0	0	0	0	4	-99	0	-99	-99
201502150060	2015	2	15	0	1	1	1	0	0	160	5	17.97566	120.483914	0	2	0	0	0	5	5	0	0	0	0	0	0	8	48	160	0	0	0	0	0	0	-99	0	1	0	0	0	0	0	1	3	-99	0	-99	-99
201502150061	2015	2	15	0	1	1	1	0	0	147	11	9.537222	8.8925	0	1	0	0	0	5	5	0	0	0	0	0	0	14	84	147	0	0	0	0	0	0	-99	0	1	0	0	1	0	0	0	4	-99	0	-99	-99
201502150063	2015	2	15	0	1	1	1	0	0	155	10	31.537834	34.489532	0	7	0	0	0	8	18	0	0	0	0	0	0	22	109	155	0	0	0	0	0	0	-99	0	0	0	0	0	0	0	1	3	-99	0	-99	-99
201502150071	2015	2	15	0	1	1	1	1	0	19	6	23.75656	90.464401	0	3	0	0	0	6	17	0	0	0	0	0	0	20	0	19	0	0	0	0	0	0	1	1	0	0	0	1	0	0	0	4	-99	0	-99	-99
201502150090	2015	2	15	0	1	1	1	0	0	19	6	24.85	89.366667	0	3	7	0	0	6	17	8	18	0	0	0	0	19	99	19	0	0	0	0	0	0	-99	0	0	0	0	0	0	0	1	3	-99	0	-99	-99
201502150101	2015	2	15	0	1	1	0	1	1	214	9	47.098835	37.81987	1	3	0	0	0	6	11	0	0	0	0	0	0	4	29	214	0	0	0	0	0	0	-99	0	2	0	0	8	0	0	-9	4	-99	0	-99	-99
201502150102	2015	2	15	0	1	1	0	1	1	214	9	47.098835	37.81987	0	3	0	0	0	6	11	0	0	0	0	0	0	4	34	214	0	0	0	0	0	0	-99	0	2	0	0	7	0	0	-9	4	-99	0	-99	-99
201502150111	2015	2	15	0	1	1	1	0	0	19	6	23.545313	89.172279	0	3	0	0	0	6	17	0	0	0	0	0	0	2	14	19	0	0	0	0	0	0	-99	0	0	0	0	1	0	0	-9	4	-99	0	-99	-99
201502150115	2015	2	15	0	1	1	1	0	0	95	10	33.126019	44.685215	0	3	0	0	0	6	16	0	0	0	0	0	0	14	67	95	0	0	0	0	0	0	-99	0	3	0	0	0	0	0	0	4	-99	0	-99	-99
201502150117	2015	2	14	0	1	1	1	0	0	18	10	26.231722	50.509521	1	3	0	0	0	6	17	0	0	0	0	0	0	20	0	18	0	0	0	0	0	0	-99	0	0	0	0	0	0	0	0	4	-99	0	-99	-99
201502150119	2015	2	15	0	1	1	1	0	0	45	3	4.667128	-74.106056	0	3	0	0	0	6	16	0	0	0	0	0	0	20	0	45	0	0	0	0	0	0	-99	0	0	0	0	0	0	0	-9	4	-99	0	-99	-99
201502150120	2015	2	14	0	1	1	1	0	0	141	6	27.032379	85.003066	0	7	0	0	0	8	18	0	0	0	0	0	0	10	53	141	0	0	0	0	0	0	15	0	0	0	0	0	0	0	1	3	-99	0	-99	-99
201502160015	2015	2	16	0	1	1	1	0	0	95	10	33.303566	44.371773	0	3	0	0	0	6	11	0	0	0	0	0	0	14	75	95	0	0	0	0	0	0	-99	0	2	0	0	7	0	0	-9	4	-99	0	-99	-99
201502160016	2015	2	16	0	1	1	1	0	0	95	10	33.460819	44.157433	0	3	0	0	0	6	16	0	0	0	0	0	0	14	74	95	0	0	0	0	0	0	-99	0	2	0	0	4	0	0	-9	4	-99	0	-99	-99
201502160024	2015	2	16	0	1	1	1	0	0	153	6	34.006004	71.53743	0	3	0	0	0	6	16	0	0	0	0	0	0	20	0	153	0	0	0	0	0	0	-99	0	0	0	0	0	0	0	0	4	-99	0	-99	-99
201502160027	2015	2	16	0	1	1	1	0	0	153	6	33.7714	72.7518	0	3	0	0	0	6	17	0	0	0	0	0	0	8	49	153	0	0	0	0	0	0	-99	0	0	0	0	0	0	0	0	4	-99	0	-99	-99
201502160028	2015	2	16	0	1	1	1	0	0	92	6	26.819489	92.771586	0	3	0	0	0	6	16	0	0	0	0	0	0	19	100	92	0	0	0	0	0	0	-99	0	0	0	0	0	0	0	0	4	-99	0	-99	-99
201502160029	2015	2	16	0	1	1	1	0	0	60	10	31.126646	33.800865	0	2	0	0	0	5	5	0	0	0	0	0	0	4	36	60	14	67	60	0	0	0	-99	0	0	0	0	3	0	0	0	4	-99	0	-99	-99
201502160031	2015	2	16	0	1	1	1	0	0	603	8	54.607712	-5.95621	0	3	0	0	0	6	31	0	0	0	0	0	0	20	0	233	0	0	0	0	0	0	-99	0	0	0	0	0	0	0	0	4	-99	0	-99	-99
201502160032	2015	2	16	0	1	1	1	0	0	19	6	23.791275	90.418205	0	3	0	0	0	6	17	0	0	0	0	0	0	14	83	19	0	0	0	0	0	0	-99	0	0	0	0	5	0	0	-9	4	-99	0	-99	-99
201502160033	2015	2	16	0	1	1	1	0	0	200	10	36.201721	37.14352	0	3	0	0	0	6	11	0	0	0	0	0	0	14	75	200	0	0	0	0	0	0	-99	0	9	0	0	20	0	0	1	3	-99	0	-99	-99
201502160088	2015	2	15	0	1	1	1	0	0	19	6	24.90382	91.859271	0	3	0	0	0	6	17	0	0	0	0	0	0	19	105	19	0	0	0	0	0	0	-99	0	0	0	0	2	0	0	1	3	-99	0	-99	-99
201502160092	2015	2	16	0	1	1	1	0	0	19	6	23.996284	90.38543	0	7	0	0	0	8	19	0	0	0	0	0	0	1	5	19	0	0	0	0	0	0	-99	0	0	0	0	0	0	0	1	3	-99	0	-99	-99
201502160093	2015	2	16	0	1	1	0	1	1	214	9	47.098835	37.81987	0	3	0	0	0	6	11	0	0	0	0	0	0	4	34	214	0	0	0	0	0	0	-99	0	1	0	0	7	0	0	-9	4	-99	0	-99	-99
201502160102	2015	2	16	0	1	1	1	0	0	214	9	48.749912	38.501175	0	3	0	0	0	6	11	0	0	0	0	0	0	14	75	214	0	0	0	0	0	0	-99	0	0	0	0	0	0	0	-9	4	-99	0	-99	-99
201502160112	2015	2	16	0	1	1	0	1	0	214	9	48.694492	38.50779	1	3	0	0	0	6	11	0	0	0	0	0	0	4	36	214	0	0	0	0	0	0	-99	0	0	0	0	0	0	0	-9	4	-99	0	-99	-99
201502160113	2015	2	16	0	1	1	1	0	0	214	9	48.635265	38.380325	0	3	0	0	0	6	11	0	0	0	0	0	0	14	75	214	0	0	0	0	0	0	-99	0	0	0	0	0	0	0	0	4	-99	0	-99	-99
201502160125	2015	2	16	0	1	1	1	0	0	6	10	35.40238	8.128199	0	3	0	0	0	6	16	0	0	0	0	0	0	20	0	6	0	0	0	0	0	0	1	0	1	0	1	0	0	0	0	4	-99	0	-99	-99
201502170020	2015	2	17	0	1	1	1	0	0	4	6	34.516895	69.147011	0	3	0	0	0	6	29	0	0	0	0	0	0	2	18	4	0	0	0	0	0	0	-99	0	0	0	0	1	0	0	1	3	-99	0	-99	-99
201502170022	2015	2	17	0	1	1	0	1	0	182	11	2.14383	45.118061	0	3	0	0	0	6	16	0	0	0	0	0	0	4	34	182	0	0	0	0	0	0	-99	0	0	0	0	3	0	0	-9	4	-99	0	-99	-99
201502170023	2015	2	17	0	1	1	1	0	0	95	10	33.303566	44.371773	0	3	0	0	0	6	16	0	0	0	0	0	0	1	2	95	0	0	0	0	0	0	-99	0	1	0	0	3	0	0	-9	4	-99	0	-99	-99
201502170028	2015	2	17	0	1	1	1	0	0	95	10	33.95	44.983333	0	3	0	0	0	6	16	0	0	0	0	0	0	17	94	95	0	0	0	0	0	0	-99	0	1	0	0	3	0	0	-9	4	-99	0	-99	-99
201502170078	2015	2	17	0	1	1	1	0	0	4	6	35.840067	65.23228	0	2	0	0	0	5	5	9	23	0	0	0	0	14	77	4	0	0	0	0	0	0	-99	0	1	0	0	0	0	0	0	4	-99	1	1	0
201502170079	2015	2	17	0	1	1	1	0	0	19	6	24.365984	88.642828	0	3	2	0	0	6	17	9	23	0	0	0	0	22	109	19	0	0	0	0	0	0	20	0	0	0	0	2	0	0	0	4	-99	0	-99	-99
201502170080	2015	2	17	0	1	1	1	0	0	603	8	54.607712	-5.95621	0	5	2	0	0	5	5	0	0	0	0	0	0	14	68	233	0	0	0	0	0	0	5	0	0	0	0	1	0	0	1	3	-99	1	5	0
201502170084	2015	2	17	0	1	1	1	0	0	147	11	4.74	7.083	0	3	2	0	0	6	16	5	2	9	23	0	0	14	84	147	0	0	0	0	0	0	-99	0	1	0	0	5	0	0	0	4	-99	0	-99	-99
201502170086	2015	2	17	0	1	1	1	0	0	19	6	23.791275	90.418205	0	3	0	0	0	6	17	0	0	0	0	0	0	14	68	19	0	0	0	0	0	0	-99	0	0	0	0	4	0	0	-9	4	-99	0	-99	-99
201502170087	2015	2	17	0	1	1	1	0	0	19	6	23.791275	90.418205	0	3	0	0	0	6	17	0	0	0	0	0	0	8	48	19	14	68	19	0	0	0	-99	0	0	0	0	2	0	0	-9	4	-99	0	-99	-99
201502170088	2015	2	17	0	1	1	1	0	0	19	6	23.791275	90.418205	0	3	0	0	0	6	17	0	0	0	0	0	0	14	67	19	0	0	0	0	0	0	-99	0	0	0	0	1	0	0	-9	4	-99	0	-99	-99
201502170089	2015	2	17	0	1	1	1	0	0	60	10	30.875356	31.03351	0	3	0	0	0	6	16	0	0	0	0	0	0	20	0	60	0	0	0	0	0	0	-99	0	0	0	0	0	0	0	-9	4	-99	0	-99	-99
201502170090	2015	2	17	0	1	1	1	0	0	60	10	30.848099	30.343551	0	3	0	0	0	6	28	0	0	0	0	0	0	20	0	60	0	0	0	0	0	0	-99	0	0	0	0	0	0	0	0	4	-99	0	-99	-99
201502170091	2015	2	17	0	1	1	1	0	0	60	10	28.766622	29.232079	0	3	0	0	0	6	16	0	0	0	0	0	0	14	79	60	0	0	0	0	0	0	-99	0	0	0	0	0	0	0	1	3	-99	0	-99	-99
201502170092	2015	2	17	0	1	1	1	0	0	60	10	26.558523	31.695478	0	3	0	0	0	6	17	0	0	0	0	0	0	2	14	60	0	0	0	0	0	0	-99	0	0	0	0	0	0	0	0	4	-99	0	-99	-99
201502170093	2015	2	17	0	1	1	1	0	0	60	10	31.250196	34.24128	0	3	0	0	0	6	11	0	0	0	0	0	0	14	76	60	0	0	0	0	0	0	-99	0	1	0	0	0	0	0	1	3	-99	0	-99	-99
201502170094	2015	2	17	0	1	1	1	0	0	200	10	33.443794	36.555637	0	3	0	0	0	6	16	0	0	0	0	0	0	21	106	200	0	0	0	0	0	0	-99	0	0	0	0	0	0	0	1	4	-99	0	-99	-99
201502170098	2015	2	17	0	1	1	1	0	0	60	10	31.250196	34.24128	0	2	0	0	0	5	5	0	0	0	0	0	0	3	22	60	0	0	0	0	0	0	-99	0	0	0	0	1	0	0	0	4	-99	0	-99	-99
201502170100	2015	2	17	0	1	1	0	1	0	153	6	33.695975	70.336069	0	3	0	0	0	6	16	0	0	0	0	0	0	4	29	153	0	0	0	0	0	0	-99	0	4	0	0	0	0	0	1	4	-99	0	-99	-99
201502170101	2015	2	17	0	1	1	1	0	0	153	6	29.834081	67.934619	0	3	0	0	0	6	16	0	0	0	0	0	0	19	100	153	0	0	0	0	0	0	-99	0	0	0	0	0	0	0	1	4	-99	0	-99	-99
201502170103	2015	2	17	1	1	1	0	1	0	214	9	48.364162	38.35462	1	6	0	0	0	13	0	0	0	0	0	0	0	4	29	214	0	0	0	0	0	0	-99	0	0	0	0	1	0	0	1	4	-99	1	-99	0
201502170104	2015	2	17	0	1	1	1	0	0	214	9	46.472862	30.740106	0	3	0	0	0	6	16	0	0	0	0	0	0	14	83	214	0	0	0	0	0	0	-99	0	0	0	0	0	0	0	1	3	-99	0	-99	-99
201502170107	2015	2	17	0	1	1	1	0	0	214	9	48.427444	37.835751	1	3	0	0	0	6	11	0	0	0	0	0	0	21	106	214	0	0	0	0	0	0	-99	0	0	0	0	0	0	0	1	4	-99	0	-99	-99
201502170115	2015	2	17	0	1	1	1	0	0	153	6	35.492033	72.520483	0	2	0	0	0	5	5	0	0	0	0	0	0	14	77	153	0	0	0	0	0	0	-99	0	0	0	0	0	0	0	0	4	-99	0	-99	-99
201502170119	2015	2	17	0	1	1	1	0	1	200	10	36.201721	37.14352	0	3	0	0	0	6	11	0	0	0	0	0	0	14	75	200	0	0	0	0	0	0	-99	0	2	0	0	6	0	0	-9	4	-99	0	-99	-99
201502170120	2015	2	17	0	1	1	1	0	1	200	10	36.201721	37.14352	0	3	0	0	0	6	11	0	0	0	0	0	0	14	75	200	0	0	0	0	0	0	-99	0	2	0	0	6	0	0	-9	4	-99	0	-99	-99
201502170121	2015	2	17	0	1	1	1	0	1	200	10	36.201721	37.14352	0	3	0	0	0	6	11	0	0	0	0	0	0	14	75	200	0	0	0	0	0	0	-99	0	2	0	0	6	0	0	-9	4	-99	0	-99	-99
201502170122	2015	2	17	0	1	1	1	0	1	200	10	36.201721	37.14352	0	3	0	0	0	6	11	0	0	0	0	0	0	14	75	200	0	0	0	0	0	0	-99	0	1	0	0	6	0	0	-9	4	-99	0	-99	-99
201502170123	2015	2	17	0	1	1	1	0	1	200	10	36.201721	37.14352	0	3	0	0	0	6	11	0	0	0	0	0	0	14	75	200	0	0	0	0	0	0	-99	0	1	0	0	6	0	0	-9	4	-99	0	-99	-99
201502170127	2015	2	17	0	1	1	1	0	0	217	1	28.122223	-80.689149	0	7	0	0	0	8	18	0	0	0	0	0	0	15	86	217	0	0	0	0	0	0	-99	0	0	0	0	0	0	0	1	3	5000	0	-99	-99
201502180001	2015	2	18	0	1	1	1	0	0	95	10	34.192504	43.886392	0	3	0	0	1	6	15	0	0	0	0	0	0	4	36	95	17	94	95	0	0	0	1	0	7	0	1	19	0	0	-9	4	-99	0	-99	-99
201502180008	2015	2	18	0	1	1	1	0	0	205	5	6.826315	101.235109	1	3	0	0	0	6	12	0	0	0	0	0	0	3	23	205	8	48	205	0	0	0	-99	0	0	0	0	1	0	0	1	3	-99	0	-99	-99
201502180012	2015	2	18	0	1	1	1	0	0	4	6	34.843238	69.154811	0	3	0	0	0	6	8	0	0	0	0	0	0	14	73	4	0	0	0	0	0	0	-99	0	4	0	0	1	0	0	1	3	-99	0	-99	-99
201502180017	2015	2	18	0	1	1	1	0	0	153	6	28.95	69.066667	0	3	0	0	0	6	16	0	0	0	0	0	0	21	106	153	0	0	0	0	0	0	-99	0	0	0	0	0	0	0	1	4	-99	0	-99	-99
201502180020	2015	2	18	0	1	1	1	0	0	92	6	24.798346	93.94043	1	3	0	0	0	6	12	0	0	0	0	0	0	14	74	92	0	0	0	0	0	0	-99	0	0	0	0	5	0	0	-9	4	-99	0	-99	-99
201502180023	2015	2	18	0	1	1	1	0	0	60	10	29.997915	30.963032	0	3	0	0	0	6	16	0	0	0	0	0	0	14	77	60	0	0	0	0	0	0	-99	0	1	0	0	0	0	0	-9	4	-99	0	-99	-99
201502180025	2015	2	18	0	1	1	1	0	0	95	10	33.303566	44.371773	0	3	0	0	0	6	16	0	0	0	0	0	0	14	67	95	0	0	0	0	0	0	-99	0	2	0	0	10	0	0	0	4	-99	0	-99	-99
201502180036	2015	2	18	0	1	1	1	0	1	95	10	34.176847	43.69915	0	3	0	0	1	6	13	0	0	0	0	0	0	17	94	95	0	0	0	0	0	0	-99	0	4	0	1	8	0	0	0	4	-99	0	-99	-99
201502180037	2015	2	18	0	1	1	1	0	1	95	10	34.176847	43.69915	0	3	0	0	1	6	13	0	0	0	0	0	0	17	94	95	0	0	0	0	0	0	-99	0	4	0	1	8	0	0	0	4	-99	0	-99	-99
201502180047	2015	2	18	0	1	1	1	0	0	4	6	31.631083	65.742226	0	3	0	0	1	6	13	0	0	0	0	0	0	8	49	4	0	0	0	0	0	0	1	0	2	0	1	3	0	0	-9	4	-99	0	-99	-99
201502180049	2015	2	18	0	1	1	1	0	0	92	6	25.906034	93.733909	0	2	0	0	0	6	7	5	2	0	0	0	0	2	15	92	0	0	0	0	0	0	-99	0	0	0	0	0	0	0	1	3	-99	0	-99	-99
201502180051	2015	2	18	0	1	1	1	0	0	92	6	26.128726	90.615679	0	3	0	0	0	6	16	0	0	0	0	0	0	20	0	92	0	0	0	0	0	0	-99	0	0	0	0	0	0	0	0	4	-99	0	-99	-99
201502180052	2015	2	18	0	1	1	1	0	0	19	6	22.341896	91.815117	0	3	0	0	0	6	17	0	0	0	0	0	0	20	0	19	0	0	0	0	0	0	1	1	0	0	0	1	0	1	-9	4	-99	0	-99	-99
201502180055	2015	2	18	0	1	1	1	0	0	95	10	34.881348	44.62513	0	2	0	0	0	5	5	0	0	0	0	0	0	15	85	95	14	65	95	0	0	0	-99	0	2	0	0	0	0	0	0	4	-99	0	-99	-99
201502180056	2015	2	18	0	1	1	0	1	0	214	9	48.286633	38.544113	1	3	0	0	0	6	11	0	0	0	0	0	0	4	27	214	0	0	0	0	0	0	-99	0	0	0	0	0	0	0	-9	4	-99	0	-99	-99
201502180066	2015	2	18	1	1	1	1	0	0	153	6	24.739935	69.798465	0	6	0	0	0	5	5	0	0	0	0	0	0	8	50	153	0	0	0	0	0	0	-99	0	1	0	0	0	0	0	0	4	-99	1	1	0
201502190009	2015	2	19	0	0	1	1	1	0	205	5	6.015439	101.952028	0	2	0	0	0	5	2	0	0	0	0	0	0	14	68	205	0	0	0	0	0	0	-99	0	1	0	0	1	0	0	1	3	-99	0	-99	-99
201502190012	2015	2	19	0	1	1	1	0	0	1004	11	4.855349	31.567781	0	2	0	0	0	5	2	0	0	0	0	0	0	12	62	422	0	0	0	0	0	0	1	0	1	0	0	0	0	0	0	4	-99	0	-99	-99
201502190019	2015	2	19	0	1	1	1	0	0	153	6	28.869226	68.334419	0	3	0	0	0	6	8	0	0	0	0	0	0	2	18	153	14	67	153	0	0	0	-99	0	2	0	0	2	0	0	0	4	-99	0	-99	-99
201502190020	2015	2	19	0	1	1	1	0	0	95	10	33.74324	44.623825	0	3	0	0	0	6	15	0	0	0	0	0	0	14	67	95	0	0	0	0	0	0	-99	0	1	0	0	0	0	0	1	3	-99	0	-99	-99
201502190021	2015	2	19	0	1	1	1	0	0	95	10	33.303566	44.371773	0	3	0	0	0	6	15	0	0	0	0	0	0	14	67	95	0	0	0	0	0	0	-99	0	0	0	0	1	0	0	1	3	-99	0	-99	-99
201502190022	2015	2	19	0	1	1	0	1	0	95	10	33.1	44.583333	0	3	0	0	0	6	16	0	0	0	0	0	0	4	29	95	0	0	0	0	0	0	-99	0	1	0	0	3	0	0	0	4	-99	0	-99	-99
201502190023	2015	2	19	0	1	1	1	0	0	95	10	33.247181	44.025452	0	3	0	0	0	6	16	0	0	0	0	0	0	1	7	95	0	0	0	0	0	0	-99	0	1	0	0	8	0	0	-9	4	-99	0	-99	-99
201502190024	2015	2	19	0	1	1	1	0	0	95	10	33.291944	44.065511	0	3	0	0	0	6	16	0	0	0	0	0	0	4	29	95	14	67	95	0	0	0	-99	0	0	0	0	3	0	0	0	4	-99	0	-99	-99
201502190025	2015	2	19	0	1	1	1	0	0	95	10	33.303566	44.371773	0	3	0	0	0	6	16	0	0	0	0	0	0	14	78	95	0	0	0	0	0	0	-99	0	1	0	0	8	0	0	-9	4	-99	0	-99	-99
201502190026	2015	2	19	0	1	1	1	0	0	95	10	33.100529	44.584492	1	3	0	0	0	6	16	0	0	0	0	0	0	1	2	95	0	0	0	0	0	0	-99	0	2	0	0	8	0	0	-9	4	-99	0	-99	-99
201502190029	2015	2	18	0	1	1	1	0	0	60	10	29.966834	32.549628	0	2	0	0	0	5	2	0	0	0	0	0	0	3	23	60	0	0	0	0	0	0	-99	0	1	0	0	1	0	0	1	3	-99	0	-99	-99
201502190039	2015	2	19	0	1	1	1	0	0	4	6	34.835278	70.359167	0	9	0	0	0	13	0	0	0	0	0	0	0	3	22	4	0	0	0	0	0	0	-99	0	0	0	0	6	0	3	0	4	-99	0	-99	-99
201502190042	2015	2	19	0	1	1	1	0	0	4	6	34.346722	62.197315	0	3	0	0	0	6	17	0	0	0	0	0	0	1	1	4	0	0	0	0	0	0	-99	0	0	0	0	1	0	0	-9	4	-99	0	-99	-99
201502190058	2015	2	19	0	1	1	1	0	0	19	6	23.791275	90.418205	0	3	0	0	0	6	17	0	0	0	0	0	0	22	111	19	0	0	0	0	0	0	1	1	0	0	0	1	0	1	-9	4	-99	0	-99	-99
201502190059	2015	2	19	0	1	1	1	0	0	19	6	23.791275	90.418205	0	3	0	0	0	6	17	0	0	0	0	0	0	20	0	19	0	0	0	0	0	0	-99	0	0	0	0	0	0	0	-9	4	-99	0	-99	-99
201502190060	2015	2	19	0	1	1	1	0	0	19	6	23.791275	90.418205	1	3	0	0	0	6	17	0	0	0	0	0	0	20	0	19	0	0	0	0	0	0	-99	0	0	0	0	0	0	0	-9	4	-99	0	-99	-99
201502190064	2015	2	19	0	1	1	1	0	0	19	6	24.450264	89.704052	0	3	0	0	0	6	17	0	0	0	0	0	0	19	99	19	0	0	0	0	0	0	-99	0	0	0	0	5	0	0	1	3	-99	0	-99	-99
201502190070	2015	2	19	0	1	1	1	0	0	95	10	33.303566	44.371773	0	3	0	0	0	6	11	0	0	0	0	0	0	14	72	95	0	0	0	0	0	0	-99	0	2	0	0	0	0	0	1	3	-99	0	-99	-99
201502190074	2015	2	19	0	1	1	0	1	0	214	9	47.117252	37.572659	1	3	0	0	0	6	11	0	0	0	0	0	0	4	34	214	0	0	0	0	0	0	-99	0	0	0	0	0	0	0	-9	4	-99	0	-99	-99
201502200010	2015	2	20	0	1	1	1	0	0	205	5	6.424408	101.816398	0	3	0	0	0	6	15	0	0	0	0	0	0	1	2	205	0	0	0	0	0	0	4	4	0	0	0	13	0	0	1	3	-99	0	-99	-99
201502200011	2015	2	20	0	1	1	1	0	0	205	5	6.424834	101.815028	0	3	0	0	0	6	15	0	0	0	0	0	0	3	25	205	0	0	0	0	0	0	4	4	0	0	0	0	0	0	0	4	-99	0	-99	-99
201502200012	2015	2	20	0	1	1	1	0	0	205	5	6.373608	101.812825	0	3	0	0	0	6	7	0	0	0	0	0	0	1	2	205	0	0	0	0	0	0	4	4	0	0	0	0	0	0	0	4	-99	0	-99	-99
201502200014	2015	2	20	0	1	1	0	1	0	228	10	13.696667	44.730833	0	2	0	0	0	6	11	5	2	0	0	0	0	4	27	228	0	0	0	0	0	0	-99	0	0	0	0	0	0	0	-9	4	-99	0	-99	-99
201502200015	2015	2	20	0	1	1	0	1	0	228	10	13.696667	44.730833	0	2	0	0	0	6	11	5	2	0	0	0	0	4	27	228	0	0	0	0	0	0	-99	0	0	0	0	0	0	0	-9	4	-99	0	-99	-99
201502200016	2015	2	20	0	1	1	0	1	0	228	10	13.696667	44.730833	0	2	0	0	0	6	11	5	2	0	0	0	0	4	27	228	0	0	0	0	0	0	-99	0	0	0	0	0	0	0	-9	4	-99	0	-99	-99
201502200021	2015	2	20	0	1	1	0	1	0	153	6	25.26786	63.460991	1	2	0	0	0	5	5	0	0	0	0	0	0	4	29	153	0	0	0	0	0	0	-99	0	0	0	0	6	0	4	-9	4	-99	0	-99	-99
201502200022	2015	2	20	0	1	1	1	0	0	153	6	30.200819	66.994354	0	3	0	0	0	6	7	0	0	0	0	0	0	1	12	153	0	0	0	0	0	0	-99	0	0	0	0	0	0	0	0	4	-99	0	-99	-99
201502200024	2015	2	20	0	1	1	0	1	0	95	10	33.843044	44.521936	0	3	0	0	1	6	13	0	0	0	0	0	0	4	34	95	0	0	0	0	0	0	2	0	2	0	2	0	0	0	0	4	-99	0	-99	-99
201502200026	2015	2	20	0	1	1	1	0	0	60	10	28.309792	30.708694	0	3	0	0	0	6	16	0	0	0	0	0	0	21	107	60	0	0	0	0	0	0	2	0	2	0	2	0	0	0	-9	4	-99	0	-99	-99
201502200027	2015	2	20	0	1	1	1	0	0	153	6	34.192268	72.499037	0	3	0	0	0	6	12	0	0	0	0	0	0	3	23	153	0	0	0	0	0	0	-99	0	0	0	0	0	0	0	0	4	-99	0	-99	-99
201502200028	2015	2	18	0	1	1	1	0	0	153	6	32.209583	70.387998	0	3	0	0	0	6	16	0	0	0	0	0	0	20	0	153	0	0	0	0	0	0	-99	0	0	0	0	0	0	0	0	4	-99	0	-99	-99
201502200029	2015	2	20	1	1	1	1	0	0	113	10	180	180	0	6	0	0	0	13	0	0	0	0	0	0	0	1	4	60	0	0	0	0	0	0	-99	0	0	0	0	0	0	0	0	4	-99	1	3	0
201502200030	2015	2	20	0	1	1	1	0	0	160	5	7.65129	124.824638	0	3	0	0	0	6	7	0	0	0	0	0	0	14	78	160	0	0	0	0	0	0	-99	0	0	0	0	4	0	0	-9	4	-99	0	-99	-99
201502200033	2015	2	20	0	1	1	1	0	0	19	6	23.791275	90.418205	0	3	0	0	0	6	17	0	0	0	0	0	0	14	68	19	0	0	0	0	0	0	2	0	0	0	0	5	0	0	1	3	-99	0	-99	-99
201502200087	2015	2	20	0	1	1	1	0	0	19	6	23.791275	90.418205	0	3	0	0	0	6	17	0	0	0	0	0	0	10	0	19	0	0	0	0	0	0	-99	0	0	0	0	1	0	0	-9	4	-99	0	-99	-99
201502200092	2015	2	20	0	1	1	1	0	0	155	10	31.354601	34.325991	0	3	0	0	0	6	16	0	0	0	0	0	0	8	49	155	0	0	0	0	0	0	2	2	0	0	0	0	0	0	0	4	-99	0	-99	-99
201502200094	2015	2	20	0	1	1	1	0	0	19	6	22.341896	91.815117	0	7	0	0	0	8	20	0	0	0	0	0	0	1	7	19	0	0	0	0	0	0	-99	0	0	0	0	2	0	0	1	3	-99	0	-99	-99
201502200096	2015	2	20	0	1	1	1	0	0	214	9	48.635265	38.380325	0	3	0	0	0	6	11	0	0	0	0	0	0	14	75	214	0	0	0	0	0	0	-99	0	0	0	0	0	0	0	0	4	-99	0	-99	-99
201502210001	2015	2	21	0	1	1	1	1	0	113	10	32.069286	20.151144	0	3	0	0	0	6	11	0	0	0	0	0	0	1	6	113	0	0	0	0	0	0	-99	0	0	0	0	0	0	0	1	3	-99	0	-99	-99
201502210014	2015	2	21	0	1	1	1	0	0	153	6	29.896093	69.250237	0	3	0	0	0	6	14	0	0	0	0	0	0	22	110	153	0	0	0	0	0	0	-99	0	0	0	0	0	0	0	1	3	-99	0	-99	-99
201502210015	2015	2	21	0	1	1	1	0	0	153	6	30.92211	66.45153	0	3	0	0	0	6	16	0	0	0	0	0	0	20	0	153	0	0	0	0	0	0	-99	0	0	0	0	0	0	0	0	4	-99	0	-99	-99
201502210024	2015	2	21	0	1	1	0	1	0	153	6	33.695975	70.336069	0	2	0	0	0	5	2	0	0	0	0	0	0	4	27	153	0	0	0	0	0	0	20	0	3	0	3	5	0	5	-9	4	-99	0	-99	-99
201502210026	2015	2	21	1	1	1	1	0	0	4	6	36.558688	65.810407	0	6	0	0	0	5	5	0	0	0	0	0	0	1	6	4	0	0	0	0	0	0	2	0	0	0	0	0	0	0	0	4	-99	1	1	0
201502210029	2015	2	21	0	1	1	1	0	0	95	10	180	180	0	3	0	0	1	6	15	0	0	0	0	0	0	3	22	95	0	0	0	0	0	0	1	0	1	0	1	4	0	0	-9	4	-99	0	-99	-99
201502210037	2015	2	21	0	1	1	1	0	0	60	10	29.07335	31.096894	0	3	0	0	0	6	16	0	0	0	0	0	0	3	23	60	14	73	60	0	0	0	2	0	2	0	2	2	0	0	1	3	-99	0	-99	-99
201502210042	2015	2	21	0	1	1	1	0	0	43	3	-33.366238	-70.505302	0	3	0	0	0	6	16	0	0	0	0	0	0	20	0	43	0	0	0	0	0	0	-99	0	0	0	0	0	0	0	-9	4	-99	0	-99	-99
201502210043	2015	2	21	0	1	1	1	0	0	153	6	29.306944	65.956944	0	1	0	0	0	6	12	0	0	0	0	0	0	2	14	153	0	0	0	0	0	0	-99	0	0	0	0	0	0	0	0	4	-99	0	-99	-99
201502210044	2015	2	21	0	1	1	1	0	1	153	6	28.869226	68.334419	0	3	0	0	0	6	16	0	0	0	0	0	0	21	107	153	0	0	0	0	0	0	-99	0	0	0	0	0	0	0	1	4	-99	0	-99	-99
201502210045	2015	2	21	0	1	1	1	0	1	153	6	28.869226	68.334419	0	3	0	0	0	6	16	0	0	0	0	0	0	21	107	153	0	0	0	0	0	0	-99	0	0	0	0	0	0	0	1	4	-99	0	-99	-99
201502210046	2015	2	21	0	1	1	1	0	0	153	6	34.021103	71.287421	0	2	0	0	0	5	5	0	0	0	0	0	0	14	77	153	0	0	0	0	0	0	-99	0	1	0	0	0	0	0	1	3	-99	0	-99	-99
201502210047	2015	2	21	0	1	1	1	0	0	93	5	-6.296612	107.025364	0	3	0	0	0	6	31	0	0	0	0	0	0	14	77	93	0	0	0	0	0	0	-99	0	0	0	0	0	0	0	0	4	-99	0	-99	-99
201502210048	2015	2	21	0	1	1	1	0	0	153	6	24.891115	67.143311	0	1	0	0	0	6	7	0	0	0	0	0	0	14	84	153	0	0	0	0	0	0	-99	0	0	0	0	0	0	0	0	4	-99	0	-99	-99
201502210049	2015	2	21	0	1	1	0	1	0	182	11	11.274796	49.179657	1	3	0	0	0	6	12	0	0	0	0	0	0	4	34	182	0	0	0	0	0	0	-99	0	0	0	0	0	0	0	-9	4	-99	0	-99	-99
201502210050	2015	2	21	0	1	1	1	0	1	200	10	36.201721	37.14352	0	3	0	0	0	6	11	0	0	0	0	0	0	14	75	200	0	0	0	0	0	0	-99	0	6	0	0	10	0	0	-9	4	-99	0	-99	-99
201502210052	2015	2	21	0	1	1	1	0	0	153	6	25.400806	63.453735	0	2	0	0	0	5	5	0	0	0	0	0	0	3	25	153	0	0	0	0	0	0	-99	0	0	0	0	0	0	0	1	4	-99	0	-99	-99
201502210053	2015	2	21	0	1	1	1	0	0	19	6	23.791275	90.418205	0	3	0	0	0	6	17	0	0	0	0	0	0	22	109	19	0	0	0	0	0	0	-99	0	0	0	0	1	0	0	-9	4	-99	0	-99	-99
201502210055	2015	2	21	0	1	1	1	0	0	160	5	14.07463	121.324524	0	2	0	0	0	5	3	0	0	0	0	0	0	1	11	160	0	0	0	0	0	0	-99	0	1	0	0	1	0	0	1	3	-99	0	-99	-99
201502210056	2015	2	21	0	1	1	1	0	0	92	6	25.67012	94.107633	0	1	0	0	0	6	7	0	0	0	0	0	0	2	15	92	0	0	0	0	0	0	-99	0	0	0	0	0	0	0	1	3	-99	0	-99	-99
201502210057	2015	2	20	0	1	1	1	0	0	19	6	23.791275	90.418205	0	3	0	0	0	6	17	0	0	0	0	0	0	8	49	19	0	0	0	0	0	0	-99	0	0	0	0	4	0	0	-9	4	-99	0	-99	-99
201502210091	2015	2	23	0	0	1	1	1	0	195	11	11.339859	27.002902	0	2	0	0	0	5	2	0	0	0	0	0	0	14	78	195	0	0	0	0	0	0	-99	0	3	0	0	4	0	0	0	4	-99	0	-99	-99
201502210093	2015	2	21	0	1	1	1	0	0	19	6	25.761365	89.240122	0	3	7	0	0	6	17	8	19	0	0	0	0	10	54	19	0	0	0	0	0	0	-99	0	0	0	0	0	0	0	0	4	-99	0	-99	-99
201502220010	2015	2	22	0	1	1	1	0	0	153	6	30.92211	66.45153	0	3	0	0	0	6	29	0	0	0	0	0	0	15	86	153	0	0	0	0	0	0	-99	0	1	0	0	9	0	0	1	3	-99	0	-99	-99
201502220018	2015	2	22	0	1	1	1	0	0	95	10	33.303566	44.371773	0	3	0	0	0	6	15	0	0	0	0	0	0	1	7	95	0	0	0	0	0	0	-99	0	3	0	0	6	0	0	-9	4	-99	0	-99	-99
201502220019	2015	2	22	0	1	1	1	0	0	95	10	33.07835	44.254719	0	3	0	0	0	6	16	0	0	0	0	0	0	14	74	95	0	0	0	0	0	0	-99	0	2	0	0	10	0	0	-9	4	-99	0	-99	-99
201502220020	2015	2	22	0	1	1	0	1	0	95	10	32.908383	44.263295	0	3	0	0	0	6	16	0	0	0	0	0	0	4	29	95	0	0	0	0	0	0	-99	0	0	0	0	3	0	0	0	4	-99	0	-99	-99
201502220065	2015	2	22	0	1	1	1	0	0	60	10	30.819122	30.823359	0	3	0	0	0	6	16	0	0	0	0	0	0	19	100	60	0	0	0	0	0	0	-99	0	0	0	0	0	0	0	1	4	-99	0	-99	-99
201502220066	2015	2	22	0	1	1	0	1	0	153	6	34.002579	71.382477	0	3	0	0	0	6	16	0	0	0	0	0	0	4	27	153	0	0	0	0	0	0	-99	0	0	0	0	2	0	0	0	4	-99	0	-99	-99
201502220067	2015	2	21	0	1	1	1	0	0	153	6	33.590603	71.44062	0	3	0	0	0	6	12	0	0	0	0	0	0	20	0	153	0	0	0	0	0	0	-99	0	0	0	0	0	0	0	0	4	-99	0	-99	-99
201502220069	2015	2	22	0	1	1	1	0	0	153	6	29.030739	69.162949	0	3	0	0	0	6	16	0	0	0	0	0	0	14	73	153	0	0	0	0	0	0	-99	0	0	0	0	0	0	0	0	4	-99	0	-99	-99
201502220075	2015	2	22	0	1	1	1	0	0	19	6	23.791275	90.418205	0	3	0	0	0	6	17	0	0	0	0	0	0	8	0	19	0	0	0	0	0	0	-99	0	0	0	0	1	0	0	1	3	-99	0	-99	-99
201502220078	2015	2	22	0	1	1	1	0	0	19	6	23.791275	90.418205	0	3	0	0	0	6	17	0	0	0	0	0	0	14	68	19	0	0	0	0	0	0	-99	0	0	0	0	1	0	0	-9	4	-99	0	-99	-99
201502220081	2015	2	22	0	1	1	1	0	0	153	6	33.784444	70.807222	0	2	0	0	0	5	5	0	0	0	0	0	0	17	94	153	0	0	0	0	0	0	-99	0	1	0	0	1	0	0	0	4	-99	0	-99	-99
201502220085	2015	2	22	0	1	1	0	1	0	153	6	32.987347	70.602524	0	3	0	0	0	6	7	0	0	0	0	0	0	4	29	153	0	0	0	0	0	0	-99	2	1	0	1	1	0	1	0	4	-99	0	-99	-99
201502220086	2015	2	20	0	1	1	1	0	0	19	6	23.791275	90.418205	0	3	0	0	0	6	17	0	0	0	0	0	0	14	68	19	0	0	0	0	0	0	-99	0	0	0	0	2	0	0	0	4	-99	0	-99	-99
201502220088	2015	2	22	0	1	1	1	0	0	214	9	46.472299	30.754349	0	3	0	0	0	6	28	0	0	0	0	0	0	20	0	214	0	0	0	0	0	0	-99	0	0	0	0	0	0	0	0	4	-99	0	-99	-99
201502220091	2015	2	22	0	1	1	1	0	0	95	10	34.621521	43.668377	1	3	0	0	1	6	15	0	0	0	0	0	0	17	94	95	0	0	0	0	0	0	1	0	9	0	1	15	0	0	0	4	-99	0	-99	-99
201502220092	2015	2	22	0	1	1	1	0	0	95	10	33.303566	44.371773	0	3	0	0	0	6	16	0	0	0	0	0	0	14	74	95	0	0	0	0	0	0	-99	0	2	0	0	6	0	0	-9	4	-99	0	-99	-99
201502220094	2015	2	22	0	1	1	1	0	0	19	6	23.791275	90.418205	0	3	0	0	0	6	17	0	0	0	0	0	0	22	109	19	8	49	19	0	0	0	-99	0	0	0	0	4	0	0	-9	4	-99	0	-99	-99
201502220096	2015	2	22	0	1	1	1	0	0	60	10	29.827227	31.371168	0	7	0	0	0	8	19	0	0	0	0	0	0	16	0	60	0	0	0	0	0	0	-99	0	0	0	0	0	0	0	1	4	-99	0	-99	-99
201502230003	2015	2	23	0	1	1	1	0	0	113	10	32.867867	13.189067	0	3	0	0	0	6	16	0	0	0	0	0	0	15	87	113	0	0	0	0	0	0	-99	0	0	0	0	0	0	0	1	3	-99	0	-99	-99
201502230011	2015	2	24	0	1	1	1	0	0	4	6	33.117102	69.01742	0	3	0	0	1	6	13	0	0	0	0	0	0	3	25	4	0	0	0	0	0	0	1	1	0	0	0	0	0	0	0	4	-99	0	-99	-99
201502230012	2015	2	23	0	1	1	0	1	0	113	10	27.983513	16.912251	0	2	0	0	0	5	5	0	0	0	0	0	0	4	27	113	0	0	0	0	0	0	-99	0	0	0	0	0	0	0	1	4	-99	0	-99	-99
201502230015	2015	2	23	0	1	1	1	0	0	113	10	31.197586	16.586681	0	3	0	0	0	6	16	0	0	0	0	0	0	2	21	113	0	0	0	0	0	0	-99	0	0	0	0	0	0	0	1	3	-99	0	-99	-99
201502230020	2015	2	23	0	1	1	1	0	0	95	10	33.31065	44.038208	0	3	0	0	0	6	16	0	0	0	0	0	0	17	94	95	0	0	0	0	0	0	-99	0	1	0	0	9	0	0	0	4	-99	0	-99	-99
201502230021	2015	2	23	0	1	1	1	0	0	95	10	33.057991	44.354839	0	3	0	0	0	6	16	0	0	0	0	0	0	14	74	95	0	0	0	0	0	0	-99	0	2	0	0	10	0	0	-9	4	-99	0	-99	-99
201502230058	2015	2	23	0	1	1	1	0	0	153	6	32.800575	70.49556	0	3	0	0	1	6	13	6	7	0	0	0	0	20	0	153	0	0	0	0	0	0	2	0	1	0	1	0	0	0	0	4	-99	0	-99	-99
201502230059	2015	2	23	0	1	1	1	0	0	18	10	26.222639	50.516018	0	3	0	0	0	6	17	0	0	0	0	0	0	15	86	18	0	0	0	0	0	0	1	1	0	0	0	0	0	0	1	3	-99	0	-99	-99
201502230060	2015	2	23	0	1	1	1	0	0	92	6	24.798346	93.94043	0	3	0	0	0	6	16	0	0	0	0	0	0	4	34	92	0	0	0	0	0	0	-99	0	0	0	0	0	0	0	0	4	-99	0	-99	-99
201502230061	2015	2	23	0	1	1	1	0	0	93	5	-6.392711	106.823432	0	3	0	0	0	2	30	0	0	0	0	0	0	1	7	93	0	0	0	0	0	0	-99	0	0	0	0	0	0	0	1	3	-99	0	-99	-99
201502230062	2015	2	23	0	1	1	1	0	0	138	5	23.831453	98.461755	1	2	0	0	0	5	2	5	5	0	0	0	0	3	26	138	0	0	0	0	0	0	-99	0	0	0	0	46	0	0	1	4	-99	0	-99	-99
201502230063	2015	2	23	0	1	1	1	0	0	153	6	24.891115	67.143311	0	1	0	0	0	5	5	0	0	0	0	0	0	22	109	153	0	0	0	0	0	0	-99	0	1	0	0	0	0	0	0	4	-99	0	-99	-99
201502230064	2015	2	23	0	1	1	1	0	0	182	11	2.14383	45.118061	0	3	0	0	0	6	16	0	0	0	0	0	0	4	29	182	1	2	182	0	0	0	-99	0	5	0	0	0	0	0	1	4	-99	0	-99	-99
201502230072	2015	2	23	0	1	1	1	0	0	160	5	16.517954	121.181498	0	1	0	0	0	5	5	0	0	0	0	0	0	2	14	160	0	0	0	0	0	0	-99	0	1	0	0	0	0	0	-9	4	-99	0	-99	-99
201502230074	2015	2	23	0	1	1	1	0	0	19	6	23.791275	90.418205	0	2	0	0	0	5	5	0	0	0	0	0	0	3	25	19	0	0	0	0	0	0	-99	0	1	0	1	0	0	0	-9	4	-99	0	-99	-99
201502230075	2015	2	23	0	1	1	1	0	0	19	6	23.791275	90.418205	0	3	0	0	0	6	17	0	0	0	0	0	0	22	109	19	0	0	0	0	0	0	-99	0	0	0	0	0	0	0	1	3	-99	0	-99	-99
201502230080	2015	2	23	0	1	1	1	0	0	228	10	15.325443	44.211895	0	3	0	0	0	6	16	0	0	0	0	0	0	20	0	228	0	0	0	0	0	0	-99	0	0	0	0	0	0	0	-9	4	-99	0	-99	-99
201502230085	2015	2	23	0	1	1	1	0	0	19	6	23.791275	90.418205	0	3	0	0	0	6	17	0	0	0	0	0	0	20	0	19	0	0	0	0	0	0	1	1	0	0	0	0	0	0	-9	4	-99	0	-99	-99
201502230088	2015	2	23	0	1	1	1	0	0	110	10	33.542004	35.381153	0	3	0	0	0	6	7	0	0	0	0	0	0	22	109	110	0	0	0	0	0	0	-99	0	0	0	0	0	0	0	1	3	-99	0	-99	-99
201502230090	2015	2	23	1	1	1	1	0	0	195	11	15.766197	24.904221	0	6	0	0	0	13	0	0	0	0	0	0	0	14	65	195	0	0	0	0	0	0	7	0	0	0	0	0	0	0	0	4	-99	1	1	0
201502230092	2015	2	23	0	1	1	0	1	0	160	5	13.626208	123.198491	0	2	0	0	0	5	3	0	0	0	0	0	0	4	34	160	0	0	0	0	0	0	-99	0	1	0	0	0	0	0	0	4	-99	0	-99	-99
201502240001	2015	2	24	0	1	1	1	0	1	95	10	33.303566	44.371773	0	3	0	0	1	6	13	0	0	0	0	0	0	14	67	95	0	0	0	0	0	0	-99	0	12	0	1	26	0	0	-9	4	-99	0	-99	-99
201502240009	2015	2	24	0	1	1	1	0	0	4	6	34.660214	69.240073	0	3	0	0	1	6	15	0	0	0	0	0	0	3	24	4	1	7	4	0	0	0	3	0	3	0	3	1	0	0	1	3	-99	0	-99	-99
201502240031	2015	2	24	0	1	1	1	0	0	153	6	30.92211	66.45153	0	3	0	0	0	6	14	0	0	0	0	0	0	1	8	153	0	0	0	0	0	0	-99	0	0	0	0	7	0	0	1	3	-99	0	-99	-99
201502240046	2015	2	24	0	1	1	1	0	0	153	6	25.05258	61.746845	0	3	0	0	0	6	16	0	0	0	0	0	0	14	73	153	0	0	0	0	0	0	-99	0	1	0	0	1	0	0	1	3	-99	0	-99	-99
201502240047	2015	2	24	0	1	1	1	0	0	153	6	26.102882	62.368946	0	2	0	0	0	6	11	5	5	0	0	0	0	4	36	153	15	86	153	0	0	0	-99	0	0	0	0	0	0	0	1	3	-99	0	-99	-99
201502240049	2015	2	23	0	1	1	1	0	0	4	6	34.516895	69.147011	0	1	0	0	0	5	5	0	0	0	0	0	0	2	18	4	0	0	0	0	0	0	-99	0	0	0	0	1	0	0	0	4	-99	0	-99	-99
201502240051	2015	2	24	0	1	1	1	0	0	113	10	32.867867	13.189067	0	6	0	0	0	5	5	0	0	0	0	0	0	14	83	113	0	0	0	0	0	0	-99	0	2	0	0	0	0	0	0	4	-99	1	2	0
201502240052	2015	2	24	0	1	1	1	0	0	95	10	33.303566	44.371773	0	3	0	0	0	6	15	0	0	0	0	0	0	2	18	95	0	0	0	0	0	0	-99	0	1	0	0	2	0	0	1	3	-99	0	-99	-99
201502240054	2015	2	24	0	1	1	1	0	0	95	10	33.152144	44.205237	0	3	0	0	0	6	29	0	0	0	0	0	0	3	23	95	0	0	0	0	0	0	-99	0	2	0	0	3	0	0	1	3	-99	0	-99	-99
201502240055	2015	2	24	0	1	1	1	0	0	95	10	34.726269	44.584908	1	3	0	0	0	6	16	0	0	0	0	0	0	17	94	95	0	0	0	0	0	0	-99	0	2	0	0	5	0	0	0	4	-99	0	-99	-99
201502240057	2015	2	24	0	1	1	1	0	0	95	10	33.787247	44.667145	0	1	0	0	0	6	16	0	0	0	0	0	0	2	15	95	0	0	0	0	0	0	-99	0	0	0	0	0	0	0	0	4	-99	0	-99	-99
201502240058	2015	2	24	0	1	1	1	0	0	95	10	34.881348	44.62513	0	3	0	0	0	6	15	0	0	0	0	0	0	15	86	95	0	0	0	0	0	0	-99	0	2	0	0	2	0	0	-9	4	-99	0	-99	-99
201502240066	2015	2	24	0	0	1	1	1	0	138	5	23.997579	97.901447	1	3	0	0	0	6	7	0	0	0	0	0	0	1	7	138	0	0	0	0	0	0	15	0	0	0	0	0	0	0	1	3	-99	0	-99	-99
201502240067	2015	2	24	0	1	1	1	0	0	4	6	33.335258	69.928467	0	3	0	0	0	6	17	0	0	0	0	0	0	3	23	4	14	67	4	0	0	0	-99	0	0	0	0	3	0	0	1	3	-99	0	-99	-99
201502240069	2015	2	24	0	1	1	1	0	0	153	6	34.930705	72.416938	0	3	0	0	0	6	16	0	0	0	0	0	0	20	0	153	0	0	0	0	0	0	-99	0	0	0	0	0	0	0	0	4	-99	0	-99	-99
201502240072	2015	2	24	0	1	1	1	0	0	92	6	24.851848	93.983781	1	3	0	0	0	6	16	0	0	0	0	0	0	4	34	92	0	0	0	0	0	0	-99	0	0	0	0	0	0	0	0	4	-99	0	-99	-99
201502240082	2015	2	24	0	1	1	1	0	0	19	6	23.791275	90.418205	0	3	0	0	0	6	17	0	0	0	0	0	0	20	0	19	0	0	0	0	0	0	-99	0	0	0	0	0	0	0	-9	4	-99	0	-99	-99
201502240086	2015	2	24	0	1	1	1	0	0	19	6	22.341896	91.815117	0	3	0	0	0	6	17	0	0	0	0	0	0	19	105	19	0	0	0	0	0	0	1	1	0	0	0	1	0	0	1	3	-99	0	-99	-99
201502240087	2015	2	24	0	1	1	1	0	0	19	6	25.038009	89.108648	0	3	7	0	0	6	17	8	18	12	0	0	0	19	99	19	0	0	0	0	0	0	10	0	0	0	0	4	0	0	1	3	-99	0	-99	-99
201502240088	2015	2	24	0	1	1	1	0	0	160	5	15.148368	120.618773	0	3	0	0	0	6	17	0	0	0	0	0	0	8	49	160	0	0	0	0	0	0	-99	0	0	0	0	4	0	0	1	3	-99	0	-99	-99
201502240093	2015	2	24	0	0	1	1	1	0	167	9	43.471462	46.754023	0	2	0	0	0	5	5	0	0	0	0	0	0	3	25	167	0	0	0	0	0	0	3	0	3	0	2	1	0	0	0	4	-99	0	-99	-99
201502240095	2015	2	24	0	1	1	1	0	0	92	6	19.997934	73.789937	0	3	0	0	0	6	9	0	0	0	0	0	0	1	12	92	0	0	0	0	0	0	-99	0	0	0	0	0	0	0	0	4	-99	0	-99	-99
201502240097	2015	2	24	0	1	1	1	0	0	19	6	24.278644	88.751655	0	7	0	0	0	8	18	0	0	0	0	0	0	2	21	19	0	0	0	0	0	0	-99	0	0	0	0	0	0	0	1	3	-99	0	-99	-99
201502240098	2015	2	24	0	1	1	1	0	1	95	10	33.303566	44.371773	0	3	0	0	0	6	15	0	0	0	0	0	0	14	67	95	0	0	0	0	0	0	-99	0	11	0	0	25	0	0	-9	4	-99	0	-99	-99
201502250007	2015	2	25	0	1	1	1	0	0	95	10	33.303566	44.371773	0	3	0	0	0	6	15	0	0	0	0	0	0	2	18	95	0	0	0	0	0	0	-99	0	1	0	0	3	0	0	1	3	-99	0	-99	-99
201502250008	2015	2	25	0	1	1	1	0	0	95	10	33.926586	44.772064	0	3	0	0	0	6	16	0	0	0	0	0	0	14	76	95	0	0	0	0	0	0	-99	0	1	0	0	2	0	0	0	4	-99	0	-99	-99
201502250009	2015	2	25	0	1	1	1	0	0	95	10	33.303566	44.371773	0	3	0	0	0	6	16	0	0	0	0	0	0	14	74	95	0	0	0	0	0	0	-99	0	3	0	0	7	0	0	-9	4	-99	0	-99	-99
201502250010	2015	2	25	0	1	1	1	0	0	95	10	33.375759	44.702866	0	3	0	0	0	6	16	0	0	0	0	0	0	14	74	95	0	0	0	0	0	0	-99	0	2	0	0	9	0	0	-9	4	-99	0	-99	-99
201502250011	2015	2	25	0	1	1	1	0	0	95	10	33.291944	44.065511	0	3	0	0	0	6	16	0	0	0	0	0	0	14	67	95	0	0	0	0	0	0	-99	0	0	0	0	2	0	0	0	4	-99	0	-99	-99
201502250013	2015	2	25	0	1	1	1	0	0	95	10	33.303566	44.371773	0	3	0	0	0	6	16	0	0	0	0	0	0	14	74	95	0	0	0	0	0	0	-99	0	2	0	0	6	0	0	-9	4	-99	0	-99	-99
201502250015	2015	2	25	0	1	1	1	0	0	95	10	33.509014	44.202484	0	3	0	0	0	6	11	0	0	0	0	0	0	14	75	95	0	0	0	0	0	0	-99	0	1	0	0	6	0	0	-9	4	-99	0	-99	-99
201502250019	2015	2	25	0	1	1	1	0	0	95	10	33.303566	44.371773	0	3	0	0	1	6	13	0	0	0	0	0	0	1	2	95	0	0	0	0	0	0	1	0	1	0	1	0	0	0	0	4	-99	0	-99	-99
201502250022	2015	2	25	0	1	1	0	1	0	95	10	33.07835	44.254719	0	2	0	0	0	5	5	0	0	0	0	0	0	4	34	95	0	0	0	0	0	0	-99	0	0	0	0	3	0	0	0	4	-99	0	-99	-99
201502250023	2015	2	25	0	1	1	1	0	0	95	10	33.303566	44.371773	0	3	0	0	0	6	16	0	0	0	0	0	0	14	67	95	0	0	0	0	0	0	-99	0	0	0	0	3	0	0	0	4	-99	0	-99	-99
201502250032	2015	2	25	0	1	1	1	0	0	4	6	34.227894	62.324306	0	3	0	0	1	6	13	0	0	0	0	0	0	2	21	4	0	0	0	0	0	0	2	2	0	0	0	0	0	0	0	4	-99	0	-99	-99
201502250038	2015	2	25	0	1	1	1	0	1	19	6	23.791275	90.418205	0	3	0	0	0	6	17	0	0	0	0	0	0	14	79	19	0	0	0	0	0	0	-99	0	0	0	0	0	0	0	-9	4	-99	0	-99	-99
201502250039	2015	2	25	0	1	1	1	0	1	19	6	23.791275	90.418205	0	3	0	0	0	6	17	0	0	0	0	0	0	8	49	19	0	0	0	0	0	0	1	1	0	0	0	0	0	0	-9	4	-99	0	-99	-99
201502250045	2015	2	25	0	1	1	1	0	0	92	6	11.890899	75.468764	0	3	0	0	0	6	16	0	0	0	0	0	0	14	84	92	0	0	0	0	0	0	-99	0	0	0	0	2	0	0	1	3	-99	0	-99	-99
201502250052	2015	2	25	0	1	1	1	0	0	228	10	12.825647	44.846416	0	3	0	0	0	6	16	0	0	0	0	0	0	20	0	228	0	0	0	0	0	0	-99	0	0	0	0	0	0	0	-9	4	-99	0	-99	-99
201502250053	2015	2	25	0	1	1	1	0	0	228	10	12.825647	44.846416	0	3	2	0	0	6	16	5	5	0	0	0	0	20	0	228	0	0	0	0	0	0	-99	0	0	0	0	0	0	0	-9	4	-99	0	-99	-99
201502250054	2015	2	25	0	1	1	1	0	0	60	10	31.126646	33.800865	0	3	0	0	0	6	15	0	0	0	0	0	0	4	34	60	0	0	0	0	0	0	-99	0	0	0	0	0	0	0	0	4	-99	0	-99	-99
201502250055	2015	2	25	0	1	1	1	0	0	60	10	31.250196	34.24128	0	3	0	0	0	6	15	0	0	0	0	0	0	4	34	60	0	0	0	0	0	0	-99	0	0	0	0	0	0	0	0	4	-99	0	-99	-99
201502250056	2015	2	25	0	1	1	1	0	0	60	10	31.126646	33.800865	0	3	0	0	0	6	16	0	0	0	0	0	0	20	0	60	0	0	0	0	0	0	-99	0	0	0	0	0	0	0	0	4	-99	0	-99	-99
201502250068	2015	2	25	0	1	1	1	0	0	19	6	24.448424	89.705561	0	3	0	0	0	6	17	0	0	0	0	0	0	14	67	19	0	0	0	0	0	0	-99	0	0	0	0	1	0	0	-9	4	-99	0	-99	-99
201502250069	2015	2	25	0	1	1	1	0	0	214	9	47.981647	37.762325	0	3	0	0	0	6	7	0	0	0	0	0	0	1	7	214	0	0	0	0	0	0	-99	0	1	0	0	2	0	0	1	3	-99	0	-99	-99
201502260002	2015	2	26	0	1	1	1	0	0	153	6	30.200819	66.994354	0	2	0	0	0	5	5	0	0	0	0	0	0	8	49	153	0	0	0	0	0	0	6	0	0	0	0	0	0	0	-9	4	-99	0	-99	-99
201502260008	2015	2	26	0	1	1	1	0	0	153	6	29.034412	69.158661	0	3	0	0	0	6	16	0	0	0	0	0	0	20	0	153	0	0	0	0	0	0	-99	0	0	0	0	0	0	0	0	4	-99	0	-99	-99
201502260018	2015	2	26	0	1	1	1	0	0	60	10	30.941732	31.293508	0	3	0	0	0	6	16	0	0	0	0	0	0	19	101	60	0	0	0	0	0	0	-99	0	0	0	0	0	0	0	1	3	-99	0	-99	-99
201502260020	2015	2	26	0	1	1	1	0	0	95	10	33.375759	44.702866	0	3	0	0	0	6	16	0	0	0	0	0	0	1	11	95	0	0	0	0	0	0	-99	0	2	0	0	8	0	0	-9	4	-99	0	-99	-99
201502260021	2015	2	26	0	1	1	1	0	0	95	10	33.303566	44.371773	0	3	0	0	0	6	16	0	0	0	0	0	0	1	7	95	0	0	0	0	0	0	-99	0	1	0	0	7	0	0	-9	4	-99	0	-99	-99
201502260022	2015	2	26	0	1	1	1	0	0	153	6	32.9725	70.593889	0	3	0	0	0	6	15	0	0	0	0	0	0	3	23	153	0	0	0	0	0	0	-99	0	1	0	1	7	0	0	1	3	-99	0	-99	-99
201502260031	2015	2	26	0	1	1	0	1	0	110	10	34.034916	36.227844	0	3	0	0	0	6	11	0	0	0	0	0	0	4	35	110	0	0	0	0	0	0	-99	0	0	0	0	5	0	0	1	4	-99	0	-99	-99
201502260032	2015	2	26	0	1	1	1	0	0	18	10	26.143757	50.604046	0	3	0	0	0	6	17	0	0	0	0	0	0	3	25	18	0	0	0	0	0	0	-99	0	1	0	0	1	0	0	-9	4	-99	0	-99	-99
201502260034	2015	2	26	0	1	1	1	0	1	147	11	9.933333	8.883333	0	3	0	0	0	6	16	0	0	0	0	0	0	14	79	147	0	0	0	0	0	0	-99	0	5	0	0	0	0	0	-9	4	-99	0	-99	-99
201502260035	2015	2	26	0	1	1	1	0	1	147	11	9.933333	8.883333	0	3	0	0	0	6	16	0	0	0	0	0	0	19	101	147	0	0	0	0	0	0	-99	0	12	0	0	0	0	0	-9	4	-99	0	-99	-99
201502260037	2015	2	26	0	1	1	1	0	0	153	6	34.006004	71.53743	0	1	0	0	0	6	14	0	0	0	0	0	0	22	109	153	0	0	0	0	0	0	-99	0	0	0	0	0	0	0	-9	4	-99	0	-99	-99
201502260042	2015	2	26	0	1	1	1	0	1	60	10	31.417539	31.814443	0	3	0	0	0	6	16	0	0	0	0	0	0	20	0	60	0	0	0	0	0	0	-99	0	0	0	0	0	0	0	0	4	-99	0	-99	-99
201502260043	2015	2	26	0	1	1	1	0	1	60	10	31.417539	31.814443	0	3	0	0	0	6	16	0	0	0	0	0	0	20	0	60	0	0	0	0	0	0	-99	0	0	0	0	0	0	0	0	4	-99	0	-99	-99
201502260047	2015	2	26	0	1	1	1	0	0	95	10	33.864799	42.536385	0	3	0	0	0	6	17	0	0	0	0	0	0	20	0	95	0	0	0	0	0	0	-99	0	0	0	0	0	0	0	0	4	-99	0	-99	-99
201502260048	2015	2	26	0	1	1	1	0	0	95	10	33.864799	42.536385	0	3	0	0	0	6	15	6	16	0	0	0	0	20	0	95	0	0	0	0	0	0	-99	0	0	0	0	0	0	0	0	4	-99	0	-99	-99
201502260050	2015	2	26	0	1	1	1	0	0	60	10	31.250196	34.24128	0	2	0	0	0	5	5	0	0	0	0	0	0	3	25	60	0	0	0	0	0	0	-99	0	0	0	0	1	0	0	0	4	-99	0	-99	-99
201502270011	2015	2	27	0	1	1	1	0	0	200	10	33.6432	36.690445	0	3	0	0	0	6	15	0	0	0	0	0	0	15	86	200	0	0	0	0	0	0	-99	0	11	0	0	31	0	0	-9	4	-99	0	-99	-99
201502270021	2015	2	27	0	1	1	1	0	0	182	11	2.059819	45.326115	0	3	0	0	0	6	15	0	0	0	0	0	0	4	34	182	14	67	182	0	0	0	-99	0	2	0	0	2	0	0	1	3	-99	0	-99	-99
201502270022	2015	2	27	0	1	1	1	0	0	95	10	33.737099	44.490696	0	3	0	0	0	6	16	0	0	0	0	0	0	3	23	95	0	0	0	0	0	0	-99	0	3	0	0	3	0	0	0	4	-99	0	-99	-99
201502270023	2015	2	27	0	1	1	1	0	0	95	10	33.303566	44.371773	0	3	0	0	0	6	16	0	0	0	0	0	0	14	74	95	0	0	0	0	0	0	-99	0	3	0	0	8	0	0	-9	4	-99	0	-99	-99
201502270024	2015	2	27	0	1	1	1	0	0	95	10	33.460819	44.157433	0	3	0	0	0	6	16	0	0	0	0	0	0	14	74	95	0	0	0	0	0	0	-99	0	3	0	0	4	0	0	-9	4	-99	0	-99	-99
201502270025	2015	2	27	0	1	1	1	0	0	95	10	33.303566	44.371773	0	3	0	0	0	6	16	0	0	0	0	0	0	14	74	95	0	0	0	0	0	0	-99	0	2	0	0	6	0	0	-9	4	-99	0	-99	-99
201502270026	2015	2	27	0	1	1	1	0	0	95	10	33.303566	44.371773	0	3	0	0	0	6	16	0	0	0	0	0	0	1	7	95	0	0	0	0	0	0	-99	0	1	0	0	5	0	0	-9	4	-99	0	-99	-99
201502270030	2015	2	27	0	1	1	1	0	0	95	10	34.440817	44.172027	0	3	0	0	1	6	15	0	0	0	0	0	0	19	103	95	0	0	0	0	0	0	-99	0	1	0	1	0	0	0	0	4	-99	0	-99	-99
201502270033	2015	2	27	0	1	1	1	0	0	153	6	24.891115	67.143311	0	2	0	0	0	5	5	0	0	0	0	0	0	1	6	153	0	0	0	0	0	0	2	0	2	0	0	0	0	0	0	4	-99	0	-99	-99
201502270034	2015	2	27	0	1	1	1	0	0	153	6	24.891115	67.143311	0	1	0	0	0	5	3	0	0	0	0	0	0	15	85	153	14	70	153	0	0	0	-99	0	1	0	0	1	0	0	1	3	-99	0	-99	-99
201502270038	2015	2	27	0	1	1	1	0	0	60	10	31.212225	34.117065	0	3	0	0	0	6	16	0	0	0	0	0	0	14	76	60	0	0	0	0	0	0	-99	0	0	0	0	0	0	0	1	3	-99	0	-99	-99
201502270049	2015	2	27	0	1	1	1	0	1	60	10	29.311707	30.838812	0	2	0	0	0	5	5	0	0	0	0	0	0	3	24	60	0	0	0	0	0	0	-99	0	1	0	0	1	0	0	0	4	-99	0	-99	-99
201502270050	2015	2	27	0	1	1	1	0	1	60	10	29.360998	30.68244	0	9	0	0	0	13	0	0	0	0	0	0	0	3	22	60	0	0	0	0	0	0	-99	0	0	0	0	1	0	0	0	4	-99	0	-99	-99
201502270051	2015	2	27	0	1	1	1	0	1	60	10	29.307319	30.846014	0	9	0	0	0	13	0	0	0	0	0	0	0	3	22	60	0	0	0	0	0	0	-99	0	0	0	0	0	0	0	0	4	-99	0	-99	-99
201502270052	2015	2	27	0	1	1	1	0	1	60	10	29.308363	30.842872	0	9	0	0	0	13	0	0	0	0	0	0	0	3	22	60	0	0	0	0	0	0	-99	0	0	0	0	0	0	0	0	4	-99	0	-99	-99
201502270053	2015	2	27	0	1	1	1	0	1	60	10	29.308363	30.842872	0	9	0	0	0	13	0	0	0	0	0	0	0	3	22	60	0	0	0	0	0	0	-99	0	0	0	0	0	0	0	0	4	-99	0	-99	-99
201502270054	2015	2	27	0	1	1	1	0	0	60	10	31.417539	31.814443	0	3	0	0	0	6	17	0	0	0	0	0	0	20	0	60	0	0	0	0	0	0	-99	0	0	0	0	0	0	0	1	3	-99	0	-99	-99
201502270057	2015	2	27	0	1	1	1	0	0	95	10	33.303566	44.371773	0	3	0	0	0	6	11	0	0	0	0	0	0	14	75	95	0	0	0	0	0	0	-99	0	2	0	0	4	0	0	1	3	-99	0	-99	-99
201502270058	2015	2	27	0	1	1	1	0	0	60	10	31.250196	34.24128	0	3	0	0	0	6	11	0	0	0	0	0	0	14	76	60	0	0	0	0	0	0	-99	0	1	0	0	1	0	0	1	3	-99	0	-99	-99
201502270060	2015	2	27	0	1	1	1	0	0	113	10	32.069286	20.151144	0	3	0	0	0	6	11	0	0	0	0	0	0	1	7	113	0	0	0	0	0	0	-99	0	0	0	0	0	0	0	1	3	-99	0	-99	-99
201502270063	2015	2	27	0	1	1	1	0	0	153	6	33.976307	71.437157	0	2	0	0	0	5	5	0	0	0	0	0	0	14	77	153	0	0	0	0	0	0	-99	0	1	0	0	0	0	0	0	4	-99	0	-99	-99
201502280008	2015	2	28	0	0	1	1	1	0	4	6	32.499875	67.423257	0	1	0	0	0	6	8	0	0	0	0	0	0	2	15	4	0	0	0	0	0	0	-99	0	0	0	0	2	0	0	1	3	-99	0	-99	-99
201502280009	2015	2	27	0	1	1	1	0	0	4	6	34.41808	70.649529	0	1	0	0	1	6	15	0	0	0	0	0	0	2	15	4	14	67	4	0	0	0	1	0	3	0	1	13	0	0	1	3	-99	0	-99	-99
201502280016	2015	2	28	0	1	1	0	1	0	153	6	32.275	69.511667	0	3	0	0	0	6	16	0	0	0	0	0	0	4	29	153	0	0	0	0	0	0	-99	0	0	0	0	12	0	0	1	4	-99	0	-99	-99
201502280017	2015	2	28	0	1	1	1	0	0	153	6	28.923432	69.0015	0	3	0	0	0	6	16	0	0	0	0	0	0	20	0	153	0	0	0	0	0	0	-99	0	0	0	0	0	0	0	0	4	-99	0	-99	-99
201502280022	2015	2	28	0	1	1	1	0	0	153	6	33.730833	70.977778	0	3	0	0	0	6	16	0	0	0	0	0	0	8	49	153	0	0	0	0	0	0	-99	0	0	0	0	0	0	0	1	3	-99	0	-99	-99
201502280034	2015	2	28	0	1	1	1	0	0	95	10	33.303566	44.371773	0	3	0	0	0	6	16	0	0	0	0	0	0	14	67	95	0	0	0	0	0	0	-99	0	3	0	0	8	0	0	0	4	-99	0	-99	-99
201502280035	2015	2	28	0	1	1	1	0	0	95	10	33.303566	44.371773	0	3	0	0	0	6	16	0	0	0	0	0	0	1	2	95	0	0	0	0	0	0	-99	0	2	0	0	7	0	0	-9	4	-99	0	-99	-99
201502280037	2015	2	28	0	1	1	1	0	0	95	10	33.303566	44.371773	0	3	0	0	0	6	11	0	0	0	0	0	0	14	76	95	0	0	0	0	0	0	-99	0	2	0	0	4	0	0	1	3	-99	0	-99	-99
201502280039	2015	2	28	0	1	1	1	0	0	19	6	24.176598	91.354158	0	7	0	0	0	8	19	0	0	0	0	0	0	19	100	19	0	0	0	0	0	0	-99	0	0	0	0	3	0	0	1	4	-99	0	-99	-99
201502280042	2015	2	28	0	1	1	1	0	0	153	6	34.006004	71.53743	0	3	0	0	0	6	16	0	0	0	0	0	0	20	0	153	0	0	0	0	0	0	-99	0	0	0	0	0	0	0	0	4	-99	0	-99	-99
201502280045	2015	2	28	0	1	1	1	1	0	153	6	33.671638	73.056068	0	2	0	0	0	5	5	0	0	0	0	0	0	8	49	153	0	0	0	0	0	0	-99	0	0	0	0	1	0	0	1	3	-99	0	-99	-99
201502280046	2015	2	28	0	1	1	1	0	0	19	6	23.67645	90.509489	0	3	0	0	0	6	17	0	0	0	0	0	0	14	68	19	0	0	0	0	0	0	-99	0	0	0	0	1	0	0	0	4	-99	0	-99	-99
201502280048	2015	2	28	0	1	1	0	1	0	214	9	47.098835	37.81987	0	2	0	0	0	5	5	0	0	0	0	0	0	4	34	214	0	0	0	0	0	0	-99	0	0	0	0	0	0	0	0	4	-99	0	-99	-99
201502280049	2015	2	28	0	1	1	0	1	0	214	9	48.434872	38.2705	0	2	0	0	0	5	5	0	0	0	0	0	0	4	34	214	0	0	0	0	0	0	-99	0	0	0	0	0	0	0	0	4	-99	0	-99	-99
201502280050	2015	2	28	0	1	1	0	1	0	60	10	31.250196	34.24128	0	2	0	0	0	5	5	0	0	0	0	0	0	4	36	60	0	0	0	0	0	0	-99	0	0	0	0	1	0	0	0	4	-99	0	-99	-99
201502280051	2015	2	28	0	1	1	1	0	0	153	6	24.891115	67.143311	0	6	0	0	0	13	0	0	0	0	0	0	0	14	84	153	0	0	0	0	0	0	2	2	0	0	0	0	0	0	0	4	-99	0	-99	-99
201502280053	2015	2	28	0	1	1	1	0	0	19	6	24.891471	91.872091	0	7	0	0	0	8	19	0	0	0	0	0	0	1	7	19	0	0	0	0	0	0	-99	0	0	0	0	0	0	0	1	3	-99	0	-99	-99
201502280054	2015	2	28	0	1	1	1	0	0	19	6	23.791275	90.418205	0	3	0	0	0	6	17	0	0	0	0	0	0	20	0	19	0	0	0	0	0	0	-99	0	0	0	0	0	0	0	-9	4	-99	0	-99	-99
201502280061	2015	2	28	0	1	1	1	0	0	95	10	33.303566	44.371773	0	3	0	0	0	6	16	0	0	0	0	0	0	14	67	95	0	0	0	0	0	0	-99	0	3	0	0	8	0	0	-9	4	-99	0	-99	-99
201502280062	2015	2	28	0	1	1	1	0	0	95	10	33.460819	44.157433	0	3	0	0	0	6	11	0	0	0	0	0	0	14	76	95	0	0	0	0	0	0	-99	0	3	0	0	6	0	0	1	3	-99	0	-99	-99
201502280069	2015	2	28	0	1	1	1	0	1	113	10	32.069286	20.151144	1	3	0	0	0	6	11	0	0	0	0	0	0	14	67	113	0	0	0	0	0	0	-99	0	0	0	0	13	0	0	0	4	-99	0	-99	-99
201502280074	2015	2	28	0	1	1	1	0	0	160	5	18.196832	120.598896	0	1	0	0	0	5	5	0	0	0	0	0	0	2	15	160	0	0	0	0	0	0	3	1	1	0	0	1	0	0	0	4	-99	0	-99	-99
201502280077	2015	2	28	0	1	1	1	0	0	160	5	17.576667	120.641999	0	1	0	0	0	5	5	0	0	0	0	0	0	2	15	160	0	0	0	0	0	0	-99	0	1	0	0	0	0	0	0	4	-99	0	-99	-99
201503010001	2015	3	1	0	1	1	1	0	0	205	5	6.352957	101.51344	1	2	0	0	0	5	2	0	0	0	0	0	0	3	25	205	0	0	0	0	0	0	2	0	0	0	0	1	0	0	0	4	-99	0	-99	-99
201503010002	2015	3	1	0	1	1	1	0	0	182	11	6.774396	47.429031	0	3	0	0	0	6	16	0	0	0	0	0	0	2	18	182	0	0	0	0	0	0	-99	0	1	0	0	0	0	0	1	3	-99	0	-99	-99
201503010004	2015	3	1	0	1	1	1	0	0	95	10	33.303566	44.371773	0	3	0	0	0	6	15	0	0	0	0	0	0	8	48	95	0	0	0	0	0	0	-99	0	1	0	0	1	0	0	1	3	-99	0	-99	-99
201503010005	2015	3	1	0	1	1	1	0	0	4	6	32.629449	65.452985	0	3	0	0	0	6	8	0	0	0	0	0	0	2	18	4	0	0	0	0	0	0	-99	0	2	0	0	1	0	0	1	3	-99	0	-99	-99
201503010124	2015	3	1	0	1	1	1	0	0	95	10	33.420948	43.295662	0	3	0	0	0	6	11	0	0	0	0	0	0	14	75	95	0	0	0	0	0	0	-99	0	0	0	0	0	0	0	-9	4	-99	0	-99	-99
201503010131	2015	3	1	0	1	1	1	0	0	153	6	30.92211	66.45153	0	2	0	0	0	5	5	0	0	0	0	0	0	3	23	4	0	0	0	0	0	0	6	0	2	0	0	0	0	0	1	3	-99	0	-99	-99
201503010134	2015	3	1	0	1	1	1	0	0	153	6	29.033333	69.15	0	3	0	0	0	6	16	0	0	0	0	0	0	20	0	153	0	0	0	0	0	0	-99	0	0	0	0	0	0	0	0	4	-99	0	-99	-99
201503010135	2015	3	1	0	1	1	1	0	0	92	6	24.82	93.95	0	3	0	0	0	6	7	0	0	0	0	0	0	4	34	92	14	77	92	0	0	0	-99	0	0	0	0	0	0	0	0	4	-99	0	-99	-99
201503010138	2015	3	1	0	1	1	1	0	0	153	6	25.045233	67.014439	0	3	0	0	0	6	17	0	0	0	0	0	0	8	49	153	0	0	0	0	0	0	-99	0	0	0	0	0	0	0	1	3	-99	0	-99	-99
201503010144	2015	3	1	0	1	1	1	0	0	60	10	24.088856	32.899651	0	3	0	0	0	6	16	0	0	0	0	0	0	3	22	60	21	107	60	0	0	0	-99	0	2	0	0	5	0	0	1	4	-99	0	-99	-99
201503010146	2015	3	1	0	1	1	1	0	0	19	6	23.791275	90.418205	0	3	0	0	0	6	17	0	0	0	0	0	0	8	49	19	0	0	0	0	0	0	-99	0	0	0	0	4	0	0	-9	4	-99	0	-99	-99
201503010152	2015	3	1	0	1	1	1	0	0	19	6	23.791275	90.418205	0	3	0	0	0	6	17	0	0	0	0	0	0	8	49	19	0	0	0	0	0	0	-99	0	0	0	0	0	0	0	-9	4	-99	0	-99	-99
201503010156	2015	3	1	0	1	1	1	0	0	113	10	32.203339	20.170181	0	3	0	0	0	6	11	0	0	0	0	0	0	14	75	113	4	34	113	0	0	0	-99	0	1	0	0	0	0	0	-9	4	-99	0	-99	-99
201503010165	2015	3	1	0	1	1	1	0	0	205	5	17.364697	102.815892	0	2	0	0	0	5	2	0	0	0	0	0	0	15	85	205	0	0	0	0	0	0	-99	0	1	0	0	0	0	0	0	4	-99	0	-99	-99
201503010167	2015	3	1	0	1	1	0	1	0	60	10	30.608472	33.617577	0	2	0	0	0	5	5	0	0	0	0	0	0	4	34	60	0	0	0	0	0	0	10	10	0	0	0	0	0	0	0	4	-99	0	-99	-99
201503010170	2015	3	1	0	1	1	1	0	0	19	6	23.791275	90.418205	0	3	0	0	0	6	17	0	0	0	0	0	0	14	67	19	0	0	0	0	0	0	-99	0	0	0	0	3	0	0	-9	4	-99	0	-99	-99
201503010175	2015	3	1	0	1	1	1	0	0	19	6	23.791275	90.418205	0	3	0	0	0	6	17	0	0	0	0	0	0	20	0	19	0	0	0	0	0	0	-99	0	0	0	0	0	0	0	-9	4	-99	0	-99	-99
201503010177	2015	3	1	0	1	1	1	0	0	153	6	33.720278	70.329444	0	3	0	0	0	6	16	0	0	0	0	0	0	20	0	153	0	0	0	0	0	0	-99	0	0	0	0	0	0	0	0	4	-99	0	-99	-99
201503010178	2015	3	1	0	1	1	1	0	1	153	6	24.891115	67.143311	0	2	0	0	0	5	5	0	0	0	0	0	0	22	109	153	0	0	0	0	0	0	-99	0	1	0	0	0	0	0	0	4	-99	0	-99	-99
201503010179	2015	3	1	0	1	1	1	0	1	153	6	24.891115	67.143311	0	2	0	0	0	5	5	0	0	0	0	0	0	22	109	153	0	0	0	0	0	0	-99	0	1	0	0	0	0	0	0	4	-99	0	-99	-99
201503020001	2015	3	2	0	1	1	1	0	0	95	10	33.303566	44.371773	0	3	0	0	0	6	16	0	0	0	0	0	0	19	99	95	0	0	0	0	0	0	-99	0	2	0	0	8	0	0	1	3	-99	0	-99	-99
201503020002	2015	3	2	0	1	1	1	0	0	95	10	33.303566	44.371773	0	3	0	0	0	6	16	0	0	0	0	0	0	14	74	95	0	0	0	0	0	0	-99	0	1	0	0	7	0	0	-9	4	-99	0	-99	-99
201503020003	2015	3	2	0	1	1	1	0	0	95	10	33.31065	44.038208	0	3	0	0	0	6	16	0	0	0	0	0	0	17	94	95	0	0	0	0	0	0	-99	0	1	0	0	5	0	0	-9	4	-99	0	-99	-99
201503020004	2015	3	2	0	1	1	1	0	0	95	10	33.303566	44.371773	0	3	0	0	0	6	16	0	0	0	0	0	0	1	7	95	0	0	0	0	0	0	-99	0	1	0	0	7	0	0	-9	4	-99	0	-99	-99
201503020005	2015	3	2	0	1	1	1	0	0	95	10	33.548306	44.415733	0	3	0	0	0	6	16	0	0	0	0	0	0	1	11	95	0	0	0	0	0	0	-99	0	2	0	0	5	0	0	-9	4	-99	0	-99	-99
201503020013	2015	3	2	0	1	1	1	0	0	95	10	34.2901	43.852592	0	3	0	0	0	6	16	0	0	0	0	0	0	20	0	95	0	0	0	0	0	0	-99	0	0	0	0	0	0	0	0	4	-99	0	-99	-99
201503020015	2015	3	2	0	1	1	1	0	0	95	10	34.458889	43.791004	1	3	0	0	0	6	15	0	0	0	0	0	0	20	0	95	0	0	0	0	0	0	-99	0	0	0	0	0	0	0	0	4	-99	0	-99	-99
201503020025	2015	3	2	0	1	1	1	0	0	153	6	28.633307	69.190369	1	3	0	0	0	6	16	0	0	0	0	0	0	20	0	153	0	0	0	0	0	0	-99	0	0	0	0	0	0	0	0	4	-99	0	-99	-99
201503020033	2015	3	2	0	1	1	1	0	0	95	10	34.533753	43.483738	0	3	0	0	0	6	16	0	0	0	0	0	0	20	0	95	0	0	0	0	0	0	-99	0	0	0	0	0	0	0	0	4	-99	0	-99	-99
201503020036	2015	3	2	0	1	1	1	0	0	147	11	7.986876	10.9807	0	2	7	0	0	5	5	13	0	0	0	0	0	14	75	147	0	0	0	0	0	0	-99	0	9	0	0	0	0	0	1	3	-99	0	-99	-99
201503020038	2015	3	2	0	1	1	1	0	0	147	11	10.160556	12.742243	0	3	0	0	1	6	13	0	0	0	0	0	0	15	86	147	0	0	0	0	0	0	1	0	1	0	1	0	0	0	0	4	-99	0	-99	-99
201503020053	2015	3	2	0	1	1	1	0	0	214	9	48.143208	37.753361	0	3	0	0	0	6	11	0	0	0	0	0	0	14	75	214	0	0	0	0	0	0	-99	0	0	0	0	0	0	0	0	4	-99	0	-99	-99
201503020064	2015	3	2	0	1	1	1	0	0	19	6	23.791275	90.418205	0	3	0	0	0	6	17	0	0	0	0	0	0	8	49	19	0	0	0	0	0	0	-99	0	0	0	0	0	0	0	-9	4	-99	0	-99	-99
201503020065	2015	3	2	0	1	1	1	0	0	19	6	23.791275	90.418205	0	3	0	0	0	6	17	0	0	0	0	0	0	1	3	19	0	0	0	0	0	0	-99	0	0	0	0	3	0	0	1	3	-99	0	-99	-99
201503020066	2015	3	2	0	1	1	1	0	0	19	6	23.791275	90.418205	0	3	0	0	0	6	17	0	0	0	0	0	0	14	67	19	0	0	0	0	0	0	-99	0	0	0	0	1	0	0	-9	4	-99	0	-99	-99
201503020067	2015	3	1	0	1	1	1	0	0	113	10	32.069286	20.151144	0	3	0	0	0	6	11	0	0	0	0	0	0	14	75	113	0	0	0	0	0	0	-99	0	2	0	0	31	0	0	1	3	-99	0	-99	-99
201503020072	2015	3	2	0	1	1	1	0	0	19	6	23.791275	90.418205	1	3	0	0	0	6	17	0	0	0	0	0	0	2	21	19	0	0	0	0	0	0	-99	0	0	0	0	2	0	0	-9	4	-99	0	-99	-99
201503020074	2015	3	2	0	1	1	1	0	0	19	6	25.108422	89.032041	0	3	0	0	0	6	17	0	0	0	0	0	0	1	3	19	0	0	0	0	0	0	-99	0	0	0	0	0	0	0	1	3	-99	0	-99	-99
201503020078	2015	3	2	0	1	1	1	0	0	60	10	30.608472	33.617577	0	3	0	0	0	6	16	0	0	0	0	0	0	4	29	60	0	0	0	0	0	0	-99	0	0	0	0	0	0	0	0	4	-99	0	-99	-99
201503020084	2015	3	2	0	1	1	1	0	0	19	6	23.617904	90.500743	0	3	7	0	0	6	17	8	20	0	0	0	0	19	99	19	0	0	0	0	0	0	-99	0	0	0	0	1	0	0	1	3	-99	0	-99	-99
201503020086	2015	3	2	0	1	1	1	0	0	19	6	23.791275	90.418205	0	3	0	0	0	6	17	0	0	0	0	0	0	8	49	19	0	0	0	0	0	0	-99	0	0	0	0	0	0	0	-9	4	-99	0	-99	-99
201503020093	2015	3	2	0	1	1	1	0	0	153	6	24.869619	67.244139	0	1	0	0	0	5	5	0	0	0	0	0	0	2	15	153	0	0	0	0	0	0	-99	0	2	0	0	0	0	0	1	3	-99	0	-99	-99
201503030001	2015	3	3	0	1	1	1	0	0	205	5	6.783047	101.059862	1	3	0	0	0	6	16	0	0	0	0	0	0	3	23	205	0	0	0	0	0	0	-99	0	0	0	0	0	0	0	1	3	-99	0	-99	-99
201503030003	2015	3	3	0	1	1	1	0	0	4	6	31.631083	65.742226	0	3	0	0	1	6	15	6	7	0	0	0	0	20	0	0	0	0	0	0	0	0	1	0	1	0	1	0	0	0	0	4	-99	0	-99	-99
201503030008	2015	3	3	0	1	1	1	0	0	95	10	33.74324	44.623825	0	3	0	0	0	6	16	0	0	0	0	0	0	1	7	95	0	0	0	0	0	0	-99	0	1	0	0	2	0	0	-9	4	-99	0	-99	-99
201503030025	2015	3	3	0	1	1	1	0	0	153	6	30.366667	68.6	0	1	0	0	0	5	5	0	0	0	0	0	0	3	23	153	0	0	0	0	0	0	-99	0	3	0	0	1	0	0	1	3	-99	0	-99	-99
201503030026	2015	3	3	0	1	1	1	0	0	153	6	28.54439	68.218002	0	3	0	0	0	6	29	0	0	0	0	0	0	21	107	153	0	0	0	0	0	0	-99	0	0	0	0	0	0	0	0	4	-99	0	-99	-99
201503030032	2015	3	3	0	1	1	1	0	1	205	5	6.783047	101.059862	1	2	0	0	0	5	5	0	0	0	0	0	0	1	7	205	0	0	0	0	0	0	-99	0	0	0	0	2	0	0	0	4	-99	0	-99	-99
201503030033	2015	3	3	0	1	1	1	0	1	205	5	6.751508	101.094803	1	3	0	0	0	6	15	0	0	0	0	0	0	2	18	205	3	23	205	0	0	0	-99	0	0	0	0	0	0	0	1	3	-99	0	-99	-99
201503030034	2015	3	3	0	1	1	1	0	1	205	5	6.783047	101.059862	1	3	0	0	0	6	14	0	0	0	0	0	0	3	25	205	1	6	205	13	0	205	-99	0	0	0	0	7	0	0	0	4	-99	0	-99	-99
201503030035	2015	3	3	0	1	1	1	0	0	205	5	6.325366	101.809358	1	2	0	0	0	5	5	0	0	0	0	0	0	1	9	205	0	0	0	0	0	0	2	0	1	0	0	0	0	0	0	4	-99	0	-99	-99
201503030038	2015	3	3	0	1	1	1	0	0	95	10	34.621521	43.668377	1	3	0	0	1	6	15	0	0	0	0	0	0	4	36	95	17	94	95	0	0	0	1	0	5	0	1	12	0	0	1	4	-99	0	-99	-99
201503030054	2015	3	3	0	1	1	0	1	0	214	9	47.117252	37.572659	0	3	0	0	0	6	11	0	0	0	0	0	0	4	34	214	0	0	0	0	0	0	-99	0	1	0	0	3	0	0	0	4	-99	0	-99	-99
201503030055	2015	3	3	0	1	1	0	1	0	214	9	47.981647	37.762325	0	3	0	0	0	6	11	0	0	0	0	0	0	4	34	214	0	0	0	0	0	0	-99	0	1	0	0	2	0	0	0	4	-99	0	-99	-99
201503030056	2015	3	3	0	1	1	0	1	0	214	9	48.596962	37.998299	0	3	0	0	0	6	11	0	0	0	0	0	0	4	34	214	0	0	0	0	0	0	-99	0	1	0	0	2	0	0	0	4	-99	0	-99	-99
201503030057	2015	3	3	0	1	1	0	1	0	214	9	48.916637	38.400061	0	3	0	0	0	6	11	0	0	0	0	0	0	4	34	214	0	0	0	0	0	0	-99	0	0	0	0	2	0	0	0	4	-99	0	-99	-99
201503030065	2015	3	3	0	1	1	1	0	0	137	11	-25.971414	32.58676	0	1	0	0	0	5	5	0	0	0	0	0	0	8	48	137	0	0	0	0	0	0	4	0	1	0	0	0	0	0	-9	4	-99	0	-99	-99
201503030069	2015	3	3	0	1	1	1	0	0	19	6	23.791275	90.418205	0	3	0	0	0	6	17	0	0	0	0	0	0	8	49	19	1	7	19	0	0	0	-99	0	0	0	0	1	0	0	-9	4	-99	0	-99	-99
201503030070	2015	3	3	0	1	1	1	0	0	19	6	23.791275	90.418205	0	3	0	0	0	6	17	0	0	0	0	0	0	8	49	19	0	0	0	0	0	0	-99	0	0	0	0	0	0	0	1	3	-99	0	-99	-99
201503030071	2015	3	3	0	1	1	1	0	0	45	3	3.52994	-76.29799	0	1	0	0	0	5	5	0	0	0	0	0	0	10	54	45	0	0	0	0	0	0	-99	0	1	0	0	0	0	0	0	4	-99	0	-99	-99
201503030072	2015	3	3	0	1	1	1	0	1	60	10	30.084629	31.334314	0	3	0	0	0	6	16	0	0	0	0	0	0	1	7	60	0	0	0	0	0	0	-99	0	0	0	0	0	0	0	1	3	-99	0	-99	-99
201503030073	2015	3	3	0	1	1	1	0	1	60	10	30.084629	31.334314	0	3	0	0	0	6	16	0	0	0	0	0	0	1	7	60	0	0	0	0	0	0	-99	0	0	0	0	0	0	0	1	3	-99	0	-99	-99
201503030082	2015	3	3	0	1	1	1	0	0	19	6	23.791275	90.418205	1	3	0	0	0	6	17	0	0	0	0	0	0	14	68	19	0	0	0	0	0	0	-99	0	0	0	0	1	0	0	-9	4	-99	0	-99	-99
201503040002	2015	3	4	0	1	1	0	1	0	113	10	32.069286	20.151144	0	3	0	0	1	6	15	0	0	0	0	0	0	4	27	113	0	0	0	0	0	0	1	0	1	0	1	1	0	0	-9	4	-99	0	-99	-99
201503040004	2015	3	3	0	1	1	1	0	0	113	10	32.069286	20.151144	0	3	0	0	0	6	11	0	0	0	0	0	0	4	27	113	14	67	113	0	0	0	-99	0	2	0	0	2	0	0	-9	4	-99	0	-99	-99
201503040006	2015	3	4	0	1	1	1	0	0	95	10	33.74324	44.623825	0	3	0	0	0	6	15	0	0	0	0	0	0	14	67	95	0	0	0	0	0	0	-99	0	1	0	0	0	0	0	1	3	-99	0	-99	-99
201503040007	2015	3	4	0	1	1	1	0	0	95	10	30.510054	47.778095	0	1	0	0	0	6	29	0	0	0	0	0	0	2	18	95	0	0	0	0	0	0	-99	0	0	0	0	0	0	0	-9	4	-99	0	-99	-99
201503040010	2015	3	4	0	1	1	1	0	0	200	10	36.201721	37.14352	0	3	0	0	0	6	11	0	0	0	0	0	0	14	75	200	0	0	0	0	0	0	-99	0	6	0	0	0	0	0	0	4	-99	0	-99	-99
201503040020	2015	3	4	0	1	1	0	1	0	113	10	32.867867	13.189067	0	3	0	0	0	6	11	0	0	0	0	0	0	4	31	113	0	0	0	0	0	0	-99	0	0	0	0	0	0	0	0	4	-99	0	-99	-99
201503040023	2015	3	4	0	1	1	1	0	0	95	10	34.458889	43.791004	0	1	0	0	1	6	15	0	0	0	0	0	0	17	93	95	0	0	0	0	0	0	-99	0	6	0	1	0	0	0	1	4	-99	0	-99	-99
201503040030	2015	3	4	0	1	1	1	0	0	153	6	24.891115	67.143311	0	1	0	0	0	5	3	0	0	0	0	0	0	15	87	153	0	0	0	0	0	0	-99	0	2	0	0	0	0	0	1	3	-99	0	-99	-99
201503040032	2015	3	4	0	1	1	1	0	0	153	6	24.891115	67.143311	0	1	0	0	0	5	3	0	0	0	0	0	0	1	112	153	0	0	0	0	0	0	-99	0	1	0	0	0	0	0	1	3	-99	0	-99	-99
201503040033	2015	3	4	0	1	1	1	0	0	153	6	28.95	69.066667	0	3	0	0	0	6	16	0	0	0	0	0	0	21	106	153	0	0	0	0	0	0	-99	0	0	0	0	0	0	0	1	4	-99	0	-99	-99
201503040034	2015	3	4	0	1	1	1	0	0	19	6	23.791275	90.418205	0	3	0	0	0	6	17	0	0	0	0	0	0	22	111	19	0	0	0	0	0	0	-99	0	0	0	0	4	0	0	-9	4	-99	0	-99	-99
201503040036	2015	3	4	0	1	1	1	0	0	153	6	31.201797	73.170047	1	2	0	0	0	5	5	0	0	0	0	0	0	8	48	153	0	0	0	0	0	0	-99	0	1	0	0	0	0	0	1	3	-99	0	-99	-99
201503040037	2015	3	4	0	1	1	1	0	0	167	9	42.05	48.3	0	1	0	0	0	5	3	0	0	0	0	0	0	2	15	167	0	0	0	0	0	0	-99	0	1	0	0	0	0	0	0	4	-99	0	-99	-99
201503040038	2015	3	4	0	1	1	1	0	0	60	10	31.16983	34.087421	0	3	0	0	0	6	16	0	0	0	0	0	0	4	34	60	0	0	0	0	0	0	-99	0	0	0	0	0	0	0	0	4	-99	0	-99	-99
201503040041	2015	3	4	0	1	1	1	0	0	19	6	22.94456	90.837466	0	7	0	0	0	8	18	0	0	0	0	0	0	2	21	19	0	0	0	0	0	0	-99	0	0	0	0	0	0	0	1	3	-99	0	-99	-99
201503040052	2015	3	4	0	1	1	1	0	0	153	6	24.891115	67.143311	0	2	0	0	0	5	5	0	0	0	0	0	0	7	45	173	0	0	0	0	0	0	-99	0	0	0	0	0	0	0	1	3	-99	0	-99	-99
201503050002	2015	3	5	0	1	1	1	0	0	95	10	33.303566	44.371773	0	3	0	0	0	6	15	0	0	0	0	0	0	14	67	95	0	0	0	0	0	0	-99	0	1	0	0	0	0	0	1	3	-99	0	-99	-99
201503050003	2015	3	5	0	1	1	1	0	0	95	10	33.057991	44.354839	0	3	0	0	0	6	16	0	0	0	0	0	0	1	7	95	0	0	0	0	0	0	-99	0	1	0	0	9	0	0	-9	4	-99	0	-99	-99
201503050004	2015	3	5	0	1	1	0	1	0	95	10	33.53865	44.351657	0	3	0	0	0	6	16	0	0	0	0	0	0	4	29	95	0	0	0	0	0	0	-99	0	2	0	0	1	0	0	-9	4	-99	0	-99	-99
201503050005	2015	3	5	0	1	1	1	0	0	95	10	33.375759	44.702866	0	3	0	0	0	6	16	0	0	0	0	0	0	14	74	95	0	0	0	0	0	0	-99	0	3	0	0	7	0	0	1	3	-99	0	-99	-99
201503050006	2015	3	5	0	1	1	1	0	0	95	10	33.303566	44.371773	0	3	0	0	0	6	16	0	0	0	0	0	0	1	7	95	0	0	0	0	0	0	-99	0	2	0	0	8	0	0	-9	4	-99	0	-99	-99
201503050007	2015	3	5	0	1	1	1	0	0	95	10	33.303566	44.371773	0	3	0	0	0	6	11	0	0	0	0	0	0	14	75	95	0	0	0	0	0	0	-99	0	1	0	0	6	0	0	-9	4	-99	0	-99	-99
201503050018	2015	3	4	0	1	1	0	1	0	153	6	28.633307	69.190369	0	3	0	0	0	6	11	0	0	0	0	0	0	4	27	153	0	0	0	0	0	0	-99	0	0	0	0	0	0	0	0	4	-99	0	-99	-99
201503050021	2015	3	5	0	1	1	1	0	0	228	10	14.54397	49.12458	0	2	0	0	0	5	5	0	0	0	0	0	0	4	29	228	14	67	228	0	0	0	-99	0	0	0	0	1	0	0	0	4	-99	0	-99	-99
201503050027	2015	3	5	0	1	1	1	0	0	113	10	32.069286	20.151144	0	3	0	0	0	6	11	0	0	0	0	0	0	14	75	113	0	0	0	0	0	0	-99	0	1	0	0	3	0	0	-9	4	-99	0	-99	-99
201503050034	2015	3	5	0	1	1	1	0	0	214	9	46.487384	30.726471	0	3	0	0	0	6	16	0	0	0	0	0	0	22	110	214	0	0	0	0	0	0	-99	0	0	0	0	0	0	0	1	3	-99	0	-99	-99
201503050035	2015	3	5	0	1	1	1	0	0	214	9	48.736645	39.226654	0	3	0	0	0	6	11	0	0	0	0	0	0	14	75	214	0	0	0	0	0	0	-99	0	0	0	0	0	0	0	0	4	-99	0	-99	-99
201503050036	2015	3	5	0	1	1	1	0	0	214	9	48.750614	38.787846	1	2	0	0	0	5	5	0	0	0	0	0	0	14	75	214	0	0	0	0	0	0	-99	0	0	0	0	0	0	0	0	4	-99	0	-99	-99
201503050048	2015	3	5	0	0	1	1	1	0	121	5	3.073246	101.518424	0	8	0	0	0	9	22	0	0	0	0	0	0	14	84	121	0	0	0	0	0	0	2	0	0	0	0	1	0	0	0	4	-99	0	-99	-99
201503050050	2015	3	5	0	1	1	1	0	0	184	4	37.572525	126.975643	0	1	0	0	0	9	23	0	0	0	0	0	0	7	45	217	0	0	0	0	0	0	1	1	0	0	0	1	1	0	0	4	-99	0	-99	-99
201503050052	2015	3	5	0	1	1	1	0	0	19	6	23.791275	90.418205	0	3	0	0	0	6	17	0	0	0	0	0	0	8	49	19	0	0	0	0	0	0	-99	0	0	0	0	0	0	0	-9	4	-99	0	-99	-99
201503050056	2015	3	5	0	1	1	1	0	0	182	11	2.059819	45.326115	0	3	0	0	0	6	15	0	0	0	0	0	0	3	25	182	0	0	0	0	0	0	-99	0	0	0	0	0	0	0	0	4	-99	0	-99	-99
201503050057	2015	3	5	0	1	1	1	0	0	60	10	31.172222	34.196667	0	3	0	0	0	6	11	0	0	0	0	0	0	14	76	60	0	0	0	0	0	0	-99	0	2	0	0	3	0	0	1	3	-99	0	-99	-99
201503050058	2015	3	5	0	1	1	1	0	0	53	8	34.771839	32.431502	0	3	0	0	0	6	17	0	0	0	0	0	0	14	79	53	0	0	0	0	0	0	1	1	0	0	0	0	0	0	0	4	-99	0	-99	-99
201503050073	2015	3	5	0	1	1	1	0	0	203	11	-1.475856	31.74281	0	7	0	0	0	8	18	0	0	0	0	0	0	15	86	203	0	0	0	0	0	0	-99	0	0	0	0	0	0	0	1	3	-99	0	-99	-99
201503060003	2015	3	6	0	1	1	1	0	0	95	10	33.303566	44.371773	0	3	0	0	0	6	16	0	0	0	0	0	0	1	7	95	0	0	0	0	0	0	-99	0	1	0	0	6	0	0	-9	4	-99	0	-99	-99
201503060004	2015	3	6	0	1	1	1	0	0	95	10	34.599706	43.68369	0	3	0	0	0	6	16	0	0	0	0	0	0	20	0	95	0	0	0	0	0	0	-99	0	2	0	0	0	0	0	0	4	-99	0	-99	-99
201503060005	2015	3	6	0	1	1	1	0	0	95	10	33.303566	44.371773	0	3	0	0	0	6	16	0	0	0	0	0	0	1	7	95	0	0	0	0	0	0	-99	0	2	0	0	7	0	0	-9	4	-99	0	-99	-99
201503060006	2015	3	6	0	1	1	1	0	0	95	10	33.303566	44.371773	0	3	0	0	0	6	16	0	0	0	0	0	0	1	2	95	0	0	0	0	0	0	-99	0	1	0	0	11	0	0	-9	4	-99	0	-99	-99
201503060008	2015	3	6	0	1	1	1	0	1	95	10	33.303566	44.371773	0	3	0	0	0	6	11	0	0	0	0	0	0	14	75	95	0	0	0	0	0	0	-99	0	1	0	0	4	0	0	-9	4	-99	0	-99	-99
201503060009	2015	3	6	0	1	1	1	0	1	95	10	33.460819	44.157433	0	3	0	0	0	6	11	0	0	0	0	0	0	14	75	95	0	0	0	0	0	0	-99	0	0	0	0	4	0	0	-9	4	-99	0	-99	-99
201503060040	2015	3	6	0	1	1	1	0	0	214	9	49.993705	36.230525	0	1	0	0	0	6	29	6	8	0	0	0	0	3	25	214	0	0	0	0	0	0	-99	0	0	0	0	2	0	0	1	3	-99	0	-99	-99
201503060044	2015	3	6	0	1	1	1	0	0	160	5	14.599352	120.984772	0	1	0	0	0	5	5	0	0	0	0	0	0	2	15	160	0	0	0	0	0	0	-99	0	1	0	0	0	0	0	0	4	-99	0	-99	-99
201503060045	2015	3	6	0	1	1	0	1	0	160	5	6.956804	124.242556	0	3	0	0	0	6	11	0	0	0	0	0	0	4	35	160	0	0	0	0	0	0	-99	0	0	0	0	1	0	0	1	4	-99	0	-99	-99
201503060046	2015	3	6	0	1	1	0	1	0	160	5	6.926251	124.414984	0	3	0	0	0	6	16	0	0	0	0	0	0	4	35	160	0	0	0	0	0	0	-99	0	0	0	0	2	0	0	1	3	-99	0	-99	-99
201503060047	2015	3	6	0	1	1	0	1	0	160	5	6.926251	124.414984	0	2	0	0	0	5	4	0	0	0	0	0	0	4	31	160	0	0	0	0	0	0	-99	0	0	0	0	1	0	0	1	4	-99	0	-99	-99
201503060048	2015	3	6	0	1	1	1	0	1	19	6	23.171652	89.212055	0	3	0	0	0	6	17	0	0	0	0	0	0	22	109	19	0	0	0	0	0	0	5	0	0	0	0	0	0	0	1	3	-99	0	-99	-99
201503060049	2015	3	6	0	1	1	1	0	1	19	6	23.165488	89.208917	0	3	0	0	0	6	17	0	0	0	0	0	0	22	109	19	0	0	0	0	0	0	-99	0	0	0	0	0	0	0	1	3	-99	0	-99	-99
201503060050	2015	3	6	0	1	1	1	0	1	19	6	23.165488	89.208917	0	3	0	0	0	6	17	0	0	0	0	0	0	22	109	19	0	0	0	0	0	0	-99	0	0	0	0	0	0	0	1	3	-99	0	-99	-99
201503060051	2015	3	6	0	1	1	1	0	1	19	6	23.165488	89.208917	0	3	0	0	0	6	17	0	0	0	0	0	0	22	109	19	0	0	0	0	0	0	-99	0	0	0	0	0	0	0	1	3	-99	0	-99	-99
201503060052	2015	3	6	0	1	1	1	0	1	19	6	23.165488	89.208917	0	3	0	0	0	6	17	0	0	0	0	0	0	22	109	19	0	0	0	0	0	0	-99	0	0	0	0	0	0	0	1	3	-99	0	-99	-99
201503060053	2015	3	6	0	1	1	1	0	1	19	6	23.165488	89.208917	0	3	0	0	0	6	17	0	0	0	0	0	0	22	109	19	0	0	0	0	0	0	-99	0	0	0	0	0	0	0	1	3	-99	0	-99	-99
201503060062	2015	3	6	0	1	1	1	0	0	19	6	22.94456	90.837466	0	5	7	0	0	5	5	8	18	0	0	0	0	2	21	19	0	0	0	0	0	0	-99	0	0	0	0	0	0	0	1	3	-99	1	-99	0
201503070001	2015	3	7	0	1	1	1	0	1	95	10	34.881348	44.62513	0	3	0	0	0	6	15	0	0	0	0	0	0	14	67	95	0	0	0	0	0	0	-99	0	5	0	0	25	0	0	-9	4	-99	0	-99	-99
201503070002	2015	3	7	0	1	1	1	0	0	95	10	33.303566	44.371773	0	3	0	0	1	6	15	0	0	0	0	0	0	4	36	95	14	67	95	0	0	0	1	0	4	0	1	11	0	0	1	3	-99	0	-99	-99
201503070003	2015	3	7	0	1	1	1	0	0	95	10	33.303566	44.371773	0	3	0	0	0	6	16	0	0	0	0	0	0	1	7	95	0	0	0	0	0	0	-99	0	2	0	0	8	0	0	-9	4	-99	0	-99	-99
201503070005	2015	3	7	0	1	1	1	0	0	95	10	33.303566	44.371773	0	6	0	0	0	5	5	0	0	0	0	0	0	14	77	95	0	0	0	0	0	0	30	0	0	0	0	0	0	0	0	4	-99	1	21	0
201503070006	2015	3	7	0	1	1	1	0	0	4	6	34.516895	69.147011	0	2	0	0	0	5	3	0	0	0	0	0	0	15	86	4	0	0	0	0	0	0	2	0	5	0	0	6	0	0	0	4	-99	0	-99	-99
201503070011	2015	3	7	0	1	1	1	0	0	60	10	30.968777	31.170673	0	3	0	0	0	6	16	0	0	0	0	0	0	1	3	60	0	0	0	0	0	0	-99	0	2	0	0	16	0	0	-9	4	-99	0	-99	-99
201503070013	2015	3	7	0	1	1	1	0	0	60	10	30.787678	30.999529	0	3	0	0	0	6	16	0	0	0	0	0	0	19	100	60	0	0	0	0	0	0	-99	0	0	0	0	0	0	0	1	4	-99	0	-99	-99
201503070025	2015	3	7	0	1	1	1	0	0	95	10	33.303566	44.371773	0	3	0	0	0	6	11	0	0	0	0	0	0	14	76	95	0	0	0	0	0	0	-99	0	1	0	0	6	0	0	1	3	-99	0	-99	-99
201503070026	2015	3	7	0	1	1	1	0	0	95	10	33.303566	44.371773	0	3	0	0	0	6	16	0	0	0	0	0	0	14	74	95	0	0	0	0	0	0	-99	0	1	0	0	5	0	0	-9	4	-99	0	-99	-99
201503070027	2015	3	7	0	1	1	1	0	0	95	10	33.303566	44.371773	0	3	0	0	0	6	11	0	0	0	0	0	0	3	24	95	0	0	0	0	0	0	-99	0	0	0	0	3	0	0	0	4	-99	0	-99	-99
201503070028	2015	3	7	0	1	1	0	1	0	95	10	33.31065	44.038208	0	3	0	0	0	6	16	0	0	0	0	0	0	4	29	95	0	0	0	0	0	0	-99	0	2	0	0	6	0	0	0	4	-99	0	-99	-99
201503070029	2015	3	7	0	1	1	1	0	0	95	10	33.303566	44.371773	0	3	0	0	0	6	16	0	0	0	0	0	0	14	67	95	0	0	0	0	0	0	-99	0	0	0	0	2	0	0	0	4	-99	0	-99	-99
201503070030	2015	3	7	0	1	1	1	0	1	95	10	34.881348	44.62513	0	3	0	0	1	6	13	0	0	0	0	0	0	14	67	95	0	0	0	0	0	0	-99	0	4	0	1	7	0	0	-9	4	-99	0	-99	-99
201503070031	2015	3	7	0	1	1	1	0	0	95	10	33.573486	44.547424	0	3	0	0	0	6	15	0	0	0	0	0	0	1	11	95	0	0	0	0	0	0	-99	0	2	0	0	0	0	0	0	4	-99	0	-99	-99
201503070037	2015	3	7	0	1	1	1	0	0	19	6	23.791275	90.418205	0	3	0	0	0	6	17	0	0	0	0	0	0	22	111	19	0	0	0	0	0	0	3	3	0	0	0	13	0	0	0	4	-99	0	-99	-99
201503070038	2015	3	7	0	1	1	1	0	0	19	6	23.791275	90.418205	0	3	0	0	0	6	17	0	0	0	0	0	0	14	74	19	0	0	0	0	0	0	-99	0	0	0	0	2	0	0	-9	4	-99	0	-99	-99
201503070039	2015	3	7	0	1	1	1	0	0	19	6	23.791275	90.418205	0	1	0	0	0	6	17	0	0	0	0	0	0	2	17	19	0	0	0	0	0	0	-99	0	0	0	0	1	0	0	0	4	-99	0	-99	-99
201503070040	2015	3	7	0	1	1	1	0	0	19	6	23.791275	90.418205	1	3	0	0	0	6	17	0	0	0	0	0	0	14	77	19	0	0	0	0	0	0	-99	0	0	0	0	1	0	0	-9	4	-99	0	-99	-99
201503070041	2015	3	7	0	1	1	1	0	0	19	6	23.791275	90.418205	0	3	0	0	0	6	17	0	0	0	0	0	0	19	105	19	14	80	19	0	0	0	-99	0	0	0	0	1	0	0	-9	4	-99	0	-99	-99
201503070042	2015	3	7	0	1	1	1	0	0	92	6	26.98	94.63	0	2	0	0	0	5	5	0	0	0	0	0	0	3	23	92	0	0	0	0	0	0	-99	0	0	0	0	0	0	0	0	4	-99	0	-99	-99
201503070052	2015	3	7	0	0	1	1	1	0	92	6	25.435841	81.846244	0	3	0	0	0	6	17	0	0	0	0	0	0	2	18	92	0	0	0	0	0	0	-99	0	1	0	0	0	0	0	-9	4	-99	0	-99	-99
201503070053	2015	3	7	0	1	1	1	0	0	19	6	22.341896	91.815117	0	3	7	0	0	6	17	8	18	0	0	0	0	19	100	19	8	0	19	0	0	0	-99	0	0	0	0	1	0	0	1	3	-99	0	-99	-99
201503070055	2015	3	7	0	1	1	1	0	0	19	6	23.56	90.291389	0	7	0	0	0	8	18	0	0	0	0	0	0	2	21	19	0	0	0	0	0	0	-99	0	0	0	0	0	0	0	1	3	-99	0	-99	-99
201503070057	2015	3	7	1	1	1	1	0	0	113	10	32.867867	13.189067	0	6	0	0	0	13	0	0	0	0	0	0	0	2	14	113	0	0	0	0	0	0	-99	0	0	0	0	0	0	0	0	4	-99	1	1	0
201503070058	2015	3	7	0	1	1	1	0	0	60	10	31.212225	34.117065	0	3	0	0	0	6	16	0	0	0	0	0	0	14	67	60	0	0	0	0	0	0	-99	0	0	0	0	1	0	0	0	4	-99	0	-99	-99
201503070059	2015	3	7	0	1	1	0	1	0	60	10	31.250196	34.24128	0	3	2	0	0	6	16	5	5	0	0	0	0	4	29	60	0	0	0	0	0	0	-99	0	0	0	0	0	0	0	0	4	-99	0	-99	-99
201503070061	2015	3	7	0	1	1	1	0	0	19	6	24.197485	88.837103	0	7	0	0	0	8	20	0	0	0	0	0	0	16	90	19	0	0	0	0	0	0	-99	0	0	0	0	0	0	0	1	3	-99	0	-99	-99
201503070073	2015	3	7	0	1	1	0	1	0	4	6	32.072055	64.836484	0	3	0	0	0	6	8	0	0	0	0	0	0	4	35	4	0	0	0	0	0	0	-99	0	1	0	0	3	0	0	1	4	-99	0	-99	-99
201503080011	2015	3	8	0	1	1	1	0	0	182	11	6.774396	47.429031	0	3	0	0	0	6	16	0	0	0	0	0	0	1	2	182	0	0	0	0	0	0	2	2	0	0	0	0	0	0	0	4	-99	0	-99	-99
201503080018	2015	3	8	0	1	1	1	0	0	160	5	7.609691	125.113125	0	3	2	0	0	6	8	5	5	0	0	0	0	3	23	160	0	0	0	0	0	0	-99	0	0	0	0	0	0	0	1	3	-99	0	-99	-99
201503080031	2015	3	8	0	1	1	1	0	0	205	5	6.352957	101.51344	0	3	0	0	0	6	15	0	0	0	0	0	0	19	100	205	0	0	0	0	0	0	2	0	0	0	0	9	0	0	1	3	-99	0	-99	-99
201503080032	2015	3	7	0	1	1	1	0	0	229	11	-2.621389	28.669444	0	2	0	0	0	5	5	0	0	0	0	0	0	1	10	229	0	0	0	0	0	0	-99	0	12	0	0	0	0	0	0	4	-99	0	-99	-99
201503080033	2015	3	8	0	1	1	1	0	0	4	6	34.516895	69.147011	0	3	0	0	0	6	16	0	0	0	0	0	0	20	0	0	0	0	0	0	0	0	-99	0	0	0	0	0	0	0	1	3	-99	0	-99	-99
201503080040	2015	3	8	0	1	1	1	0	0	95	10	33.303566	44.371773	0	3	0	0	0	6	16	0	0	0	0	0	0	14	74	95	0	0	0	0	0	0	-99	0	3	0	0	0	0	0	-9	4	-99	0	-99	-99
201503080041	2015	3	8	0	1	1	1	0	0	95	10	33.548306	44.415733	0	3	0	0	0	6	16	0	0	0	0	0	0	1	2	95	0	0	0	0	0	0	-99	0	3	0	0	0	0	0	-9	4	-99	0	-99	-99
201503080042	2015	3	8	0	1	1	1	0	0	95	10	33.057991	44.354839	0	3	0	0	0	6	15	0	0	0	0	0	0	14	79	95	0	0	0	0	0	0	-99	0	3	0	0	15	0	0	-9	4	-99	0	-99	-99
201503080043	2015	3	8	0	1	1	0	1	0	95	10	34.208416	43.890713	1	3	0	0	0	6	16	0	0	0	0	0	0	4	29	95	0	0	0	0	0	0	-99	0	8	0	0	31	0	0	1	4	-99	0	-99	-99
201503080044	2015	3	8	0	1	1	1	0	0	95	10	34.365089	43.74522	0	3	0	0	1	6	13	0	0	0	0	0	0	17	94	95	0	0	0	0	0	0	1	0	1	0	1	0	0	0	0	4	-99	0	-99	-99
201503080053	2015	3	8	0	1	1	1	0	0	92	6	24.798346	93.94043	0	3	0	0	0	6	7	0	0	0	0	0	0	8	49	92	0	0	0	0	0	0	-99	0	0	0	0	0	0	0	-9	4	-99	0	-99	-99
201503080054	2015	3	8	0	1	1	1	0	0	92	6	24.798346	93.94043	0	3	0	0	0	6	16	0	0	0	0	0	0	14	76	92	0	0	0	0	0	0	-99	0	0	0	0	0	0	0	0	4	-99	0	-99	-99
201503080056	2015	3	8	0	1	1	1	0	0	19	6	23.791275	90.418205	0	3	0	0	0	6	17	0	0	0	0	0	0	14	73	19	0	0	0	0	0	0	1	1	0	0	0	1	0	1	0	4	-99	0	-99	-99
201503080057	2015	3	8	0	1	1	1	0	0	19	6	23.791275	90.418205	0	3	0	0	0	6	17	0	0	0	0	0	0	14	77	19	0	0	0	0	0	0	-99	0	0	0	0	1	0	0	0	4	-99	0	-99	-99
201503080058	2015	3	8	0	1	1	1	0	0	92	6	26.538662	90.693912	0	3	0	0	0	6	16	0	0	0	0	0	0	20	0	92	0	0	0	0	0	0	-99	0	0	0	0	0	0	0	0	4	-99	0	-99	-99
201503080060	2015	3	8	1	1	1	1	0	0	4	6	35.314054	70.866719	0	6	0	0	0	13	0	0	0	0	0	0	0	14	67	4	0	0	0	0	0	0	-99	0	3	0	0	0	0	0	0	4	-99	1	3	0
201503080064	2015	3	8	0	1	1	1	0	0	19	6	22.666389	90.663056	0	3	0	0	0	6	17	0	0	0	0	0	0	14	68	19	0	0	0	0	0	0	-99	0	0	0	0	3	0	0	0	4	-99	0	-99	-99
201503080076	2015	3	8	0	1	1	1	0	0	53	8	34.771839	32.431502	0	3	0	0	0	6	17	0	0	0	0	0	0	14	79	53	0	0	0	0	0	0	1	1	0	0	0	0	0	0	-9	4	-99	0	-99	-99
201503080077	2015	3	8	0	1	1	1	0	0	19	6	25.188565	89.472407	0	3	0	0	0	6	17	0	0	0	0	0	0	8	49	19	0	0	0	0	0	0	-99	0	0	0	0	0	0	0	0	4	-99	0	-99	-99
201503080079	2015	3	8	0	1	1	1	0	0	19	6	24.44001	90.19957	0	3	7	0	0	6	17	8	19	0	0	0	0	20	0	19	0	0	0	0	0	0	-99	0	0	0	0	0	0	0	0	4	-99	0	-99	-99
201503080082	2015	3	8	0	1	1	1	0	0	60	10	30.968777	31.170673	0	3	0	0	0	6	16	0	0	0	0	0	0	20	0	60	0	0	0	0	0	0	-99	0	0	0	0	0	0	0	0	4	-99	0	-99	-99
201503080083	2015	3	8	0	1	1	1	0	0	60	10	30.014193	31.287932	0	3	0	0	0	6	16	0	0	0	0	0	0	20	0	60	0	0	0	0	0	0	-99	0	0	0	0	0	0	0	0	4	-99	0	-99	-99
201503090001	2015	3	9	0	1	1	1	0	0	95	10	32.982933	44.361595	0	3	0	0	0	6	16	0	0	0	0	0	0	14	74	95	0	0	0	0	0	0	-99	0	2	0	0	9	0	0	-9	4	-99	0	-99	-99
201503090002	2015	3	9	0	1	1	1	0	0	95	10	33.512032	44.217289	0	3	0	0	0	6	16	0	0	0	0	0	0	1	7	95	0	0	0	0	0	0	-99	0	3	0	0	6	0	0	-9	4	-99	0	-99	-99
201503090003	2015	3	9	0	1	1	1	0	0	95	10	33.303566	44.371773	0	3	0	0	0	6	16	0	0	0	0	0	0	3	23	95	0	0	0	0	0	0	-99	0	1	0	0	4	0	0	0	4	-99	0	-99	-99
201503090004	2015	3	9	0	1	1	1	0	0	95	10	33.303566	44.371773	0	3	0	0	0	6	16	0	0	0	0	0	0	1	2	95	0	0	0	0	0	0	-99	0	1	0	0	7	0	0	-9	4	-99	0	-99	-99
201503090005	2015	3	9	0	1	1	1	0	0	95	10	33.100529	44.584492	0	3	0	0	0	6	16	0	0	0	0	0	0	1	11	95	0	0	0	0	0	0	-99	0	2	0	0	9	0	0	-9	4	-99	0	-99	-99
201503090008	2015	3	9	0	1	1	1	0	1	113	10	32.069286	20.151144	0	3	0	0	0	6	11	0	0	0	0	0	0	4	34	113	14	75	113	0	0	0	-99	0	1	0	0	3	0	0	0	4	-99	0	-99	-99
201503090009	2015	3	10	0	1	1	1	0	1	4	6	32.482463	62.031097	0	3	0	0	0	6	8	0	0	0	0	0	0	14	67	4	0	0	0	0	0	0	-99	0	1	0	0	0	0	0	0	4	-99	0	-99	-99
201503090014	2015	3	9	0	1	1	0	1	0	60	10	31.212225	34.117065	0	3	0	0	0	6	12	0	0	0	0	0	0	4	35	60	0	0	0	0	0	0	-99	0	3	0	0	3	0	0	1	4	-99	0	-99	-99
201503090015	2015	3	9	0	1	1	1	0	0	60	10	31.131111	30.13	0	3	2	0	0	6	16	5	5	0	0	0	0	8	49	60	0	0	0	0	0	0	-99	0	0	0	0	2	0	0	0	4	-99	0	-99	-99
201503090016	2015	3	9	0	1	1	1	0	1	60	10	31.238023	29.999354	0	2	0	0	0	8	19	0	0	0	0	0	0	1	3	60	0	0	0	0	0	0	-99	0	0	0	0	0	0	0	-9	4	-99	0	-99	-99
201503090023	2015	3	9	0	1	1	1	0	0	153	6	29.555805	66.019589	0	2	0	0	0	5	2	0	0	0	0	0	0	3	23	153	0	0	0	0	0	0	-99	0	2	0	0	0	0	0	1	3	-99	0	-99	-99
201503090062	2015	3	9	0	1	1	1	0	0	603	8	54.607712	-5.95621	0	3	0	0	0	6	31	0	0	0	0	0	0	14	76	233	0	0	0	0	0	0	-99	0	0	0	0	0	0	0	0	4	-99	0	-99	-99
201503090063	2015	3	9	0	1	1	1	0	0	19	6	22.820166	89.555801	0	3	0	0	0	6	17	0	0	0	0	0	0	19	99	19	0	0	0	0	0	0	-99	0	0	0	0	3	0	0	1	3	-99	0	-99	-99
201503090065	2015	3	9	0	1	1	0	1	0	34	11	-3.375828	29.364107	1	2	0	0	0	5	5	0	0	0	0	0	0	4	27	34	0	0	0	0	0	0	-99	0	0	0	0	0	0	0	-9	4	-99	0	-99	-99
201503090066	2015	3	9	0	1	1	1	0	0	60	10	31.200092	29.918649	0	3	0	0	0	6	16	0	0	0	0	0	0	8	49	60	0	0	0	0	0	0	-99	0	0	0	0	0	0	0	0	4	-99	0	-99	-99
201503090068	2015	3	9	0	1	1	1	0	0	214	9	48.637352	39.201656	1	3	0	0	0	6	16	0	0	0	0	0	0	19	100	214	0	0	0	0	0	0	-99	0	0	0	0	0	0	0	1	4	-99	0	-99	-99
201503090095	2015	3	9	0	1	1	1	0	0	60	10	31.210951	29.946908	0	3	0	0	0	6	16	0	0	0	0	0	0	1	7	60	0	0	0	0	0	0	-99	0	0	0	0	0	0	0	1	3	-99	0	-99	-99
201503090103	2015	3	9	0	1	1	1	0	0	173	10	30.976266	41.018741	0	3	2	0	1	6	13	5	5	0	0	0	0	3	23	173	0	0	0	0	0	0	2	0	4	0	2	1	0	0	0	4	-99	0	-99	-99
201503090104	2015	3	9	0	1	1	1	0	1	113	10	32.069286	20.151144	0	3	0	0	0	6	11	0	0	0	0	0	0	4	34	113	14	75	113	0	0	0	-99	0	0	0	0	2	0	0	0	4	-99	0	-99	-99
201503100001	2015	3	7	0	1	1	1	0	0	113	10	32.073238	23.944855	0	3	0	0	0	6	15	0	0	0	0	0	0	1	6	113	0	0	0	0	0	0	2	2	0	0	0	0	0	0	0	4	-99	0	-99	-99
201503100007	2015	3	10	0	1	1	1	0	0	60	10	29.311707	30.838812	0	3	0	0	0	6	16	0	0	0	0	0	0	4	36	60	0	0	0	0	0	0	2	0	2	0	2	0	0	0	0	4	-99	0	-99	-99
201503100009	2015	3	10	0	1	1	1	0	0	153	6	30.68313	66.712624	0	2	0	0	0	5	5	0	0	0	0	0	0	3	25	153	0	0	0	0	0	0	2	0	1	0	0	0	0	0	0	4	-99	0	-99	-99
201503100010	2015	3	10	0	1	1	1	0	0	153	6	30.271502	68.32032	1	2	0	0	0	5	5	0	0	0	0	0	0	3	25	153	0	0	0	0	0	0	-99	0	1	0	0	0	0	0	0	4	-99	0	-99	-99
201503100023	2015	3	10	0	1	1	1	0	0	147	11	11.840929	13.141459	0	3	0	0	0	6	16	0	0	0	0	0	0	14	74	147	0	0	0	0	0	0	-99	0	0	0	0	0	0	0	0	4	-99	0	-99	-99
201503100036	2015	3	10	0	1	1	1	0	0	95	10	33.303566	44.371773	0	3	0	0	0	6	16	0	0	0	0	0	0	14	74	95	0	0	0	0	0	0	-99	0	0	0	0	8	0	0	-9	4	-99	0	-99	-99
201503100037	2015	3	10	0	1	1	1	0	0	95	10	33.303566	44.371773	0	1	0	0	0	5	5	0	0	0	0	0	0	3	25	95	0	0	0	0	0	0	-99	0	1	0	0	0	0	0	0	4	-99	0	-99	-99
201503100041	2015	3	9	0	1	1	1	0	0	153	6	24.891115	67.143311	0	2	0	0	0	5	5	0	0	0	0	0	0	22	109	153	0	0	0	0	0	0	-99	0	1	0	0	0	0	0	0	4	-99	0	-99	-99
201503100042	2015	3	10	0	1	1	1	0	0	153	6	24.891115	67.143311	0	2	0	0	0	5	3	0	0	0	0	0	0	3	23	153	0	0	0	0	0	0	4	0	3	0	0	1	0	0	1	3	-99	0	-99	-99
201503100043	2015	3	10	0	1	1	1	0	0	153	6	24.891115	67.143311	0	2	0	0	0	5	5	0	0	0	0	0	0	3	23	153	0	0	0	0	0	0	4	0	1	0	0	1	0	0	1	3	-99	0	-99	-99
201503100044	2015	3	10	0	1	1	1	0	0	153	6	31.816667	70.916667	0	3	0	0	0	6	7	0	0	0	0	0	0	2	18	153	0	0	0	0	0	0	-99	0	0	0	0	0	0	0	1	3	-99	0	-99	-99
201503100063	2015	3	10	0	1	1	1	0	1	4	6	32.484306	62.034711	0	3	0	0	0	6	8	0	0	0	0	0	0	2	18	4	8	48	4	0	0	0	-99	0	0	0	0	2	0	0	0	4	-99	0	-99	-99
201503100071	2015	3	10	0	1	1	1	0	0	603	8	54.516462	-5.889722	0	3	0	0	0	6	31	0	0	0	0	0	0	14	76	233	0	0	0	0	0	0	-99	0	0	0	0	0	0	0	0	4	-99	0	-99	-99
201503100076	2015	3	10	0	1	1	0	1	0	97	10	32.981558	35.749457	0	2	0	0	0	5	5	0	0	0	0	0	0	4	34	97	0	0	0	0	0	0	-99	0	0	0	0	1	0	0	0	4	-99	0	-99	-99
201503100083	2015	3	10	0	1	1	1	0	0	19	6	23.791275	90.418205	0	3	0	0	0	6	17	0	0	0	0	0	0	1	7	19	0	0	0	0	0	0	-99	0	0	0	0	1	0	0	1	3	-99	0	-99	-99
201503100092	2015	3	10	0	1	1	1	0	0	205	5	6.874803	101.416882	1	2	0	0	0	5	5	0	0	0	0	0	0	1	9	205	0	0	0	0	0	0	-99	0	0	0	0	2	0	0	0	4	-99	0	-99	-99
201503100094	2015	3	10	0	1	1	1	0	0	203	11	-1.551364	31.70387	0	7	0	0	0	8	18	0	0	0	0	0	0	15	86	203	0	0	0	0	0	0	-99	0	0	0	0	0	0	0	1	3	-99	0	-99	-99
201503110001	2015	3	11	0	1	1	1	0	0	160	5	7.535447	123.194732	0	1	0	0	0	5	5	0	0	0	0	0	0	2	15	160	0	0	0	0	0	0	1	0	1	0	0	0	0	0	1	3	-99	0	-99	-99
201503110008	2015	3	11	0	1	1	1	0	0	60	10	30.560456	31.007948	0	5	2	0	0	8	18	9	24	0	0	0	0	3	24	60	0	0	0	0	0	0	7	0	0	0	0	0	0	0	1	3	-99	1	3	0
201503110011	2015	3	11	1	1	1	1	0	0	4	6	34.280914	62.613104	0	6	0	0	0	5	5	0	0	0	0	0	0	2	18	4	0	0	0	0	0	0	-99	0	0	0	0	0	0	0	0	4	-99	1	6	0
201503110028	2015	3	11	0	1	1	1	0	0	95	10	33.247181	44.025452	0	3	0	0	0	6	16	0	0	0	0	0	0	3	23	95	0	0	0	0	0	0	-99	0	1	0	0	4	0	0	0	4	-99	0	-99	-99
201503110029	2015	3	11	0	1	1	1	0	0	95	10	33.303566	44.371773	0	3	0	0	0	6	16	0	0	0	0	0	0	14	74	95	0	0	0	0	0	0	-99	0	2	0	0	7	0	0	-9	4	-99	0	-99	-99
201503110050	2015	3	11	0	1	1	1	0	0	95	10	33.303566	44.371773	0	3	0	0	0	6	15	0	0	0	0	0	0	14	67	95	0	0	0	0	0	0	-99	0	6	0	0	30	0	0	-9	4	-99	0	-99	-99
201503110051	2015	3	11	0	1	1	1	0	0	95	10	33.540672	44.251266	0	3	0	0	0	6	16	0	0	0	0	0	0	14	67	95	0	0	0	0	0	0	-99	0	2	0	0	0	0	0	0	4	-99	0	-99	-99
201503110058	2015	3	11	0	1	1	1	0	0	123	11	15.666816	0.508533	0	4	0	0	0	5	5	0	0	0	0	0	0	12	62	422	0	0	0	0	0	0	-99	0	0	0	0	0	0	0	1	3	-99	0	-99	-99
201503110060	2015	3	11	0	1	1	1	0	0	19	6	23.791275	90.418205	0	3	0	0	0	6	17	0	0	0	0	0	0	3	25	19	8	49	19	0	0	0	-99	0	0	0	0	2	0	0	-9	4	-99	0	-99	-99
201503110070	2015	3	11	0	1	1	1	0	0	147	11	7.217215	8.980391	0	1	0	0	0	5	5	0	0	0	0	0	0	22	109	147	0	0	0	0	0	0	-99	0	2	0	0	2	0	0	1	3	-99	0	-99	-99
201503110071	2015	3	11	0	1	1	1	0	0	147	11	5.558283	5.489602	0	3	0	0	0	6	16	0	0	0	0	0	0	21	106	147	0	0	0	0	0	0	-99	0	0	0	0	0	0	0	1	4	-99	0	-99	-99
201503110072	2015	3	11	0	1	1	1	0	0	160	5	16.029468	120.473846	0	1	0	0	0	5	5	0	0	0	0	0	0	2	15	160	0	0	0	0	0	0	1	0	0	0	0	1	0	0	1	3	-99	0	-99	-99
201503120024	2015	3	12	0	1	1	0	1	0	60	10	30.783333	34.05	0	2	0	0	0	6	11	5	5	0	0	0	0	4	36	60	0	0	0	0	0	0	-99	0	0	0	0	3	0	0	0	4	-99	0	-99	-99
201503120035	2015	3	12	0	1	1	1	0	0	95	10	33.303566	44.371773	0	3	0	0	0	6	16	0	0	0	0	0	0	14	74	95	0	0	0	0	0	0	-99	0	1	0	0	9	0	0	-9	4	-99	0	-99	-99
201503120039	2015	3	12	0	1	1	1	0	0	92	6	25.651754	90.803218	0	3	0	0	0	6	7	0	0	0	0	0	0	1	7	92	0	0	0	0	0	0	-99	0	0	0	0	0	0	0	-9	4	-99	0	-99	-99
201503120040	2015	3	12	1	1	1	1	0	0	92	6	25.79661	93.046705	0	6	0	0	0	13	0	0	0	0	0	0	0	8	50	92	0	0	0	0	0	0	-99	0	0	0	0	0	0	0	0	4	-99	1	1	0
201503120041	2015	3	12	0	1	1	1	0	0	153	6	32.306099	69.579956	0	3	0	0	0	6	16	0	0	0	0	0	0	1	7	153	0	0	0	0	0	0	-99	0	0	0	0	0	0	0	1	3	-99	0	-99	-99
201503120060	2015	3	12	0	1	1	1	0	0	19	6	23.791275	90.418205	0	3	0	0	0	6	17	0	0	0	0	0	0	3	22	19	0	0	0	0	0	0	-99	0	0	0	0	0	0	0	-9	4	-99	0	-99	-99
201503120068	2015	3	12	0	1	1	1	0	0	60	10	30.084629	31.334314	0	3	0	0	0	6	16	0	0	0	0	0	0	20	0	60	0	0	0	0	0	0	-99	0	0	0	0	0	0	0	1	4	-99	0	-99	-99
201503120084	2015	3	12	0	1	1	1	0	0	203	11	-2.191728	31.476542	0	7	0	0	0	8	18	0	0	0	0	0	0	15	86	203	0	0	0	0	0	0	-99	0	0	0	0	0	0	0	1	3	-99	0	-99	-99
201503130017	2015	3	13	1	1	1	1	0	0	113	10	32.867867	13.189067	0	6	0	0	0	5	5	0	0	0	0	0	0	14	84	113	0	0	0	0	0	0	-99	0	0	0	0	0	0	0	0	4	-99	1	1	0
201503130019	2015	3	13	0	1	1	1	0	0	95	10	33.303566	44.371773	0	3	0	0	0	6	16	0	0	0	0	0	0	1	2	95	0	0	0	0	0	0	-99	0	1	0	0	9	0	0	-9	4	-99	0	-99	-99
201503130024	2015	3	13	0	1	1	1	0	0	95	10	33.303566	44.371773	0	3	0	0	0	6	16	0	0	0	0	0	0	14	67	95	0	0	0	0	0	0	-99	0	2	0	0	10	0	0	0	4	-99	0	-99	-99
201503130025	2015	3	13	0	1	1	1	0	0	95	10	33.303566	44.371773	0	3	0	0	0	6	16	0	0	0	0	0	0	14	67	95	0	0	0	0	0	0	-99	0	1	0	0	7	0	0	0	4	-99	0	-99	-99
201503130027	2015	3	13	0	1	1	1	0	0	95	10	34.705948	43.697075	0	3	0	0	1	6	13	0	0	0	0	0	0	20	0	95	0	0	0	0	0	0	2	0	2	0	2	0	0	0	0	4	-99	0	-99	-99
201503130030	2015	3	13	0	1	1	1	0	0	95	10	33.100529	44.584492	0	3	0	0	0	6	16	0	0	0	0	0	0	14	74	95	0	0	0	0	0	0	-99	0	4	0	0	7	0	0	-9	4	-99	0	-99	-99
201503130039	2015	3	13	0	1	1	1	0	0	60	10	30.084629	31.334314	0	3	0	0	0	6	16	0	0	0	0	0	0	1	7	60	0	0	0	0	0	0	-99	0	0	0	0	0	0	0	-9	4	-99	0	-99	-99
201503130040	2015	3	13	0	1	1	1	0	0	60	10	30.084629	31.334314	0	3	0	0	0	6	16	0	0	0	0	0	0	20	0	60	0	0	0	0	0	0	-99	0	0	0	0	0	0	0	0	4	-99	0	-99	-99
201503130041	2015	3	13	0	1	1	1	0	0	60	10	30.084629	31.334314	0	3	0	0	0	6	16	0	0	0	0	0	0	20	0	60	0	0	0	0	0	0	-99	0	0	0	0	0	0	0	0	4	-99	0	-99	-99
201503130045	2015	3	13	0	1	1	1	0	0	60	10	31.126646	33.800865	1	3	0	0	0	6	16	0	0	0	0	0	0	20	0	60	0	0	0	0	0	0	-99	0	0	0	0	0	0	0	1	3	-99	0	-99	-99
201503140002	2015	3	14	0	1	1	1	0	0	153	6	24.891115	67.143311	0	3	0	0	0	6	17	0	0	0	0	0	0	1	2	153	0	0	0	0	0	0	-99	0	2	0	0	12	0	0	1	3	-99	0	-99	-99
201503140003	2015	3	14	0	1	1	1	0	0	60	10	31.200092	29.918649	0	3	0	0	0	6	16	0	0	0	0	0	0	1	3	60	0	0	0	0	0	0	-99	0	0	0	0	4	0	0	-9	4	-99	0	-99	-99
201503140004	2015	3	14	0	1	1	1	0	0	153	6	32.116734	70.157509	0	3	0	0	0	6	17	0	0	0	0	0	0	20	0	153	0	0	0	0	0	0	-99	0	0	0	0	0	0	0	0	4	-99	0	-99	-99
201503140005	2015	3	14	0	1	1	1	0	0	110	10	34.525	36.241667	0	3	0	0	0	6	16	0	0	0	0	0	0	20	0	110	0	0	0	0	0	0	-99	0	0	0	0	0	0	0	0	4	-99	0	-99	-99
201503140007	2015	3	14	0	1	1	1	0	0	60	10	31.212225	34.117065	0	3	0	0	0	6	16	0	0	0	0	0	0	20	0	60	0	0	0	0	0	0	-99	0	0	0	0	0	0	0	0	4	-99	0	-99	-99
201503140008	2015	3	14	0	1	1	1	0	0	60	10	30.084629	31.334314	0	3	0	0	0	6	16	0	0	0	0	0	0	14	77	60	0	0	0	0	0	0	-99	0	1	0	0	0	0	0	0	4	-99	0	-99	-99
201503140009	2015	3	14	0	1	1	1	0	0	60	10	31.197348	29.892957	0	3	0	0	0	6	16	0	0	0	0	0	0	2	14	60	0	0	0	0	0	0	-99	0	0	0	0	1	0	0	1	3	-99	0	-99	-99
201503140014	2015	3	14	0	1	1	1	0	0	205	5	6.690741	101.632843	1	3	0	0	0	6	12	0	0	0	0	0	0	4	39	205	14	67	205	0	0	0	-99	0	0	0	0	6	0	0	0	4	-99	0	-99	-99
201503140023	2015	3	14	0	1	1	1	1	0	113	10	31.206961	16.547762	0	3	0	0	0	6	11	0	0	0	0	0	0	1	4	113	0	0	0	0	0	0	-99	0	0	0	0	0	0	0	1	3	-99	0	-99	-99
201503140029	2015	3	14	0	1	1	1	0	0	19	6	23.791275	90.418205	0	3	0	0	0	6	17	0	0	0	0	0	0	14	68	19	0	0	0	0	0	0	-99	0	0	0	0	2	0	0	-9	4	-99	0	-99	-99
201503140047	2015	3	14	0	1	1	0	1	0	60	10	31.126646	33.800865	0	3	0	0	0	6	16	0	0	0	0	0	0	4	35	60	0	0	0	0	0	0	-99	0	0	0	0	5	0	0	1	4	-99	0	-99	-99
201503140048	2015	3	14	0	1	1	1	0	0	41	11	7.476727	15.601668	0	2	0	0	0	5	5	0	0	0	0	0	0	14	67	41	0	0	0	0	0	0	-99	0	10	0	0	0	0	0	0	4	-99	0	-99	-99
201503140057	2015	3	14	0	0	1	1	1	0	147	11	4.722939	6.778846	0	1	0	0	0	5	5	0	0	0	0	0	0	22	109	147	0	0	0	0	0	0	-99	0	2	0	0	0	0	0	0	4	-99	0	-99	-99
201503150005	2015	3	16	0	1	1	1	0	0	4	6	33.301018	68.405014	0	3	0	0	0	6	8	0	0	0	0	0	0	14	73	4	0	0	0	0	0	0	-99	0	2	0	0	3	0	0	1	3	-99	0	-99	-99
201503150017	2015	3	15	0	1	1	0	1	0	153	6	30.697964	68.354795	1	2	0	0	0	5	5	0	0	0	0	0	0	4	39	153	0	0	0	0	0	0	-99	3	0	0	0	0	0	0	0	4	-99	0	-99	-99
201503150021	2015	3	15	0	1	1	0	1	0	153	6	35.920159	74.307975	0	2	0	0	0	5	5	0	0	0	0	0	0	4	27	153	0	0	0	0	0	0	30	0	0	0	0	5	0	0	1	3	-99	0	-99	-99
201503150022	2015	3	15	0	1	1	1	0	0	153	6	30.200819	66.994354	0	2	0	0	0	5	5	0	0	0	0	0	0	14	68	153	0	0	0	0	0	0	-99	0	2	0	0	0	0	0	0	4	-99	0	-99	-99
201503150023	2015	3	15	0	1	1	1	0	0	95	10	33.303566	44.371773	0	3	0	0	0	6	16	0	0	0	0	0	0	14	76	95	0	0	0	0	0	0	-99	0	3	0	0	6	0	0	-9	4	-99	0	-99	-99
201503150024	2015	3	15	0	1	1	1	0	0	95	10	33.303566	44.371773	0	3	0	0	0	6	16	0	0	0	0	0	0	1	7	95	0	0	0	0	0	0	-99	0	1	0	0	6	0	0	-9	4	-99	0	-99	-99
201503150025	2015	3	15	0	1	1	1	0	0	95	10	33.460819	44.157433	0	3	0	0	0	6	16	0	0	0	0	0	0	14	74	95	0	0	0	0	0	0	-99	0	2	0	0	10	0	0	-9	4	-99	0	-99	-99
201503150027	2015	3	15	1	1	1	1	0	0	195	11	12.951591	24.24782	0	6	0	0	0	13	0	0	0	0	0	0	0	14	67	195	0	0	0	0	0	0	3	0	0	0	0	2	0	0	0	4	-99	1	1	0
201503150032	2015	3	15	0	1	1	1	0	0	19	6	23.791275	90.418205	0	3	0	0	0	6	17	0	0	0	0	0	0	3	25	19	1	7	19	0	0	0	-99	0	0	0	0	3	0	0	-9	4	-99	0	-99	-99
201503150036	2015	3	15	0	1	1	1	0	0	19	6	22.822685	89.552973	0	3	0	0	0	6	17	0	0	0	0	0	0	20	0	19	0	0	0	0	0	0	-99	0	0	0	0	0	0	0	0	4	-99	0	-99	-99
201503150037	2015	3	15	0	1	1	1	0	0	19	6	22.89907	89.502522	0	3	0	0	0	6	17	0	0	0	0	0	0	8	49	19	0	0	0	0	0	0	-99	0	0	0	0	0	0	0	0	4	-99	0	-99	-99
201503150038	2015	3	15	0	1	1	0	1	0	214	9	180	180	0	3	0	0	0	6	8	0	0	0	0	0	0	4	33	214	0	0	0	0	0	0	-99	0	1	0	0	0	0	0	0	4	-99	0	-99	-99
201503150039	2015	3	15	0	1	1	0	1	0	214	9	48.143208	37.753361	1	3	0	0	0	6	11	0	0	0	0	0	0	4	27	214	0	0	0	0	0	0	-99	0	0	0	0	0	0	0	0	4	-99	0	-99	-99
201503150040	2015	3	15	0	1	1	0	1	0	214	9	48.363186	37.891922	0	3	0	0	0	6	11	0	0	0	0	0	0	4	34	214	0	0	0	0	0	0	-99	0	0	0	0	0	0	0	0	4	-99	0	-99	-99
201503150052	2015	3	15	0	1	1	1	0	0	160	5	7.248848	125.055368	0	3	0	0	0	6	7	0	0	0	0	0	0	14	76	160	0	0	0	0	0	0	-99	0	0	0	0	1	0	0	1	3	-99	0	-99	-99
201503150064	2015	3	15	0	1	1	1	0	0	34	11	-3.375828	29.364107	0	2	0	0	0	5	5	0	0	0	0	0	0	22	109	34	0	0	0	0	0	0	-99	0	0	0	0	1	0	0	0	4	-99	0	-99	-99
201503150067	2015	3	15	0	1	1	1	0	0	160	5	6.50694	124.419824	0	1	0	0	0	5	5	0	0	0	0	0	0	2	15	160	0	0	0	0	0	0	-99	0	1	0	0	0	0	0	0	4	-99	0	-99	-99
201503160001	2015	3	16	0	1	1	1	0	0	95	10	33.303566	44.371773	0	3	0	0	0	6	16	0	0	0	0	0	0	1	2	95	0	0	0	0	0	0	-99	0	1	0	0	6	0	0	-9	4	-99	0	-99	-99
201503160003	2015	3	16	0	1	0	1	1	0	113	10	32.392528	14.946144	0	3	0	0	0	6	15	0	0	0	0	0	0	17	94	113	0	0	0	0	0	0	-99	0	1	0	0	0	0	0	-9	4	-99	0	-99	-99
201503160004	2015	3	16	0	1	1	1	0	0	95	10	34.621521	43.668377	0	3	0	0	0	6	15	0	0	0	0	0	0	20	0	95	0	0	0	0	0	0	-99	0	0	0	0	0	0	0	0	4	-99	0	-99	-99
201503160013	2015	3	16	0	1	1	1	0	0	95	10	33.303566	44.371773	0	3	0	0	0	6	16	0	0	0	0	0	0	14	74	95	0	0	0	0	0	0	-99	0	2	0	0	7	0	0	-9	4	-99	0	-99	-99
201503160015	2015	3	16	0	1	1	1	0	0	4	6	31.60063	64.369652	1	3	0	0	1	6	15	0	0	0	0	0	0	3	24	4	14	67	4	0	0	0	1	0	6	0	1	2	0	0	0	4	-99	0	-99	-99
201503160020	2015	3	16	0	1	0	1	1	0	4	6	34.021194	68.999535	0	1	0	0	0	5	2	0	0	0	0	0	0	17	94	4	0	0	0	0	0	0	1	0	0	0	0	0	0	0	-9	4	-99	0	-99	-99
201503160022	2015	3	16	0	1	1	1	0	0	4	6	34.004337	69.214639	0	1	0	0	0	6	7	0	0	0	0	0	0	2	18	4	0	0	0	0	0	0	-99	0	3	0	0	4	0	0	1	3	-99	0	-99	-99
201503160027	2015	3	16	0	1	1	1	0	0	182	11	4.73538	45.2024	0	2	0	0	0	5	3	0	0	0	0	0	0	15	85	182	0	0	0	0	0	0	2	0	1	0	0	0	0	0	0	4	-99	0	-99	-99
201503160049	2015	3	16	0	1	1	1	0	0	19	6	23.791275	90.418205	0	3	0	0	0	6	17	0	0	0	0	0	0	3	25	19	0	0	0	0	0	0	-99	0	0	0	0	1	0	0	-9	4	-99	0	-99	-99
201503160050	2015	3	16	0	1	1	1	0	0	19	6	23.791275	90.418205	1	3	0	0	0	6	17	0	0	0	0	0	0	19	105	19	0	0	0	0	0	0	-99	0	0	0	0	1	0	0	-9	4	-99	0	-99	-99
201503160051	2015	3	15	0	1	1	1	0	0	19	6	22.341896	91.815117	0	3	0	0	0	6	17	0	0	0	0	0	0	14	68	19	0	0	0	0	0	0	-99	0	0	0	0	6	0	0	-9	4	-99	0	-99	-99
201503160052	2015	3	16	0	1	1	1	0	0	19	6	22.813902	89.563737	0	3	0	0	0	6	17	0	0	0	0	0	0	10	0	19	0	0	0	0	0	0	1	0	0	0	0	0	0	0	1	3	-99	0	-99	-99
201503160057	2015	3	16	0	1	1	1	0	0	19	6	24.092264	90.388004	0	3	0	0	0	6	17	0	0	0	0	0	0	20	0	19	0	0	0	0	0	0	-99	0	0	0	0	0	0	0	0	4	-99	0	-99	-99
201503160071	2015	3	16	0	1	1	1	0	0	19	6	22.341896	91.815117	0	7	0	0	0	8	19	0	0	0	0	0	0	22	109	19	0	0	0	0	0	0	-99	0	0	0	0	0	0	0	1	3	-99	0	-99	-99
201503160072	2015	3	16	0	1	1	1	0	0	41	11	4.37474	18.551292	0	2	0	0	0	6	7	5	5	0	0	0	0	4	29	69	14	70	41	0	0	0	-99	0	1	0	1	4	0	1	0	4	-99	0	-99	-99
201503160075	2015	3	16	0	1	1	1	0	0	228	10	15.325443	44.211895	0	1	0	0	0	6	15	0	0	0	0	0	0	22	109	228	0	0	0	0	0	0	-99	0	0	0	0	0	0	0	0	4	-99	0	-99	-99
201503160077	2015	3	16	0	1	1	1	0	0	153	6	180	180	0	3	0	0	0	6	16	0	0	0	0	0	0	3	25	153	0	0	0	0	0	0	1	1	0	0	0	7	0	0	1	3	-99	0	-99	-99
201503170002	2015	3	17	0	1	1	1	0	0	95	10	33.303566	44.371773	0	3	0	0	0	6	16	0	0	0	0	0	0	14	74	95	0	0	0	0	0	0	-99	0	2	0	0	9	0	0	-9	4	-99	0	-99	-99
201503170003	2015	3	17	0	1	1	1	0	0	95	10	33.303566	44.371773	0	3	0	0	0	6	16	0	0	0	0	0	0	14	74	95	0	0	0	0	0	0	-99	0	3	0	0	11	0	0	-9	4	-99	0	-99	-99
201503170004	2015	3	17	0	1	1	1	0	0	95	10	33.07835	44.254719	1	3	0	0	0	6	16	0	0	0	0	0	0	3	23	95	0	0	0	0	0	0	-99	0	2	0	0	5	0	0	0	4	-99	0	-99	-99
201503170005	2015	3	17	0	1	1	1	0	0	95	10	33.170231	44.558002	0	3	0	0	0	6	16	0	0	0	0	0	0	17	94	95	0	0	0	0	0	0	-99	0	1	0	0	5	0	0	0	4	-99	0	-99	-99
201503170006	2015	3	17	0	1	1	1	0	0	95	10	33.303566	44.371773	0	3	0	0	0	6	16	0	0	0	0	0	0	1	2	95	0	0	0	0	0	0	-99	0	1	0	0	8	0	0	-9	4	-99	0	-99	-99
201503170007	2015	3	17	0	1	1	1	0	0	95	10	33.303566	44.371773	0	3	0	0	0	6	16	0	0	0	0	0	0	1	2	95	0	0	0	0	0	0	-99	0	2	0	0	5	0	0	-9	4	-99	0	-99	-99
201503170014	2015	3	17	0	1	1	0	1	0	95	10	33.669689	44.381317	0	3	0	0	1	6	15	0	0	0	0	0	0	4	27	95	0	0	0	0	0	0	3	0	7	0	3	14	0	0	0	4	-99	0	-99	-99
201503170015	2015	3	17	0	1	1	1	0	0	104	11	3.93555	41.854848	0	3	0	0	0	6	16	0	0	0	0	0	0	3	24	104	0	0	0	0	0	0	-99	0	0	0	0	0	0	0	0	4	-99	0	-99	-99
201503170022	2015	3	17	0	1	1	0	1	0	205	5	6.682393	101.541857	1	3	0	0	0	6	17	0	0	0	0	0	0	4	29	205	0	0	0	0	0	0	-99	0	0	0	0	1	0	0	0	4	-99	0	-99	-99
201503170023	2015	3	17	0	1	1	1	0	0	4	6	31.640028	64.24	0	3	0	0	1	6	15	0	0	0	0	0	0	20	0	0	0	0	0	0	0	0	1	1	0	0	0	0	0	0	0	4	-99	0	-99	-99
201503170034	2015	3	17	0	1	1	1	0	0	153	6	35.128889	72.605833	0	3	0	0	0	6	17	0	0	0	0	0	0	20	0	153	0	0	0	0	0	0	-99	0	3	0	0	2	0	0	1	3	-99	0	-99	-99
201503170038	2015	3	17	0	1	1	1	0	0	113	10	32.069286	20.151144	0	3	0	0	0	6	16	0	0	0	0	0	0	20	0	113	0	0	0	0	0	0	1	0	0	0	0	0	0	0	0	4	-99	0	-99	-99
201503170046	2015	3	17	0	1	1	1	0	0	92	6	25.371531	88.556531	0	3	0	0	0	6	17	0	0	0	0	0	0	20	0	92	0	0	0	0	0	0	-99	0	0	0	0	0	0	0	0	4	-99	0	-99	-99
201503170058	2015	3	17	0	1	1	1	0	0	214	9	48.637352	39.201656	1	3	0	0	0	6	16	0	0	0	0	0	0	19	100	214	0	0	0	0	0	0	-99	0	0	0	0	0	0	0	1	4	-99	0	-99	-99
201503170060	2015	2	17	0	1	1	1	0	0	60	10	31.175401	33.985587	0	3	0	0	0	6	16	0	0	0	0	0	0	4	35	60	0	0	0	0	0	0	-99	0	0	0	0	0	0	0	0	4	-99	0	-99	-99
201503170061	2015	3	17	0	1	1	1	0	0	155	10	31.502407	34.459743	0	7	0	0	0	8	20	0	0	0	0	0	0	2	18	155	0	0	0	0	0	0	-99	0	0	0	0	0	0	0	1	3	-99	0	-99	-99
201503180002	2015	3	18	0	1	1	1	0	0	95	10	30.038057	47.925789	0	3	0	0	0	6	15	0	0	0	0	0	0	9	52	95	0	0	0	0	0	0	-99	0	3	0	0	7	0	0	1	3	-99	0	-99	-99
201503180003	2015	3	18	0	1	1	1	0	0	95	10	33.512032	44.217289	0	3	0	0	0	6	16	0	0	0	0	0	0	14	67	95	0	0	0	0	0	0	-99	0	1	0	0	8	0	0	0	4	-99	0	-99	-99
201503180004	2015	3	18	0	1	1	1	0	0	95	10	34.262422	44.185208	0	3	0	0	0	6	16	0	0	0	0	0	0	14	73	95	0	0	0	0	0	0	-99	0	0	0	0	6	0	0	1	3	-99	0	-99	-99
201503180005	2015	3	18	0	1	1	1	0	0	95	10	33.303566	44.371773	0	3	0	0	0	6	16	0	0	0	0	0	0	14	74	95	0	0	0	0	0	0	-99	0	2	0	0	7	0	0	-9	4	-99	0	-99	-99
201503180007	2015	3	18	0	1	1	1	0	0	95	10	33.787562	44.665761	0	1	0	0	0	5	5	0	0	0	0	0	0	2	14	95	0	0	0	0	0	0	-99	0	2	0	0	0	0	0	0	4	-99	0	-99	-99
201503180008	2015	3	18	0	1	1	1	0	0	113	10	32.069286	20.151144	0	3	0	0	0	6	16	0	0	0	0	0	0	20	0	113	0	0	0	0	0	0	-99	0	0	0	0	0	0	0	0	4	-99	0	-99	-99
201503180020	2015	3	18	0	1	1	1	0	0	153	6	30.370974	68.599319	0	3	0	0	0	6	16	0	0	0	0	0	0	20	0	153	0	0	0	0	0	0	-99	0	0	0	0	0	0	0	0	4	-99	0	-99	-99
201503180021	2015	3	18	0	1	1	1	0	0	153	6	28.633307	69.190369	0	3	0	0	0	6	29	6	16	0	0	0	0	20	0	153	0	0	0	0	0	0	-99	0	0	0	0	0	0	0	0	4	-99	0	-99	-99
201503180043	2015	3	18	0	1	1	1	0	0	153	6	34.276111	71.387222	0	3	0	0	0	6	16	0	0	0	0	0	0	8	49	153	0	0	0	0	0	0	-99	0	0	0	0	0	0	0	1	3	-99	0	-99	-99
201503180045	2015	3	18	0	1	1	1	0	0	97	10	30.829562	35.038816	0	3	0	0	0	6	16	0	0	0	0	0	0	20	0	0	0	0	0	0	0	0	-99	0	0	0	0	0	0	0	0	4	-99	0	-99	-99
201503180070	2015	3	18	0	1	1	1	0	0	159	3	-14.086628	-72.102182	0	1	0	0	0	5	5	0	0	0	0	0	0	2	15	159	0	0	0	0	0	0	-99	0	1	0	0	0	0	0	1	3	-99	0	-99	-99
201503190001	2015	3	19	0	1	1	1	0	0	95	10	32.982933	44.361595	1	3	0	0	0	6	15	0	0	0	0	0	0	14	67	95	0	0	0	0	0	0	-99	0	0	0	0	2	0	0	1	3	-99	0	-99	-99
201503190003	2015	3	19	0	1	1	1	0	0	95	10	33.773349	45.149451	0	3	0	0	0	6	16	0	0	0	0	0	0	14	73	95	0	0	0	0	0	0	-99	0	1	0	0	2	0	0	1	3	-99	0	-99	-99
201503190004	2015	3	19	0	1	1	1	0	0	95	10	33.303566	44.371773	0	3	0	0	0	6	16	0	0	0	0	0	0	14	67	95	0	0	0	0	0	0	-99	0	0	0	0	2	0	0	0	4	-99	0	-99	-99
201503190005	2015	3	19	0	1	1	1	0	0	95	10	33.303566	44.371773	0	3	0	0	0	6	16	0	0	0	0	0	0	14	74	95	0	0	0	0	0	0	-99	0	1	0	0	8	0	0	-9	4	-99	0	-99	-99
201503190006	2015	3	19	0	1	1	1	0	0	95	10	33.303566	44.371773	0	3	0	0	0	6	16	0	0	0	0	0	0	1	2	95	0	0	0	0	0	0	-99	0	1	0	0	10	0	0	-9	4	-99	0	-99	-99
201503190007	2015	3	19	0	1	1	1	0	0	95	10	33.303566	44.371773	0	3	0	0	0	6	16	0	0	0	0	0	0	1	7	95	0	0	0	0	0	0	-99	0	2	0	0	8	0	0	-9	4	-99	0	-99	-99
201503190012	2015	3	19	0	1	1	1	0	0	95	10	33.19392	44.408577	0	2	0	0	0	5	2	0	0	0	0	0	0	3	24	95	17	94	95	0	0	0	-99	0	3	0	0	6	0	0	0	4	-99	0	-99	-99
201503190025	2015	3	19	0	1	1	1	0	0	60	10	30.022924	31.185192	0	3	0	0	0	6	17	0	0	0	0	0	0	14	79	60	0	0	0	0	0	0	-99	0	2	0	0	0	0	0	1	3	-99	0	-99	-99
201503190052	2015	3	19	0	1	1	1	0	0	147	11	11.974328	8.50026	0	3	0	0	1	6	13	5	5	0	0	0	0	19	101	147	0	0	0	0	0	0	1	1	0	0	0	1	0	1	0	4	-99	0	-99	-99
201503190053	2015	3	19	0	1	1	1	0	0	160	5	13.583886	123.059763	0	1	0	0	0	5	5	0	0	0	0	0	0	2	15	160	0	0	0	0	0	0	-99	0	0	0	0	1	0	0	0	4	-99	0	-99	-99
201503190055	2015	3	19	0	1	1	1	0	0	19	6	23.532868	88.855106	0	7	0	0	0	8	19	0	0	0	0	0	0	22	109	19	0	0	0	0	0	0	-99	0	0	0	0	0	0	0	1	3	-99	0	-99	-99
201503190056	2015	3	19	0	1	1	0	1	0	92	6	22.365086	85.437557	0	3	0	0	0	6	17	0	0	0	0	0	0	4	34	92	0	0	0	0	0	0	-99	0	0	0	0	0	0	0	0	4	-99	0	-99	-99
201503190059	2015	3	19	0	1	1	0	1	0	214	9	48.747036	38.869106	1	3	0	0	0	6	11	0	0	0	0	0	0	4	34	214	0	0	0	0	0	0	-99	0	0	0	0	0	0	0	0	4	-99	0	-99	-99
201503190060	2015	3	19	0	1	1	0	1	0	214	9	48.701073	38.673027	1	3	0	0	0	6	11	0	0	0	0	0	0	4	36	214	0	0	0	0	0	0	-99	0	0	0	0	0	0	0	0	4	-99	0	-99	-99
201503190064	2015	3	19	0	1	1	0	1	0	214	9	48.660713	39.470314	0	3	0	0	0	6	15	6	11	0	0	0	0	4	34	214	0	0	0	0	0	0	-99	0	0	0	0	0	0	0	1	3	-99	0	-99	-99
201503190067	2015	3	19	0	1	1	0	1	0	214	9	48.747036	38.869106	0	2	0	0	0	6	11	5	5	0	0	0	0	4	34	214	0	0	0	0	0	0	-99	0	0	0	0	0	0	0	0	4	-99	0	-99	-99
201503190070	2015	3	19	0	1	1	1	0	0	160	5	6.942258	124.419824	0	1	0	0	0	6	7	0	0	0	0	0	0	8	50	160	0	0	0	0	0	0	-99	0	0	0	0	0	0	0	0	4	-99	0	-99	-99
201503190071	2015	3	19	0	1	1	1	0	0	147	11	4.867777	5.898714	0	1	0	0	0	6	28	0	0	0	0	0	0	14	77	147	0	0	0	0	0	0	4	0	0	0	0	0	0	0	1	3	-99	0	-99	-99
201503190073	2015	3	19	1	1	1	1	0	1	229	11	-8.187506	21.994822	0	6	7	0	0	8	18	0	0	0	0	0	0	14	75	229	0	0	0	0	0	0	-99	0	0	0	0	0	0	0	1	3	-99	1	-99	0
201503190074	2015	3	19	1	1	1	1	0	1	229	11	-10.496389	22.810833	0	6	7	0	0	8	18	0	0	0	0	0	0	14	75	229	0	0	0	0	0	0	-99	0	0	0	0	0	0	0	1	3	-99	1	-99	0
201503190075	2015	3	19	1	1	1	1	0	1	229	11	-8.885114	26.419389	0	6	7	0	0	8	18	0	0	0	0	0	0	14	75	229	0	0	0	0	0	0	-99	0	0	0	0	0	0	0	1	3	-99	1	-99	0
201503200001	2015	3	20	0	1	1	1	0	0	95	10	33.460819	44.157433	0	3	0	0	0	6	16	0	0	0	0	0	0	14	74	95	0	0	0	0	0	0	-99	0	2	0	0	9	0	0	-9	4	-99	0	-99	-99
201503200002	2015	3	20	0	1	1	1	0	0	95	10	33.303566	44.371773	0	3	0	0	0	6	16	0	0	0	0	0	0	14	74	95	0	0	0	0	0	0	-99	0	1	0	0	7	0	0	-9	4	-99	0	-99	-99
201503200003	2015	3	20	0	1	1	1	0	0	95	10	33.303566	44.371773	0	3	0	0	0	6	16	0	0	0	0	0	0	14	74	95	0	0	0	0	0	0	-99	0	1	0	0	7	0	0	-9	4	-99	0	-99	-99
201503200004	2015	3	20	0	1	1	1	0	0	95	10	33.303566	44.371773	0	3	0	0	0	6	16	0	0	0	0	0	0	1	7	95	0	0	0	0	0	0	-99	0	1	0	0	7	0	0	-9	4	-99	0	-99	-99
201503200015	2015	3	20	0	1	1	0	1	0	228	10	12.825647	44.846416	0	1	0	0	0	5	5	0	0	0	0	0	0	4	39	228	0	0	0	0	0	0	-99	0	4	0	0	0	0	0	1	3	-99	0	-99	-99
201503200030	2015	3	20	0	1	1	1	0	0	4	6	34.930358	71.08857	0	3	0	0	0	6	11	0	0	0	0	0	0	3	22	4	14	76	4	0	0	0	-99	0	2	0	0	5	0	0	1	3	-99	0	-99	-99
201503200032	2015	3	20	0	1	1	1	0	0	153	6	33.529949	71.060012	0	9	0	0	0	13	0	0	0	0	0	0	0	3	22	153	0	0	0	0	0	0	-99	0	0	0	0	1	0	0	0	4	-99	0	-99	-99
201503200033	2015	3	20	0	1	1	1	0	0	228	10	12.825647	44.846416	0	3	0	0	0	6	11	0	0	0	0	0	0	2	17	228	0	0	0	0	0	0	-99	0	0	0	0	0	0	0	0	4	-99	0	-99	-99
201503200036	2015	3	20	0	1	1	1	1	0	217	1	29.984368	-90.257301	0	2	0	0	0	8	19	9	23	2	1	0	0	6	44	217	0	0	0	0	0	0	1	0	1	1	1	2	2	0	0	4	-99	0	-99	-99
201503200041	2015	3	20	0	1	1	1	0	0	19	6	23.791275	90.418205	0	3	0	0	0	6	17	0	0	0	0	0	0	14	68	19	0	0	0	0	0	0	-99	0	0	0	0	1	0	0	-9	4	-99	0	-99	-99
201503200043	2015	3	20	0	1	1	1	0	0	92	6	27.429706	82.176802	0	3	0	0	0	6	17	0	0	0	0	0	0	20	0	92	0	0	0	0	0	0	-99	0	0	0	0	0	0	0	0	4	-99	0	-99	-99
201503200045	2015	3	20	0	1	1	0	1	0	214	9	48.020912	37.529469	0	3	0	0	0	6	11	0	0	0	0	0	0	4	34	214	0	0	0	0	0	0	-99	0	0	0	0	0	0	0	0	4	-99	0	-99	-99
201503200046	2015	3	20	0	1	1	0	1	0	214	9	48.064426	37.673248	0	3	0	0	0	6	11	0	0	0	0	0	0	4	34	214	0	0	0	0	0	0	-99	0	0	0	0	0	0	0	0	4	-99	0	-99	-99
201503200058	2015	3	20	0	1	1	1	0	0	214	9	48.307319	38.040428	0	3	0	0	0	6	8	0	0	0	0	0	0	1	1	214	0	0	0	0	0	0	-99	0	2	0	0	0	0	0	1	4	-99	0	-99	-99
201503200060	2015	3	20	0	1	1	1	0	0	19	6	24.319166	89.569266	0	7	0	0	0	8	18	0	0	0	0	0	0	2	21	19	0	0	0	0	0	0	-99	0	0	0	0	0	0	0	1	3	-99	0	-99	-99
201503210001	2015	3	21	0	1	1	1	0	0	95	10	33.303566	44.371773	0	3	0	0	0	6	15	0	0	0	0	0	0	19	105	95	0	0	0	0	0	0	-99	0	2	0	0	6	0	0	1	3	-99	0	-99	-99
201503210002	2015	3	21	0	1	1	1	0	0	95	10	33.303566	44.371773	0	1	0	0	0	6	15	0	0	0	0	0	0	2	18	95	0	0	0	0	0	0	-99	0	1	0	0	0	0	0	1	3	-99	0	-99	-99
201503210003	2015	3	21	0	1	1	1	0	0	95	10	33.303566	44.371773	0	3	0	0	0	6	16	0	0	0	0	0	0	1	7	95	0	0	0	0	0	0	-99	0	1	0	0	9	0	0	-9	4	-99	0	-99	-99
201503210026	2015	3	21	0	1	1	1	0	0	4	6	36.665009	65.752	0	1	0	0	0	6	16	5	3	0	0	0	0	2	15	4	0	0	0	0	0	0	1	1	0	0	0	0	0	0	0	4	-99	0	-99	-99
201503210027	2015	3	21	0	1	1	1	0	0	4	6	34.464395	70.480041	0	3	0	0	1	6	15	0	0	0	0	0	0	4	29	4	14	67	4	0	0	0	1	0	1	0	1	5	0	0	0	4	-99	0	-99	-99
201503210030	2015	3	21	0	1	1	1	0	0	205	5	6.241925	101.809358	1	3	0	0	0	6	17	0	0	0	0	0	0	3	23	205	0	0	0	0	0	0	-99	0	0	0	0	0	0	0	1	3	-99	0	-99	-99
201503210033	2015	3	21	0	1	1	1	0	0	4	6	36.062944	64.988808	0	3	0	0	0	6	8	0	0	0	0	0	0	14	67	4	0	0	0	0	0	0	-99	0	2	0	0	3	0	0	0	4	-99	0	-99	-99
201503210036	2015	3	21	0	1	1	1	0	0	228	10	15.325443	44.211895	0	3	0	0	0	6	16	0	0	0	0	0	0	20	0	228	0	0	0	0	0	0	-99	0	0	0	0	0	0	0	0	4	-99	0	-99	-99
201503210042	2015	3	21	0	1	1	1	0	0	19	6	23.791275	90.418205	0	3	0	0	0	6	17	0	0	0	0	0	0	3	25	19	0	0	0	0	0	0	-99	0	0	0	0	2	0	0	-9	4	-99	0	-99	-99
201503210043	2015	3	21	0	1	1	1	0	0	19	6	22.817722	89.555352	0	3	0	0	0	6	17	0	0	0	0	0	0	22	110	19	0	0	0	0	0	0	-99	0	0	0	0	1	0	0	1	3	-99	0	-99	-99
201503210045	2015	3	21	0	1	1	1	0	0	138	5	22.036199	98.133856	0	3	0	0	0	6	7	0	0	0	0	0	0	14	65	138	0	0	0	0	0	0	-99	0	0	0	0	0	0	0	-9	4	-99	0	-99	-99
201503210056	2015	3	21	0	1	1	1	0	0	153	6	24.891115	67.143311	0	2	0	0	0	5	5	0	0	0	0	0	0	14	69	153	0	0	0	0	0	0	-99	0	1	0	0	0	0	0	-9	4	-99	0	-99	-99
201503210057	2015	3	20	0	1	1	1	0	0	214	9	48.434017	38.221252	1	3	0	0	0	6	8	0	0	0	0	0	0	1	1	214	0	0	0	0	0	0	-99	0	2	0	0	1	0	0	0	4	-99	0	-99	-99
201503220001	2015	3	22	0	1	1	1	0	0	95	10	33.303566	44.371773	0	3	0	0	0	6	16	0	0	0	0	0	0	19	99	95	0	0	0	0	0	0	-99	0	2	0	0	7	0	0	1	3	-99	0	-99	-99
201503220002	2015	3	22	0	1	1	1	0	0	95	10	33.057991	44.354839	0	3	0	0	0	6	16	0	0	0	0	0	0	14	67	95	0	0	0	0	0	0	-99	0	1	0	0	5	0	0	0	4	-99	0	-99	-99
201503220003	2015	3	22	0	1	1	1	0	0	95	10	33.303566	44.371773	0	3	0	0	0	6	16	0	0	0	0	0	0	14	79	95	0	0	0	0	0	0	-99	0	2	0	0	6	0	0	-9	4	-99	0	-99	-99
201503220004	2015	3	22	0	1	1	1	0	0	95	10	33.649971	44.261543	0	3	0	0	0	6	16	0	0	0	0	0	0	1	1	95	0	0	0	0	0	0	-99	0	1	0	0	8	0	0	-9	4	-99	0	-99	-99
201503220005	2015	3	22	0	1	1	1	0	0	95	10	33.303566	44.371773	0	3	0	0	0	6	16	0	0	0	0	0	0	14	67	95	0	0	0	0	0	0	-99	0	1	0	0	9	0	0	0	4	-99	0	-99	-99
201503220008	2015	3	22	0	1	1	0	1	0	113	10	32.069286	20.151144	0	1	0	0	0	5	4	0	0	0	0	0	0	4	33	113	0	0	0	0	0	0	1	0	0	0	0	0	0	0	0	4	-99	0	-99	-99
201503220018	2015	3	22	0	1	1	1	0	0	182	11	2.059819	45.326115	0	3	0	0	0	6	7	0	0	0	0	0	0	3	22	182	0	0	0	0	0	0	-99	0	0	0	0	2	0	0	1	3	-99	0	-99	-99
201503220021	2015	3	22	0	1	1	1	0	0	153	6	29.143866	69.099785	0	3	0	0	0	6	11	0	0	0	0	0	0	14	76	153	0	0	0	0	0	0	-99	0	0	0	0	0	0	0	1	3	-99	0	-99	-99
201503220022	2015	3	22	0	1	1	1	0	0	153	6	28.380661	68.343147	0	3	0	0	0	6	16	0	0	0	0	0	0	21	106	153	0	0	0	0	0	0	-99	0	0	0	0	0	0	0	1	4	-99	0	-99	-99
201503220029	2015	3	22	0	1	1	0	1	0	228	10	15.840202	48.45438	0	3	0	0	0	6	16	0	0	0	0	0	0	4	35	228	0	0	0	0	0	0	-99	0	0	0	0	1	0	0	1	4	-99	0	-99	-99
201503220038	2015	3	22	0	1	1	1	0	0	92	6	23.259933	77.412749	0	1	0	0	0	13	0	0	0	0	0	0	0	10	53	92	0	0	0	0	0	0	4	0	0	0	0	1	0	0	0	4	-99	0	-99	-99
201503220058	2015	3	22	0	0	1	1	1	0	160	5	6.862806	124.443649	0	3	0	0	0	6	7	0	0	0	0	0	0	2	15	160	0	0	0	0	0	0	2	0	0	0	0	0	0	0	1	3	-99	0	-99	-99
201503220059	2015	3	22	0	1	1	1	0	0	92	6	23.708554	87.084012	0	3	0	0	0	6	16	0	0	0	0	0	0	14	84	92	0	0	0	0	0	0	-99	0	0	0	0	0	0	0	1	3	-99	0	-99	-99
201503220061	2015	3	22	0	1	1	1	0	0	153	6	28.242526	69.183451	0	3	0	0	0	6	8	0	0	0	0	0	0	14	73	153	0	0	0	0	0	0	-99	0	0	0	0	2	0	0	1	3	-99	0	-99	-99
201503230002	2015	3	23	0	1	1	0	1	0	95	10	33.303566	44.371773	0	3	0	0	0	6	16	0	0	0	0	0	0	4	29	95	0	0	0	0	0	0	-99	0	0	0	0	2	0	0	0	4	-99	0	-99	-99
201503230007	2015	3	23	0	1	1	1	0	0	113	10	31.197586	16.586681	0	2	0	0	0	5	5	0	0	0	0	0	0	15	86	113	0	0	0	0	0	0	1	0	0	0	0	0	0	0	0	4	-99	0	-99	-99
201503230013	2015	3	21	0	1	1	1	0	0	4	6	36.947944	65.116341	0	6	0	0	0	5	5	0	0	0	0	0	0	14	77	4	14	67	4	0	0	0	-99	0	5	0	0	0	0	0	0	4	-99	1	5	0
201503230014	2015	3	23	0	1	1	1	0	0	95	10	33.74324	44.623825	0	1	0	0	0	5	2	0	0	0	0	0	0	2	18	95	0	0	0	0	0	0	-99	0	2	0	0	0	0	0	0	4	-99	0	-99	-99
201503230015	2015	3	23	0	1	1	1	0	0	95	10	33.303566	44.371773	0	3	0	0	0	6	11	0	0	0	0	0	0	3	25	95	0	0	0	0	0	0	-99	0	0	0	0	2	0	0	1	3	-99	0	-99	-99
201503230016	2015	3	21	1	1	1	1	0	0	4	6	33.633989	62.256721	0	6	0	0	0	5	5	0	0	0	0	0	0	2	18	4	0	0	0	0	0	0	-99	0	0	0	0	0	0	0	0	4	-99	1	1	0
201503230026	2015	3	23	0	1	1	1	0	0	95	10	33.303566	44.371773	0	3	0	0	0	6	15	0	0	0	0	0	0	14	74	95	0	0	0	0	0	0	-99	0	6	0	0	14	0	0	1	3	-99	0	-99	-99
201503230028	2015	3	23	0	1	1	1	0	0	95	10	33.303566	44.371773	0	3	0	0	0	6	11	0	0	0	0	0	0	14	75	95	0	0	0	0	0	0	-99	0	0	0	0	4	0	0	-9	4	-99	0	-99	-99
201503230049	2015	3	23	0	1	1	1	0	0	160	5	15.13405	120.969389	1	1	0	0	0	5	3	0	0	0	0	0	0	2	14	160	0	0	0	0	0	0	4	0	0	0	0	2	0	0	1	3	-99	0	-99	-99
201503230051	2015	3	23	0	1	1	1	0	1	200	10	36.201721	37.14352	0	3	0	0	0	6	11	0	0	0	0	0	0	14	75	200	0	0	0	0	0	0	-99	0	4	0	0	11	0	0	-9	4	-99	0	-99	-99
201503230052	2015	3	23	0	1	1	1	0	1	200	10	36.201721	37.14352	0	3	0	0	0	6	11	0	0	0	0	0	0	14	75	200	0	0	0	0	0	0	-99	0	3	0	0	11	0	0	-9	4	-99	0	-99	-99
201503230053	2015	3	23	0	1	1	1	0	1	200	10	36.201721	37.14352	0	3	0	0	0	6	11	0	0	0	0	0	0	14	74	200	0	0	0	0	0	0	-99	0	3	0	0	11	0	0	-9	4	-99	0	-99	-99
201503230054	2015	3	23	0	1	1	1	0	0	95	10	33.303566	44.371773	0	3	0	0	0	6	16	0	0	0	0	0	0	2	20	95	0	0	0	0	0	0	-99	0	4	0	0	0	0	0	-9	4	-99	0	-99	-99
201503230055	2015	3	22	0	1	1	1	0	0	214	9	46.435854	30.732741	0	3	0	0	0	6	17	0	0	0	0	0	0	12	61	214	0	0	0	0	0	0	-99	0	0	0	0	0	0	0	1	3	-99	0	-99	-99
201503230061	2015	3	23	0	1	1	0	1	0	214	9	47.981647	37.762325	0	2	0	0	0	6	11	5	5	0	0	0	0	4	27	214	0	0	0	0	0	0	-99	0	0	0	0	3	0	0	0	4	-99	0	-99	-99
201503230062	2015	3	23	0	1	1	0	1	0	214	9	48.574041	39.307815	0	2	0	0	0	6	11	5	5	0	0	0	0	4	34	214	0	0	0	0	0	0	-99	0	0	0	0	0	0	0	0	4	-99	0	-99	-99
201503230068	2015	3	23	0	1	1	1	0	0	60	10	29.966834	32.549718	0	2	0	0	0	5	5	0	0	0	0	0	0	3	23	60	0	0	0	0	0	0	-99	0	0	0	0	1	0	0	0	4	-99	0	-99	-99
201503230069	2015	3	22	0	1	1	1	0	0	19	6	23.791275	90.418205	0	3	0	0	0	6	17	0	0	0	0	0	0	8	49	19	0	0	0	0	0	0	-99	0	0	0	0	2	0	0	1	3	-99	0	-99	-99
201503230077	2015	3	23	0	1	1	1	0	0	60	10	31.126646	33.800865	0	3	0	0	0	6	16	0	0	0	0	0	0	20	0	60	0	0	0	0	0	0	-99	0	0	0	0	0	0	0	0	4	-99	0	-99	-99
201503230078	2015	3	23	0	1	1	1	0	0	60	10	31.212225	34.117065	0	3	0	0	0	6	16	0	0	0	0	0	0	20	0	60	0	0	0	0	0	0	-99	0	0	0	0	0	0	0	0	4	-99	0	-99	-99
201503230079	2015	3	23	0	1	1	1	0	0	60	10	31.250196	34.24128	0	3	0	0	0	6	16	0	0	0	0	0	0	20	0	60	0	0	0	0	0	0	-99	0	0	0	0	0	0	0	0	4	-99	0	-99	-99
201503230080	2015	3	23	0	1	1	1	0	0	60	10	31.211882	34.124159	0	3	0	0	0	6	16	0	0	0	0	0	0	20	0	60	0	0	0	0	0	0	-99	0	0	0	0	0	0	0	0	4	-99	0	-99	-99
201503230081	2015	3	23	0	1	1	1	0	0	60	10	31.16983	34.087421	0	2	0	0	0	5	5	0	0	0	0	0	0	2	21	60	0	0	0	0	0	0	-99	0	0	0	0	0	0	0	-9	4	-99	0	-99	-99
201503230082	2015	3	23	0	1	1	1	0	0	60	10	31.156792	34.123059	0	3	0	0	0	6	11	0	0	0	0	0	0	8	49	60	0	0	0	0	0	0	-99	0	0	0	0	0	0	0	-9	4	-99	0	-99	-99
201503230083	2015	3	23	0	1	1	1	0	0	153	6	28.245169	69.183701	0	3	0	0	0	6	16	0	0	0	0	0	0	20	0	153	0	0	0	0	0	0	-99	0	0	0	0	0	0	0	0	4	-99	0	-99	-99
201503240015	2015	3	24	0	1	1	1	0	0	182	11	4.683333	46.616667	0	3	0	0	0	6	15	0	0	0	0	0	0	20	0	0	0	0	0	0	0	0	2	2	0	0	0	0	0	0	0	4	-99	0	-99	-99
201503240018	2015	3	24	1	1	1	1	0	0	113	10	32.867867	13.189067	0	6	2	0	0	5	2	0	0	0	0	0	0	2	15	113	0	0	0	0	0	0	-99	0	0	0	0	0	0	0	1	3	-99	1	2	0
201503240021	2015	3	24	0	1	1	1	0	0	113	10	32.867867	13.189067	0	6	0	0	0	13	0	0	0	0	0	0	0	7	45	195	0	0	0	0	0	0	-99	0	0	0	0	0	0	0	0	4	-99	1	1	0
201503240022	2015	3	23	0	1	1	1	0	0	4	6	34.956696	70.75236	0	3	0	0	0	6	8	0	0	0	0	0	0	3	25	4	0	0	0	0	0	0	-99	0	1	0	0	1	0	0	0	4	-99	0	-99	-99
201503240025	2015	3	22	0	1	1	1	0	0	4	6	33.335258	69.928467	0	3	0	0	0	6	8	0	0	0	0	0	0	1	7	4	0	0	0	0	0	0	-99	0	0	0	0	1	0	0	-9	4	-99	0	-99	-99
201503240026	2015	3	24	0	1	1	1	0	0	95	10	33.303566	44.371773	0	3	0	0	0	6	15	0	0	0	0	0	0	2	18	95	0	0	0	0	0	0	-99	0	1	0	0	0	0	0	1	3	-99	0	-99	-99
201503240027	2015	3	24	0	1	1	1	0	0	95	10	33.303566	44.371773	0	3	0	0	0	6	16	0	0	0	0	0	0	14	74	95	0	0	0	0	0	0	-99	0	1	0	0	8	0	0	-9	4	-99	0	-99	-99
201503240028	2015	3	24	0	1	1	1	0	0	95	10	33.303566	44.371773	0	3	0	0	0	6	16	0	0	0	0	0	0	14	67	95	0	0	0	0	0	0	-99	0	1	0	0	7	0	0	0	4	-99	0	-99	-99
201503240029	2015	3	24	0	1	1	1	0	0	95	10	33.303566	44.371773	0	3	0	0	0	6	16	0	0	0	0	0	0	1	7	95	0	0	0	0	0	0	-99	0	3	0	0	7	0	0	-9	4	-99	0	-99	-99
201503240036	2015	3	24	1	1	1	1	0	0	153	6	26.073483	62.720516	0	6	0	0	0	13	0	0	0	0	0	0	0	3	25	153	0	0	0	0	0	0	4	0	0	0	0	0	0	0	0	4	-99	1	1	0
201503240038	2015	3	24	0	1	1	0	1	0	4	6	33.68849	68.401881	0	3	0	0	0	6	16	0	0	0	0	0	0	4	34	4	0	0	0	0	0	0	-99	0	2	0	0	0	0	0	0	4	-99	0	-99	-99
201503240044	2015	3	24	0	1	1	1	1	0	113	10	32.069286	20.151144	0	3	0	0	0	6	11	0	0	0	0	0	0	14	76	113	0	0	0	0	0	0	-99	0	2	0	0	3	0	0	1	3	-99	0	-99	-99
201503240054	2015	3	24	0	1	1	1	0	0	603	8	54.607712	-5.95621	0	3	0	0	0	6	31	0	0	0	0	0	0	14	76	233	0	0	0	0	0	0	-99	0	0	0	0	0	0	0	0	4	-99	0	-99	-99
201503240061	2015	3	24	0	1	1	1	0	0	95	10	33.74324	44.623825	0	3	0	0	0	6	16	0	0	0	0	0	0	14	73	95	0	0	0	0	0	0	-99	0	1	0	0	0	0	0	1	3	-99	0	-99	-99
201503240064	2015	3	24	0	1	1	1	0	0	153	6	32.320237	69.859741	0	3	0	0	0	6	8	0	0	0	0	0	0	4	39	153	14	67	153	0	0	0	-99	0	2	0	0	3	0	0	1	3	-99	0	-99	-99
201503240065	2015	3	24	0	1	1	0	1	0	60	10	30.608472	33.617577	0	3	0	0	0	6	16	0	0	0	0	0	0	4	34	60	0	0	0	0	0	0	-99	0	0	0	0	0	0	0	0	4	-99	0	-99	-99
201503240071	2015	3	24	0	1	1	0	1	0	214	9	49.377778	40.130556	0	3	0	0	0	6	11	0	0	0	0	0	0	4	35	214	0	0	0	0	0	0	-99	0	0	0	0	0	0	0	1	3	-99	0	-99	-99
201503240075	2015	3	24	0	1	1	1	0	0	153	6	31.50547	74.34288	0	2	0	0	0	5	5	0	0	0	0	0	0	3	25	153	15	86	153	0	0	0	2	0	0	0	0	2	0	0	-9	4	-99	0	-99	-99
201503240076	2015	3	24	0	1	1	1	0	0	153	6	34.496522	73.015815	0	2	0	0	0	5	5	0	0	0	0	0	0	2	20	153	0	0	0	0	0	0	1	0	1	0	0	0	0	0	1	3	-99	0	-99	-99
201503240093	2015	3	24	0	1	1	1	0	0	153	6	33.474722	71.4875	0	3	0	0	0	6	7	0	0	0	0	0	0	14	79	153	0	0	0	0	0	0	-99	0	0	0	0	0	0	0	0	4	-99	0	-99	-99
201503240097	2015	3	24	0	1	1	1	0	0	110	10	34.034916	36.227844	0	2	0	0	0	5	5	0	0	0	0	0	0	1	2	110	14	68	200	0	0	0	-99	0	1	0	0	0	0	0	1	3	-99	0	-99	-99
201503250001	2015	3	25	0	1	1	1	0	0	113	10	32.760422	22.635265	0	9	0	0	0	13	0	0	0	0	0	0	0	8	49	113	0	0	0	0	0	0	-99	0	0	0	0	0	0	0	-9	4	-99	0	-99	-99
201503250020	2015	3	25	0	1	1	1	0	0	95	10	33.860725	44.683872	0	3	0	0	0	6	16	0	0	0	0	0	0	14	76	95	0	0	0	0	0	0	-99	0	1	0	0	0	0	0	-9	4	-99	0	-99	-99
201503250024	2015	3	25	0	1	1	1	0	0	4	6	34.516895	69.147011	0	3	0	0	1	6	15	0	0	0	0	0	0	3	25	4	14	67	4	0	0	0	1	0	8	0	1	22	0	0	1	3	-99	0	-99	-99
201503250035	2015	3	25	0	1	1	1	0	0	123	11	18.442701	1.411332	0	3	0	0	0	6	17	0	0	0	0	0	0	7	47	422	0	0	0	0	0	0	-99	0	0	0	0	1	0	0	1	3	-99	0	-99	-99
201503250036	2015	3	25	0	1	1	1	0	0	60	10	29.311707	30.838812	0	3	0	0	0	6	17	0	0	0	0	0	0	8	49	60	0	0	0	0	0	0	-99	0	1	0	0	0	0	0	0	4	-99	0	-99	-99
201503250037	2015	3	25	0	1	1	1	0	0	60	10	30.022924	31.185192	0	2	0	0	0	5	3	0	0	0	0	0	0	7	46	229	3	25	60	0	0	0	3	2	0	0	0	2	0	0	0	4	-99	0	-99	-99
201503250038	2015	3	25	0	1	1	1	0	0	214	9	48.596962	37.998299	0	3	0	0	0	6	8	0	0	0	0	0	0	19	99	214	0	0	0	0	0	0	-99	0	3	0	0	6	0	0	1	3	-99	0	-99	-99
201503250043	2015	3	25	0	1	1	1	0	0	101	4	35.689125	139.747742	0	7	0	0	0	8	18	0	0	0	0	0	0	7	46	184	0	0	0	0	0	0	1	0	0	0	0	0	0	0	1	3	-99	0	-99	-99
201503250045	2015	3	25	0	1	1	0	1	0	153	6	33.423333	70.368889	0	3	0	0	0	6	16	0	0	0	0	0	0	4	35	153	0	0	0	0	0	0	-99	0	1	0	0	0	0	0	1	4	-99	0	-99	-99
201503250049	2015	3	25	0	1	1	0	1	0	138	5	22.933292	97.75	0	2	0	0	0	6	11	5	5	0	0	0	0	4	27	138	0	0	0	0	0	0	-99	0	0	0	0	0	0	0	1	3	-99	0	-99	-99
201503250069	2015	3	25	0	1	1	1	0	0	92	6	25.903798	93.740234	0	3	0	0	0	6	16	0	0	0	0	0	0	1	8	92	0	0	0	0	0	0	-99	0	0	0	0	0	0	0	0	4	-99	0	-99	-99
201503250070	2015	3	25	0	1	1	1	0	0	69	8	50.420096	2.94722	0	7	0	0	0	8	18	0	0	0	0	0	0	2	21	69	0	0	0	0	0	0	-99	0	0	0	0	0	0	0	1	3	-99	0	-99	-99
201503250081	2015	3	25	0	1	1	1	0	0	155	10	31.530243	35.094162	0	3	0	0	0	6	31	0	0	0	0	0	0	3	22	97	0	0	0	0	0	0	-99	0	0	0	0	0	0	0	0	4	-99	0	-99	-99
201503250082	2015	3	25	0	1	1	1	0	0	195	11	13.633333	24.966667	0	2	0	0	0	5	5	0	0	0	0	0	0	14	72	195	0	0	0	0	0	0	8	0	7	0	1	2	0	0	0	4	-99	0	-99	-99
201503250086	2015	3	25	0	1	1	1	0	0	147	11	11.280235	7.417553	0	7	0	0	0	8	18	0	0	0	0	0	0	15	87	147	0	0	0	0	0	0	-99	0	0	0	0	0	0	0	1	3	-99	0	-99	-99
201503250087	2015	3	25	0	1	1	0	1	0	60	10	31.250196	34.24128	0	3	0	0	0	6	16	0	0	0	0	0	0	4	35	60	0	0	0	0	0	0	-99	0	0	0	0	4	0	0	-9	4	-99	0	-99	-99
201503250088	2015	3	25	0	1	1	1	0	0	60	10	31.126646	33.800865	0	3	0	0	0	6	16	0	0	0	0	0	0	20	0	60	0	0	0	0	0	0	-99	0	0	0	0	0	0	0	0	4	-99	0	-99	-99
201503250089	2015	3	25	0	1	1	1	0	0	60	10	31.250196	34.24128	0	3	0	0	0	6	16	0	0	0	0	0	0	20	0	60	0	0	0	0	0	0	-99	0	0	0	0	0	0	0	0	4	-99	0	-99	-99
201503250090	2015	3	25	0	1	1	1	0	0	60	10	31.212225	34.117065	0	3	0	0	0	6	16	0	0	0	0	0	0	20	0	60	0	0	0	0	0	0	-99	0	0	0	0	0	0	0	0	4	-99	0	-99	-99
201503260004	2015	3	26	0	1	1	1	0	0	95	10	33.303566	44.371773	0	3	0	0	0	6	16	0	0	0	0	0	0	14	67	95	0	0	0	0	0	0	-99	0	2	0	0	5	0	0	0	4	-99	0	-99	-99
201503260005	2015	3	26	0	1	1	1	0	0	95	10	33.31065	44.038208	0	3	0	0	0	6	16	0	0	0	0	0	0	14	67	95	0	0	0	0	0	0	-99	0	1	0	0	1	0	0	0	4	-99	0	-99	-99
201503260006	2015	3	26	0	1	1	1	0	0	95	10	33.792778	44.605556	0	2	0	0	0	5	2	0	0	0	0	0	0	14	73	95	0	0	0	0	0	0	-99	0	1	0	0	2	0	0	1	3	-99	0	-99	-99
201503260007	2015	3	26	0	1	1	1	0	0	95	10	33.28	44.51958	0	2	0	0	0	5	5	0	0	0	0	0	0	2	18	95	0	0	0	0	0	0	-99	0	1	0	0	2	0	0	1	3	-99	0	-99	-99
201503260008	2015	3	26	0	1	1	1	0	0	95	10	33.953167	44.921906	0	1	0	0	0	5	5	0	0	0	0	0	0	2	15	95	0	0	0	0	0	0	-99	0	1	0	0	0	0	0	1	3	-99	0	-99	-99
201503260009	2015	3	26	0	1	1	1	0	0	153	6	30.475091	69.365678	0	2	0	0	0	5	5	0	0	0	0	0	0	3	25	153	0	0	0	0	0	0	-99	0	1	0	0	0	0	0	0	4	-99	0	-99	-99
201503260011	2015	3	26	0	1	1	1	0	0	153	6	30.366743	68.600175	0	3	0	0	0	6	11	0	0	0	0	0	0	3	22	153	0	0	0	0	0	0	-99	0	0	0	0	0	0	0	1	3	-99	0	-99	-99
201503260013	2015	3	26	0	1	1	1	0	0	95	10	33.303566	44.371773	0	3	0	0	0	6	29	0	0	0	0	0	0	19	99	95	0	0	0	0	0	0	-99	0	1	0	0	7	0	0	1	3	-99	0	-99	-99
201503260023	2015	3	26	0	1	1	1	0	0	4	6	36.705776	68.87706	0	3	0	0	0	6	29	0	0	0	0	0	0	3	23	4	14	67	4	0	0	0	-99	0	0	0	0	3	0	0	1	3	-99	0	-99	-99
201503260029	2015	3	26	0	1	1	1	0	0	160	5	15.366667	120.966667	0	1	0	0	0	5	5	0	0	0	0	0	0	2	15	160	0	0	0	0	0	0	1	0	0	0	0	2	0	0	1	3	-99	0	-99	-99
201503260031	2015	3	26	0	1	1	1	0	0	19	6	23.576205	88.652079	0	3	0	0	0	6	17	0	0	0	0	0	0	3	23	19	0	0	0	0	0	0	-99	0	0	0	0	0	0	0	0	4	-99	0	-99	-99
201503260033	2015	3	26	0	1	1	1	1	0	4	6	33.421827	68.578186	0	3	0	0	0	6	11	0	0	0	0	0	0	14	76	4	0	0	0	0	0	0	-99	0	2	0	0	5	0	0	1	3	-99	0	-99	-99
201503260038	2015	3	26	0	1	1	1	0	0	19	6	25.598137	89.363039	0	3	0	0	0	6	17	0	0	0	0	0	0	14	68	19	0	0	0	0	0	0	2	0	1	0	0	0	0	0	-9	4	-99	0	-99	-99
201503260054	2015	3	26	0	1	1	1	0	1	153	6	34.103279	71.796265	1	3	0	0	0	6	29	0	0	0	0	0	0	21	107	153	0	0	0	0	0	0	-99	0	0	0	0	0	0	0	1	4	-99	0	-99	-99
201503260055	2015	3	26	0	1	1	1	0	1	153	6	34.103279	71.796265	1	3	0	0	0	6	29	0	0	0	0	0	0	21	107	153	0	0	0	0	0	0	-99	0	0	0	0	0	0	0	1	4	-99	0	-99	-99
201503260056	2015	3	26	0	1	1	1	0	1	153	6	34.103279	71.796265	1	3	0	0	0	6	29	0	0	0	0	0	0	21	107	153	0	0	0	0	0	0	-99	0	0	0	0	0	0	0	1	4	-99	0	-99	-99
201503260060	2015	3	26	0	1	1	1	0	0	200	10	36.503593	40.740627	0	3	0	0	1	6	15	0	0	0	0	0	0	3	25	200	0	0	0	0	0	0	-99	0	2	0	1	0	0	0	0	4	-99	0	-99	-99
201503260063	2015	3	26	0	1	1	1	0	0	60	10	29.966834	32.549807	0	2	0	0	0	5	5	0	0	0	0	0	0	3	24	60	0	0	0	0	0	0	4	0	2	0	1	0	0	0	0	4	-99	0	-99	-99
201503270006	2015	3	27	0	1	1	1	0	0	95	10	33.460819	44.157433	0	3	0	0	0	6	16	0	0	0	0	0	0	14	67	95	0	0	0	0	0	0	-99	0	0	0	0	2	0	0	0	4	-99	0	-99	-99
201503270009	2015	3	27	0	1	1	1	0	0	95	10	33.303566	44.371773	0	3	0	0	0	6	16	0	0	0	0	0	0	1	7	95	0	0	0	0	0	0	-99	0	2	0	0	6	0	0	-9	4	-99	0	-99	-99
201503270017	2015	3	27	0	1	1	0	1	0	228	10	13.634756	46.057217	0	3	0	0	0	6	11	0	0	0	0	0	0	4	35	228	0	0	0	0	0	0	-99	0	4	0	0	0	0	0	1	3	-99	0	-99	-99
201503270021	2015	3	27	0	1	1	1	0	0	182	11	2.059819	45.326115	0	3	0	0	0	6	15	0	0	0	0	0	0	20	0	0	0	0	0	0	0	0	1	1	0	0	0	0	0	0	0	4	-99	0	-99	-99
201503270024	2015	3	27	0	1	1	1	0	0	92	6	34.288891	74.463715	0	2	0	0	0	5	5	0	0	0	0	0	0	3	25	92	0	0	0	0	0	0	-99	0	0	0	0	0	0	0	0	4	-99	0	-99	-99
201503270026	2015	3	27	0	1	1	1	0	0	153	6	34.007206	71.983078	0	1	0	0	0	5	5	0	0	0	0	0	0	15	85	153	0	0	0	0	0	0	-99	0	1	0	0	0	0	0	1	3	-99	0	-99	-99
201503270028	2015	3	27	0	1	1	0	1	0	153	6	32.320237	69.859741	0	3	0	0	0	6	8	0	0	0	0	0	0	4	35	153	0	0	0	0	0	0	-99	0	2	0	0	2	0	0	1	4	-99	0	-99	-99
201503270030	2015	3	27	0	1	1	1	0	0	153	6	32.940556	70.658333	1	2	0	0	0	5	5	0	0	0	0	0	0	2	20	153	0	0	0	0	0	0	-99	0	1	0	0	1	0	0	1	3	-99	0	-99	-99
201503270048	2015	3	27	0	1	1	0	1	0	200	10	33.070843	36.182793	0	3	0	0	0	6	11	0	0	0	0	0	0	4	31	0	0	0	0	0	0	0	-99	0	0	0	0	0	0	0	1	4	-99	0	-99	-99
201503270050	2015	3	27	0	1	1	1	0	0	222	3	9.640122	-63.670547	0	7	0	0	0	13	0	0	0	0	0	0	0	1	1	222	0	0	0	0	0	0	-99	0	0	0	0	0	0	0	1	3	-99	0	-99	-99
201503270052	2015	3	27	0	1	1	0	1	0	60	10	31.125883	33.820059	0	3	0	0	0	6	16	0	0	0	0	0	0	4	34	60	0	0	0	0	0	0	-99	0	1	0	1	0	0	0	0	4	-99	0	-99	-99
201503270053	2015	3	27	0	1	1	1	0	0	60	10	31.126646	33.800865	0	3	0	0	0	6	16	0	0	0	0	0	0	20	0	60	0	0	0	0	0	0	-99	0	0	0	0	0	0	0	0	4	-99	0	-99	-99
201503280003	2015	3	28	0	1	1	1	0	1	95	10	33.953167	44.921906	0	3	0	0	0	6	16	0	0	0	0	0	0	14	76	95	0	0	0	0	0	0	-99	0	0	0	0	0	0	0	1	3	-99	0	-99	-99
201503280004	2015	3	28	0	1	1	1	0	1	95	10	33.953167	44.921906	0	3	0	0	0	6	16	0	0	0	0	0	0	14	76	95	0	0	0	0	0	0	-99	0	0	0	0	0	0	0	1	3	-99	0	-99	-99
201503280011	2015	3	28	0	1	1	1	0	0	95	10	33.057991	44.354839	0	3	0	0	0	6	16	0	0	0	0	0	0	14	74	95	0	0	0	0	0	0	-99	0	3	0	0	7	0	0	-9	4	-99	0	-99	-99
201503280042	2015	3	28	0	1	1	1	0	0	147	11	6.452667	7.510333	0	3	0	0	0	6	15	0	0	0	0	0	0	2	19	147	0	0	0	0	0	0	-99	0	0	0	0	0	0	0	1	3	-99	0	-99	-99
201503280046	2015	3	28	0	1	1	0	1	0	147	11	4.815554	7.049844	0	2	0	0	0	5	5	0	0	0	0	0	0	4	34	147	0	0	0	0	0	0	-99	0	1	0	0	0	0	0	0	4	-99	0	-99	-99
201503280049	2015	3	28	0	1	1	1	0	0	147	11	6.217015	7.087067	0	3	0	0	0	6	16	0	0	0	0	0	0	2	19	147	0	0	0	0	0	0	-99	0	0	0	0	0	0	0	1	3	-99	0	-99	-99
201503280058	2015	3	28	0	1	1	1	0	0	60	10	31.126646	33.800865	0	2	0	0	0	5	5	0	0	0	0	0	0	3	24	60	14	67	60	0	0	0	-99	0	1	0	0	0	0	0	0	4	-99	0	-99	-99
201503280059	2015	3	28	0	1	1	1	0	1	4	6	32.100204	66.901016	0	3	0	0	0	6	16	0	0	0	0	0	0	3	25	4	0	0	0	0	0	0	-99	0	0	0	0	1	0	0	0	4	-99	0	-99	-99
201503280060	2015	3	28	0	1	1	1	0	1	4	6	31.80262	66.324715	0	3	0	0	0	6	16	0	0	0	0	0	0	3	25	4	0	0	0	0	0	0	-99	0	0	0	0	4	0	0	0	4	-99	0	-99	-99
201503290001	2015	3	29	0	1	1	1	0	0	113	10	32.760422	22.635265	0	3	0	0	0	6	16	0	0	0	0	0	0	8	49	113	0	0	0	0	0	0	-99	0	0	0	0	3	0	0	1	3	-99	0	-99	-99
201503290006	2015	3	29	0	1	1	1	0	0	95	10	33.19392	44.408577	0	3	0	0	0	6	16	0	0	0	0	0	0	17	94	95	0	0	0	0	0	0	-99	0	2	0	0	6	0	0	0	4	-99	0	-99	-99
201503290007	2015	3	29	0	1	1	1	0	0	95	10	33.31065	44.038208	0	3	0	0	0	6	16	0	0	0	0	0	0	1	7	95	0	0	0	0	0	0	-99	0	1	0	0	8	0	0	-9	4	-99	0	-99	-99
201503290009	2015	3	29	0	1	1	1	0	0	4	6	34.516895	69.147011	0	1	0	0	1	6	13	0	0	0	0	0	0	2	15	4	14	67	4	0	0	0	1	0	4	0	1	8	0	0	1	3	-99	0	-99	-99
201503290013	2015	3	29	0	1	1	1	0	0	4	6	36.70993	67.1157	0	2	0	0	0	5	5	0	0	0	0	0	0	2	18	4	0	0	0	0	0	0	-99	0	1	0	0	0	0	0	0	4	-99	0	-99	-99
201503290015	2015	3	29	1	1	1	1	0	0	4	6	34.021194	68.999535	0	1	6	0	0	13	0	0	0	0	0	0	0	3	25	4	0	0	0	0	0	0	-99	0	1	0	0	0	0	0	1	3	-99	1	2	0
201503290022	2015	3	29	0	1	1	1	0	0	153	6	34.814444	71.774167	0	3	0	0	0	6	12	0	0	0	0	0	0	1	7	153	0	0	0	0	0	0	-99	0	0	0	0	0	0	0	1	4	-99	0	-99	-99
201503290023	2015	3	29	0	1	1	1	0	0	153	6	28.249103	69.192335	0	3	2	0	0	6	16	5	5	0	0	0	0	21	106	153	0	0	0	0	0	0	2	2	0	0	0	2	0	2	0	4	-99	0	-99	-99
201503290028	2015	3	29	0	1	1	1	0	0	160	5	8.05	126.066667	0	7	0	0	0	8	18	0	0	0	0	0	0	1	5	160	0	0	0	0	0	0	30	0	0	0	0	0	0	0	1	3	15000	0	-99	-99
201503290040	2015	3	29	0	1	1	1	0	1	147	11	10.394167	10.532222	0	2	7	0	0	5	5	13	0	0	0	0	0	2	19	147	0	0	0	0	0	0	-99	0	0	0	0	0	0	0	1	3	-99	0	-99	-99
201503290041	2015	3	29	0	1	1	1	0	1	147	11	10.394167	10.532222	0	2	7	0	0	5	5	13	0	0	0	0	0	3	22	147	0	0	0	0	0	0	-99	0	0	0	0	0	0	0	1	3	-99	0	-99	-99
201503290042	2015	3	29	0	1	1	1	0	1	147	11	10.271304	10.330143	0	2	7	0	0	5	5	13	0	0	0	0	0	2	19	147	0	0	0	0	0	0	-99	0	0	0	0	0	0	0	1	3	-99	0	-99	-99
201503290043	2015	3	29	0	1	1	1	0	1	147	11	10.271304	10.330143	0	2	7	0	0	5	5	13	0	0	0	0	0	3	22	147	0	0	0	0	0	0	-99	0	0	0	0	0	0	0	1	3	-99	0	-99	-99
201503290045	2015	3	29	0	1	1	1	0	0	147	11	4.815554	7.049844	0	3	0	0	0	6	16	0	0	0	0	0	0	2	19	147	0	0	0	0	0	0	-99	0	0	0	0	0	0	0	1	3	-99	0	-99	-99
201503290046	2015	3	29	0	1	1	1	0	0	147	11	6.091852	6.757429	0	3	0	0	0	6	28	0	0	0	0	0	0	2	19	147	0	0	0	0	0	0	-99	0	0	0	0	0	0	0	1	3	-99	0	-99	-99
201503290048	2015	3	29	0	1	1	1	0	0	147	11	7.766313	4.566846	0	1	0	0	0	5	5	0	0	0	0	0	0	22	109	147	0	0	0	0	0	0	-99	0	0	0	0	0	0	0	1	3	-99	0	-99	-99
201503300002	2015	3	30	0	1	1	1	0	0	95	10	35.45211	44.375465	0	3	0	0	0	6	15	0	0	0	0	0	0	19	105	95	0	0	0	0	0	0	-99	0	1	0	0	0	0	0	1	3	-99	0	-99	-99
201503300003	2015	3	30	0	1	1	1	0	0	95	10	33.07835	44.254719	0	3	0	0	0	6	16	0	0	0	0	0	0	3	23	95	0	0	0	0	0	0	-99	0	0	0	0	4	0	0	0	4	-99	0	-99	-99
201503300005	2015	3	30	0	1	1	1	0	0	95	10	33.548306	44.415733	0	3	0	0	1	6	15	0	0	0	0	0	0	3	24	95	14	74	95	0	0	0	-99	0	6	0	1	18	0	0	1	3	-99	0	-99	-99
201503300012	2015	3	30	0	1	1	1	0	0	95	10	34.621521	43.668377	0	3	0	0	0	6	16	0	0	0	0	0	0	20	0	95	0	0	0	0	0	0	-99	0	0	0	0	0	0	0	0	4	-99	0	-99	-99
201503300018	2015	3	30	0	1	1	1	0	0	153	6	30.370974	68.599319	0	3	0	0	0	6	11	0	0	0	0	0	0	3	22	153	0	0	0	0	0	0	-99	0	0	0	0	0	0	0	1	3	-99	0	-99	-99
201503300023	2015	3	30	0	1	1	1	0	0	205	5	6.394265	101.536173	1	3	0	0	0	6	17	0	0	0	0	0	0	3	23	205	0	0	0	0	0	0	-99	0	0	0	0	2	0	0	0	4	-99	0	-99	-99
201503300026	2015	3	30	0	1	1	1	0	0	4	6	36.91693	68.54581	0	9	0	0	0	13	0	0	0	0	0	0	0	17	94	4	0	0	0	0	0	0	-99	0	6	0	5	12	0	11	0	4	-99	0	-99	-99
201503300028	2015	3	30	0	1	1	1	0	0	4	6	34.24178	70.183406	0	3	0	0	0	6	16	0	0	0	0	0	0	3	22	4	0	0	0	0	0	0	-99	0	2	0	0	5	0	0	-9	4	-99	0	-99	-99
201503300047	2015	3	30	0	1	1	1	0	0	153	6	24.891115	67.143311	0	2	0	0	0	5	3	0	0	0	0	0	0	3	22	153	0	0	0	0	0	0	3	0	2	0	0	0	0	0	-9	4	-99	0	-99	-99
201503300048	2015	3	30	0	1	1	1	0	0	153	6	34.489722	72.960556	0	2	0	0	0	5	5	0	0	0	0	0	0	3	25	153	0	0	0	0	0	0	-99	0	1	0	0	1	0	0	1	3	-99	0	-99	-99
201503300049	2015	3	30	0	1	1	0	1	0	182	11	1.716188	44.768864	0	3	0	0	0	6	8	0	0	0	0	0	0	4	29	422	0	0	0	0	0	0	-99	0	2	0	0	0	0	0	1	4	-99	0	-99	-99
201503300053	2015	3	30	0	1	1	1	0	0	228	10	13.718985	44.734337	0	2	0	0	0	5	5	0	0	0	0	0	0	12	62	422	0	0	0	0	0	0	-99	0	1	0	0	0	0	0	0	4	-99	0	-99	-99
201503300056	2015	3	30	0	1	1	1	0	0	214	9	49.933791	36.242275	0	3	0	0	0	6	16	0	0	0	0	0	0	19	100	214	0	0	0	0	0	0	-99	0	0	0	0	0	0	0	1	4	-99	0	-99	-99
201503300068	2015	3	30	0	1	1	1	0	0	147	11	5.636518	5.964841	0	7	0	0	0	8	18	0	0	0	0	0	0	2	19	147	0	0	0	0	0	0	-99	0	0	0	0	0	0	0	1	3	-99	0	-99	-99
201503300076	2015	3	30	0	1	1	1	0	0	603	8	55.131653	-6.67137	0	3	0	0	0	6	7	0	0	0	0	0	0	14	76	233	0	0	0	0	0	0	-99	0	0	0	0	0	0	0	0	4	-99	0	-99	-99
201503300081	2015	3	30	0	1	1	0	1	0	160	5	8.123819	123.434066	0	2	0	0	0	5	5	0	0	0	0	0	0	4	34	160	0	0	0	0	0	0	-99	0	1	0	0	0	0	0	0	4	-99	0	-99	-99
201503300083	2015	3	30	0	1	1	1	0	1	14	12	-37.898215	144.995554	0	7	0	0	0	8	18	0	0	0	0	0	0	15	86	14	0	0	0	0	0	0	-99	0	0	0	0	0	0	0	1	3	-99	0	-99	-99
201503300084	2015	3	30	0	1	1	1	0	1	14	12	-37.858684	144.996338	0	7	0	0	0	8	18	0	0	0	0	0	0	15	86	14	0	0	0	0	0	0	-99	0	0	0	0	0	0	0	1	3	-99	0	-99	-99
201503310001	2015	3	31	0	1	1	1	0	0	200	10	32.568889	36.315278	0	3	0	0	0	6	15	0	0	0	0	0	0	14	67	200	0	0	0	0	0	0	-99	0	14	0	0	0	0	0	-9	4	-99	0	-99	-99
201503310002	2015	3	31	0	1	1	1	0	0	95	10	33.303566	44.371773	0	3	0	0	0	6	16	0	0	0	0	0	0	1	2	95	0	0	0	0	0	0	-99	0	3	0	0	6	0	0	-9	4	-99	0	-99	-99
201503310003	2015	3	31	0	1	1	1	0	0	95	10	33.303566	44.371773	0	3	0	0	0	6	16	0	0	0	0	0	0	1	7	95	0	0	0	0	0	0	-99	0	1	0	0	7	0	0	-9	4	-99	0	-99	-99
201503310005	2015	3	31	0	1	1	1	0	0	4	6	31.631083	65.742226	0	3	0	0	0	6	12	0	0	0	0	0	0	8	49	4	0	0	0	0	0	0	-99	0	0	0	0	1	0	0	-9	4	-99	0	-99	-99
201503310017	2015	3	31	0	1	1	1	0	0	153	6	28.633307	69.190369	1	3	0	0	0	6	16	0	0	0	0	0	0	20	0	153	0	0	0	0	0	0	-99	0	0	0	0	0	0	0	0	4	-99	0	-99	-99
201503310018	2015	3	31	0	1	1	1	0	0	153	6	30.200819	66.994354	0	3	0	0	0	6	7	0	0	0	0	0	0	20	0	153	0	0	0	0	0	0	-99	0	0	0	0	0	0	0	0	4	-99	0	-99	-99
201503310021	2015	3	31	0	1	1	1	0	0	214	9	49.933791	36.242275	0	3	0	0	0	6	16	0	0	0	0	0	0	19	100	214	0	0	0	0	0	0	-99	0	0	0	0	0	0	0	1	4	-99	0	-99	-99
201503310048	2015	3	31	0	1	1	1	0	0	92	6	24.798346	93.94043	0	3	0	0	0	6	16	0	0	0	0	0	0	2	18	92	0	0	0	0	0	0	1	0	0	0	0	0	0	0	1	3	-99	0	-99	-99
201503310049	2015	3	31	0	1	1	1	0	0	214	9	48.442791	35.02216	1	3	0	0	0	6	17	0	0	0	0	0	0	19	100	214	0	0	0	0	0	0	-99	0	0	0	0	0	0	0	0	4	-99	0	-99	-99
201503310050	2015	3	31	1	1	1	1	0	0	113	10	32.867867	13.189067	0	6	0	0	0	5	5	0	0	0	0	0	0	14	82	200	0	0	0	0	0	0	-99	0	0	0	0	0	0	0	0	4	-99	1	1	0
201503310055	2015	3	31	0	1	1	1	0	0	60	10	29.691005	33.8657	0	3	0	0	0	6	8	0	0	0	0	0	0	14	67	60	0	0	0	0	0	0	-99	0	0	0	0	1	0	0	0	4	-99	0	-99	-99
201503310056	2015	3	31	0	1	1	0	1	0	60	10	30.543211	33.639568	0	3	0	0	0	6	16	0	0	0	0	0	0	4	34	60	0	0	0	0	0	0	6	0	0	0	0	6	0	6	0	4	-99	0	-99	-99
201504010002	2015	4	1	0	1	1	1	0	0	95	10	33.303566	44.371773	0	3	0	0	0	6	16	0	0	0	0	0	0	14	67	95	0	0	0	0	0	0	-99	0	2	0	0	7	0	0	-9	4	-99	0	-99	-99
201504010007	2015	4	1	0	1	1	0	1	0	153	6	33.787371	70.707922	0	3	0	0	0	6	16	0	0	0	0	0	0	4	27	153	0	0	0	0	0	0	-99	0	2	0	0	0	0	0	0	4	-99	0	-99	-99
201504010008	2015	3	31	0	1	1	1	0	0	153	6	32.209583	70.387998	0	1	0	0	0	5	2	0	0	0	0	0	0	17	94	153	0	0	0	0	0	0	-99	0	1	0	0	2	0	0	1	3	-99	0	-99	-99
201504010032	2015	4	1	0	1	1	1	0	0	4	6	34.31054	62.316639	0	3	0	0	1	6	13	0	0	0	0	0	0	14	67	4	0	0	0	0	0	0	1	0	1	0	1	1	0	0	0	4	-99	0	-99	-99
201504010042	2015	4	1	0	1	1	1	0	0	153	6	33.515574	71.513294	0	3	0	0	0	6	17	0	0	0	0	0	0	14	68	153	0	0	0	0	0	0	-99	0	0	0	0	3	0	0	1	3	-99	0	-99	-99
201504010049	2015	4	1	0	1	1	0	1	0	60	10	29.257506	31.200826	1	2	0	0	0	5	4	0	0	0	0	0	0	4	35	60	0	0	0	0	0	0	-99	0	0	0	0	3	0	0	0	4	-99	0	-99	-99
201504010054	2015	4	1	0	0	1	1	1	0	147	11	7.620925	5.221272	0	2	0	0	0	5	2	9	23	0	0	0	0	14	84	147	0	0	0	0	0	0	-99	0	0	0	0	0	0	0	1	3	-99	0	-99	-99
201504010057	2015	4	1	0	1	1	1	0	0	4	6	34.277465	69.828247	0	1	0	0	0	6	8	0	0	0	0	0	0	3	25	4	0	0	0	0	0	0	-99	0	1	0	0	0	0	0	0	4	-99	0	-99	-99
201504010059	2015	4	1	0	1	1	1	0	0	113	10	32.867867	13.189067	0	2	0	0	0	5	5	0	0	0	0	0	0	3	23	113	0	0	0	0	0	0	-99	0	1	0	0	3	0	0	0	4	-99	0	-99	-99
201504010080	2015	4	1	0	1	1	1	0	0	209	10	41.106178	28.689863	0	2	0	0	0	5	5	0	0	0	0	0	0	14	84	209	0	0	0	0	0	0	1	1	0	0	0	0	0	0	1	3	-99	0	-99	-99
201504010081	2015	4	1	1	1	1	1	0	0	147	11	4.538283	7.869569	0	6	0	0	0	5	5	0	0	0	0	0	0	1	1	147	0	0	0	0	0	0	-99	0	0	0	0	0	0	0	0	4	-99	1	5	0
201504010083	2015	4	1	1	1	1	1	0	0	1004	11	9.908906	31.890913	0	6	0	0	0	13	0	0	0	0	0	0	0	7	47	422	0	0	0	0	0	0	-99	0	0	0	0	0	0	0	0	4	-99	1	3	0
201504010084	2015	4	1	0	1	1	1	0	0	92	6	24.749962	93.385499	0	2	0	0	0	5	5	0	0	0	0	0	0	1	7	92	0	0	0	0	0	0	-99	0	0	0	0	1	0	0	1	3	1560.31	0	-99	-99
201504010109	2015	4	1	0	1	1	1	0	0	60	10	31.211786	34.151035	0	3	0	0	0	6	11	0	0	0	0	0	0	4	27	60	14	76	60	0	0	0	-99	0	1	0	0	3	0	0	1	3	-99	0	-99	-99
201504010111	2015	4	1	1	1	1	1	0	0	60	10	31.212225	34.117065	0	6	0	0	0	5	5	0	0	0	0	0	0	14	113	60	0	0	0	0	0	0	-99	0	0	0	0	0	0	0	0	4	-99	1	3	0
201504010112	2015	4	1	0	1	1	1	0	0	14	12	-37.988975	145.217452	0	7	0	0	0	8	18	0	0	0	0	0	0	15	86	14	0	0	0	0	0	0	-99	0	0	0	0	0	0	0	1	3	-99	0	-99	-99
201504020012	2015	4	2	0	1	1	1	0	0	60	10	31.126646	33.800865	1	3	0	0	0	6	11	0	0	0	0	0	0	14	76	60	0	0	0	0	0	0	-99	0	0	0	0	3	0	0	1	3	-99	0	-99	-99
201504020013	2015	4	2	0	1	1	1	0	0	60	10	30.727675	31.724866	0	3	0	0	0	6	16	0	0	0	0	0	0	21	107	60	0	0	0	0	0	0	-99	0	0	0	0	0	0	0	0	4	-99	0	-99	-99
201504020020	2015	4	2	0	1	1	1	0	0	95	10	33.057991	44.354839	0	3	0	0	0	6	16	0	0	0	0	0	0	14	67	95	0	0	0	0	0	0	-99	0	2	0	0	6	0	0	-9	4	-99	0	-99	-99
201504020021	2015	4	2	0	1	1	1	0	0	95	10	33.926586	44.772064	0	3	0	0	0	6	16	0	0	0	0	0	0	20	0	95	0	0	0	0	0	0	-99	0	0	0	0	0	0	0	0	4	-99	0	-99	-99
201504020022	2015	4	2	0	1	1	1	0	0	95	10	33.548306	44.415733	0	3	0	0	0	6	16	0	0	0	0	0	0	14	67	95	0	0	0	0	0	0	-99	0	3	0	0	7	0	0	-9	4	-99	0	-99	-99
201504020023	2015	4	2	0	1	1	1	0	0	95	10	33.303566	44.371773	0	3	0	0	0	6	16	0	0	0	0	0	0	14	67	95	0	0	0	0	0	0	-99	0	1	0	0	8	0	0	-9	4	-99	0	-99	-99
201504020027	2015	4	2	0	1	1	1	0	0	4	6	31.81376	64.632048	0	3	0	0	0	6	8	0	0	0	0	0	0	20	0	0	0	0	0	0	0	0	2	0	2	0	2	0	0	0	0	4	-99	0	-99	-99
201504020028	2015	4	2	0	1	1	1	0	0	4	6	31.467463	64.092445	0	3	0	0	0	6	8	6	16	0	0	0	0	20	0	0	0	0	0	0	0	0	-99	0	0	0	0	0	0	0	0	4	-99	0	-99	-99
201504020029	2015	4	2	0	1	1	1	0	0	4	6	31.402098	64.303047	0	3	0	0	0	6	8	6	16	0	0	0	0	20	0	0	0	0	0	0	0	0	-99	0	0	0	0	0	0	0	0	4	-99	0	-99	-99
201504020030	2015	4	2	0	1	1	1	0	0	4	6	32.134858	65.005053	0	3	0	0	0	6	8	6	16	0	0	0	0	20	0	0	0	0	0	0	0	0	-99	0	0	0	0	0	0	0	0	4	-99	0	-99	-99
201504020032	2015	4	2	0	1	1	1	0	1	214	9	50.443231	30.527218	0	3	0	0	0	6	17	0	0	0	0	0	0	1	3	167	0	0	0	0	0	0	-99	0	0	0	0	0	0	0	1	3	-99	0	-99	-99
201504020033	2015	4	2	0	1	1	1	0	1	214	9	50.443231	30.527218	0	3	0	0	0	6	17	0	0	0	0	0	0	1	3	167	0	0	0	0	0	0	-99	0	0	0	0	0	0	0	0	4	-99	0	-99	-99
201504020035	2015	4	2	0	1	1	1	0	0	4	6	37.447059	69.866145	0	3	0	0	0	6	8	0	0	0	0	0	0	14	67	4	0	0	0	0	0	0	-99	0	1	0	0	3	0	0	0	4	-99	0	-99	-99
201504020044	2015	4	1	0	1	1	1	0	0	153	6	29.143866	69.099785	0	3	0	0	0	6	16	0	0	0	0	0	0	20	0	153	0	0	0	0	0	0	-99	0	0	0	0	0	0	0	0	4	-99	0	-99	-99
201504020046	2015	4	2	0	1	1	1	0	0	92	6	34.199914	74.350496	0	2	0	0	0	5	5	0	0	0	0	0	0	4	29	92	14	67	92	0	0	0	3	0	2	0	0	1	0	0	0	4	-99	0	-99	-99
201504020049	2015	4	2	0	1	1	1	0	0	153	6	31.932722	70.460876	0	2	0	0	0	5	5	0	0	0	0	0	0	3	25	153	14	77	153	0	0	0	-99	0	0	0	0	1	0	0	0	4	-99	0	-99	-99
201504020050	2015	4	2	0	1	1	1	0	0	153	6	29.239351	70.838754	0	3	0	0	0	6	12	0	0	0	0	0	0	15	86	153	0	0	0	0	0	0	-99	1	0	0	0	0	0	0	0	4	-99	0	-99	-99
201504020058	2015	4	2	0	1	1	1	0	0	95	10	33.349159	43.784199	0	3	0	0	0	6	11	0	0	0	0	0	0	14	75	95	0	0	0	0	0	0	-99	0	2	0	0	4	0	0	-9	4	-99	0	-99	-99
201504020066	2015	4	2	0	1	1	1	0	0	110	10	34.438077	35.830869	0	3	0	0	0	6	17	0	0	0	0	0	0	14	74	110	0	0	0	0	0	0	1	0	0	0	0	2	0	0	1	3	-99	0	-99	-99
201504020069	2015	4	2	0	1	1	1	0	0	123	11	15.666816	0.508533	1	3	0	0	0	6	8	0	0	0	0	0	0	14	67	123	0	0	0	0	0	0	-99	0	1	0	0	1	0	0	-9	4	-99	0	-99	-99
201504020083	2015	4	2	0	1	1	1	0	0	160	5	8.229316	124.611832	0	3	0	0	0	6	7	0	0	0	0	0	0	14	77	160	0	0	0	0	0	0	-99	0	1	0	0	1	0	0	0	4	-99	0	-99	-99
201504020087	2015	4	2	0	1	1	1	0	1	4	6	33.514928	62.258535	0	7	0	0	0	8	18	0	0	0	0	0	0	16	90	4	0	0	0	0	0	0	-99	0	0	0	0	0	0	0	1	4	-99	0	-99	-99
201504020088	2015	4	2	0	1	1	1	0	1	4	6	33.514928	62.258535	0	7	0	0	0	8	18	0	0	0	0	0	0	16	90	4	0	0	0	0	0	0	-99	0	0	0	0	0	0	0	1	4	-99	0	-99	-99
201504020089	2015	4	2	0	1	1	1	0	1	4	6	33.514928	62.258535	0	7	0	0	0	8	18	0	0	0	0	0	0	16	90	4	0	0	0	0	0	0	-99	0	0	0	0	0	0	0	1	4	-99	0	-99	-99
201504020090	2015	4	2	0	1	1	1	0	0	92	6	17.140239	79.627321	0	2	0	0	0	5	5	0	0	0	0	0	0	3	25	92	14	73	92	0	0	0	2	0	0	0	0	1	0	0	1	3	-99	0	-99	-99
201504020091	2015	5	2	0	1	1	1	0	0	95	10	33.403057	43.911865	0	3	0	0	1	6	15	0	0	0	0	0	0	4	27	95	17	94	95	0	0	0	1	0	13	0	1	8	0	0	-9	4	-99	0	-99	-99
201504030002	2015	4	3	0	1	1	1	0	0	95	10	33.303566	44.371773	0	3	0	0	0	6	15	0	0	0	0	0	0	2	18	95	0	0	0	0	0	0	-99	0	1	0	0	0	0	0	1	3	-99	0	-99	-99
201504030003	2015	4	3	0	1	1	1	0	0	95	10	33.303566	44.371773	0	3	0	0	0	6	16	0	0	0	0	0	0	14	67	95	0	0	0	0	0	0	-99	0	2	0	0	7	0	0	0	4	-99	0	-99	-99
201504030004	2015	4	3	0	1	1	1	0	0	95	10	33.303566	44.371773	0	3	0	0	0	6	16	0	0	0	0	0	0	14	67	95	0	0	0	0	0	0	-99	0	2	0	0	9	0	0	-9	4	-99	0	-99	-99
201504030005	2015	4	3	0	1	1	1	0	0	95	10	33.07835	44.254719	0	3	0	0	0	6	16	0	0	0	0	0	0	3	23	95	0	0	0	0	0	0	-99	0	1	0	0	4	0	0	0	4	-99	0	-99	-99
201504030011	2015	4	3	0	1	1	1	0	0	4	6	31.76147	64.621428	0	3	0	0	1	6	15	0	0	0	0	0	0	20	0	0	0	0	0	0	0	0	1	0	1	0	1	0	0	0	0	4	-99	0	-99	-99
201504030022	2015	4	3	0	0	1	1	1	0	92	6	22.632176	88.35556	0	3	0	0	0	6	17	0	0	0	0	0	0	15	86	92	0	0	0	0	0	0	-99	0	0	0	0	0	0	0	1	3	-99	0	-99	-99
201504030050	2015	4	3	0	1	1	1	0	0	153	6	31.834328	70.90905	0	1	0	0	0	5	5	0	0	0	0	0	0	3	25	153	0	0	0	0	0	0	-99	0	2	0	0	0	0	0	1	3	-99	0	-99	-99
201504030068	2015	4	3	0	1	1	1	0	0	60	10	29.311707	30.838812	0	2	0	0	0	5	5	0	0	0	0	0	0	3	25	60	0	0	0	0	0	0	-99	0	1	0	0	0	0	0	0	4	-99	0	-99	-99
201504030072	2015	4	3	0	1	1	1	0	0	4	6	33.815519	68.364897	0	3	0	0	0	6	15	0	0	0	0	0	0	20	0	0	0	0	0	0	0	0	-99	0	0	0	0	0	0	0	0	4	-99	0	-99	-99
201504030074	2015	4	3	0	1	1	1	0	1	147	11	5.395256	6.668473	0	1	2	0	0	5	5	0	0	0	0	0	0	14	84	147	14	67	147	0	0	0	-99	0	5	0	0	1	0	0	0	4	-99	0	-99	-99
201504030075	2015	4	3	0	1	1	1	0	1	147	11	5.170767	6.515887	0	2	0	0	0	5	5	0	0	0	0	0	0	14	67	147	0	0	0	0	0	0	-99	0	4	0	0	1	0	0	0	4	-99	0	-99	-99
201504030076	2015	4	3	0	1	1	1	0	1	147	11	4.847445	6.930225	0	7	0	0	0	8	18	0	0	0	0	0	0	14	84	147	0	0	0	0	0	0	-99	0	0	0	0	0	0	0	1	3	-99	0	-99	-99
201504030079	2015	4	3	0	1	1	1	0	1	113	10	32.069286	20.151144	0	9	0	0	0	13	0	0	0	0	0	0	0	14	67	113	0	0	0	0	0	0	-99	0	0	0	0	2	0	0	0	4	-99	0	-99	-99
201504030080	2015	4	3	0	1	1	1	0	1	113	10	32.069286	20.151144	0	9	0	0	0	13	0	0	0	0	0	0	0	14	67	113	0	0	0	0	0	0	-99	0	0	0	0	1	0	0	0	4	-99	0	-99	-99
201504030084	2015	4	3	0	1	1	1	0	0	107	7	42.874722	74.612222	0	7	0	0	0	8	19	0	0	0	0	0	0	12	61	107	0	0	0	0	0	0	-99	0	0	0	0	0	0	0	0	4	-99	0	-99	-99
201504030085	2015	4	3	0	1	1	1	0	0	200	10	35.928802	36.631451	0	9	0	0	0	13	0	0	0	0	0	0	0	12	61	200	0	0	0	0	0	0	-99	0	2	0	0	0	0	0	0	4	-99	0	-99	-99
201504030086	2015	4	3	0	1	1	1	0	0	160	5	6.600683	125.399056	0	1	0	0	0	5	2	5	3	5	4	0	0	2	15	160	0	0	0	0	0	0	3	0	2	0	2	2	0	1	0	4	-99	0	-99	-99
201504030089	2015	4	3	0	1	1	0	1	0	205	5	6.763987	101.312535	0	2	0	0	0	5	2	0	0	0	0	0	0	4	35	205	0	0	0	0	0	0	-99	0	0	0	0	2	0	0	0	4	-99	0	-99	-99
201504030090	2015	4	3	0	1	1	0	1	0	160	5	7.677712	126.088223	0	3	0	0	0	6	16	0	0	0	0	0	0	4	34	160	0	0	0	0	0	0	-99	0	0	0	0	3	0	0	0	4	-99	0	-99	-99
201504030095	2015	4	3	0	1	1	1	0	0	14	12	-37.789922	145.170775	0	7	0	0	0	8	18	0	0	0	0	0	0	15	86	14	0	0	0	0	0	0	-99	0	0	0	0	0	0	0	1	3	-99	0	-99	-99
201504040001	2015	4	4	0	1	1	1	0	0	205	5	5.989846	101.570559	1	3	0	0	0	6	12	0	0	0	0	0	0	2	21	205	0	0	0	0	0	0	-99	0	0	0	0	0	0	0	1	3	-99	0	-99	-99
201504040002	2015	4	4	0	1	1	0	1	0	205	5	6.232697	101.805729	1	3	0	0	0	6	17	0	0	0	0	0	0	4	39	205	0	0	0	0	0	0	-99	0	0	0	0	0	0	0	1	3	-99	0	-99	-99
201504040005	2015	4	4	0	1	1	1	0	0	95	10	33.303566	44.371773	0	3	0	0	0	6	16	0	0	0	0	0	0	14	67	95	0	0	0	0	0	0	-99	0	2	0	0	6	0	0	-9	4	-99	0	-99	-99
201504040006	2015	4	4	0	1	1	1	0	0	95	10	33.303566	44.371773	0	3	0	0	0	6	16	0	0	0	0	0	0	3	23	95	0	0	0	0	0	0	-99	0	1	0	0	3	0	0	0	4	-99	0	-99	-99
201504040007	2015	4	4	0	1	1	1	0	0	95	10	33.744999	45.545616	1	2	0	0	0	5	5	0	0	0	0	0	0	14	78	95	0	0	0	0	0	0	-99	0	0	0	0	6	0	0	0	4	-99	0	-99	-99
201504040016	2015	4	4	0	1	1	1	0	0	60	10	30.022924	31.185192	0	3	0	0	0	6	17	0	0	0	0	0	0	8	49	60	0	0	0	0	0	0	-99	0	0	0	0	0	0	0	0	4	-99	0	-99	-99
201504040017	2015	4	4	0	1	1	1	0	0	4	6	36.663565	65.751335	0	3	0	0	0	6	15	0	0	0	0	0	0	20	0	0	0	0	0	0	0	0	3	3	0	0	0	0	0	0	0	4	-99	0	-99	-99
201504040019	2015	4	4	0	1	1	1	0	0	153	6	30.098261	66.944481	0	3	0	0	0	6	8	0	0	0	0	0	0	20	0	153	0	0	0	0	0	0	-99	0	0	0	0	0	0	0	0	4	-99	0	-99	-99
201504040020	2015	4	4	0	1	1	1	0	0	153	6	33.590603	71.44062	0	2	0	0	0	5	5	0	0	0	0	0	0	3	23	153	0	0	0	0	0	0	-99	0	0	0	0	4	0	0	1	3	-99	0	-99	-99
201504040021	2015	4	4	1	1	1	1	0	0	153	6	29.896093	69.250237	0	6	0	0	0	5	5	0	0	0	0	0	0	14	68	153	0	0	0	0	0	0	-99	0	0	0	0	0	0	0	0	4	-99	1	2	0
201504040022	2015	4	4	0	1	1	0	1	0	214	9	48.143208	37.753361	1	3	0	0	0	6	8	0	0	0	0	0	0	4	34	214	0	0	0	0	0	0	-99	0	3	0	0	0	0	0	-9	4	-99	0	-99	-99
201504040027	2015	4	4	0	1	1	1	0	0	153	6	34.866649	71.430131	0	2	0	0	0	5	4	0	0	0	0	0	0	3	25	153	0	0	0	0	0	0	-99	0	1	0	0	0	0	0	0	4	-99	0	-99	-99
201504040038	2015	4	4	0	1	1	1	0	0	92	6	19.166785	73.23679	0	1	0	0	0	9	23	0	0	0	0	0	0	22	109	92	0	0	0	0	0	0	3	0	1	0	0	0	0	0	0	4	-99	0	-99	-99
201504040052	2015	4	4	0	0	1	1	1	0	209	10	41.002512	39.717336	1	2	0	0	0	5	4	0	0	0	0	0	0	14	82	209	0	0	0	0	0	0	-99	0	0	0	0	1	0	0	1	3	-99	0	-99	-99
201504040054	2015	4	3	0	1	1	1	0	0	113	10	32.867867	13.189067	1	3	0	0	0	6	11	0	0	0	0	0	0	1	6	21	6	43	113	0	0	0	-99	0	1	0	0	1	0	0	1	3	-99	0	-99	-99
201504040058	2015	4	4	0	1	1	1	0	0	155	10	31.415948	34.365873	0	3	0	0	0	6	15	0	0	0	0	0	0	20	0	0	0	0	0	0	0	0	-99	0	0	0	0	0	0	0	0	4	-99	0	-99	-99
201504040061	2015	4	4	0	1	1	1	0	0	229	11	-1.658501	29.220455	0	2	0	0	0	5	5	0	0	0	0	0	0	7	47	422	0	0	0	0	0	0	-99	0	0	0	0	0	0	0	1	3	-99	0	-99	-99
201504050001	2015	4	5	0	1	1	1	0	0	205	5	6.878992	101.274922	1	3	0	0	0	6	17	0	0	0	0	0	0	21	107	205	0	0	0	0	0	0	-99	0	0	0	0	0	0	0	0	4	-99	0	-99	-99
201504050002	2015	4	6	0	1	1	1	0	0	95	10	34.621521	43.668377	0	3	0	0	0	6	16	0	0	0	0	0	0	2	18	95	21	107	95	0	0	0	-99	0	0	0	0	4	0	0	-9	4	-99	0	-99	-99
201504050004	2015	4	5	0	1	1	1	0	0	95	10	33.303566	44.371773	0	3	0	0	0	6	16	0	0	0	0	0	0	14	67	95	0	0	0	0	0	0	-99	0	2	0	0	5	0	0	-9	4	-99	0	-99	-99
201504050005	2015	4	5	0	1	1	1	0	0	95	10	33.303566	44.371773	0	3	0	0	0	6	16	0	0	0	0	0	0	14	67	95	0	0	0	0	0	0	-99	0	1	0	0	6	0	0	-9	4	-99	0	-99	-99
201504050006	2015	4	5	0	1	1	1	0	0	95	10	33.460819	44.157433	0	3	0	0	0	6	16	0	0	0	0	0	0	14	74	95	0	0	0	0	0	0	-99	0	3	0	0	8	0	0	1	3	-99	0	-99	-99
201504050009	2015	4	5	0	1	1	1	0	0	4	6	37.132138	69.829295	0	3	0	0	0	6	8	0	0	0	0	0	0	14	78	4	0	0	0	0	0	0	-99	0	0	0	0	2	0	0	-9	4	-99	0	-99	-99
201504050012	2015	4	5	0	1	1	1	0	0	4	6	31.631083	65.742226	0	3	0	0	0	6	15	0	0	0	0	0	0	20	0	0	0	0	0	0	0	0	-99	0	0	0	0	0	0	0	0	4	-99	0	-99	-99
201504050013	2015	4	4	0	1	1	1	0	0	4	6	35.947552	68.710327	0	3	0	0	0	6	15	0	0	0	0	0	0	4	34	4	14	67	4	0	0	0	-99	0	4	0	0	5	0	0	-9	4	-99	0	-99	-99
201504050014	2015	4	5	0	1	1	1	0	0	4	6	31.81376	64.632048	0	3	0	0	0	6	8	0	0	0	0	0	0	4	35	4	14	67	4	0	0	0	-99	0	2	0	0	6	0	0	1	4	-99	0	-99	-99
201504050019	2015	4	5	0	1	1	1	0	0	4	6	32.37001	62.128456	0	3	0	0	0	6	16	0	0	0	0	0	0	1	7	4	0	0	0	0	0	0	-99	0	1	0	0	1	0	0	1	3	-99	0	-99	-99
201504050027	2015	4	5	0	1	1	0	1	0	153	6	33.718056	70.821924	0	2	0	0	0	5	5	0	0	0	0	0	0	4	29	153	0	0	0	0	0	0	12	0	4	0	0	4	0	0	1	4	-99	0	-99	-99
201504050030	2015	4	5	0	1	1	0	1	0	214	9	47.098835	37.81987	1	3	0	0	0	6	8	0	0	0	0	0	0	4	35	214	0	0	0	0	0	0	-99	0	2	0	0	1	0	0	1	4	-99	0	-99	-99
201504050031	2015	4	5	0	1	1	1	0	0	153	6	34.006004	71.53743	0	3	0	0	0	6	16	0	0	0	0	0	0	14	74	153	0	0	0	0	0	0	-99	0	0	0	0	0	0	0	0	4	-99	0	-99	-99
201504050032	2015	4	5	0	1	1	1	0	1	603	8	54.819164	-7.467909	0	7	0	0	0	8	19	0	0	0	0	0	0	14	73	233	0	0	0	0	0	0	-99	0	0	0	0	0	0	0	1	3	-99	0	-99	-99
201504050033	2015	4	5	0	1	1	1	0	1	603	8	54.819164	-7.467909	0	2	0	0	0	8	19	0	0	0	0	0	0	13	64	233	0	0	0	0	0	0	-99	0	0	0	0	0	0	0	1	3	-99	0	-99	-99
201504050039	2015	4	5	0	1	1	1	0	0	84	11	9.509167	-13.712222	0	1	0	0	0	5	5	12	0	0	0	0	0	2	15	84	0	0	0	0	0	0	2	0	0	0	0	0	0	0	0	4	-99	0	-99	-99
201504050051	2015	4	5	0	1	1	1	0	0	95	10	33.303566	44.371773	0	2	0	0	0	5	5	0	0	0	0	0	0	3	23	95	0	0	0	0	0	0	-99	0	4	0	0	1	0	0	1	3	-99	0	-99	-99
201504050060	2015	4	5	0	0	1	1	1	0	153	6	24.891115	67.143311	1	2	0	0	0	5	3	0	0	0	0	0	0	3	25	153	0	0	0	0	0	0	-99	0	1	0	0	0	0	0	1	3	-99	0	-99	-99
201504050064	2015	4	5	0	1	1	1	0	0	147	11	10.297885	7.341397	0	2	0	0	0	5	5	0	0	0	0	0	0	14	71	147	0	0	0	0	0	0	-99	0	11	0	0	0	0	0	0	4	-99	0	-99	-99
201504050071	2015	4	5	0	1	1	1	0	1	60	10	31.211645	34.110425	0	3	0	0	0	6	16	0	0	0	0	0	0	4	35	60	0	0	0	0	0	0	-99	0	0	0	0	0	0	0	0	4	-99	0	-99	-99
201504050072	2015	4	5	0	1	1	1	0	1	60	10	31.211645	34.110425	0	3	0	0	0	6	16	0	0	0	0	0	0	4	35	60	0	0	0	0	0	0	-99	0	0	0	0	0	0	0	0	4	-99	0	-99	-99
201504060001	2015	4	6	0	1	1	1	0	0	205	5	6.117556	101.85907	1	3	0	0	0	6	31	0	0	0	0	0	0	2	15	205	0	0	0	0	0	0	-99	0	0	0	0	1	0	0	0	4	-99	0	-99	-99
201504060007	2015	4	6	0	1	1	1	0	0	95	10	33.303566	44.371773	0	3	0	0	0	6	16	0	0	0	0	0	0	19	99	95	0	0	0	0	0	0	-99	0	1	0	0	5	0	0	1	3	-99	0	-99	-99
201504060009	2015	4	6	0	1	1	1	0	0	95	10	33.303566	44.371773	0	3	0	0	0	6	16	0	0	0	0	0	0	14	67	95	0	0	0	0	0	0	-99	0	2	0	0	7	0	0	0	4	-99	0	-99	-99
201504060011	2015	4	6	0	1	1	1	0	0	95	10	33.303566	44.371773	0	3	0	0	0	6	29	0	0	0	0	0	0	1	7	95	0	0	0	0	0	0	-99	0	1	0	0	2	0	0	1	3	-99	0	-99	-99
201504060012	2015	4	6	0	1	1	1	0	0	95	10	33.303566	44.371773	0	3	0	0	0	6	16	0	0	0	0	0	0	14	67	95	0	0	0	0	0	0	-99	0	2	0	0	7	0	0	-9	4	-99	0	-99	-99
201504060013	2015	4	6	0	1	1	1	0	0	95	10	33.303566	44.371773	0	3	0	0	0	6	16	0	0	0	0	0	0	14	67	95	0	0	0	0	0	0	-99	0	1	0	0	6	0	0	-9	4	-99	0	-99	-99
201504060014	2015	4	6	0	1	1	1	0	0	4	6	34.267438	70.785075	0	2	0	0	0	5	5	0	0	0	0	0	0	2	18	4	0	0	0	0	0	0	-99	0	1	0	0	2	0	0	1	3	-99	0	-99	-99
201504060017	2015	4	6	0	1	1	1	0	0	4	6	33.93706	68.925811	0	3	0	0	0	6	11	0	0	0	0	0	0	8	49	4	0	0	0	0	0	0	-99	0	1	0	0	0	0	0	1	3	-99	0	-99	-99
201504060020	2015	4	6	0	1	1	1	0	0	92	6	18.790598	80.816123	0	3	0	0	0	6	8	0	0	0	0	0	0	3	25	92	0	0	0	0	0	0	-99	0	0	0	0	3	0	0	0	4	-99	0	-99	-99
201504060026	2015	4	6	0	1	1	1	0	0	60	10	24.088088	32.901032	0	3	0	0	0	6	16	0	0	0	0	0	0	14	67	60	0	0	0	0	0	0	-99	0	0	0	0	3	0	0	0	4	-99	0	-99	-99
201504060027	2015	4	6	0	1	1	1	0	0	113	10	24.187631	23.283384	0	7	0	0	0	8	18	0	0	0	0	0	0	10	54	113	0	0	0	0	0	0	-99	0	0	0	0	0	0	0	1	3	-99	0	-99	-99
201504060035	2015	4	6	0	1	1	0	1	0	153	6	26.95827	64.132245	0	2	0	0	0	5	5	0	0	0	0	0	0	4	29	153	0	0	0	0	0	0	-99	0	0	0	0	0	0	0	-9	4	-99	0	-99	-99
201504060046	2015	4	6	0	1	1	1	0	0	123	11	14.138889	-5.018889	0	2	0	0	0	5	5	0	0	0	0	0	0	2	18	123	0	0	0	0	0	0	-99	0	1	0	0	0	0	0	0	4	-99	0	-99	-99
201504060056	2015	4	6	0	1	1	1	0	1	147	11	10.612418	12.19304	0	3	0	0	1	6	13	0	0	0	0	0	0	20	0	147	0	0	0	0	0	0	1	0	1	0	1	0	0	0	0	4	-99	0	-99	-99
201504060057	2015	4	6	0	1	1	1	0	1	147	11	10.612186	12.193967	0	3	0	0	1	6	13	0	0	0	0	0	0	15	86	147	0	0	0	0	0	0	1	0	0	0	0	0	0	0	0	4	-99	0	-99	-99
201504060058	2015	4	6	0	1	1	1	0	0	147	11	12.779693	6.782386	0	2	0	0	0	5	5	0	0	0	0	0	0	14	67	147	0	0	0	0	0	0	30	0	11	0	0	23	0	0	0	4	-99	0	-99	-99
201504060059	2015	4	6	0	1	1	1	0	0	113	10	32.069286	20.151144	0	3	0	0	0	6	8	0	0	0	0	0	0	1	0	113	0	0	0	0	0	0	-99	0	1	0	0	1	0	0	-9	4	-99	0	-99	-99
201504060060	2015	4	5	0	1	1	1	0	0	113	10	32.069286	20.151144	0	3	0	0	0	6	11	0	0	0	0	0	0	14	75	113	0	0	0	0	0	0	-99	0	0	0	0	1	0	0	1	3	-99	0	-99	-99
201504060061	2015	4	5	0	1	1	1	0	0	113	10	32.069286	20.151144	0	3	0	0	0	6	16	0	0	0	0	0	0	14	75	113	0	0	0	0	0	0	-99	0	0	0	0	1	0	0	0	4	-99	0	-99	-99
201504060062	2015	4	6	0	1	1	1	0	0	113	10	32.069286	20.151144	0	3	0	0	0	6	11	0	0	0	0	0	0	1	6	113	0	0	0	0	0	0	-99	0	0	0	0	0	0	0	1	3	-99	0	-99	-99
201504060063	2015	4	6	0	1	1	1	0	0	147	11	10.518283	7.43316	0	2	0	0	0	5	5	0	0	0	0	0	0	14	74	147	0	0	0	0	0	0	-99	0	14	0	0	0	0	0	0	4	-99	0	-99	-99
201504060064	2015	4	6	0	1	1	1	0	0	123	11	18.442701	1.411332	1	3	0	0	0	6	8	0	0	0	0	0	0	7	47	422	0	0	0	0	0	0	-99	0	0	0	0	2	0	0	0	4	-99	0	-99	-99
201504060070	2015	4	6	0	1	1	1	0	0	153	6	34.76548	72.328087	0	2	0	0	0	5	5	0	0	0	0	0	0	2	15	153	0	0	0	0	0	0	-99	0	1	0	0	0	0	0	0	4	-99	0	-99	-99
201504060073	2015	4	6	0	1	1	0	1	0	60	10	31.174071	34.14131	1	3	0	0	1	6	15	0	0	0	0	0	0	4	36	60	0	0	0	0	0	0	1	0	1	0	1	0	0	0	0	4	-99	0	-99	-99
201504060075	2015	4	6	0	1	1	1	0	0	60	10	31.212225	34.117065	0	3	0	0	0	6	11	0	0	0	0	0	0	3	22	60	0	0	0	0	0	0	-99	0	0	0	0	0	0	0	-9	4	-99	0	-99	-99
201504060076	2015	4	6	0	1	1	0	1	0	60	10	31.211786	34.151035	0	2	0	0	0	5	5	0	0	0	0	0	0	4	36	60	0	0	0	0	0	0	-99	0	1	0	0	0	0	0	0	4	-99	0	-99	-99
201504070011	2015	4	7	0	1	1	1	0	0	214	9	49.994061	36.230861	0	3	0	0	0	6	16	0	0	0	0	0	0	19	100	214	0	0	0	0	0	0	-99	0	0	0	0	0	0	0	1	4	-99	0	-99	-99
201504070017	2015	4	7	0	1	1	1	0	0	4	6	32.948371	69.17131	0	2	0	0	0	6	11	5	5	0	0	0	0	3	24	4	14	76	4	0	0	0	-99	0	1	0	0	2	0	0	1	3	-99	0	-99	-99
201504070032	2015	4	7	0	1	1	1	0	0	113	10	32.069286	20.151144	0	3	0	0	0	6	11	0	0	0	0	0	0	1	1	113	0	0	0	0	0	0	-99	0	0	0	0	0	0	0	1	3	-99	0	-99	-99
201504070045	2015	4	7	0	1	1	1	0	0	153	6	33.901374	70.103534	1	3	0	0	0	6	16	0	0	0	0	0	0	20	0	153	0	0	0	0	0	0	-99	0	0	0	0	0	0	0	0	4	-99	0	-99	-99
201504070050	2015	4	7	0	1	1	1	0	0	4	6	31.614631	65.693664	0	3	0	0	0	6	17	6	16	0	0	0	0	20	0	0	0	0	0	0	0	0	-99	0	0	0	0	0	0	0	0	4	-99	0	-99	-99
201504070051	2015	4	7	0	1	1	1	0	0	4	6	36.050307	64.903183	0	3	0	0	0	6	17	6	16	0	0	0	0	20	0	0	0	0	0	0	0	0	-99	0	0	0	0	0	0	0	0	4	-99	0	-99	-99
201504070058	2015	4	7	1	1	1	1	0	0	153	6	31.706888	70.134804	0	6	0	0	0	5	5	0	0	0	0	0	0	3	25	153	0	0	0	0	0	0	-99	0	0	0	0	0	0	0	0	4	-99	1	4	0
201504080005	2015	4	8	0	1	1	1	0	0	4	6	34.594612	69.76059	0	1	0	0	0	6	8	0	0	0	0	0	0	3	23	4	0	0	0	0	0	0	-99	0	0	0	0	3	0	0	1	3	-99	0	-99	-99
201504080014	2015	4	8	0	1	1	1	0	0	147	11	7.561891	6.578339	0	2	0	0	0	5	5	0	0	0	0	0	0	2	18	147	0	0	0	0	0	0	-99	0	2	0	0	0	0	0	0	4	-99	0	-99	-99
201504080015	2015	4	8	0	1	1	1	0	1	160	5	7.165741	124.517508	0	3	0	0	0	6	7	6	17	0	0	0	0	2	21	160	0	0	0	0	0	0	1	0	0	0	0	0	0	0	1	3	-99	0	-99	-99
201504080016	2015	4	8	0	1	1	1	0	1	160	5	7.165741	124.517508	0	2	0	0	0	5	5	0	0	0	0	0	0	4	34	160	0	0	0	0	0	0	2	0	1	0	0	0	0	0	0	4	-99	0	-99	-99
201504080035	2015	4	8	0	1	1	1	0	0	153	6	28.741923	69.230363	1	3	0	0	0	6	7	6	8	6	17	0	0	4	34	153	19	0	153	0	0	0	-99	0	0	0	0	0	0	0	0	4	-99	0	-99	-99
201504080037	2015	4	8	1	1	1	1	0	0	147	11	5.77622	6.10222	0	6	2	0	0	5	5	0	0	0	0	0	0	2	18	147	14	67	147	0	0	0	20	0	2	0	0	0	0	0	0	4	-99	1	1	0
201504080042	2015	4	8	0	1	1	1	0	0	603	8	54.856471	-5.810265	0	7	0	0	0	8	19	0	0	0	0	0	0	14	76	233	0	0	0	0	0	0	2	2	0	0	0	0	0	0	1	3	-99	0	-99	-99
201504080045	2015	4	8	0	1	1	0	1	0	153	6	33.814811	70.747433	0	3	0	0	0	6	16	0	0	0	0	0	0	4	34	153	0	0	0	0	0	0	-99	0	2	0	0	0	0	0	0	4	-99	0	-99	-99
201504080051	2015	4	8	0	1	1	1	0	0	153	6	24.891115	67.143311	0	2	0	0	0	5	5	0	0	0	0	0	0	3	23	153	0	0	0	0	0	0	-99	0	1	0	0	1	0	0	1	3	-99	0	-99	-99
201504080052	2015	4	8	0	0	1	1	1	0	153	6	34.149919	71.742588	0	3	0	0	0	6	7	0	0	0	0	0	0	14	77	153	0	0	0	0	0	0	-99	0	0	0	0	0	0	0	-9	4	-99	0	-99	-99
201504080053	2015	4	8	0	0	1	1	1	0	153	6	34.149997	71.742344	0	3	0	0	0	6	7	0	0	0	0	0	0	1	1	153	0	0	0	0	0	0	-99	0	0	0	0	0	0	0	-9	4	-99	0	-99	-99
201504080054	2015	4	8	0	1	1	1	0	0	603	8	54.553417	-6.003314	0	3	0	0	0	6	31	0	0	0	0	0	0	20	0	233	0	0	0	0	0	0	-99	0	0	0	0	0	0	0	0	4	-99	0	-99	-99
201504090002	2015	4	9	0	0	1	1	1	0	4	6	33.335258	69.928467	0	3	0	0	0	6	17	0	0	0	0	0	0	1	6	4	0	0	0	0	0	0	-99	0	0	0	0	10	0	0	1	3	-99	0	-99	-99
201504090004	2015	4	9	0	1	1	1	0	0	4	6	32.922781	66.192943	0	3	0	0	0	6	8	0	0	0	0	0	0	3	23	4	0	0	0	0	0	0	-99	0	4	0	0	2	0	0	1	3	-99	0	-99	-99
201504090062	2015	4	9	0	1	1	1	0	0	153	6	32.343201	69.847281	0	3	0	0	0	6	12	0	0	0	0	0	0	3	23	153	0	0	0	0	0	0	-99	0	0	0	0	4	0	0	1	3	-99	0	-99	-99
201504090064	2015	4	9	0	0	1	1	1	0	153	6	24.891115	67.143311	0	1	0	0	0	5	5	0	0	0	0	0	0	2	14	153	0	0	0	0	0	0	3	0	0	0	0	1	0	1	1	3	-99	0	-99	-99
201504090065	2015	4	9	0	1	1	1	0	0	164	10	25.303589	51.471283	0	9	0	0	0	13	0	0	0	0	0	0	0	7	46	217	0	0	0	0	0	0	1	1	0	0	0	1	1	0	0	4	-99	0	-99	-99
201504090068	2015	4	9	0	1	1	1	0	0	147	11	6.449744	3.267114	0	1	0	0	0	5	5	0	0	0	0	0	0	2	15	147	0	0	0	0	0	0	-99	0	0	0	0	0	0	0	1	3	-99	0	-99	-99
201504090069	2015	4	9	0	1	1	1	0	0	147	11	10.61966	7.231595	0	2	0	0	0	5	5	0	0	0	0	0	0	14	71	147	0	0	0	0	0	0	-99	0	2	0	0	1	0	0	0	4	-99	0	-99	-99
201504100005	2015	4	10	0	1	1	1	0	0	95	10	33.084538	44.616959	0	3	0	0	0	6	16	0	0	0	0	0	0	14	67	95	0	0	0	0	0	0	-99	0	1	0	0	7	0	0	-9	4	-99	0	-99	-99
201504100026	2015	4	10	0	1	1	1	0	0	214	9	47.827862	37.652819	1	3	0	0	0	6	16	0	0	0	0	0	0	19	100	214	0	0	0	0	0	0	-99	0	0	0	0	0	0	0	1	4	-99	0	-99	-99
[truncated: 10,309 more rows]
[truncated: 19 more columns]
